# Supplementary material for: N-heterocyclic carbene-mediated hydroacylation–Sonogashira/Heck/Suzuki coupling in a single pot: A new cascade reaction
Source: Royal Society of Chemistry journal article supplement (doi:10.1039/c2ob06950d), 2011-11-24

**Electronic Supplementary Information (ESI)**

**N-heterocyclic carbene-mediated hydroacylation-Sonogashira / Heck / Suzuki coupling in a single pot: A new cascade reaction**

**M. Sreenivasulu,<sup>a,b</sup> K. Siva Kumar,<sup>a</sup> P. Rajender Kumar,<sup>a</sup> K. B. Chandrasekhar,<sup>b</sup> Manojit Pal<sup>c,\*</sup>**

*<sup>a</sup>Custom Pharmaceutical Services, Dr. Reddy's Laboratories Limited, Bollaram Road Miyapur, Hyderabad 500 049, India; <sup>b</sup>Department of Chemistry, Jawaharlal Nehru Technological University of Anantapur, Anantapur 515 002, Andhra Pradesh, India; <sup>c</sup>Institute of Life Sciences, University of Hyderabad Campus, Gachibowli, Hyderabad 500 046, Andhra Pradesh, India*

**<sup>1</sup>H and <sup>13</sup>C NMR, MS and HRMS data**

h  
24/11

TDC-213 BINASI in DMSO

NMR-400  
AR.No:ME1119/1987  
Analyst:Haribabu.R  
Date: 26 th Nov 2010

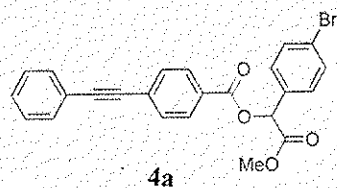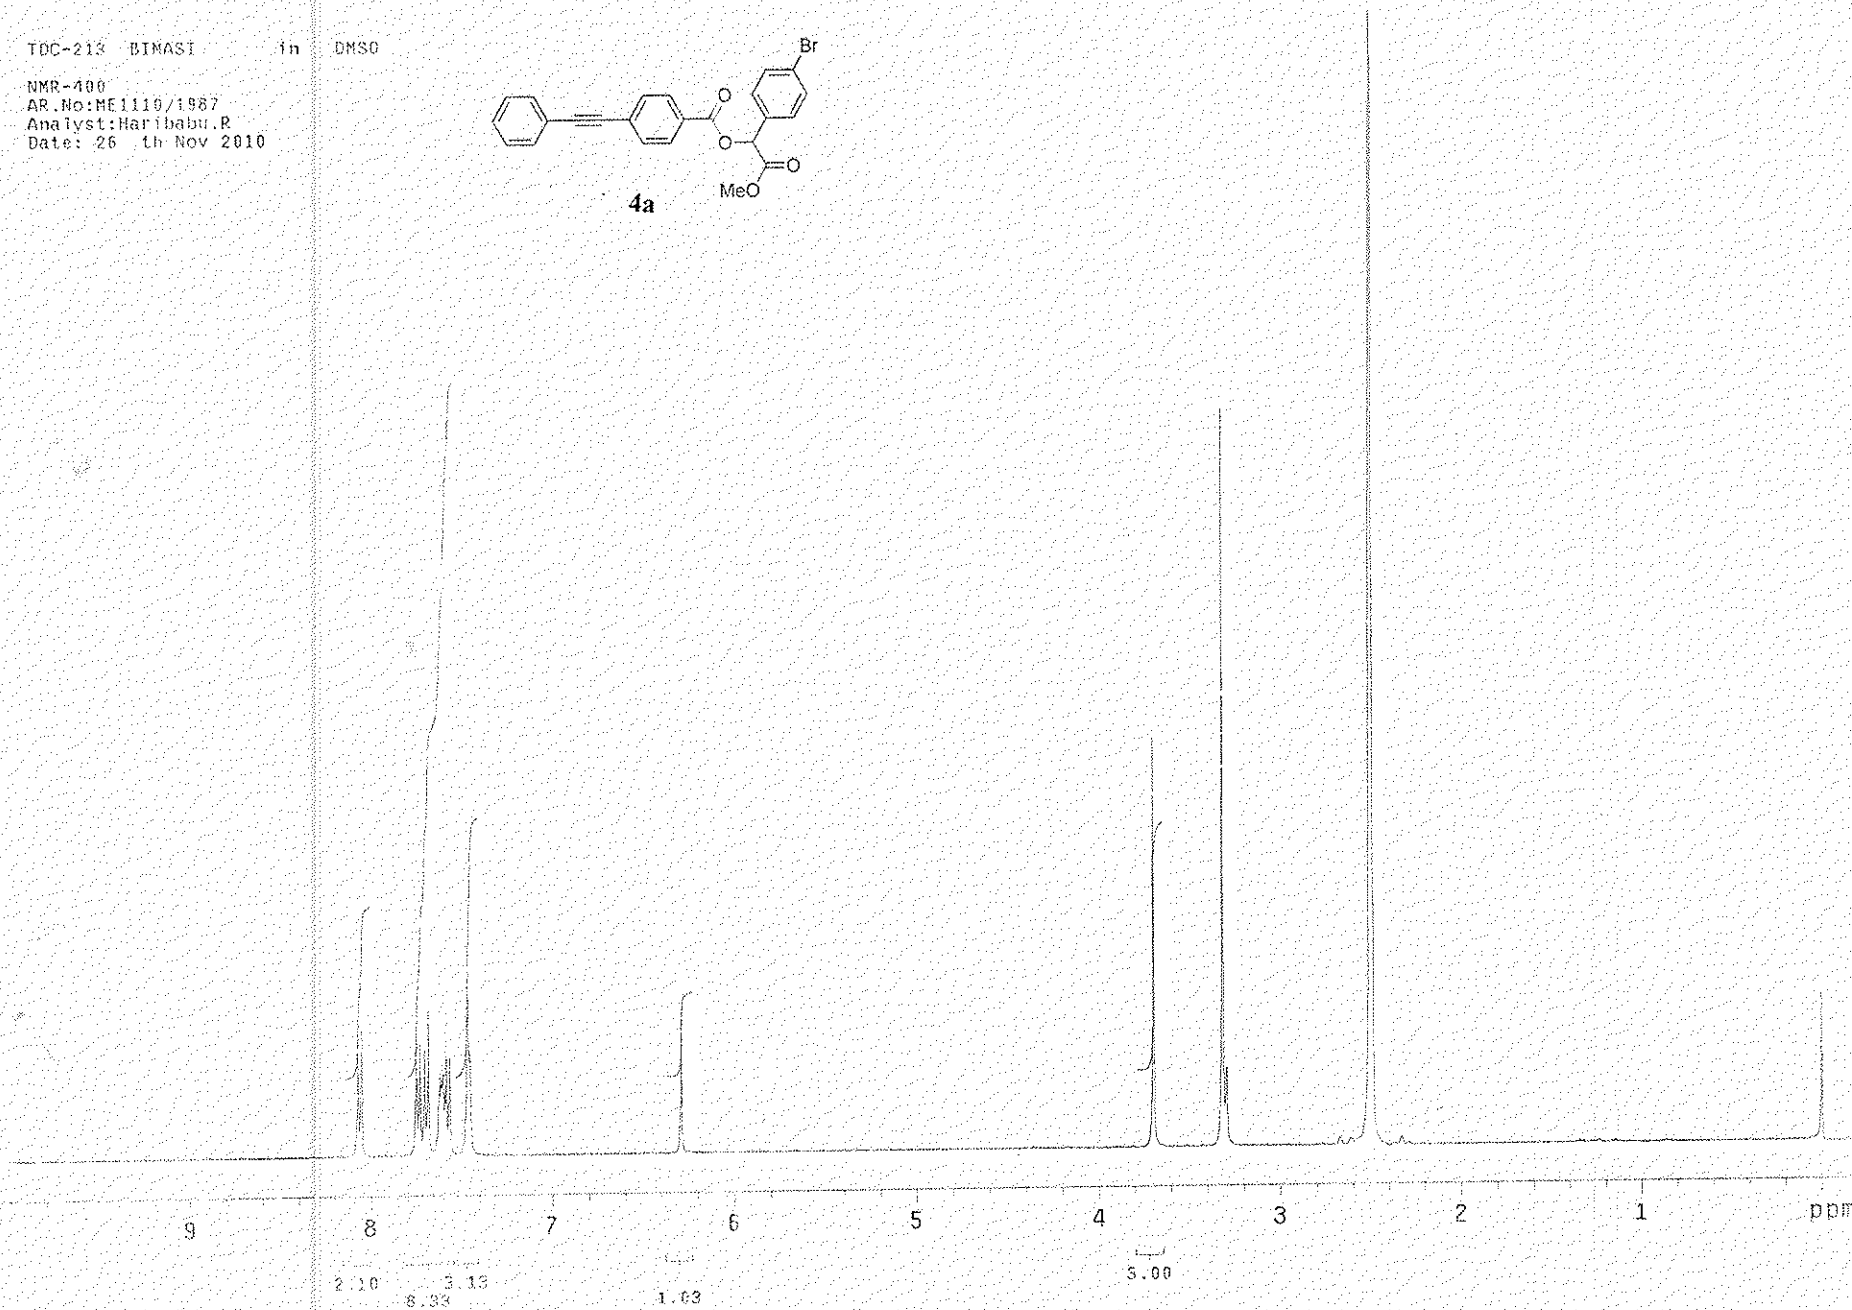

su  
nm

TUC-213 BIMAS1  
NMR-400  
AR.No:ME1210/1671  
Analyst:Haribabu.R  
Date: 17 th Dec. 2010

in DMSO

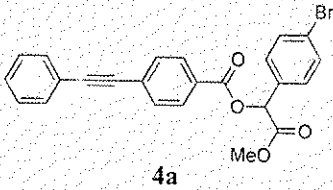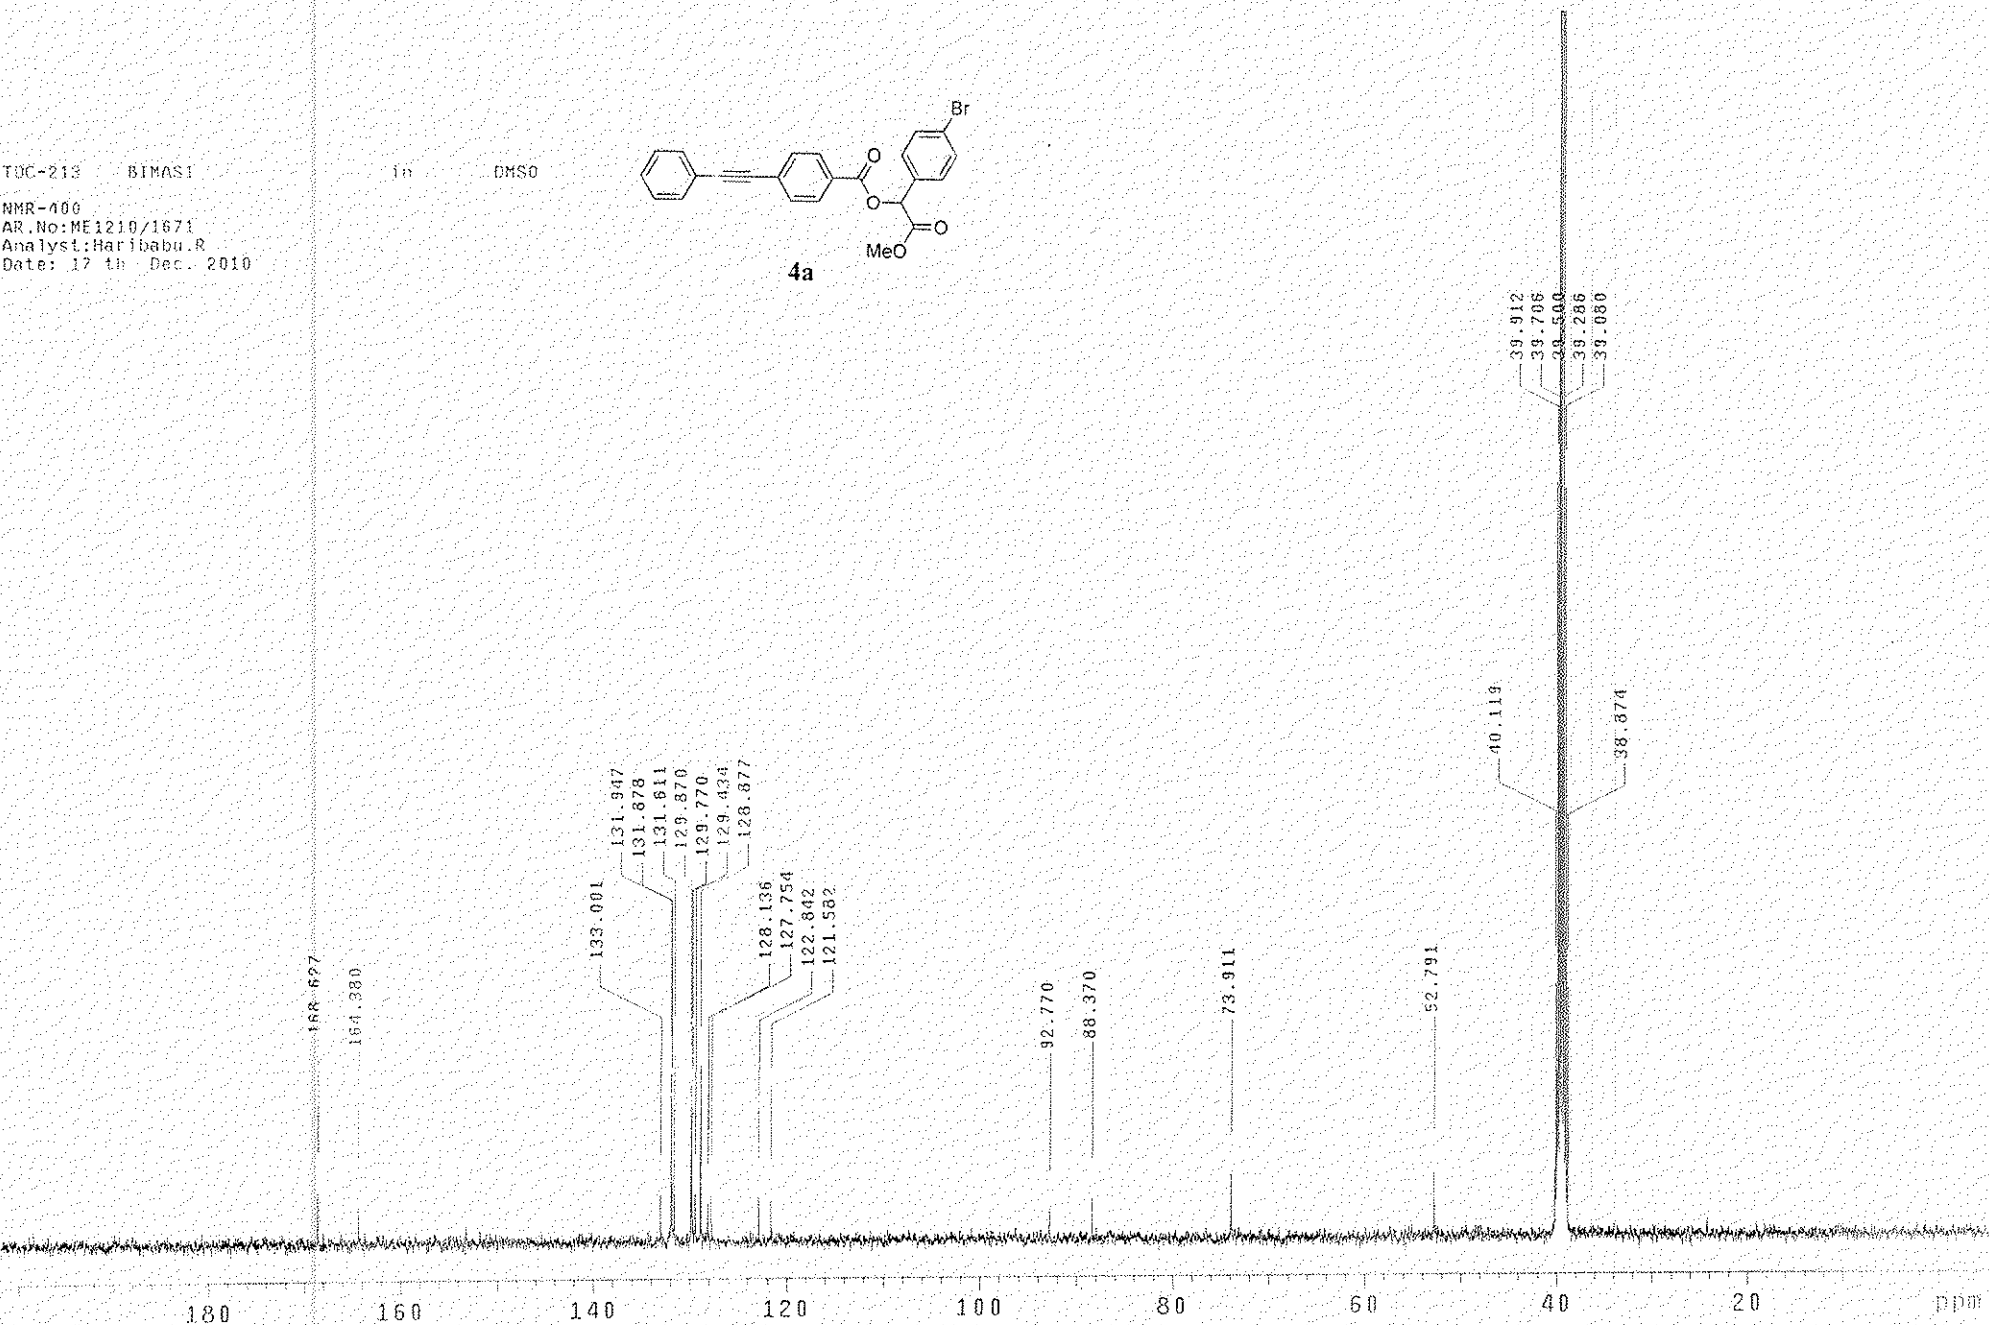

**BIMAS1**

UT1210\_145 16 (0.292) Cm (13:26-81:94)

1: TOF MS ES+

2.02e3

276.0262

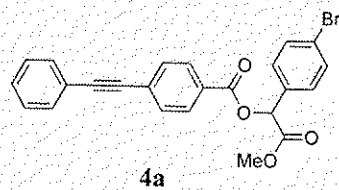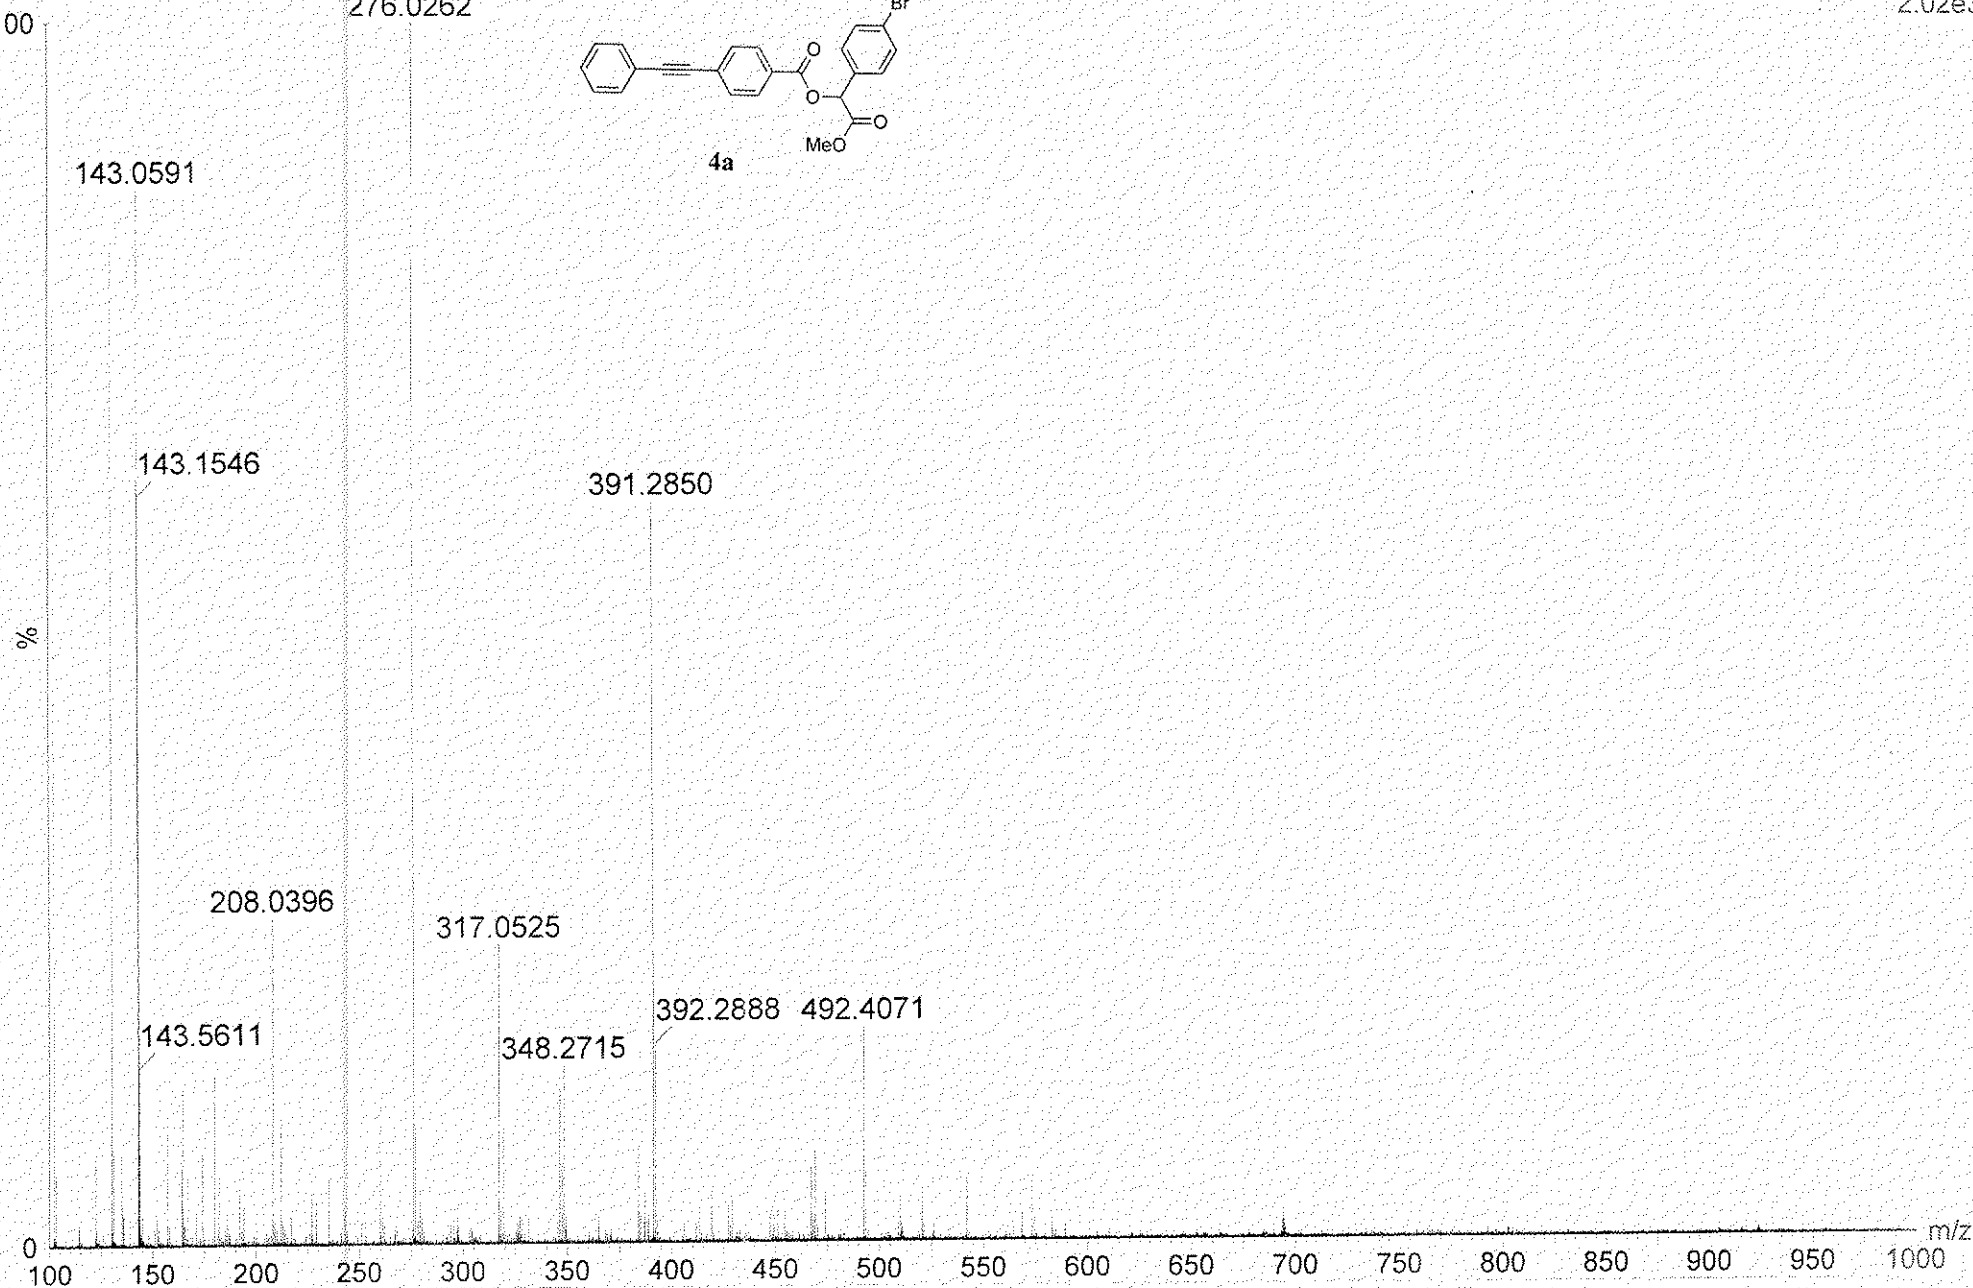



## Elemental Composition Report

Page 1

### Single Mass Analysis

Tolerance = 20.0 PPM / DBE: min = -1.0, max = 80.0

Element prediction: Off

Number of isotope peaks used for i-FIT = 3

Monoisotopic Mass, Even Electron Ions

58 formula(e) evaluated with 3 results within limits (up to 4 best isotopic matches for each mass)

Elements Used:

C: 0-50 H: 0-60 O: 0-5 Br: 0-1

BIMAS1

UT1210\_145 16 (0.292) Cm (13:26-81:94)

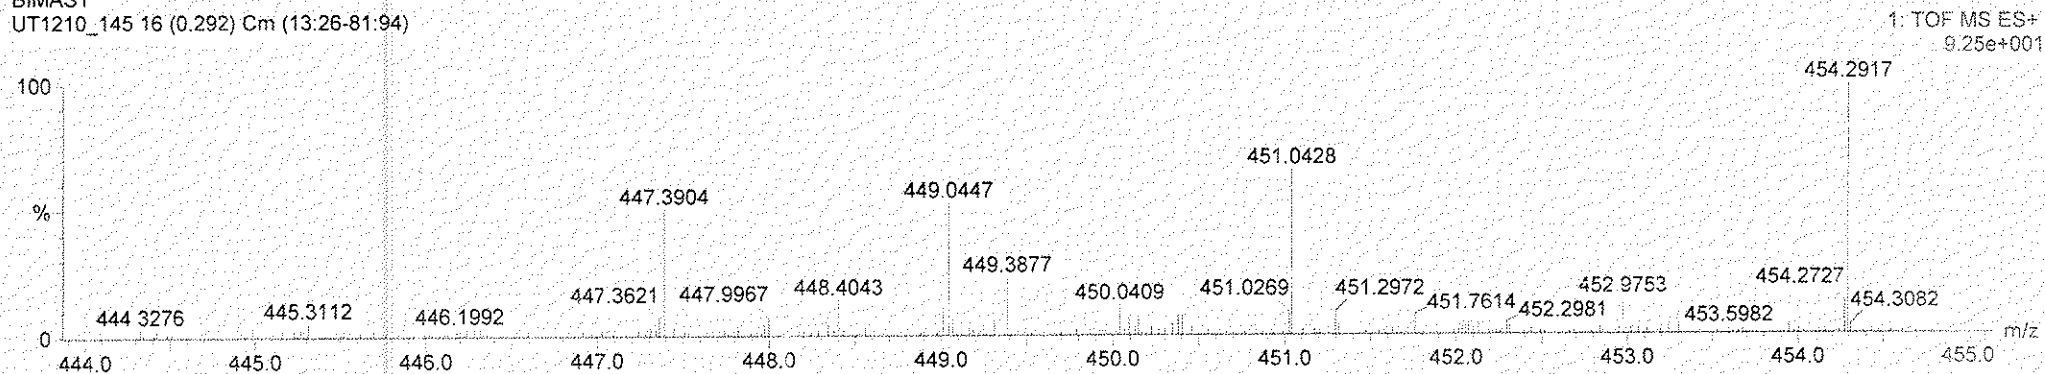

Minimum: -1.0  
Maximum: 5.0 20.0 80.0

| Mass     | Calc. Mass | mDa  | PPM  | DBE  | i-FIT | Formula       |
|----------|------------|------|------|------|-------|---------------|
| 449.0447 | 449.0388   | 5.9  | 13.1 | 15.5 | 1.1   | C24 H18 O4 Br |
|          | 449.0450   | -0.3 | -0.7 | 26.5 | 23.5  | C30 H9 O5     |
|          | 449.0391   | 5.6  | 12.5 | 35.5 | 29.3  | C37 H5        |

har  
13/12

TDC-213 BIMS2 in DMSO

NMR-400  
AR.No:ME1210/1236  
Analyst:Haribabu.R  
Date: 13 th Dec. 2010

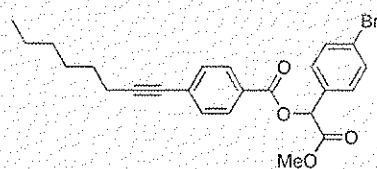

4b

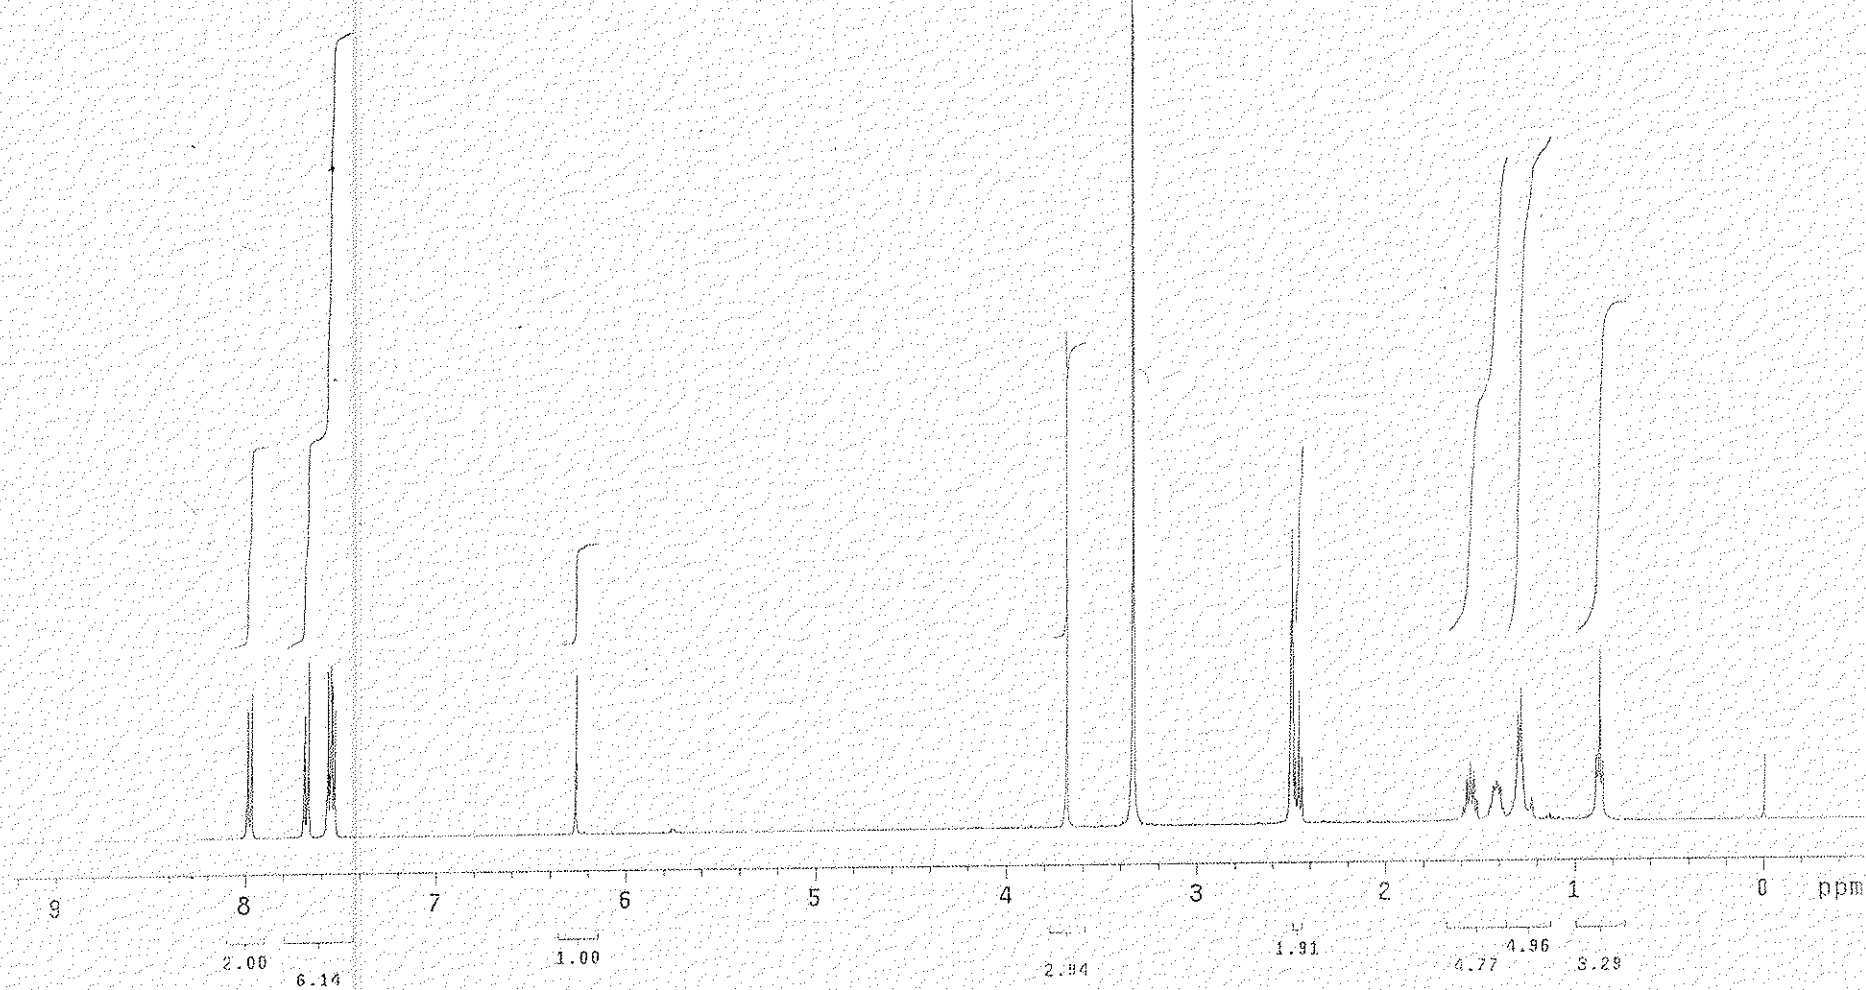

20/12

TDC-213 BIMAS2  
NMR-400  
AR\_No:ME1210/1672  
Analyst:Haribabu.R  
Date: 17 th Dec. 2010

in DMSO

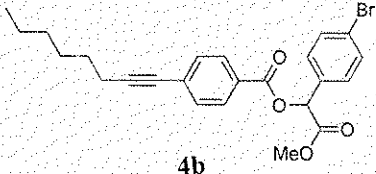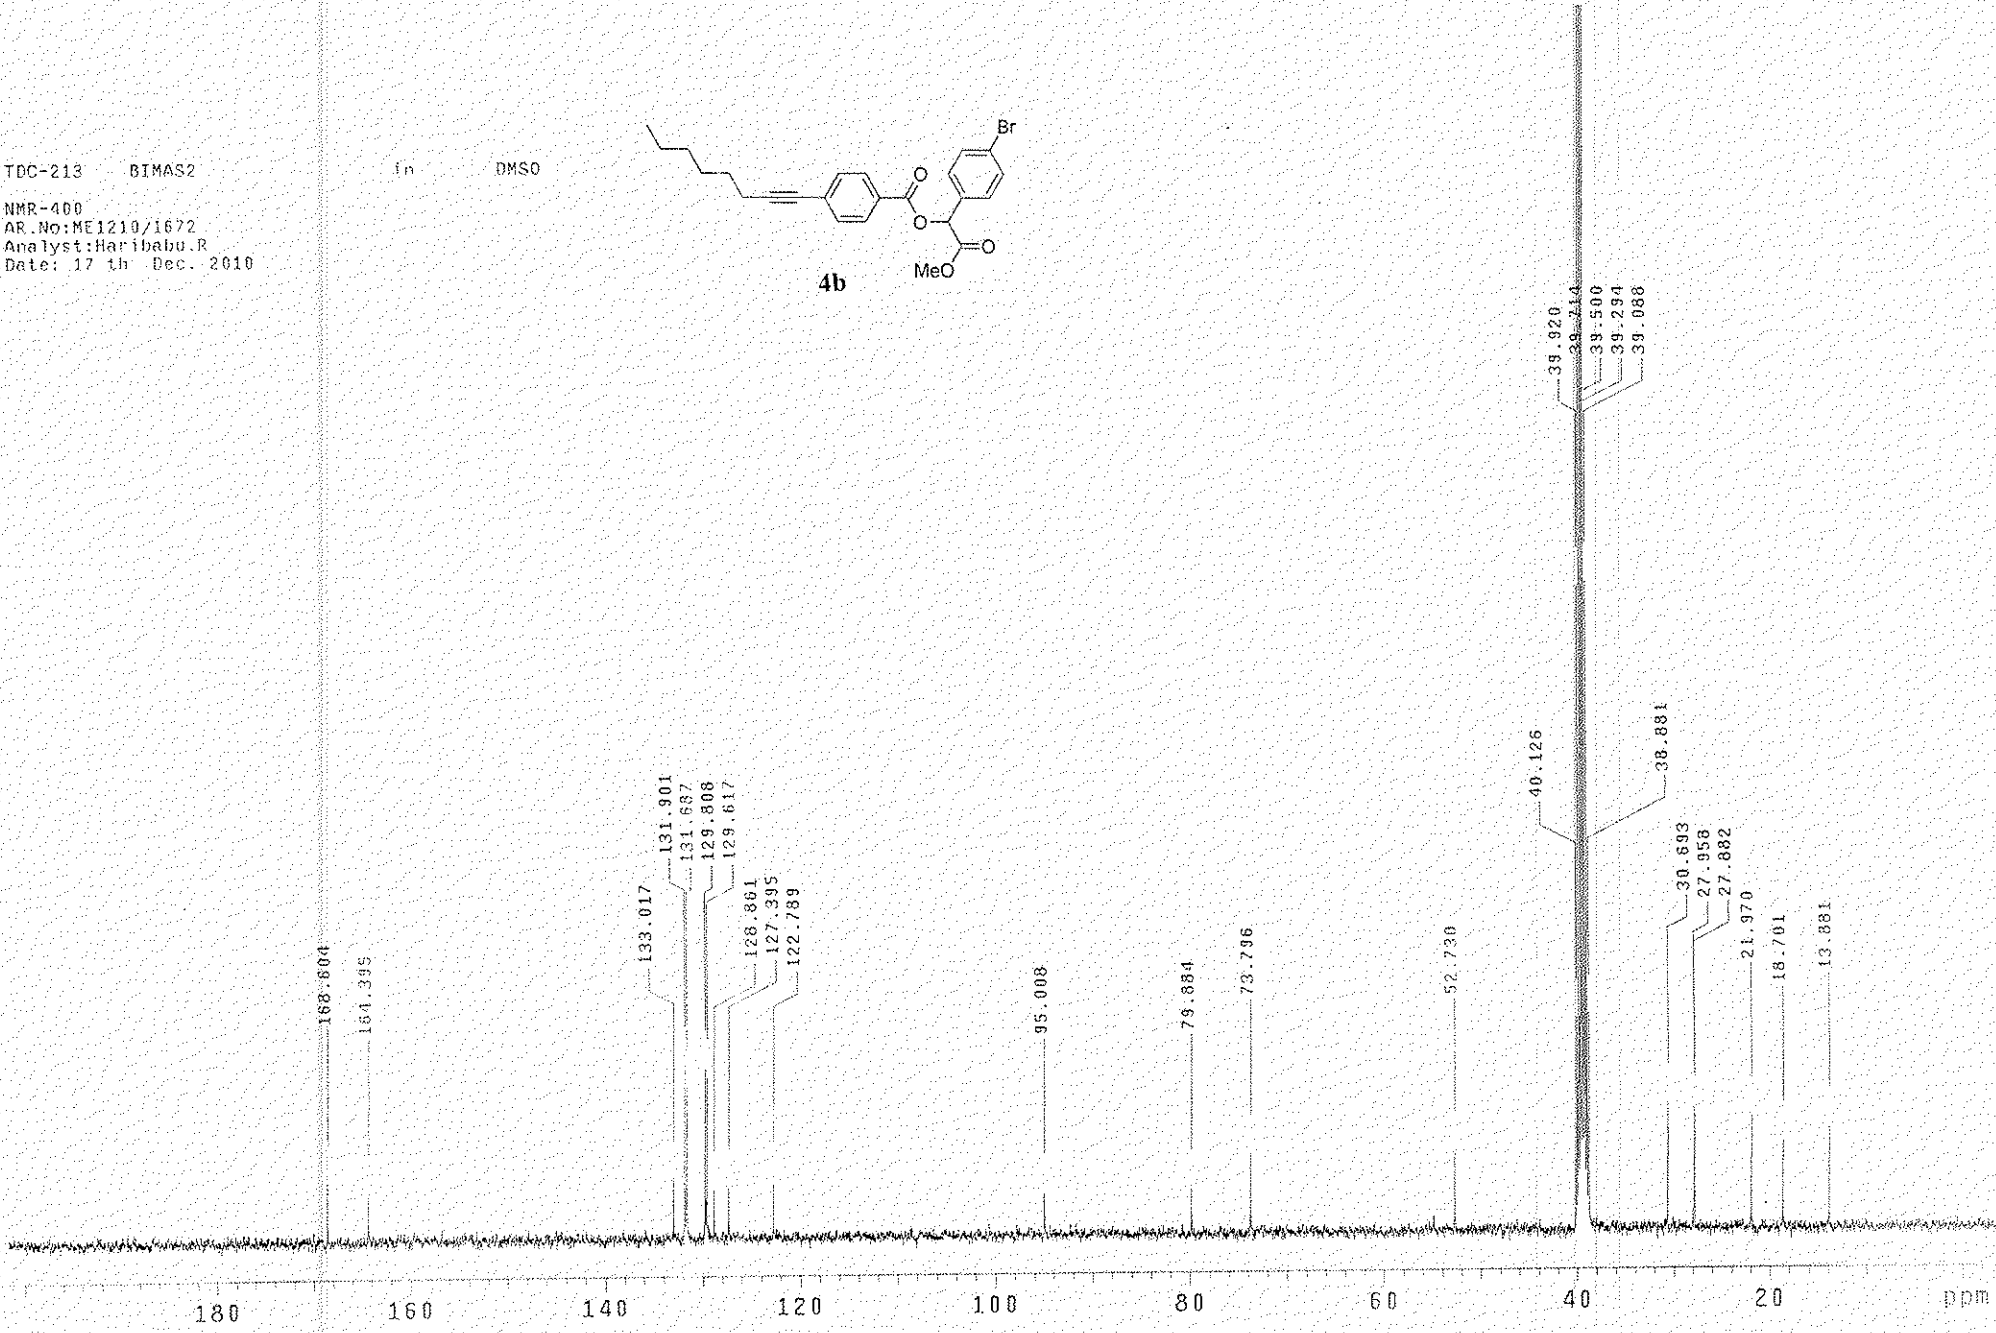

BIMAS2

UT1210\_144 20 (0.367) Cm (20:23-83:88)

1: TOF MS ES+  
1.01e3

477.1121

475.1104

100

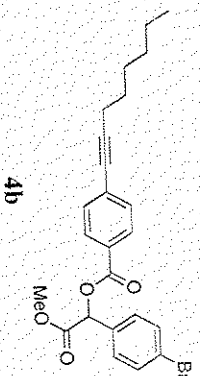

BIMAS2; TDC-213  
A.R.No.UT12101144  
Kaviraj

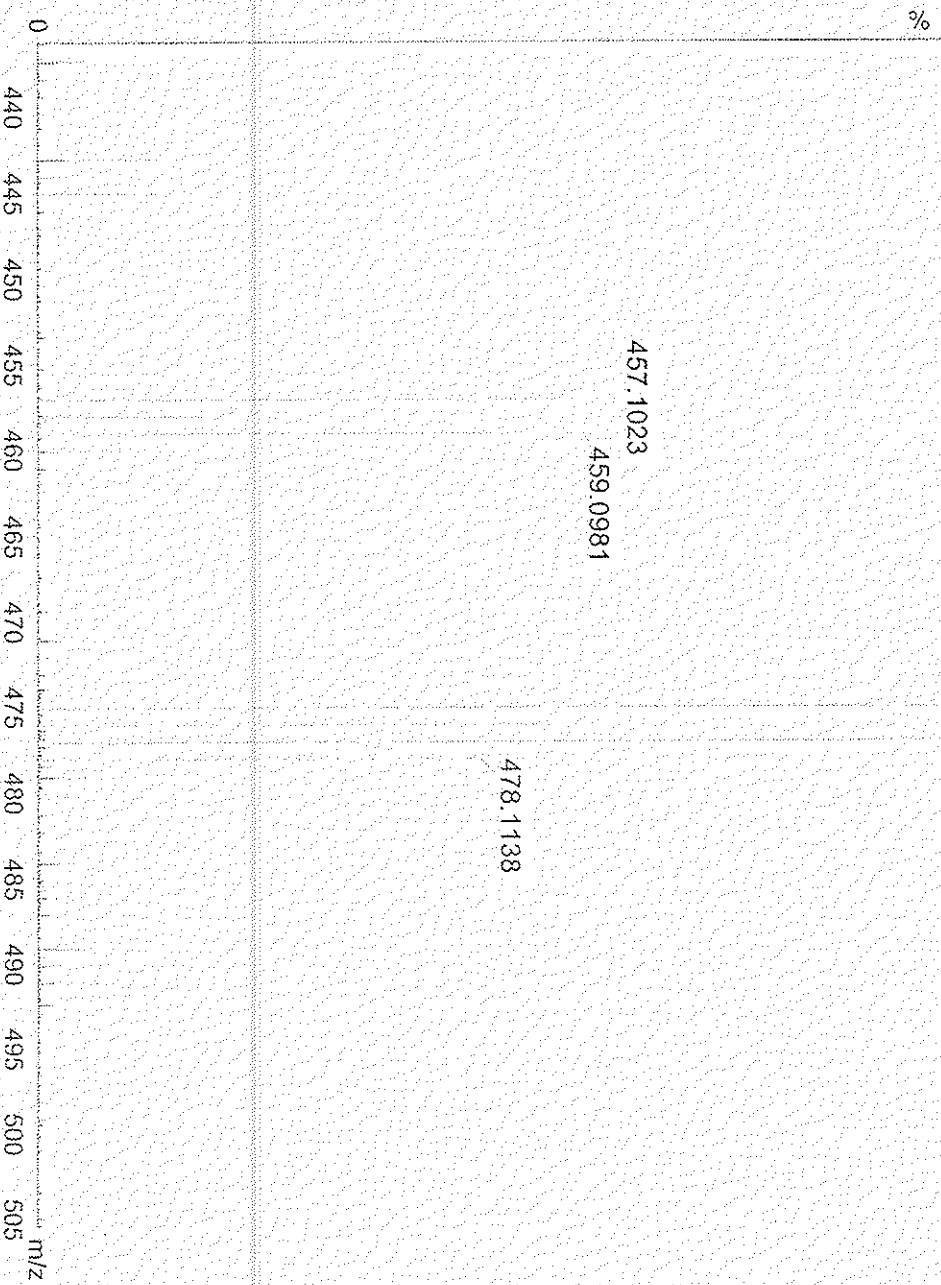



## Elemental Composition Report

### Single Mass Analysis

Tolerance = 10.0 PPM / DBE: min = -1.0, max = 80.0

Element prediction: Off

Number of isotope peaks used for i-FIT = 3

Monoisotopic Mass, Even Electron Ions

81 formula(e) evaluated with 2 results within limits (up to 4 best isotopic matches for each mass)

Elements Used:

C: 0-40 H: 0-55 O: 0-8 Br: 0-1

BIMAS2

UT1210\_144 20 (0.367) Cm (20:23-83:88)

1: TOF MS ES+  
1.01e+003

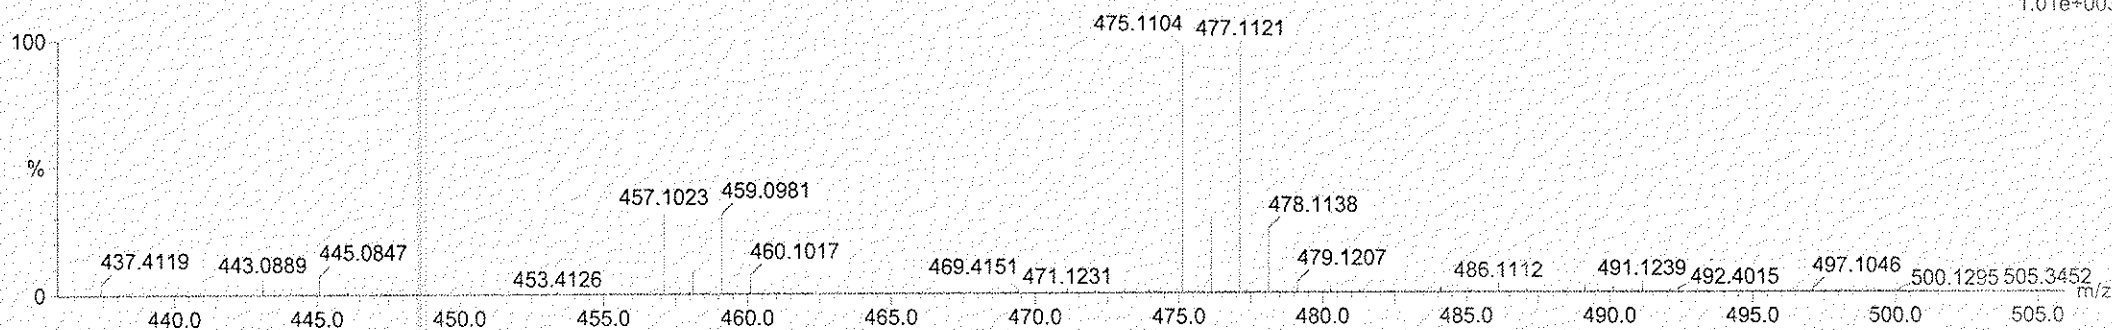

Minimum: -1.0  
Maximum: 5.0 10.0 80.0

| Mass     | Calc. Mass | mDa | PPM | DBE  | i-FIT | Formula       |
|----------|------------|-----|-----|------|-------|---------------|
| 457.1023 | 457.1014   | 0.9 | 2.0 | 11.5 | 1.3   | C24 H26 O4 Br |
|          | 457.1017   | 0.6 | 1.3 | 31.5 | 136.8 | C37 H13       |



26  
9/12

TDC-213      BIMS3  
NMR-400  
AR.No:ME1210/678  
Analyst:Haribabu.R  
Date: 8 th Dec. 201

in DMSO

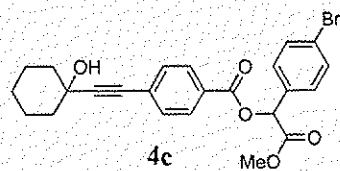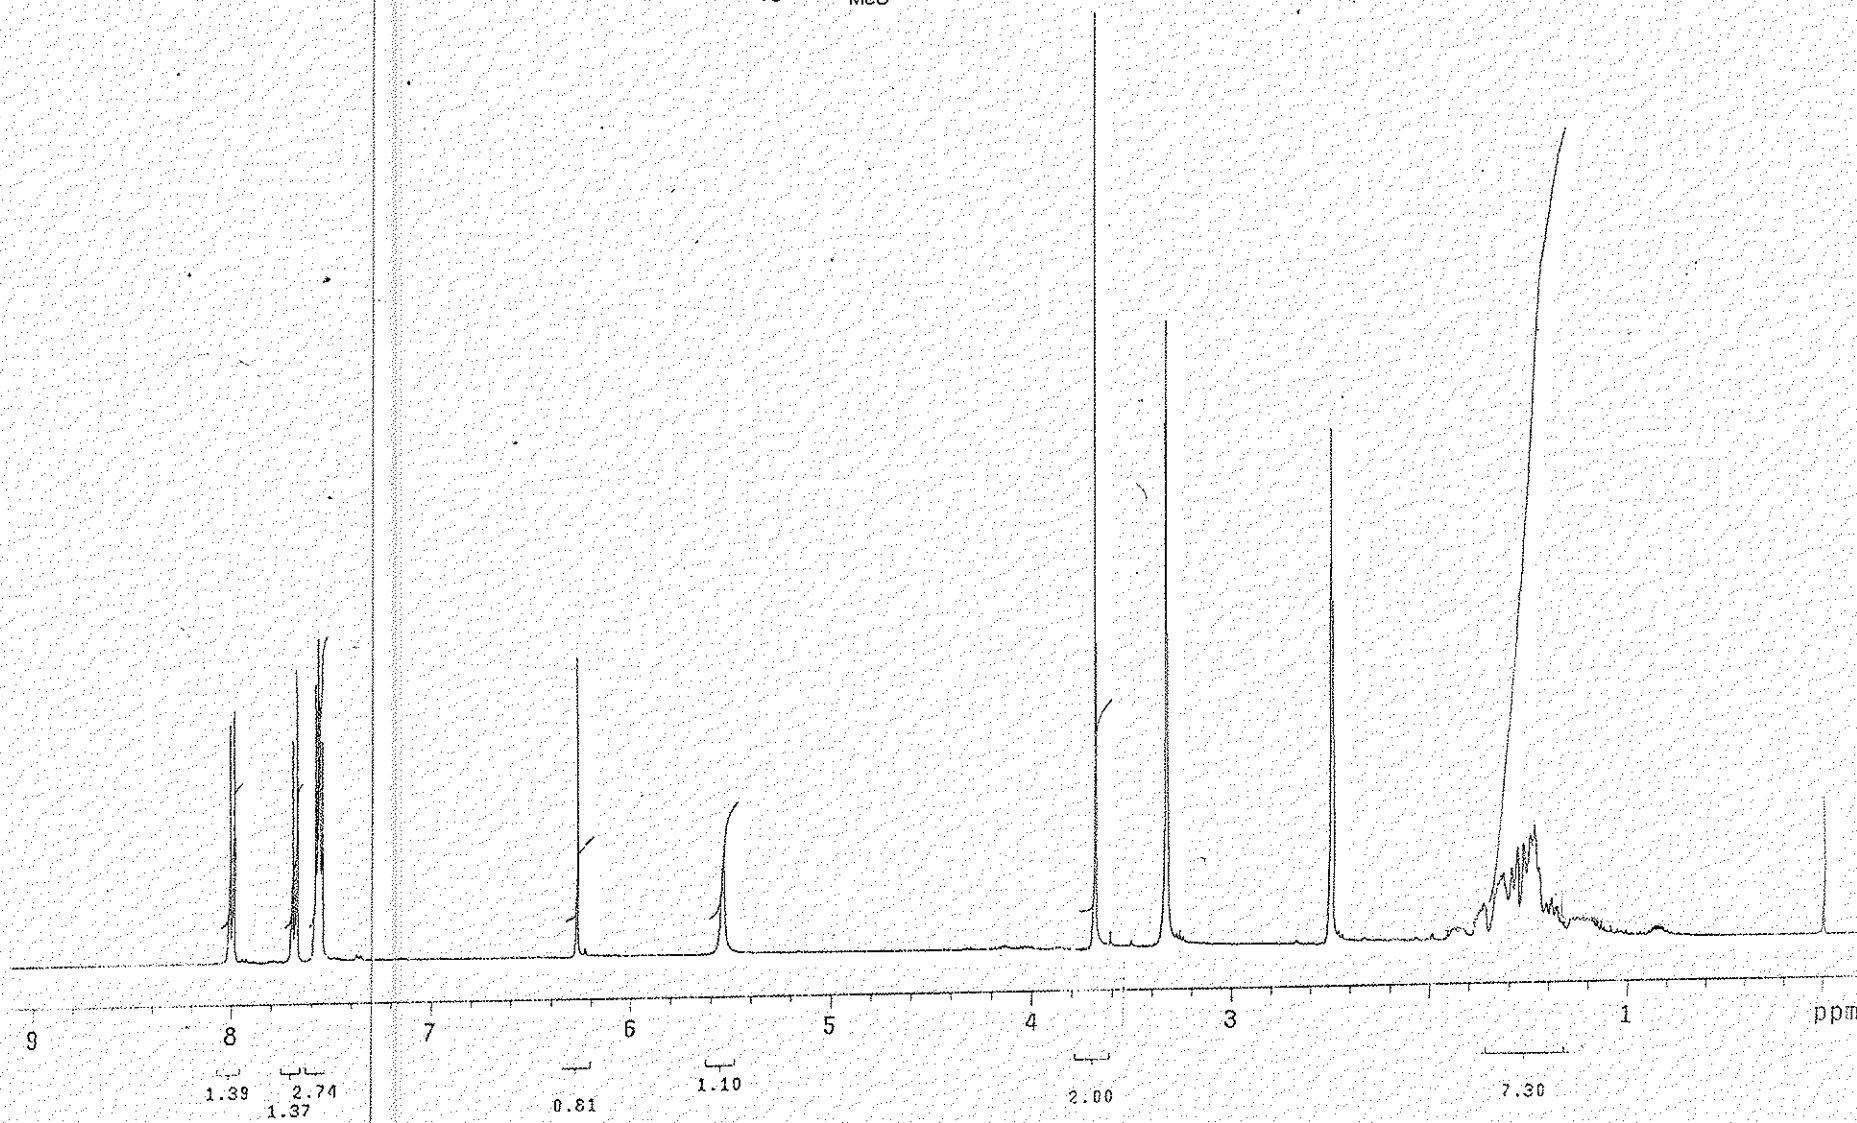

86  
20/12

TDC-213 31MAS3  
NMR-400  
AR.No:ME1210/1673  
Analyst:Haribabu.R  
Date: 17 th Dec. 2010

in DMSO

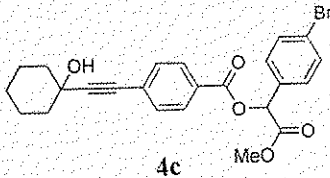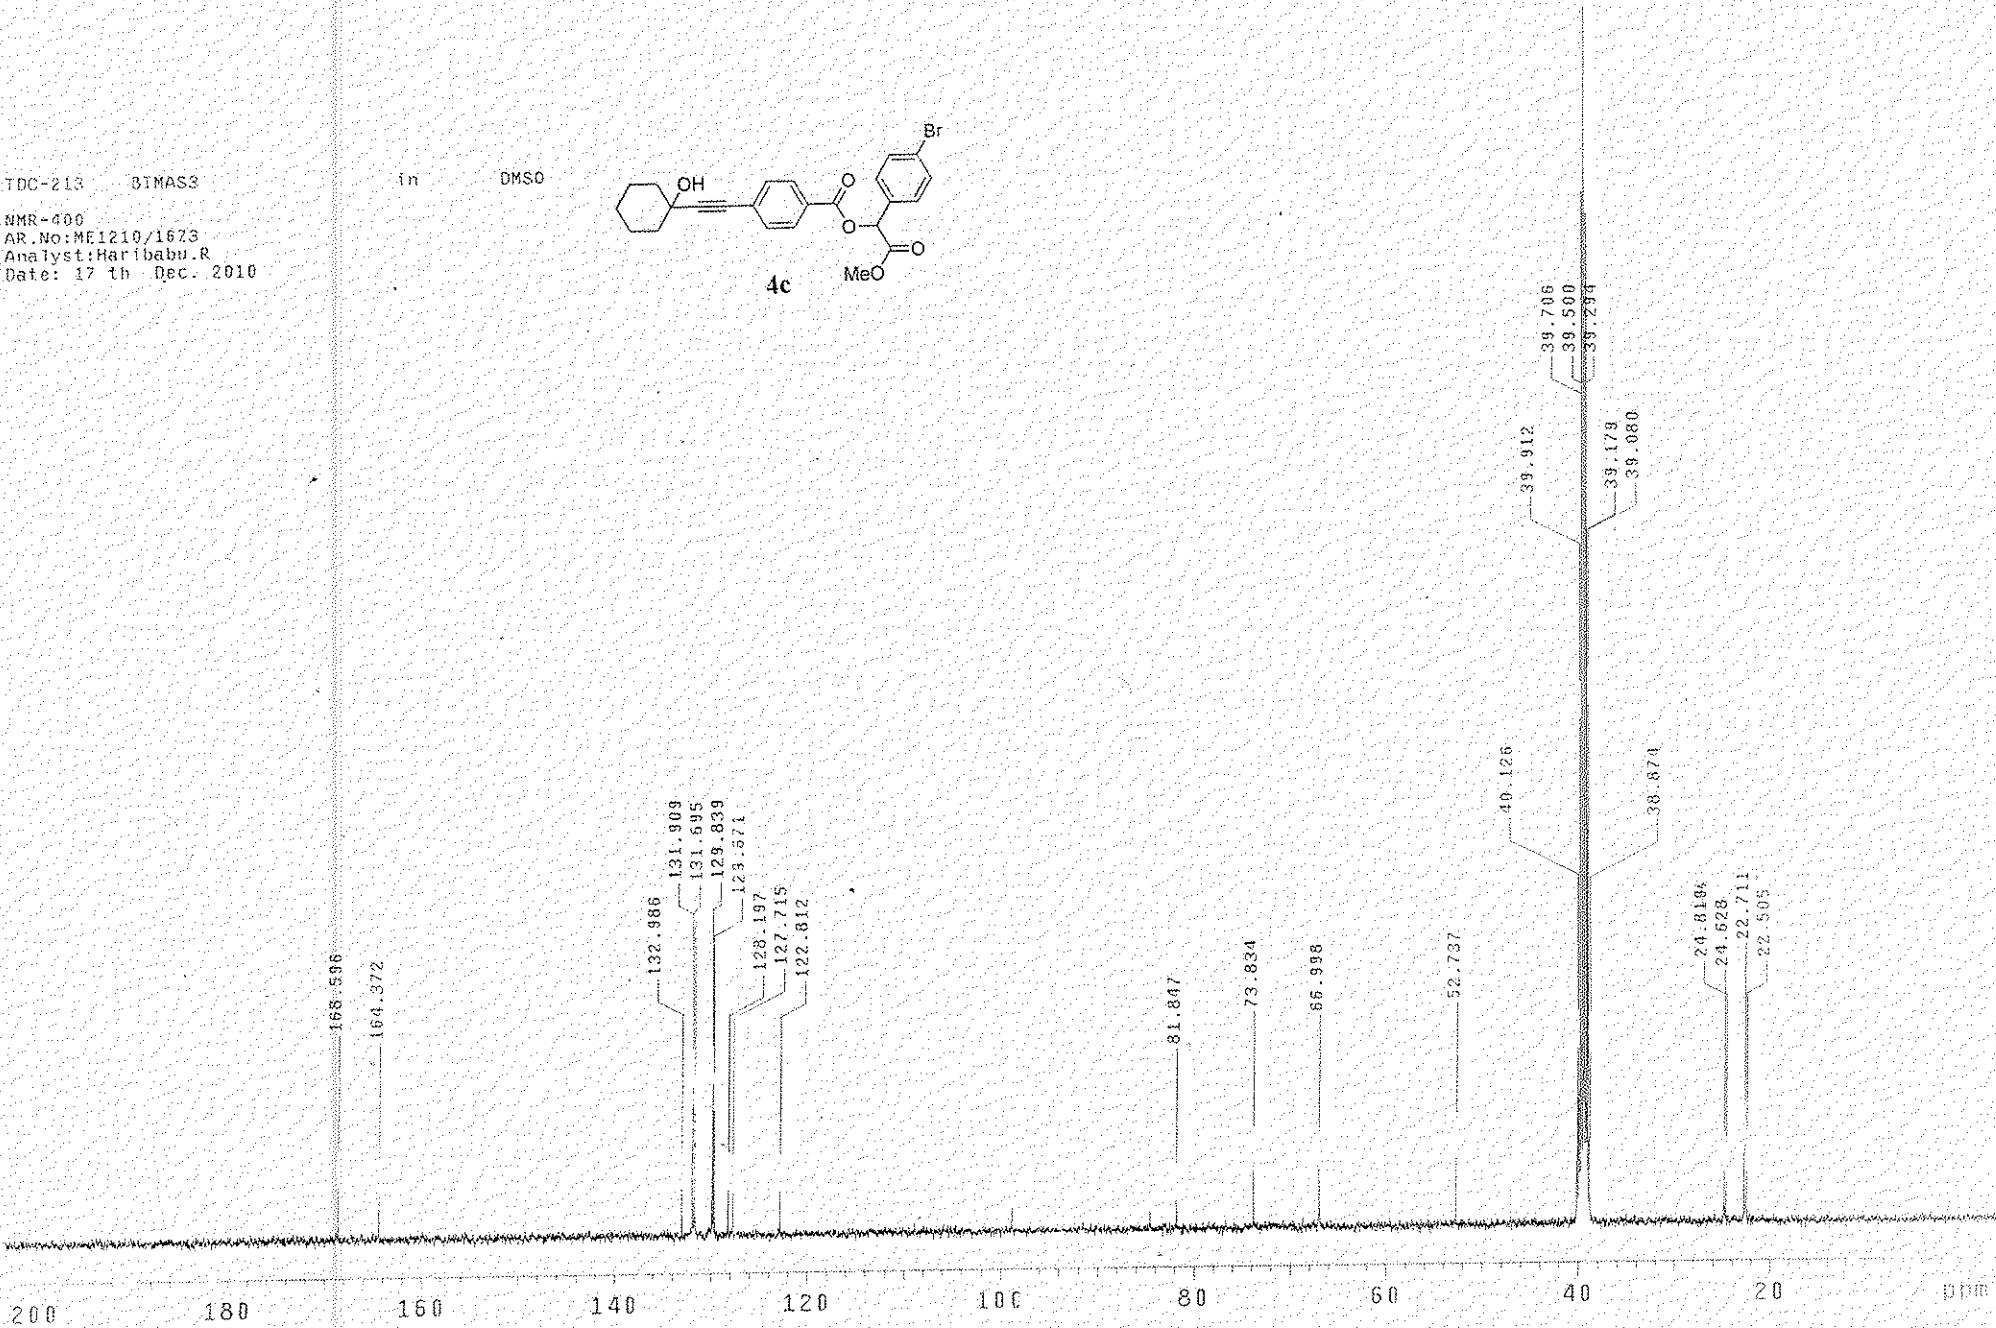

13/12/10

**BIMAS3**

UT1210\_143 17 (0.325) Cm (17:23-86:95)

1: TOF MS ES+  
1.79e3

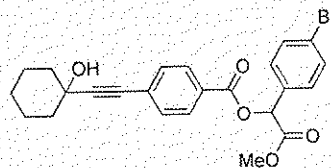

**4c**

BIMAS3; TDC-213  
A.R.No.UT1210\143  
Kaviraj

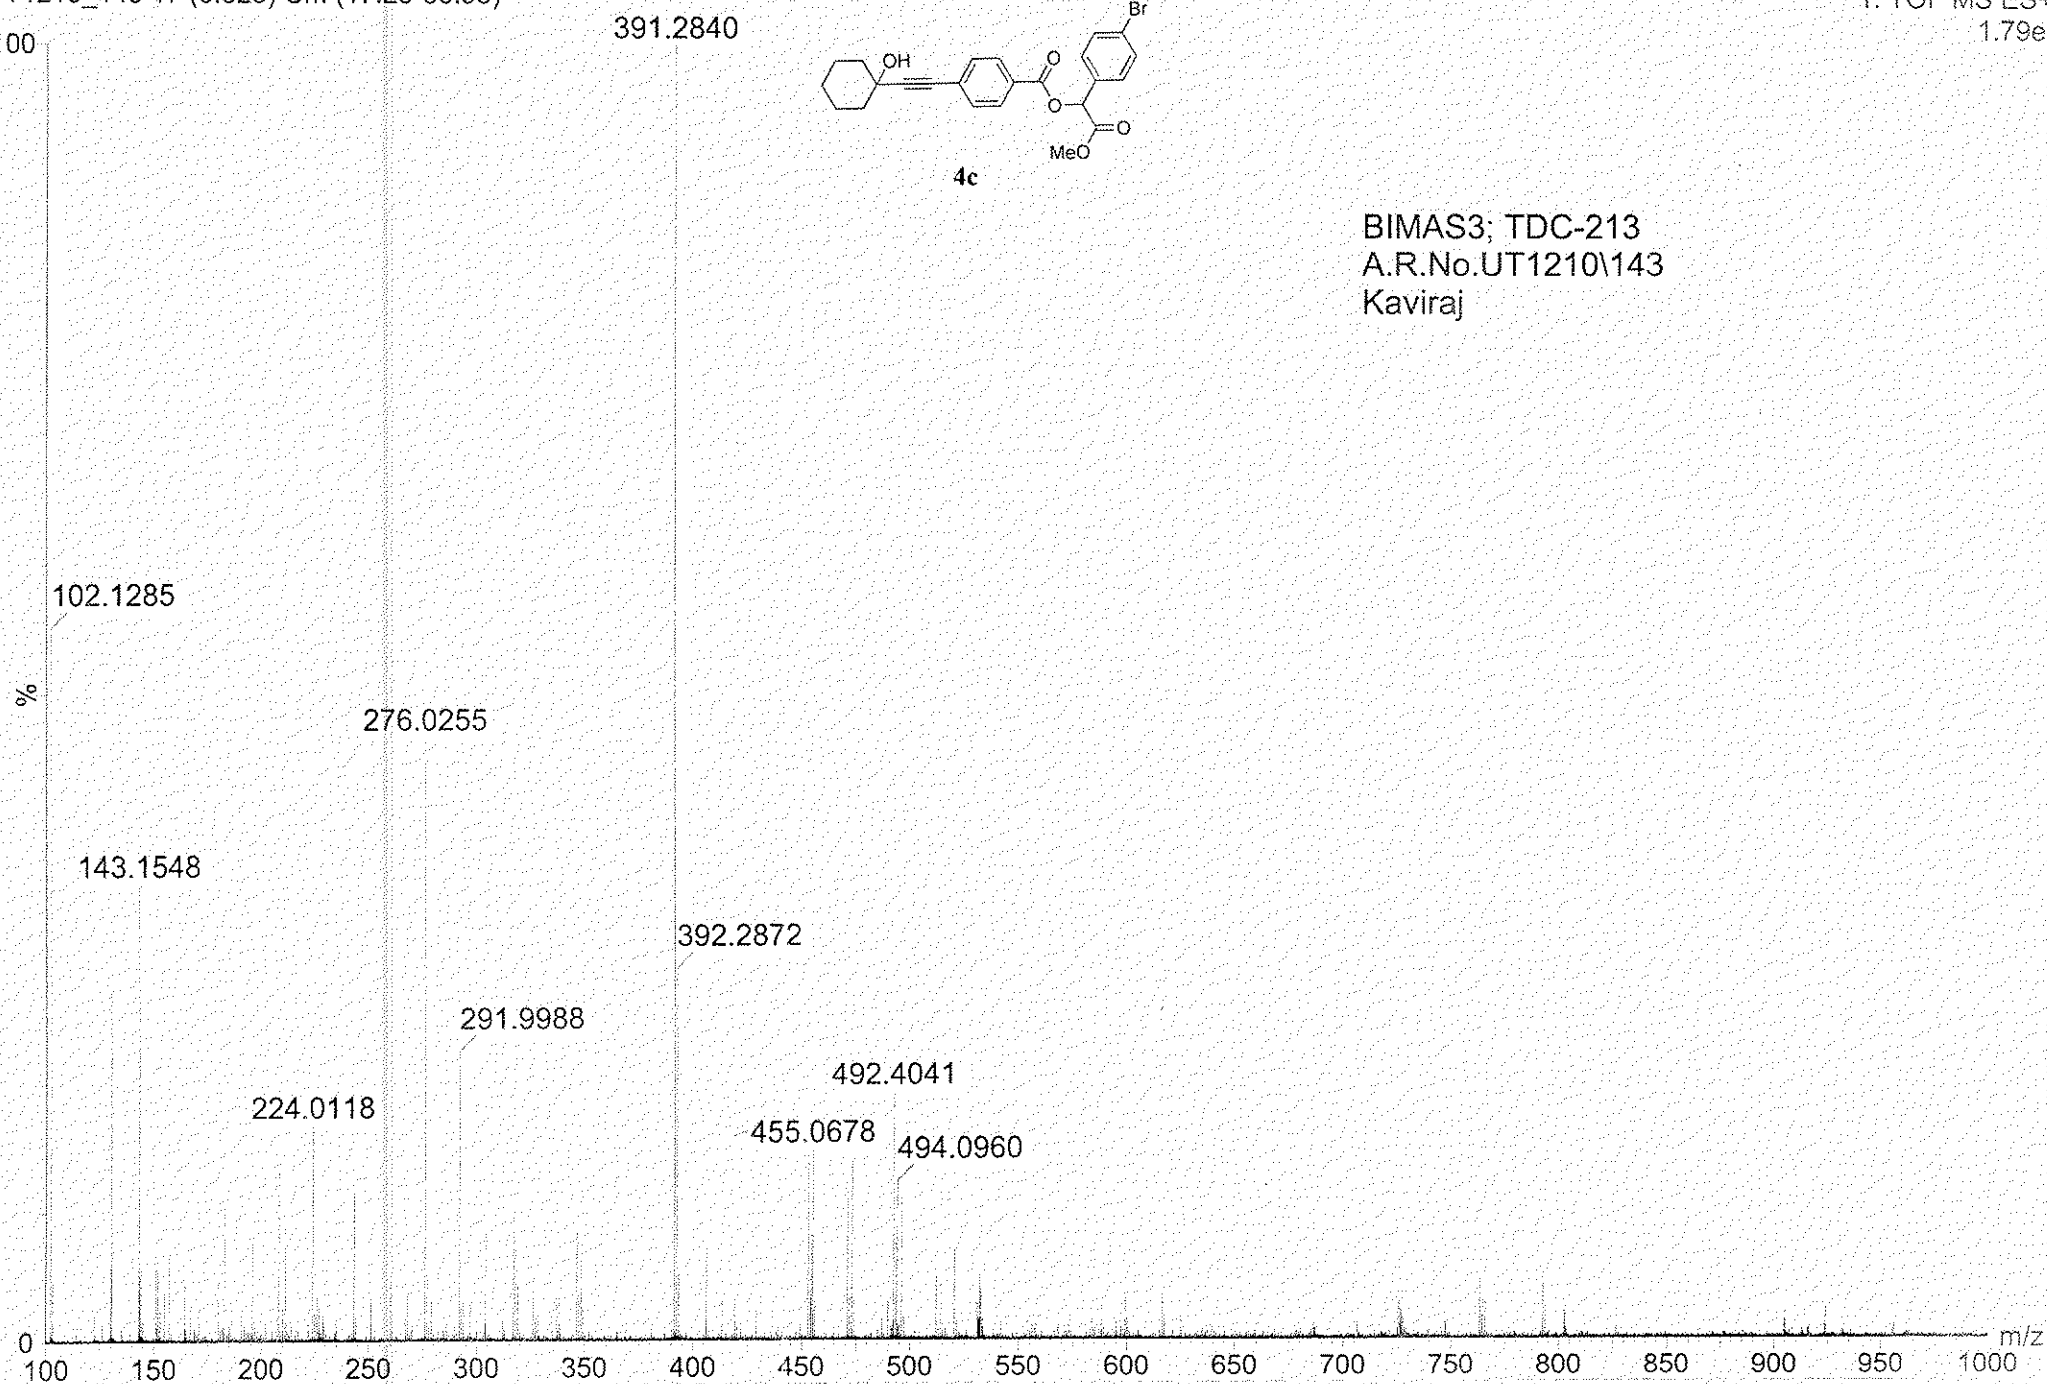

## Elemental Composition Report

### Single Mass Analysis

Tolerance = 10.0 PPM / DBE: min = -1.0, max = 80.0

Element prediction: Off

Number of isotope peaks used for i-FIT = 3

Monoisotopic Mass, Even Electron Ions

85 formula(e) evaluated with 2 results within limits (up to 4 best isotopic matches for each mass)

Elements Used:

C: 0-40 H: 0-55 O: 0-8 Br: 0-1

BIMAS3

UT1210\_143 17 (0.325) Cm (17:23-86:95)

1: TOF MS ES+  
3.43e+002

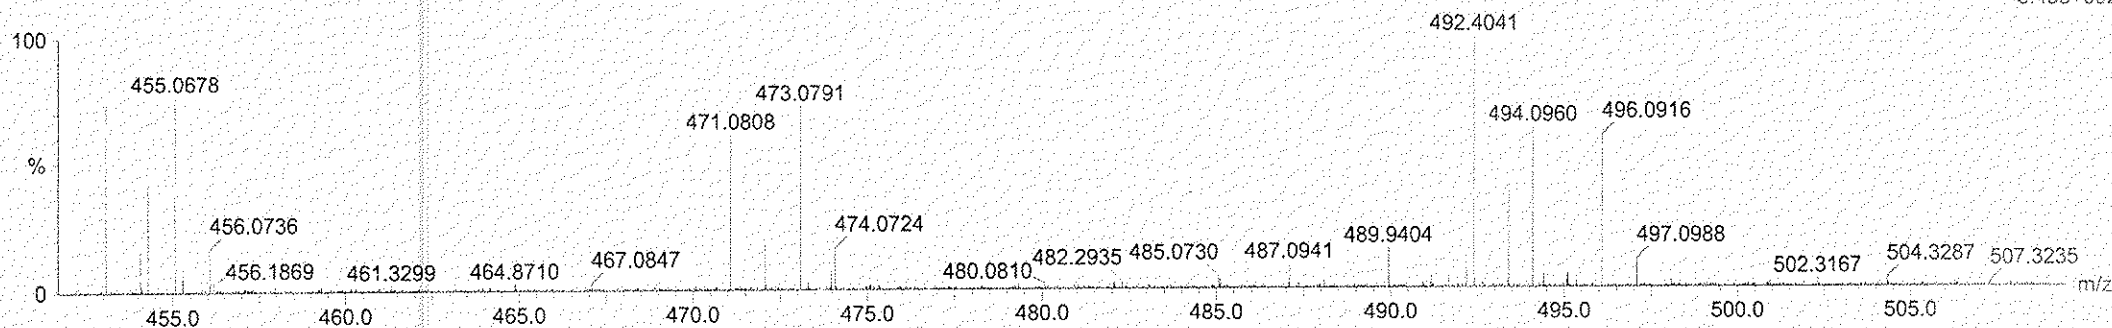

Minimum: -1.0  
Maximum: 5.0 10.0 80.0

| Mass     | Calc. Mass | mDa  | PPM  | DBE  | i-FIT | Formula       |
|----------|------------|------|------|------|-------|---------------|
| 471.0808 | 471.0807   | 0.1  | 0.2  | 12.5 | 1.3   | C24 H24 O5 Br |
|          | 471.0810   | -0.2 | -0.4 | 32.5 | 113.3 | C37 H11 O     |



TDC-213 ABIMAS5 1n DMSO

NMR-400  
AR.No:ME0111/1093  
Analyst:Haribabu.R  
Date: 12 th Jan. 2011

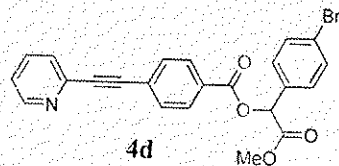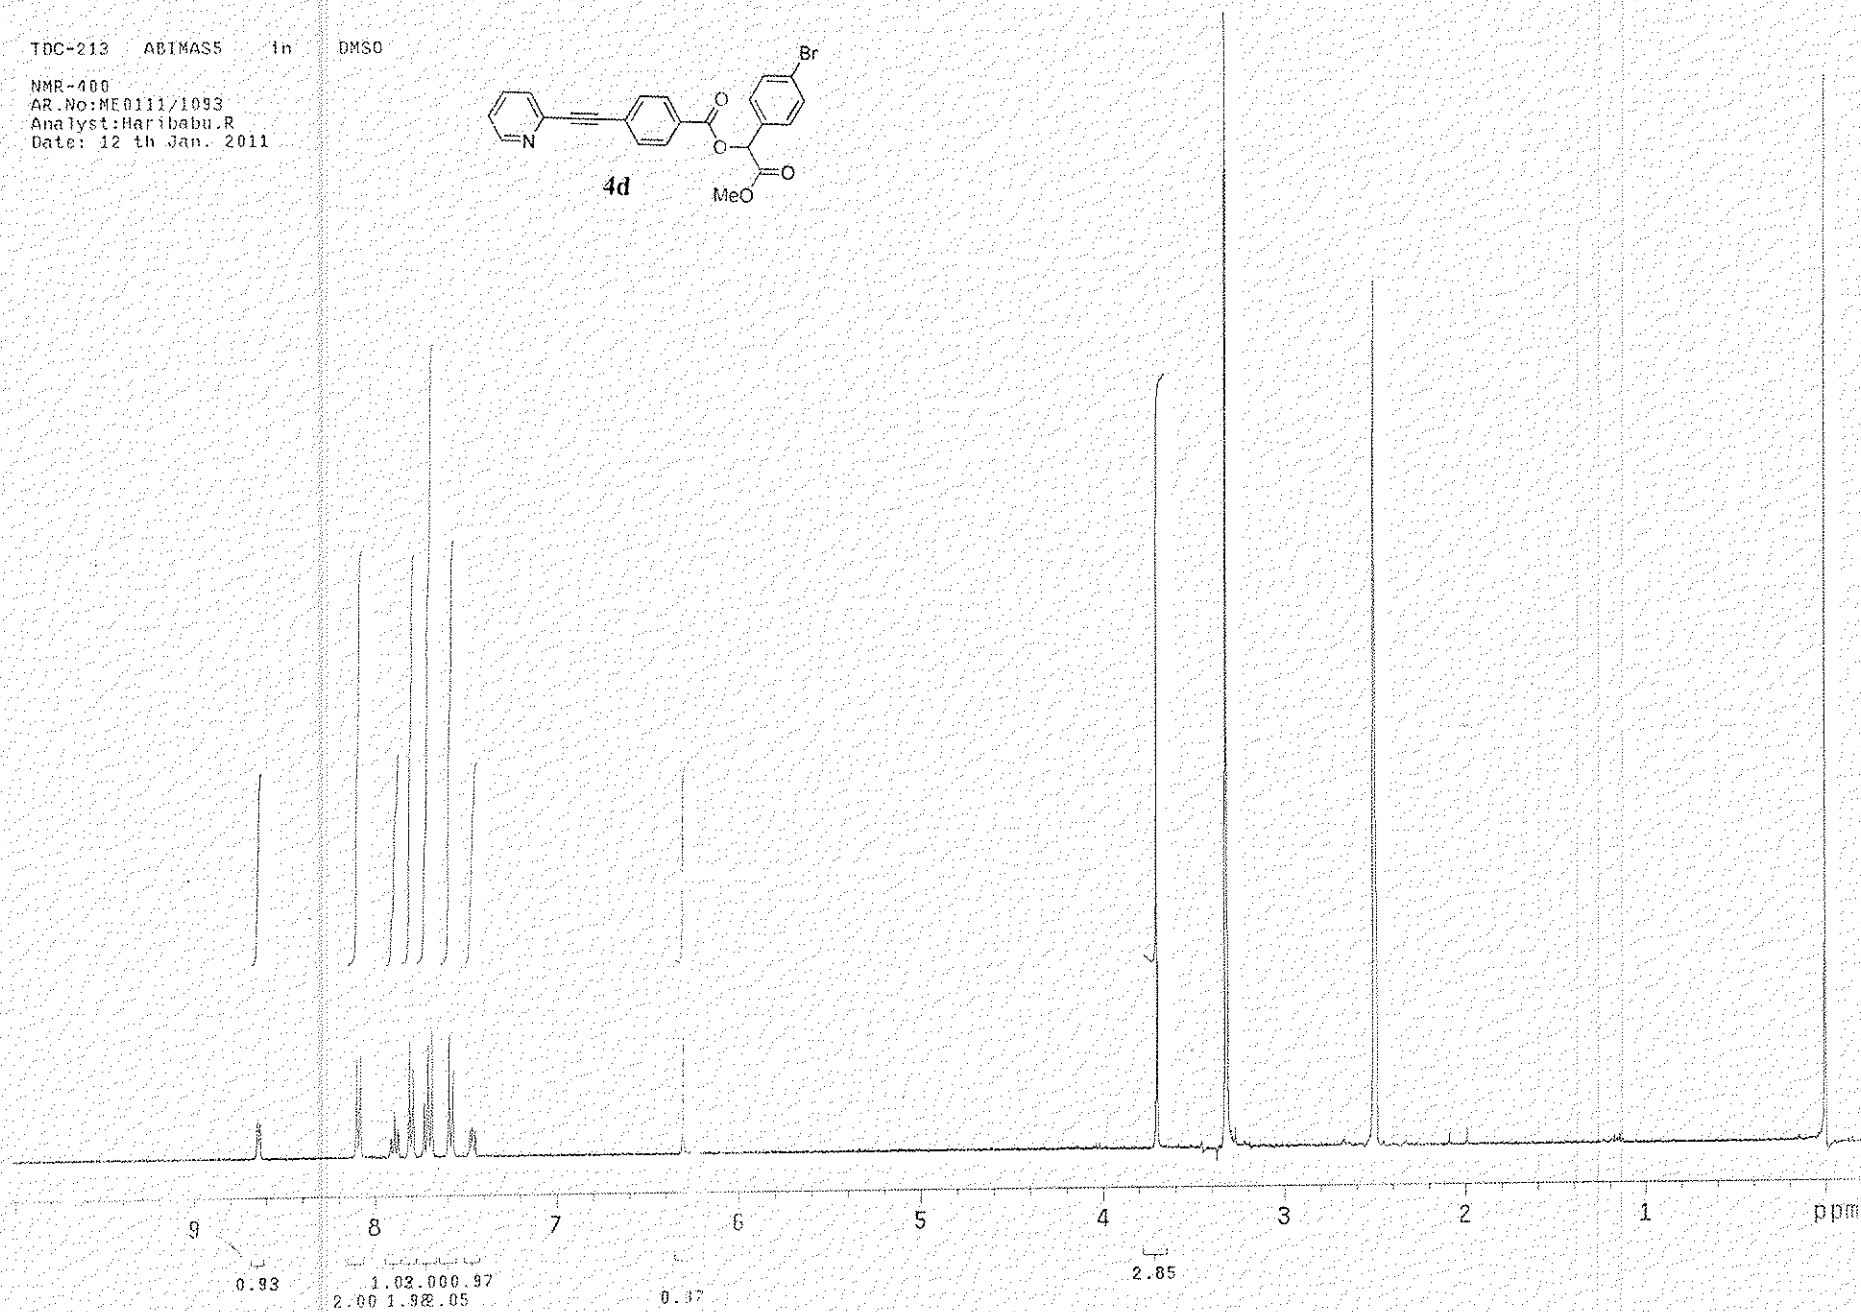



ha

TDC-213      BIMS5  
NMR-400  
AR.No:ME0111/2601  
Analyst: Ganesh  
Date: 28th Jan. 2011

in DMSO

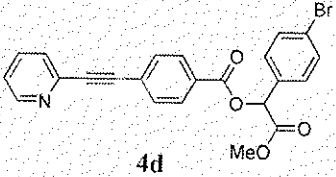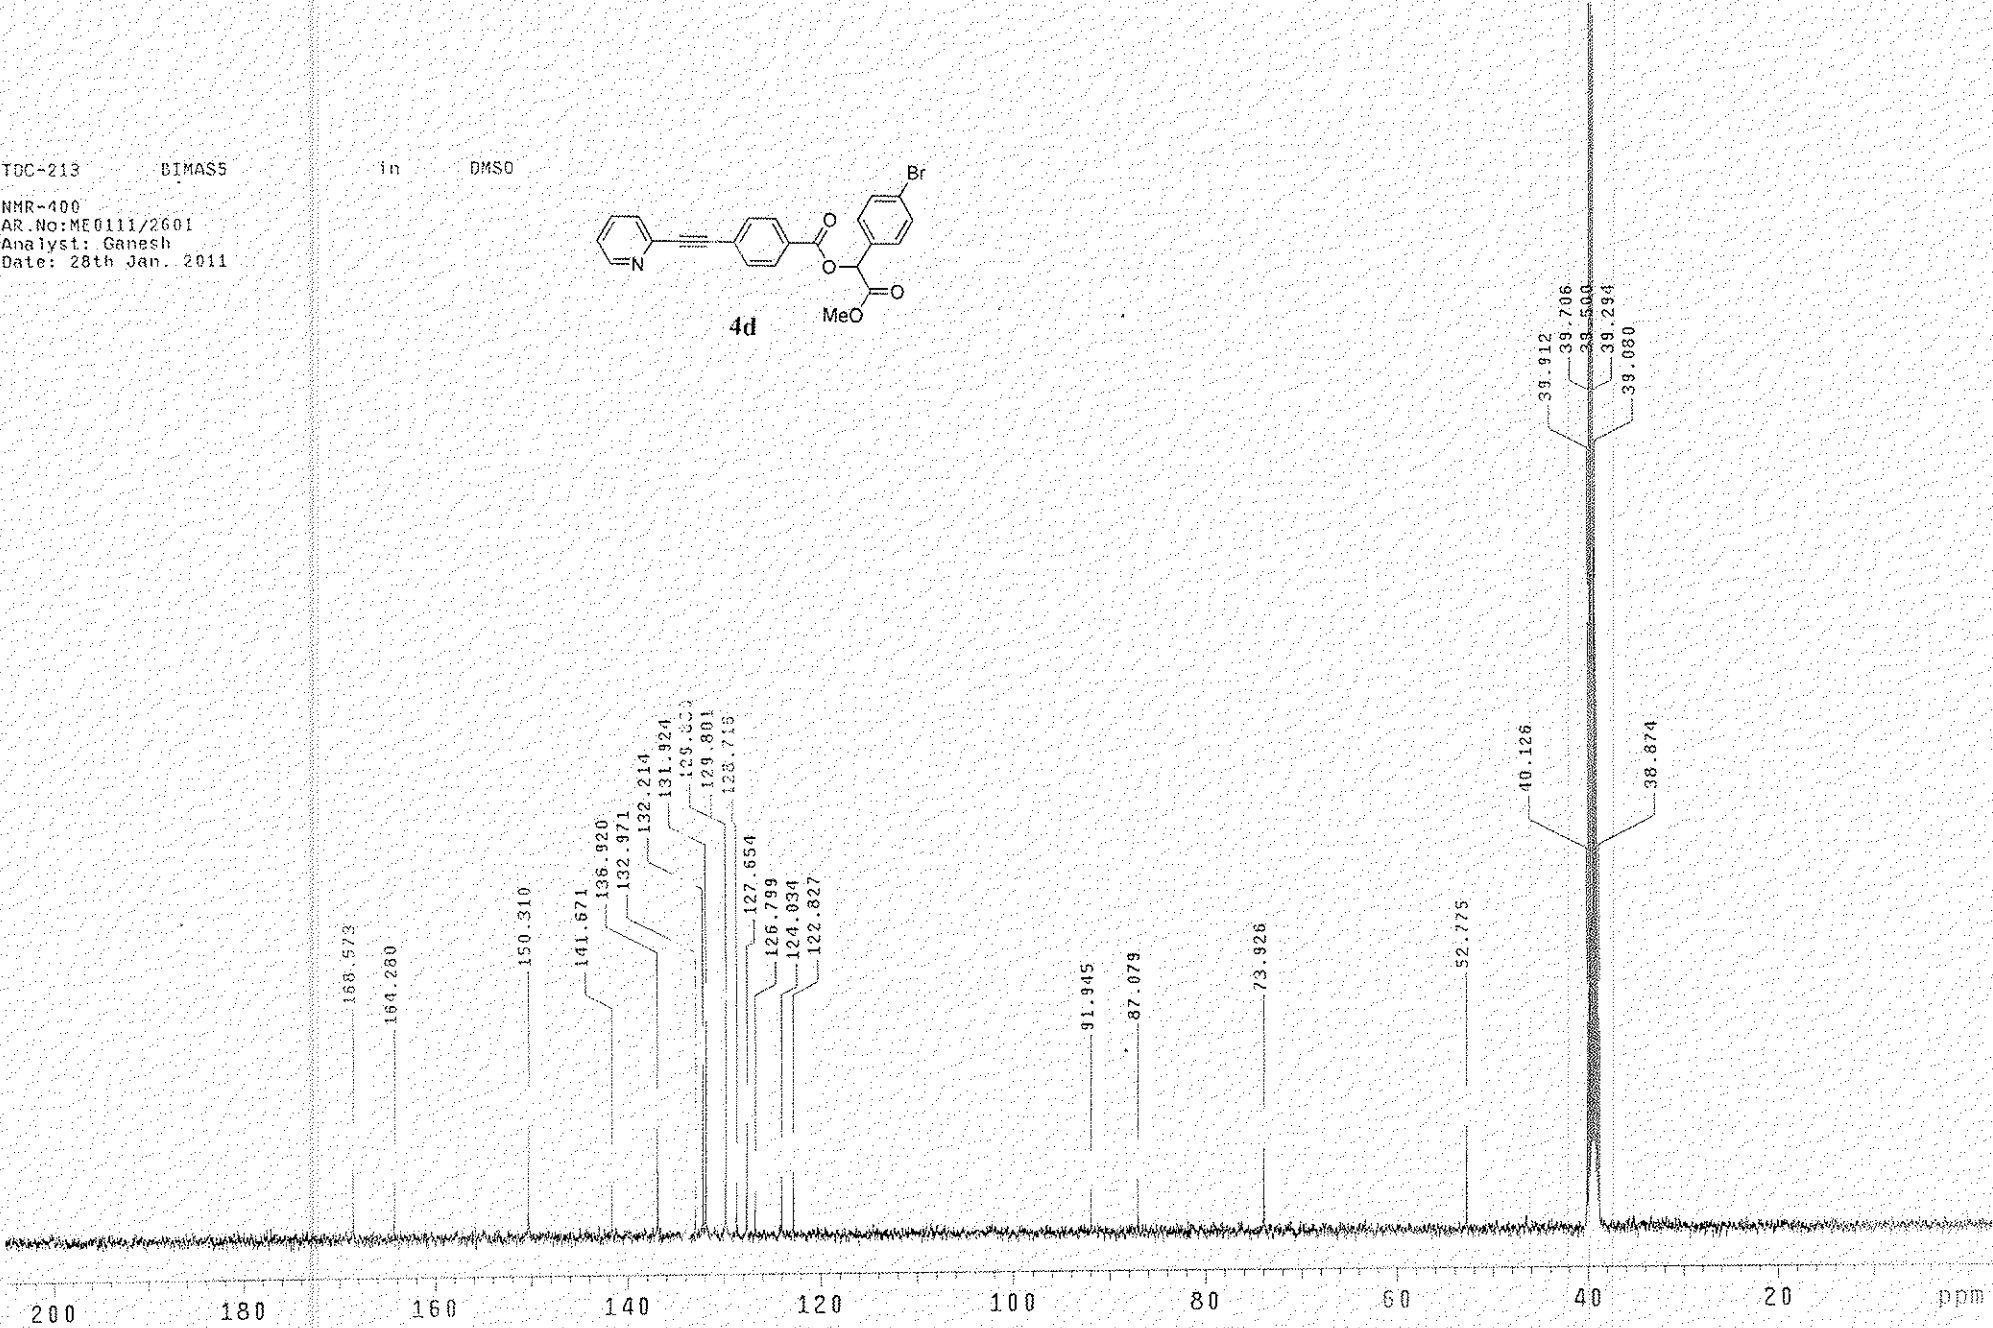

BIMAS5

UT0111\_197 44 (0.815) Cm (44:52-82:103)

1: TOF MS ES+  
3.10e4

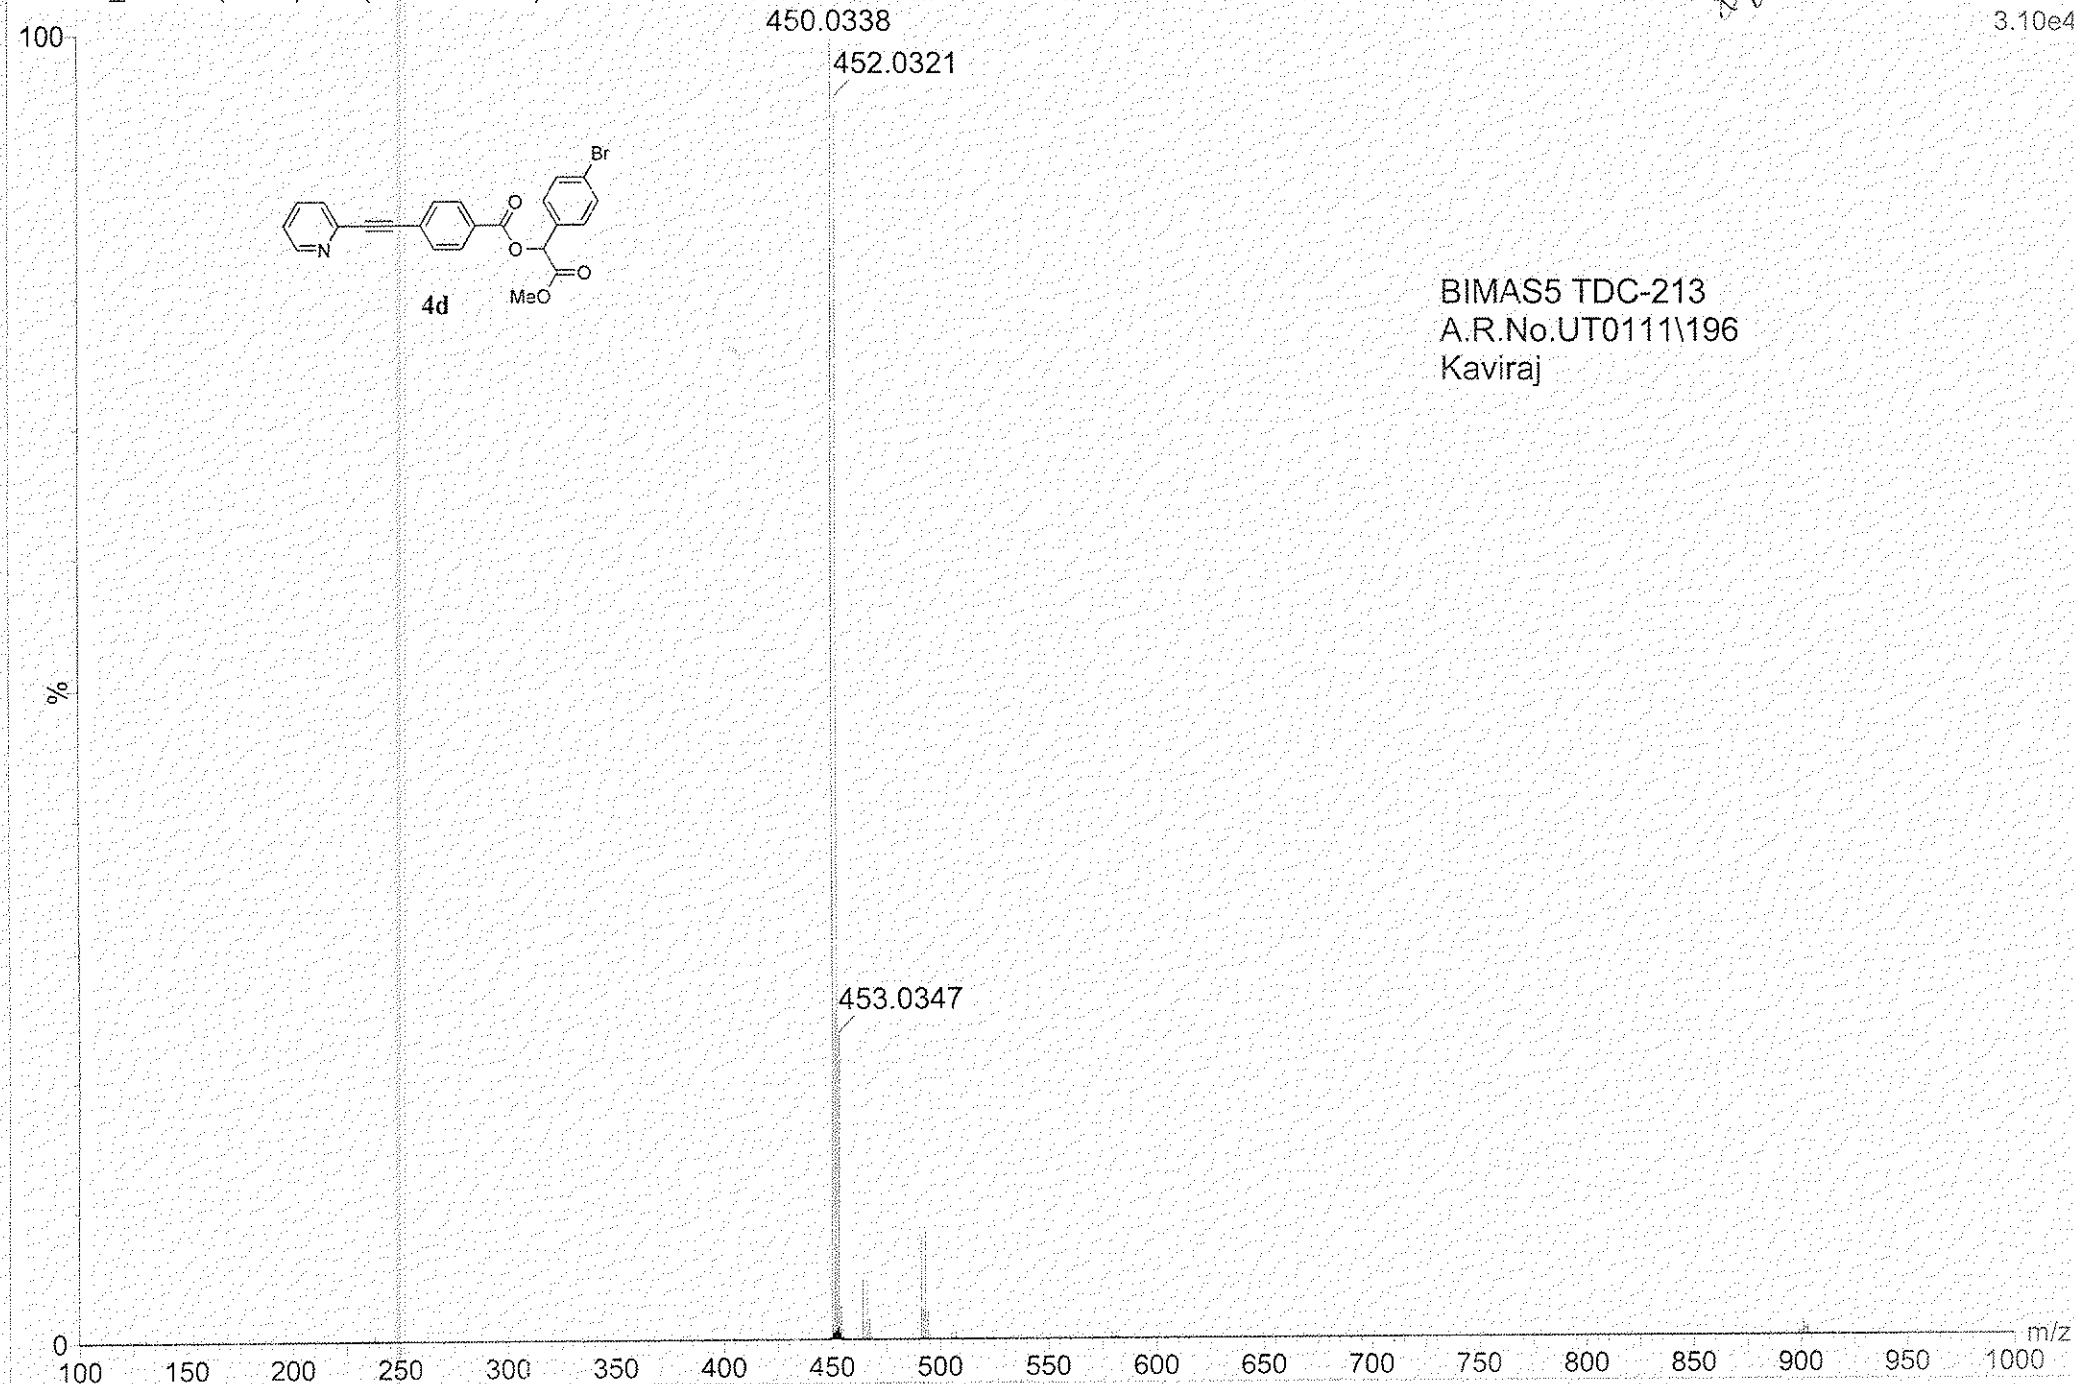

BIMAS5 TDC-213  
A.R.No.UT0111\196  
Kaviraj

## Elemental Composition Report

### Single Mass Analysis

Tolerance = 5.0 PPM / DBE: min = -1.0, max = 80.0

Element prediction: Off

Number of isotope peaks used for i-FIT = 3

Monoisotopic Mass, Even Electron Ions

236 formula(e) evaluated with 1 results within limits (up to 4 best isotopic matches for each mass)

Elements Used:

C: 0-35 H: 0-30 N: 0-4 O: 0-8 Br: 0-1

BIMAS5

UT0111\_197 44 (0.815) Cm (44.52-82:103)

1: TOF MS ES+  
3.10e+004

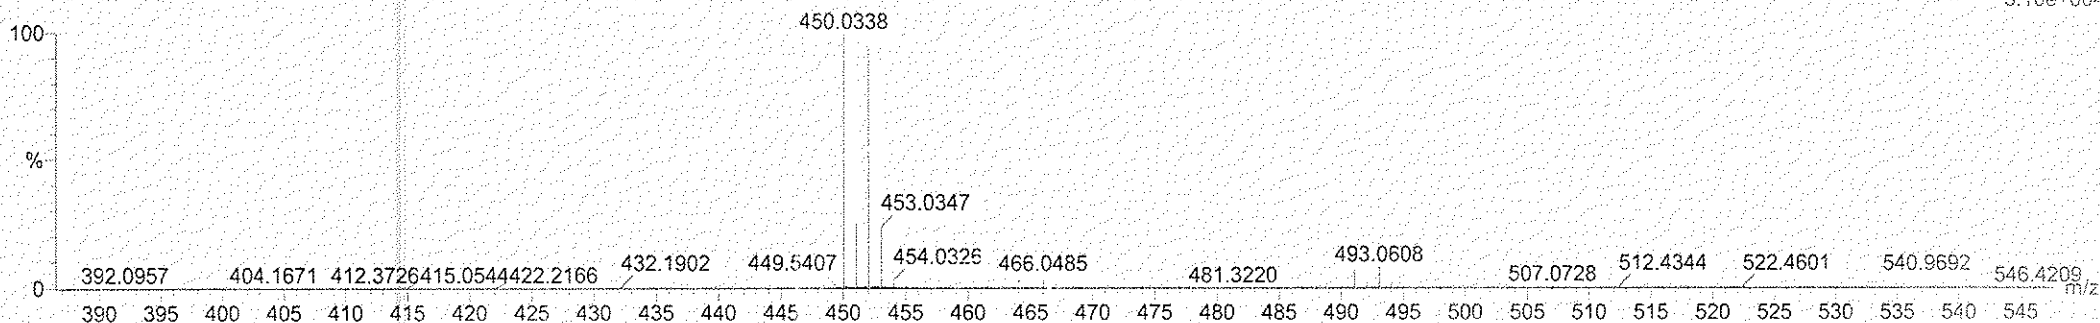

Minimum: -1.0  
Maximum: 5.0 5.0 80.0

| Mass     | Calc. Mass | mDa  | PPM  | DBE  | i-FIT | Formula         |
|----------|------------|------|------|------|-------|-----------------|
| 450.0338 | 450.0341   | -0.3 | -0.7 | 15.5 | 27.5  | C23 H17 N O4 Br |

19/7

TDC-213 BAS1

in DMSO

NMR-400

AR.No:ME0910/1539

Analyst:Haribabu.R

Date:27th Sept 2010

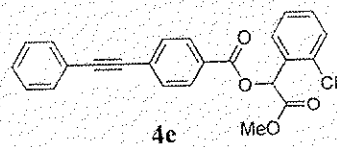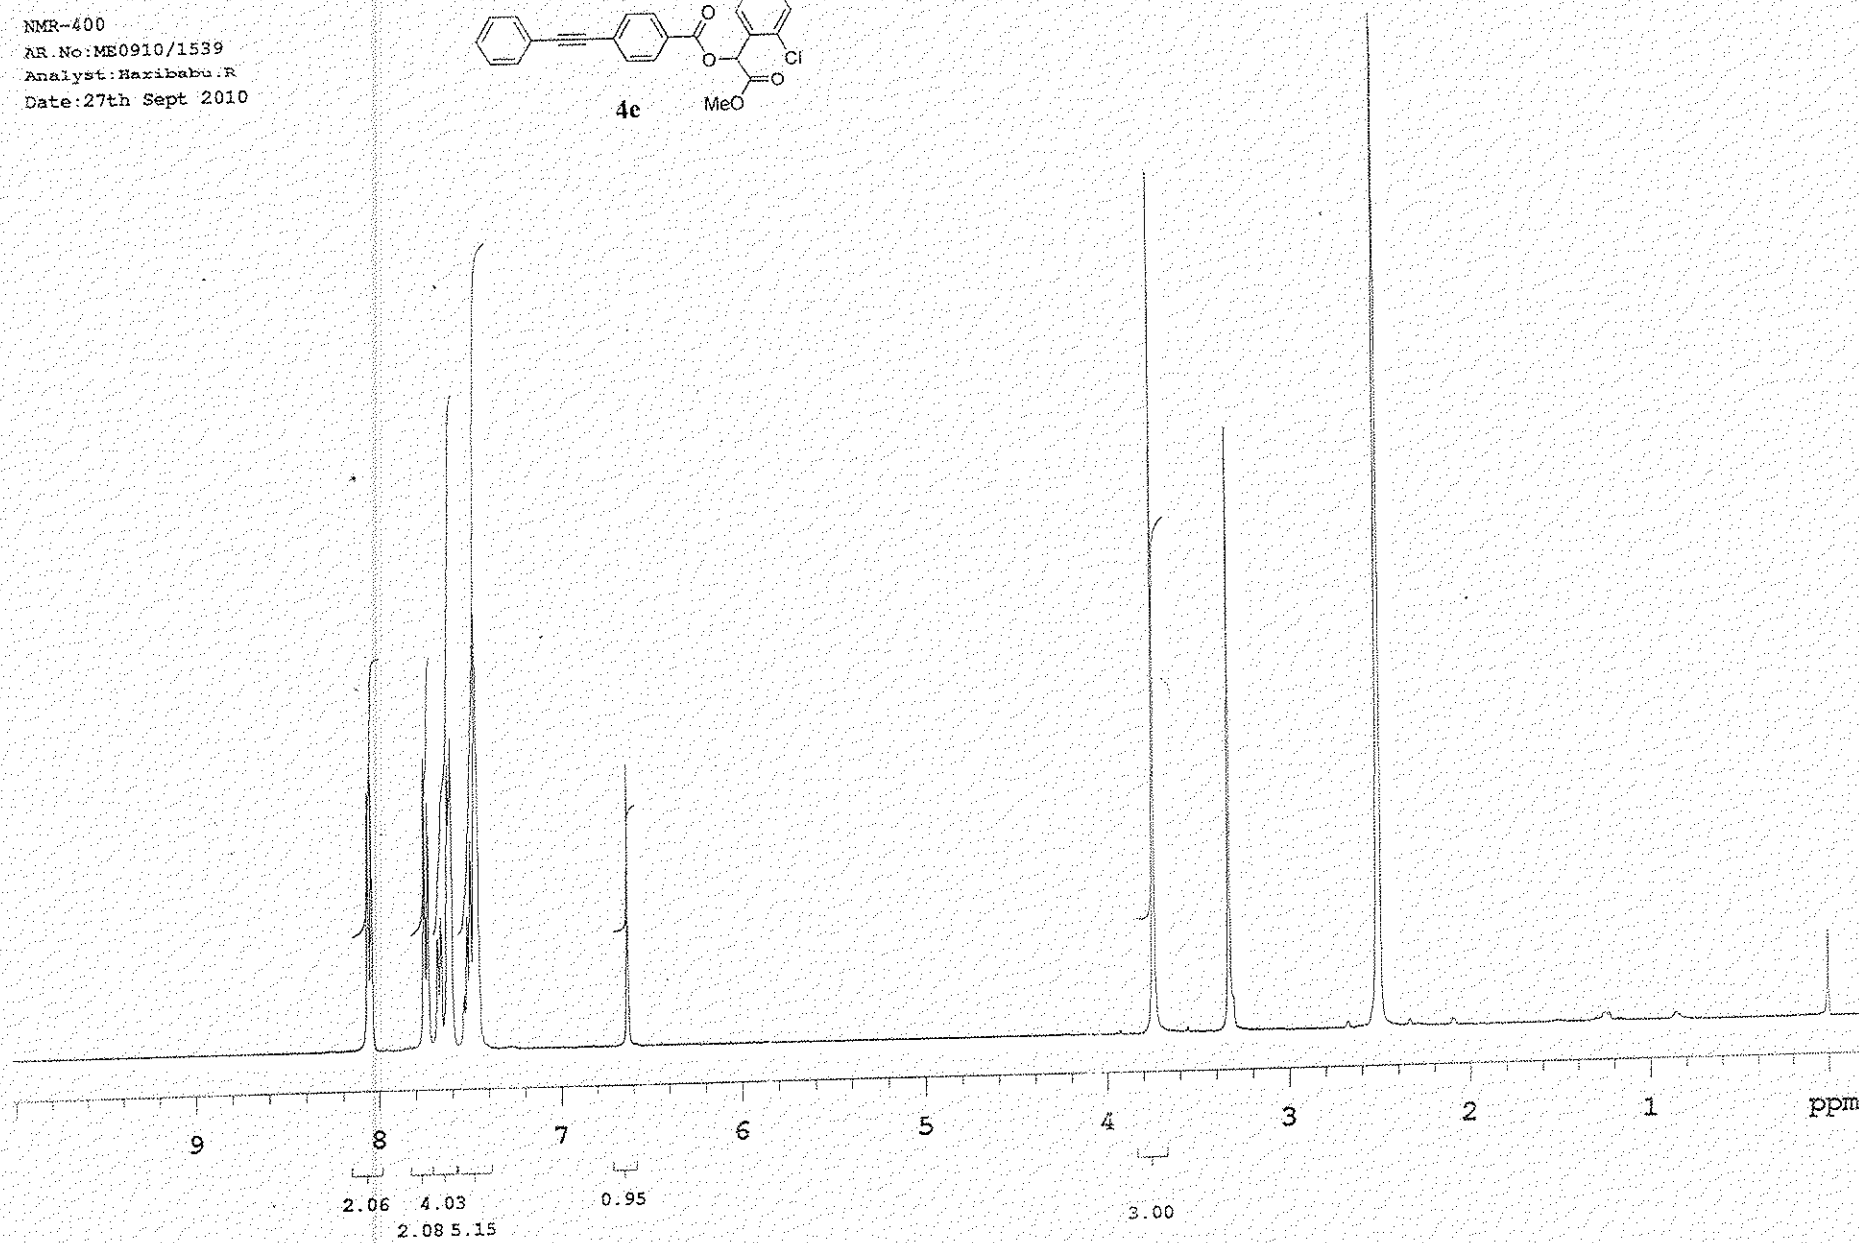



BAS1 in DMSO  
TDC-213  
AR NO:GE0910/50  
Analyst:Haribabu.R  
Date: 29th Sept.2010

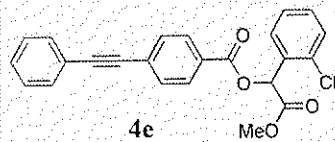

AR&D, Aurigene Discovery Technologies Ltd, Hydera  
Instrument : Gemini 2000 (Varian 200MHz)  
Date & Time : Wed Sep 29 19:37:5 GMT 2010  
Recorded By : Haribabu.R

h  
29/9

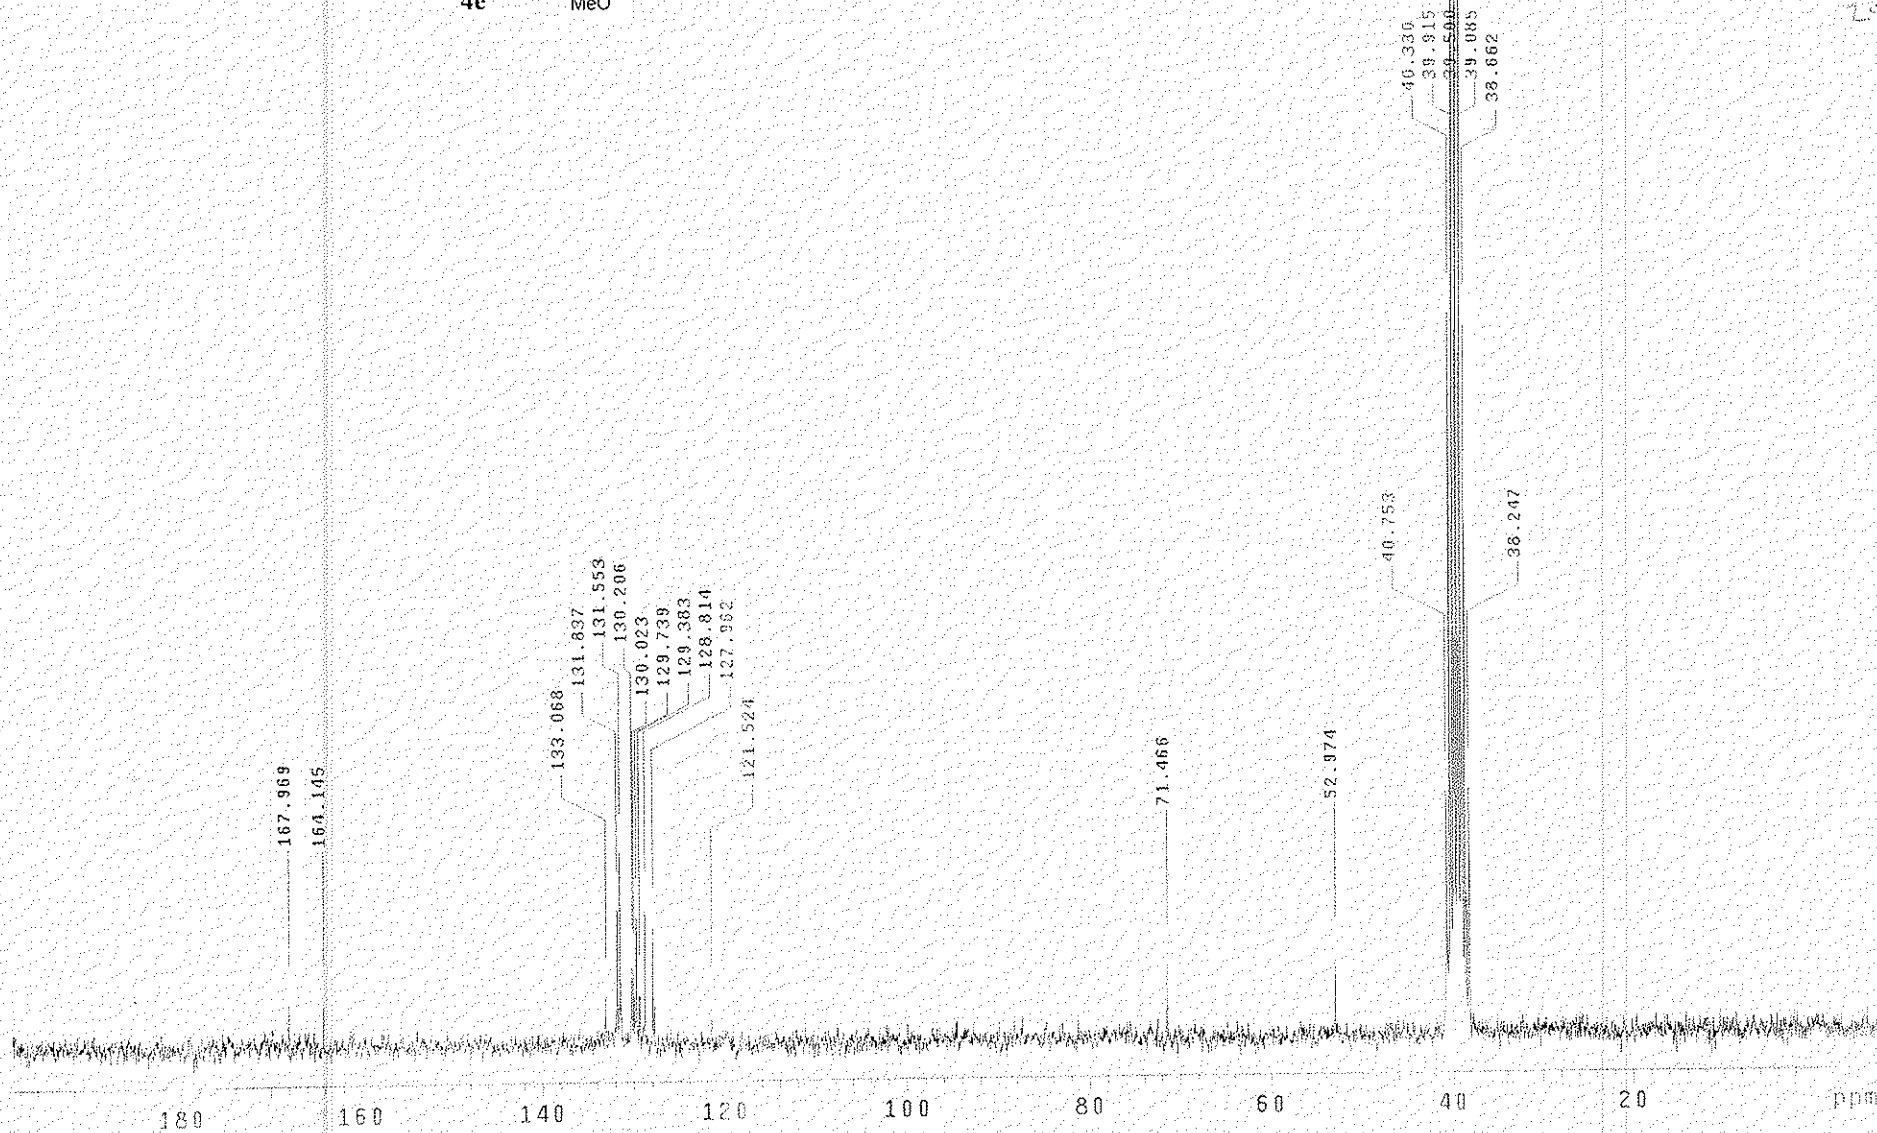



29/10/10

1: TOF MS ES+  
1.32e3

BAS1

UT1010\_198 7 (0.131) Cm (5:20-81:92)

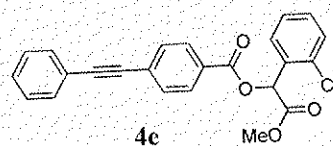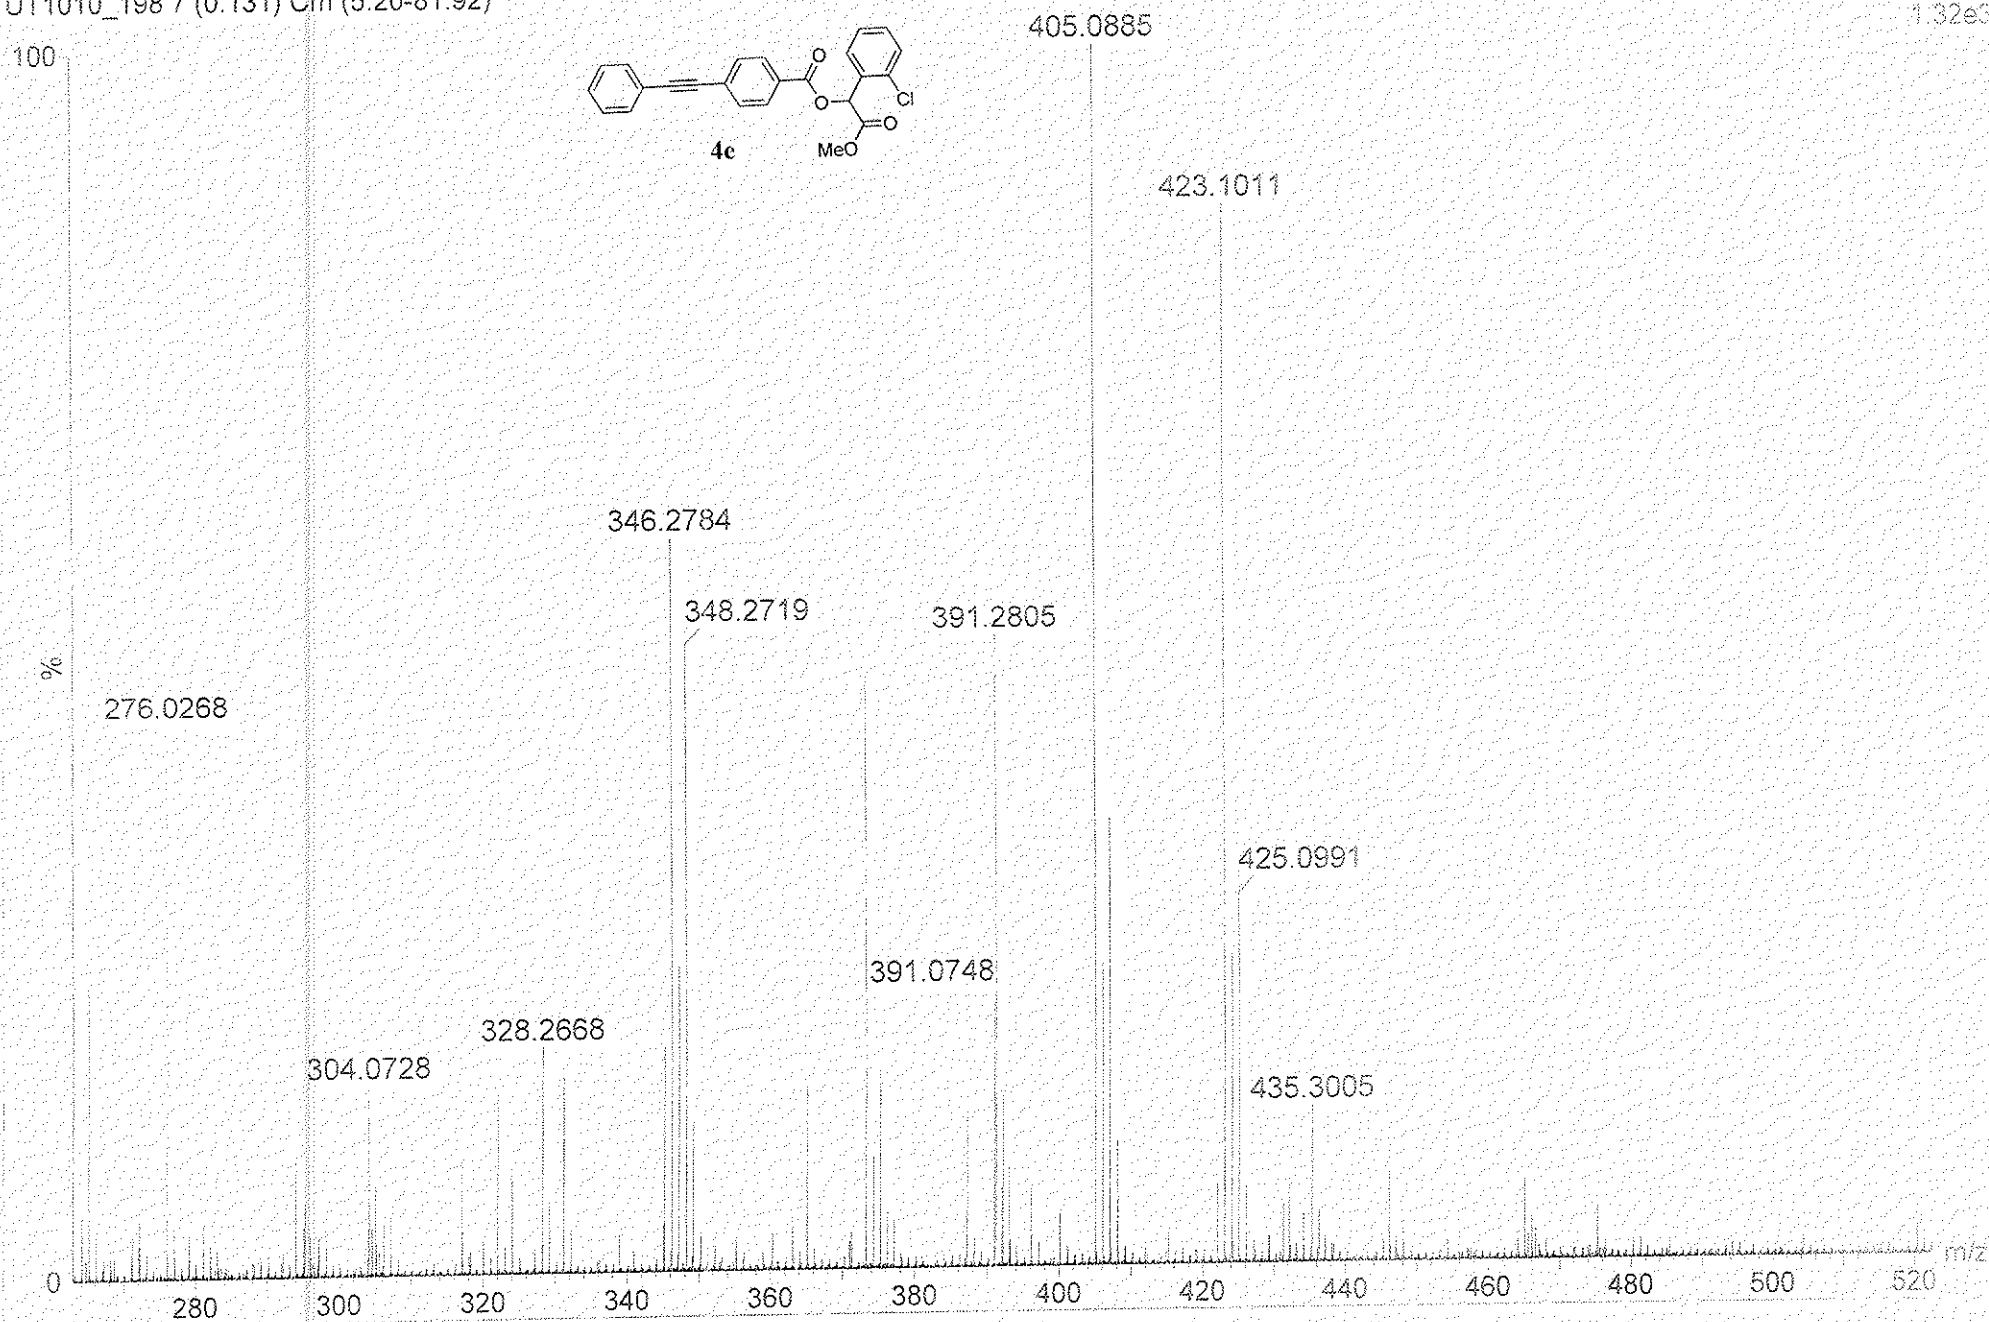

29/10/10

## Elemental Composition Report

### Single Mass Analysis

Tolerance = 5.0 PPM / DBE: min = -1.0, max = 80.0

Element prediction: Off

Number of isotope peaks used for i-FIT = 3

Monoisotopic Mass, Even Electron Ions

120 formula(e) evaluated with 1 results within limits (up to 4 best isotopic matches for each mass)

Elements Used:

C: 0-45 H: 0-70 N: 0-1 O: 0-5 Cl: 0-1

BAS1

UT1010\_198.7 (0.131) Cm (5.20-81.92)

1. TOF MS ES+

1.32e+003

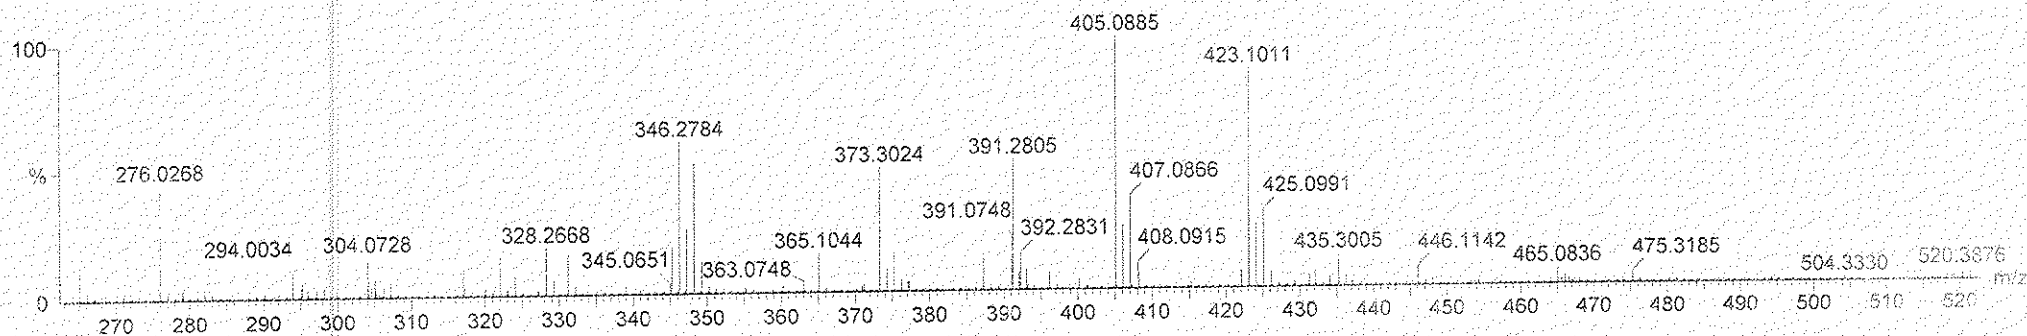

Minimum: -1.0  
Maximum: 5.0 5.0 80.0

| Mass     | Calc. Mass | mDa  | PPM  | DBE  | i-FIT | Formula       |
|----------|------------|------|------|------|-------|---------------|
| 405.0885 | 405.0894   | -0.9 | -2.2 | 15.5 | 1.3   | C24 H18 O4 Cl |

TQC-213 BAS2 in DMSO

NMR-400

AR.No:ME1010/209

Analyst:Haribabu.R

Date: 04 th Oct 2010

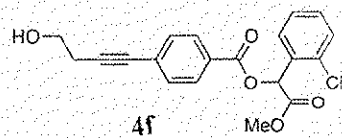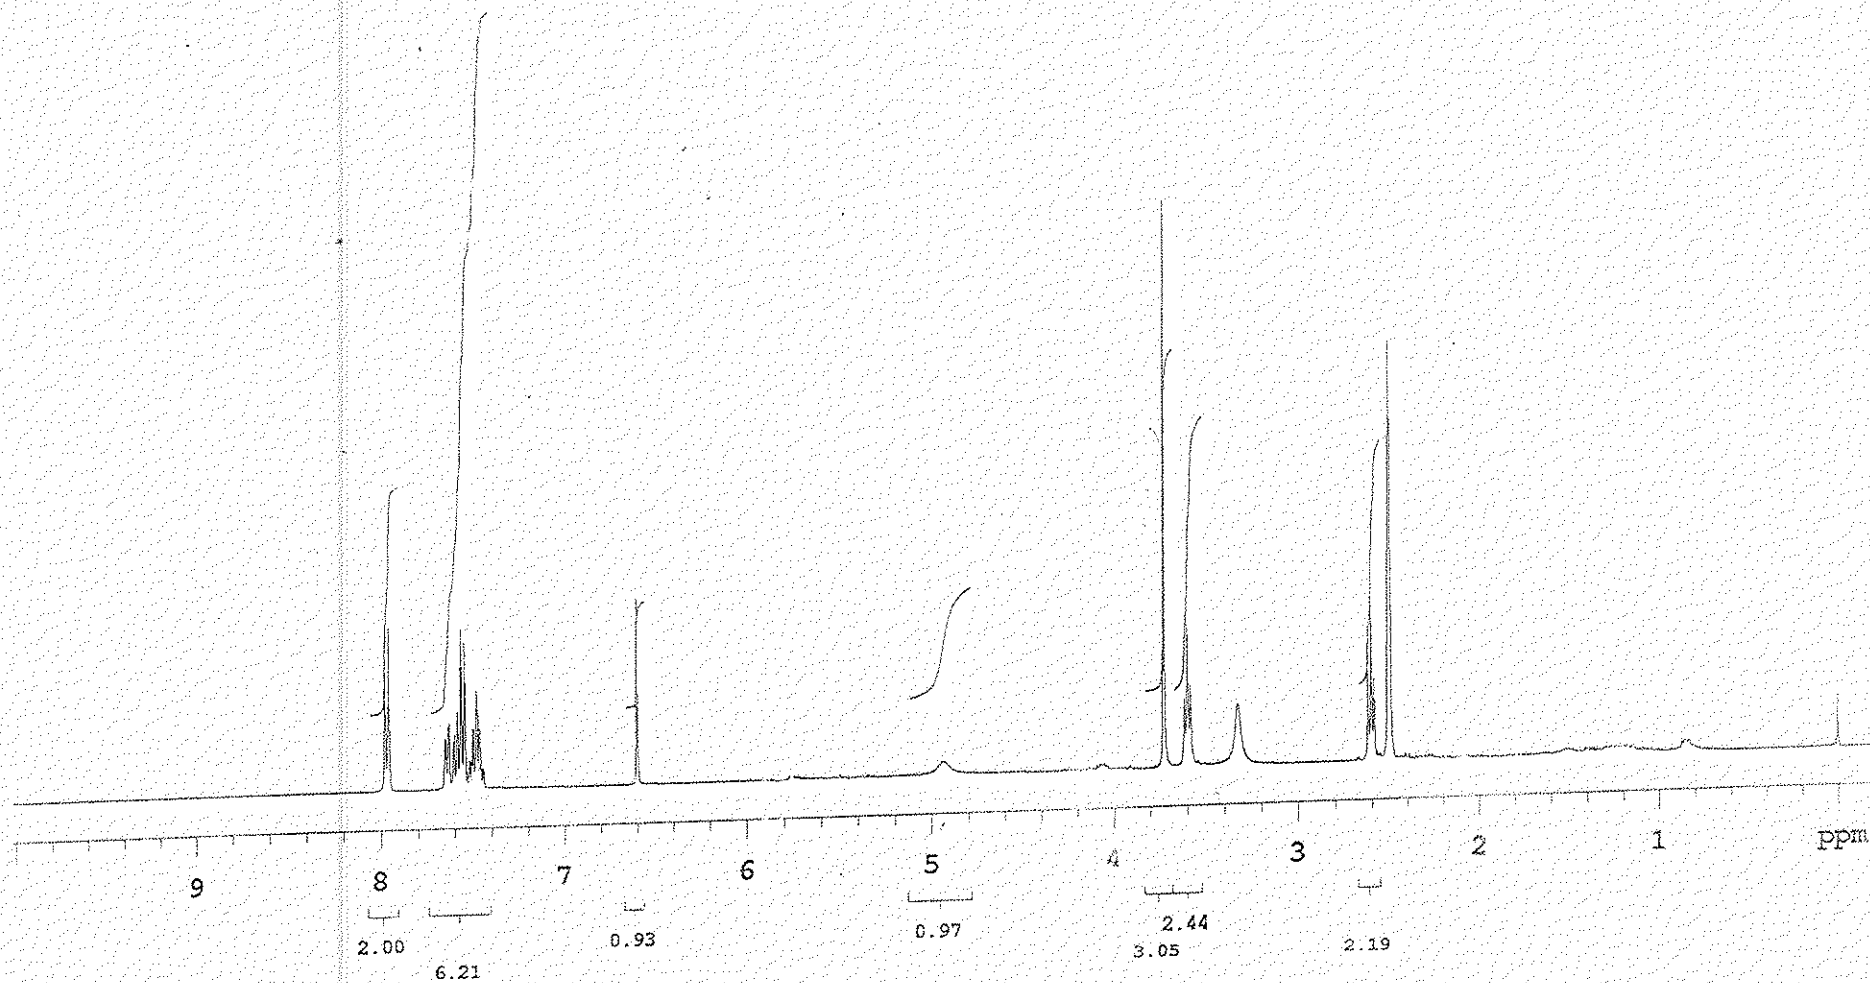

TDC-213 BDS2 in DMSO

NMR-400

AR.No:ME1010/770

Analyst:Haribabu.R

Date: 8th Oct 2010

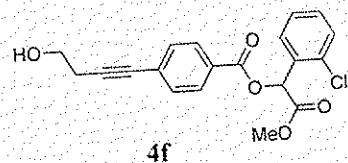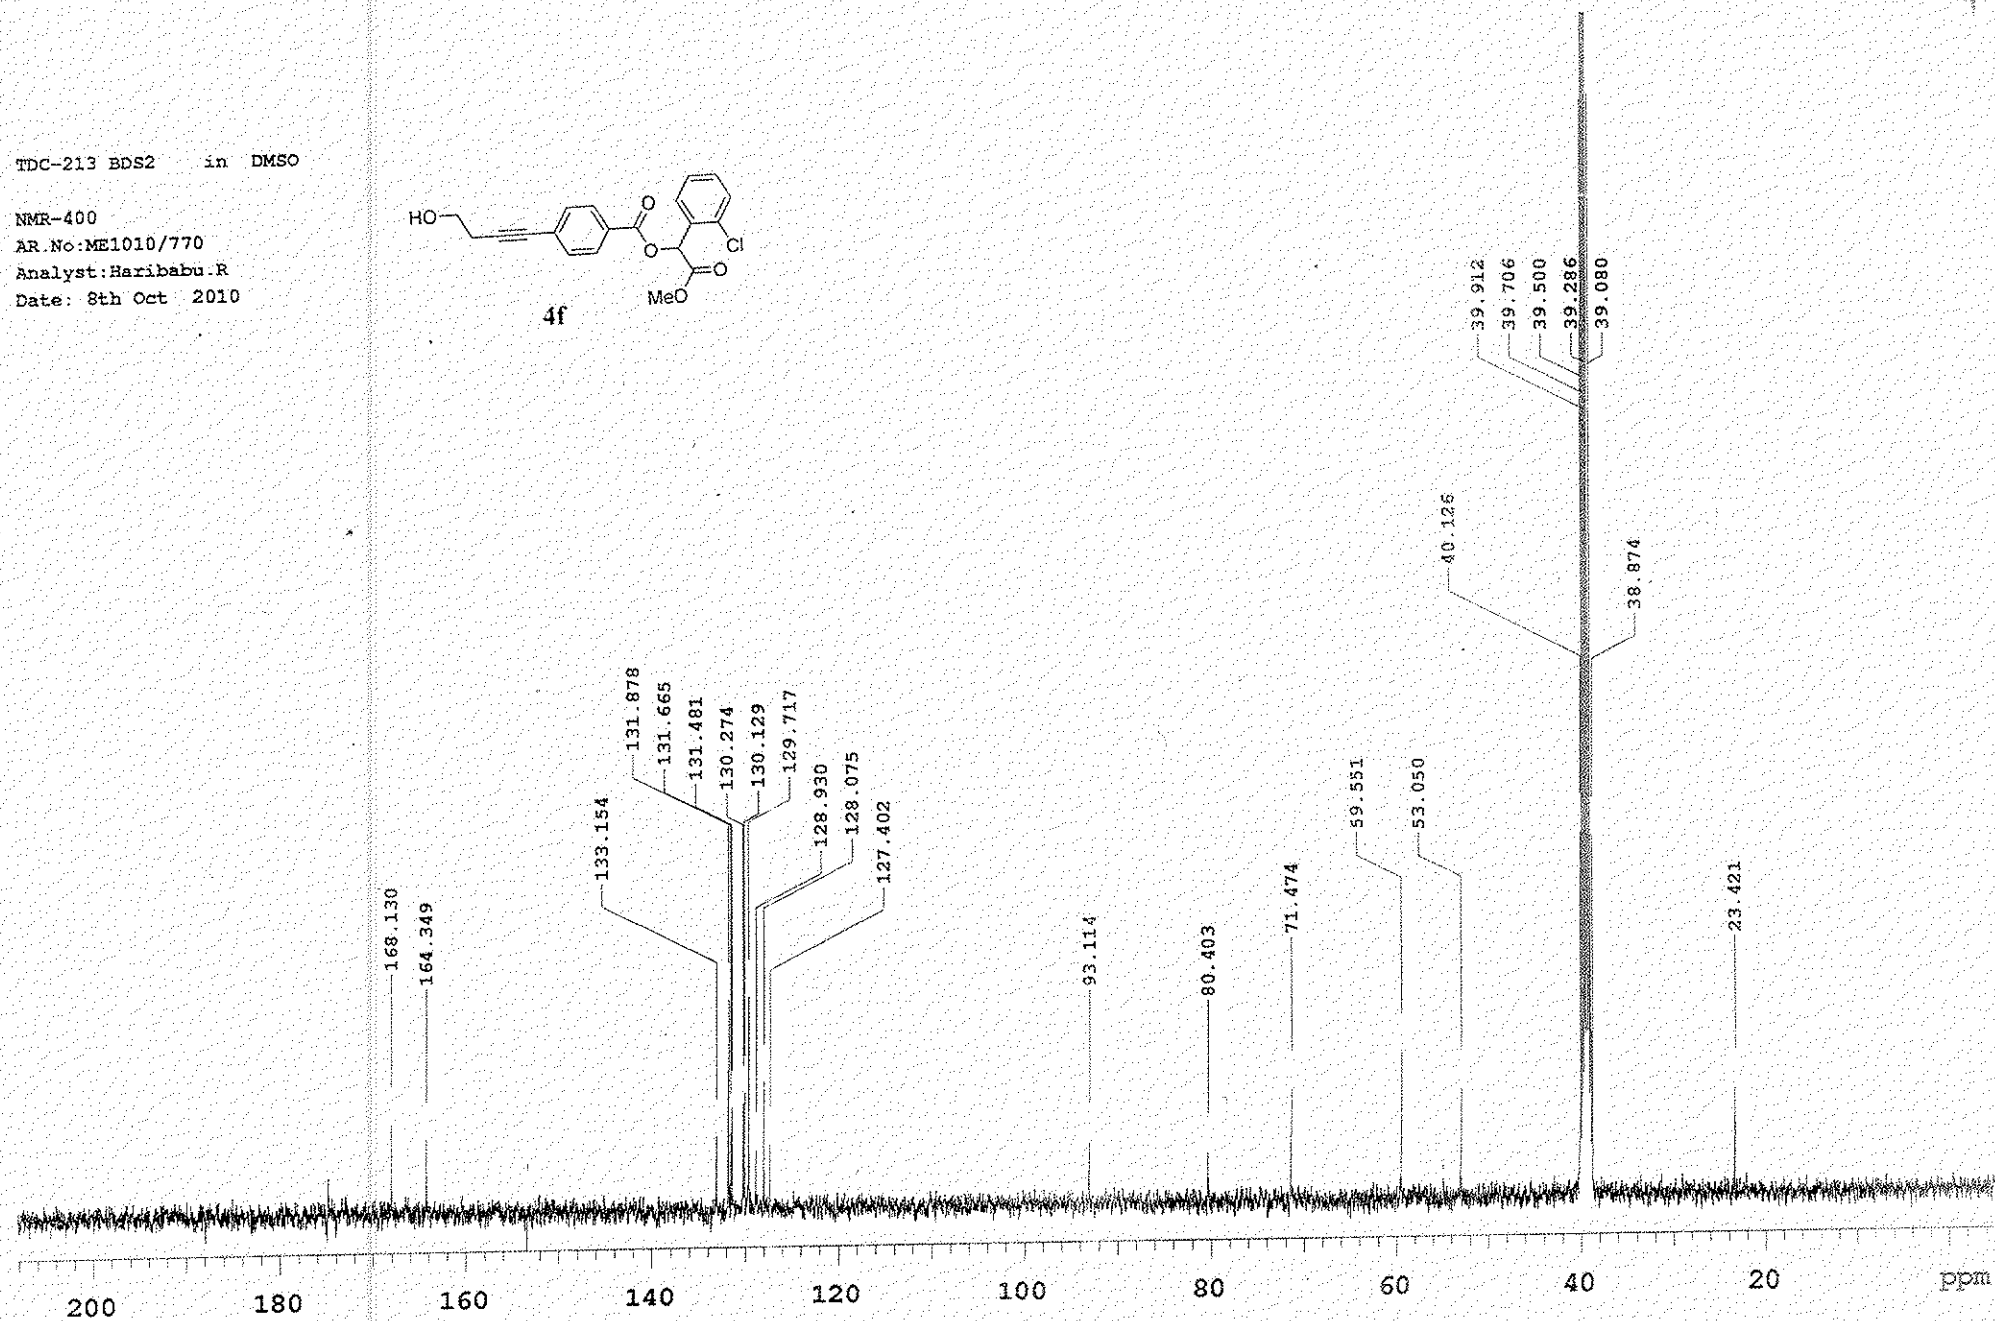



29/10/10

1: TOF MS ES+  
6.25e3

BAS2

UT1010\_199 8 (0.145) Cm (8:28-79:100)

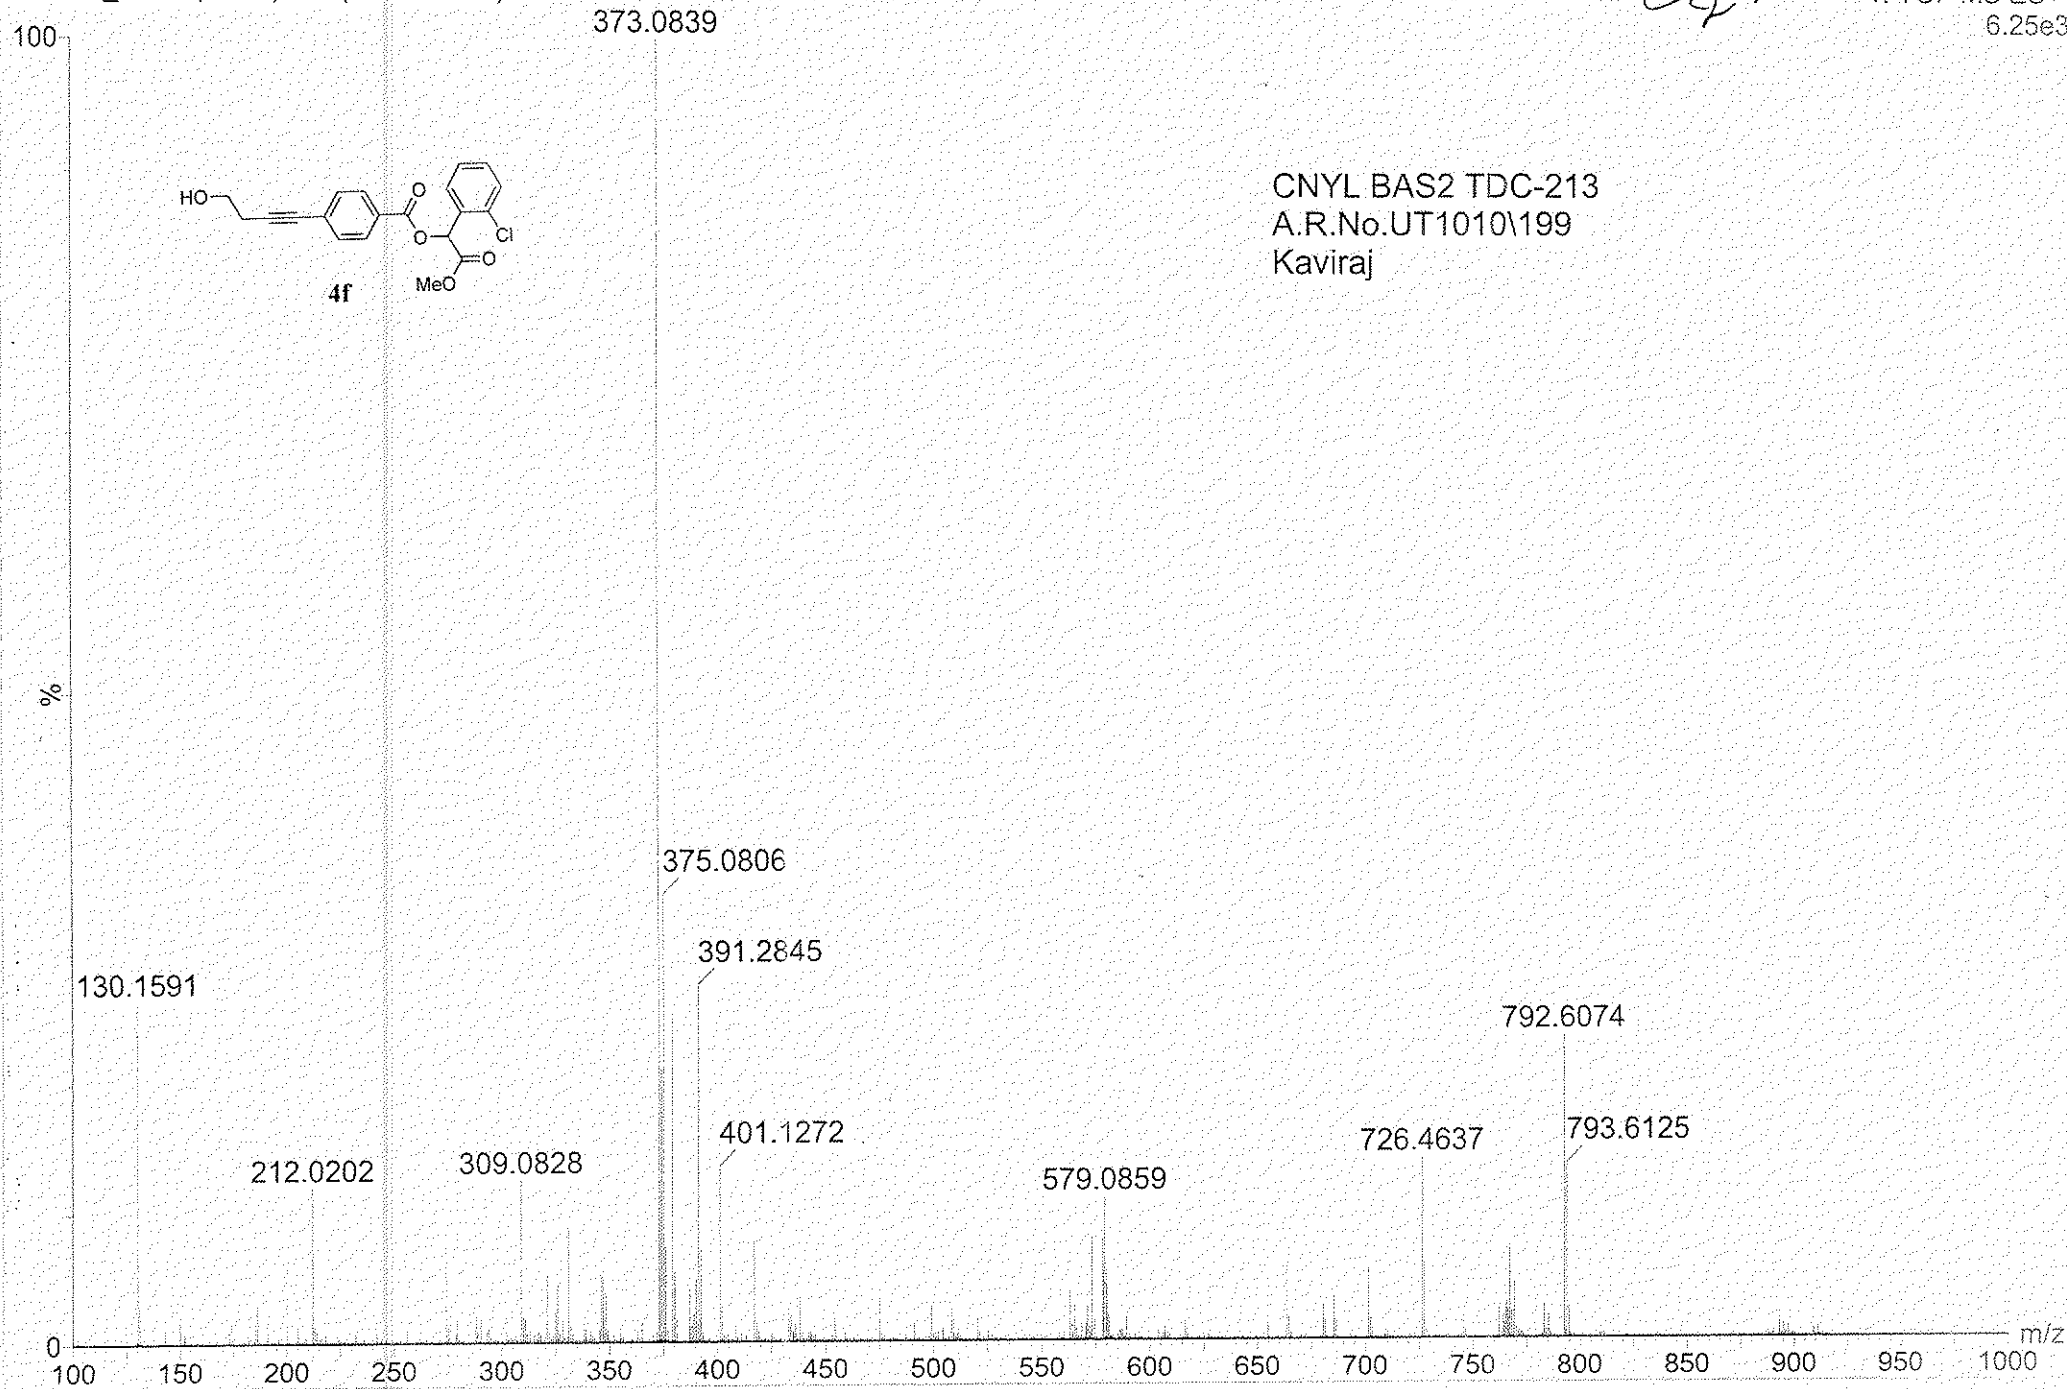



29/10/10

## Single Mass Analysis

Tolerance = 5.0 PPM / DBE: min = -1.0, max = 80.0

Element prediction: Off

Number of isotope peaks used for i-FIT = 3

Monoisotopic Mass, Even Electron Ions

80 formula(e) evaluated with 1 results within limits (up to 4 closest results for each mass)

Elements Used:

C: 0-45 H: 0-70 O: 0-5 Cl: 0-2

BA.S2

U71010\_199 8 (0.145) Cm (8:28-79:100)

1: TOF MS ES+  
6.25e+06

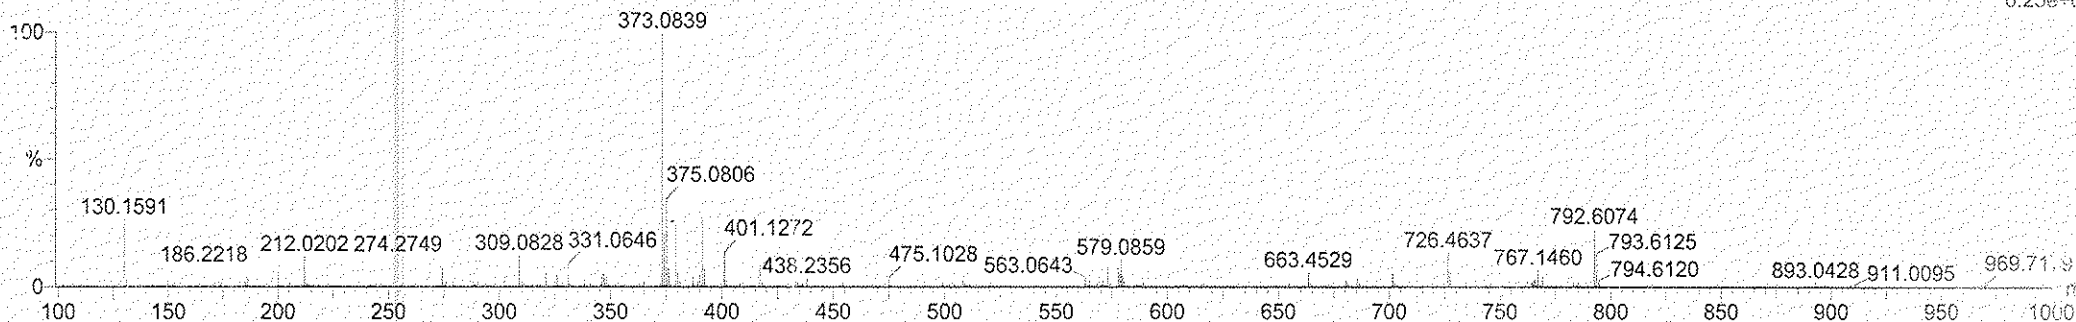

Minimum: -1.0  
Maximum: 5.0 5.0 80.0

| Mass     | Calc. Mass | mDa  | PPM  | DBE  | i-FIT | Formula       |
|----------|------------|------|------|------|-------|---------------|
| 373.0839 | 373.0843   | -0.4 | -1.1 | 11.5 | 3.6   | C20 H18 O5 Cl |

32CR-400  
AR. No: MS1010/722  
Analyst: Haribabu R  
Date: 8th Oct 2010

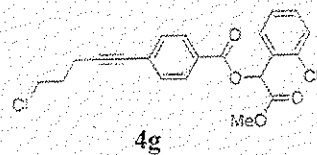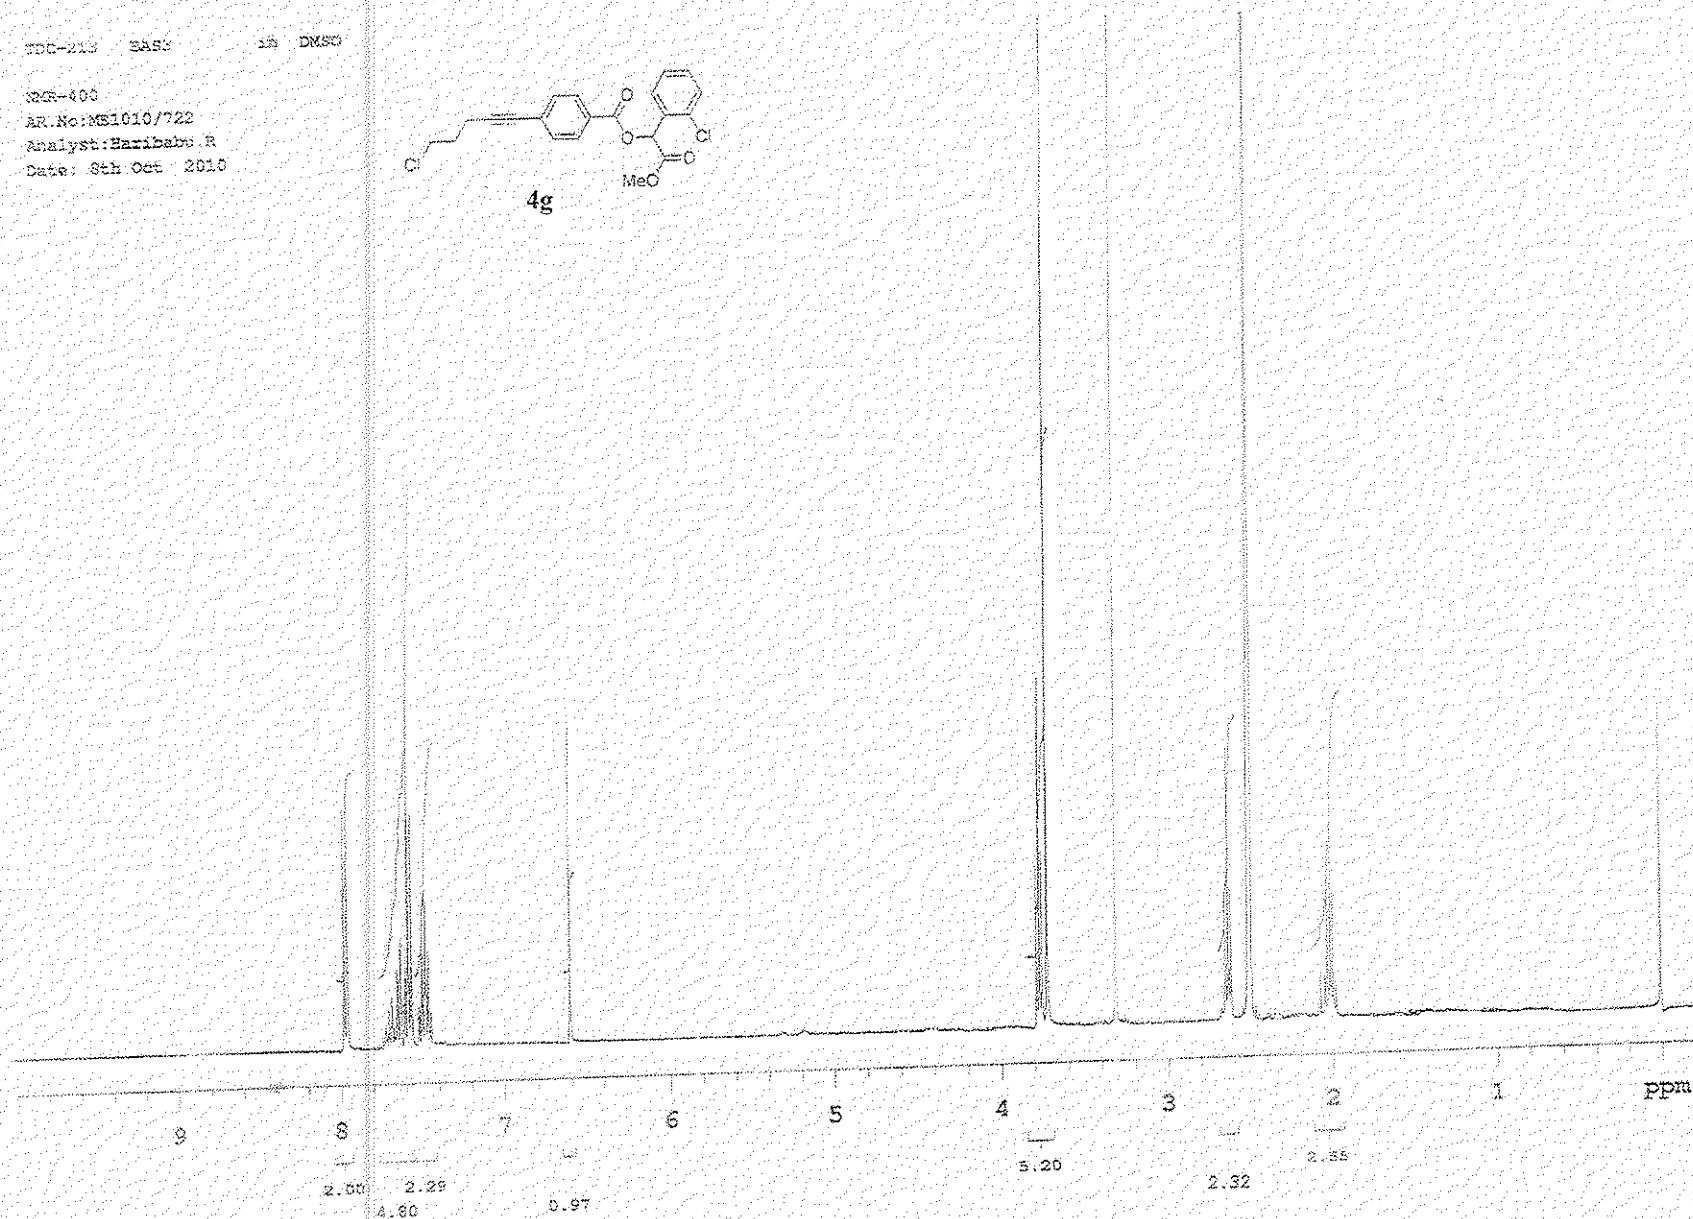

TDC-213 BAS3 in DMSO

NMR-400

AR.No:ME1010/1048

Analyst:Shruthi

Date:12th Oct 2010

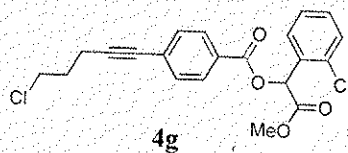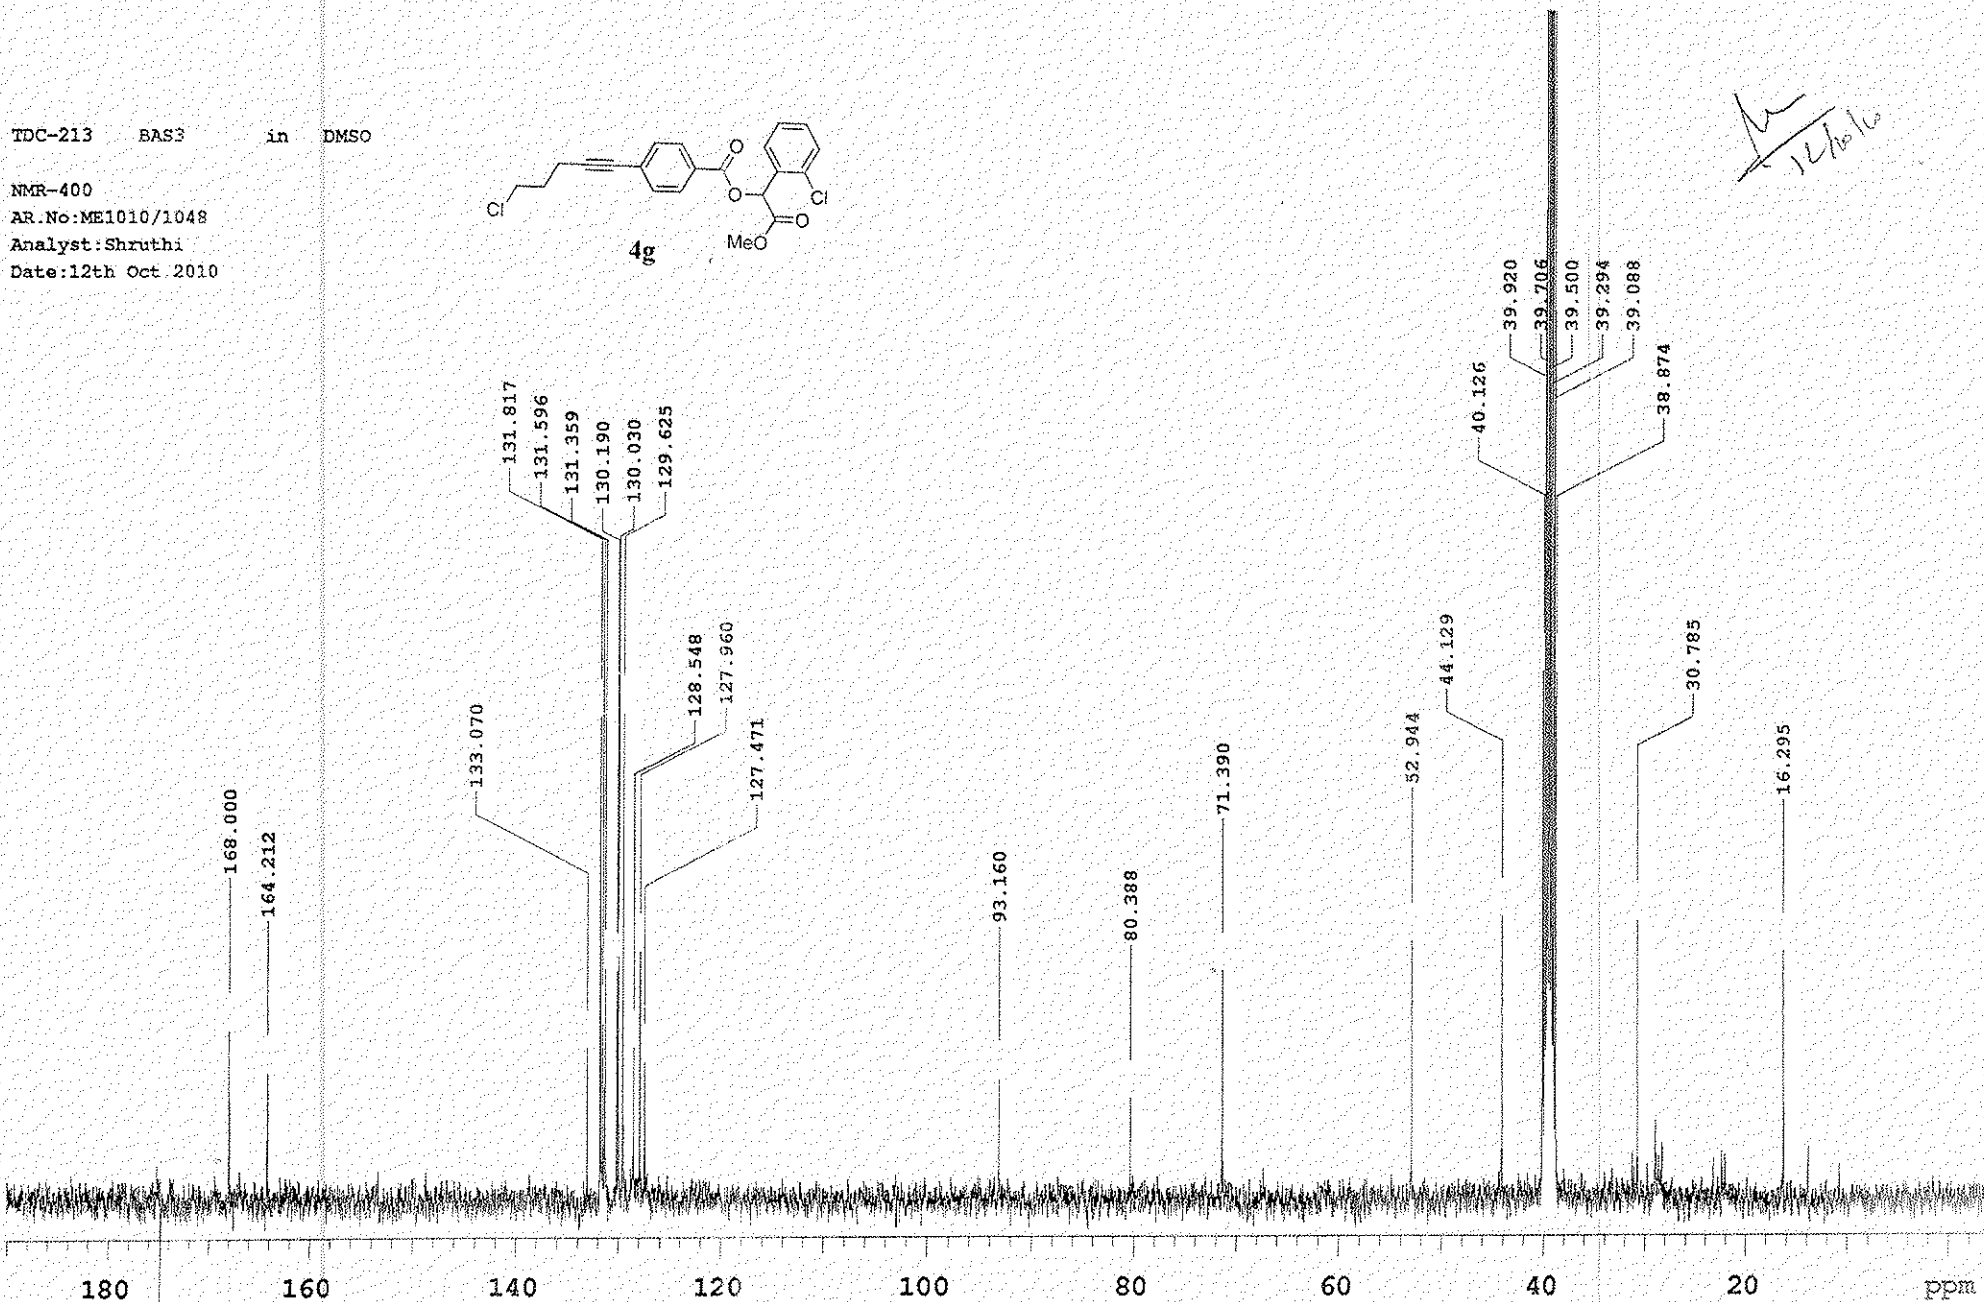

14/10/10

BAS3

UT1010\_260 5 (0.127) Cm (5:7-61:79)

212.0207

1: TOF MS E3+

487

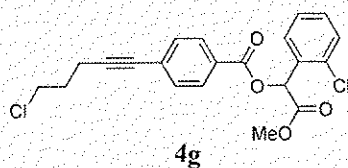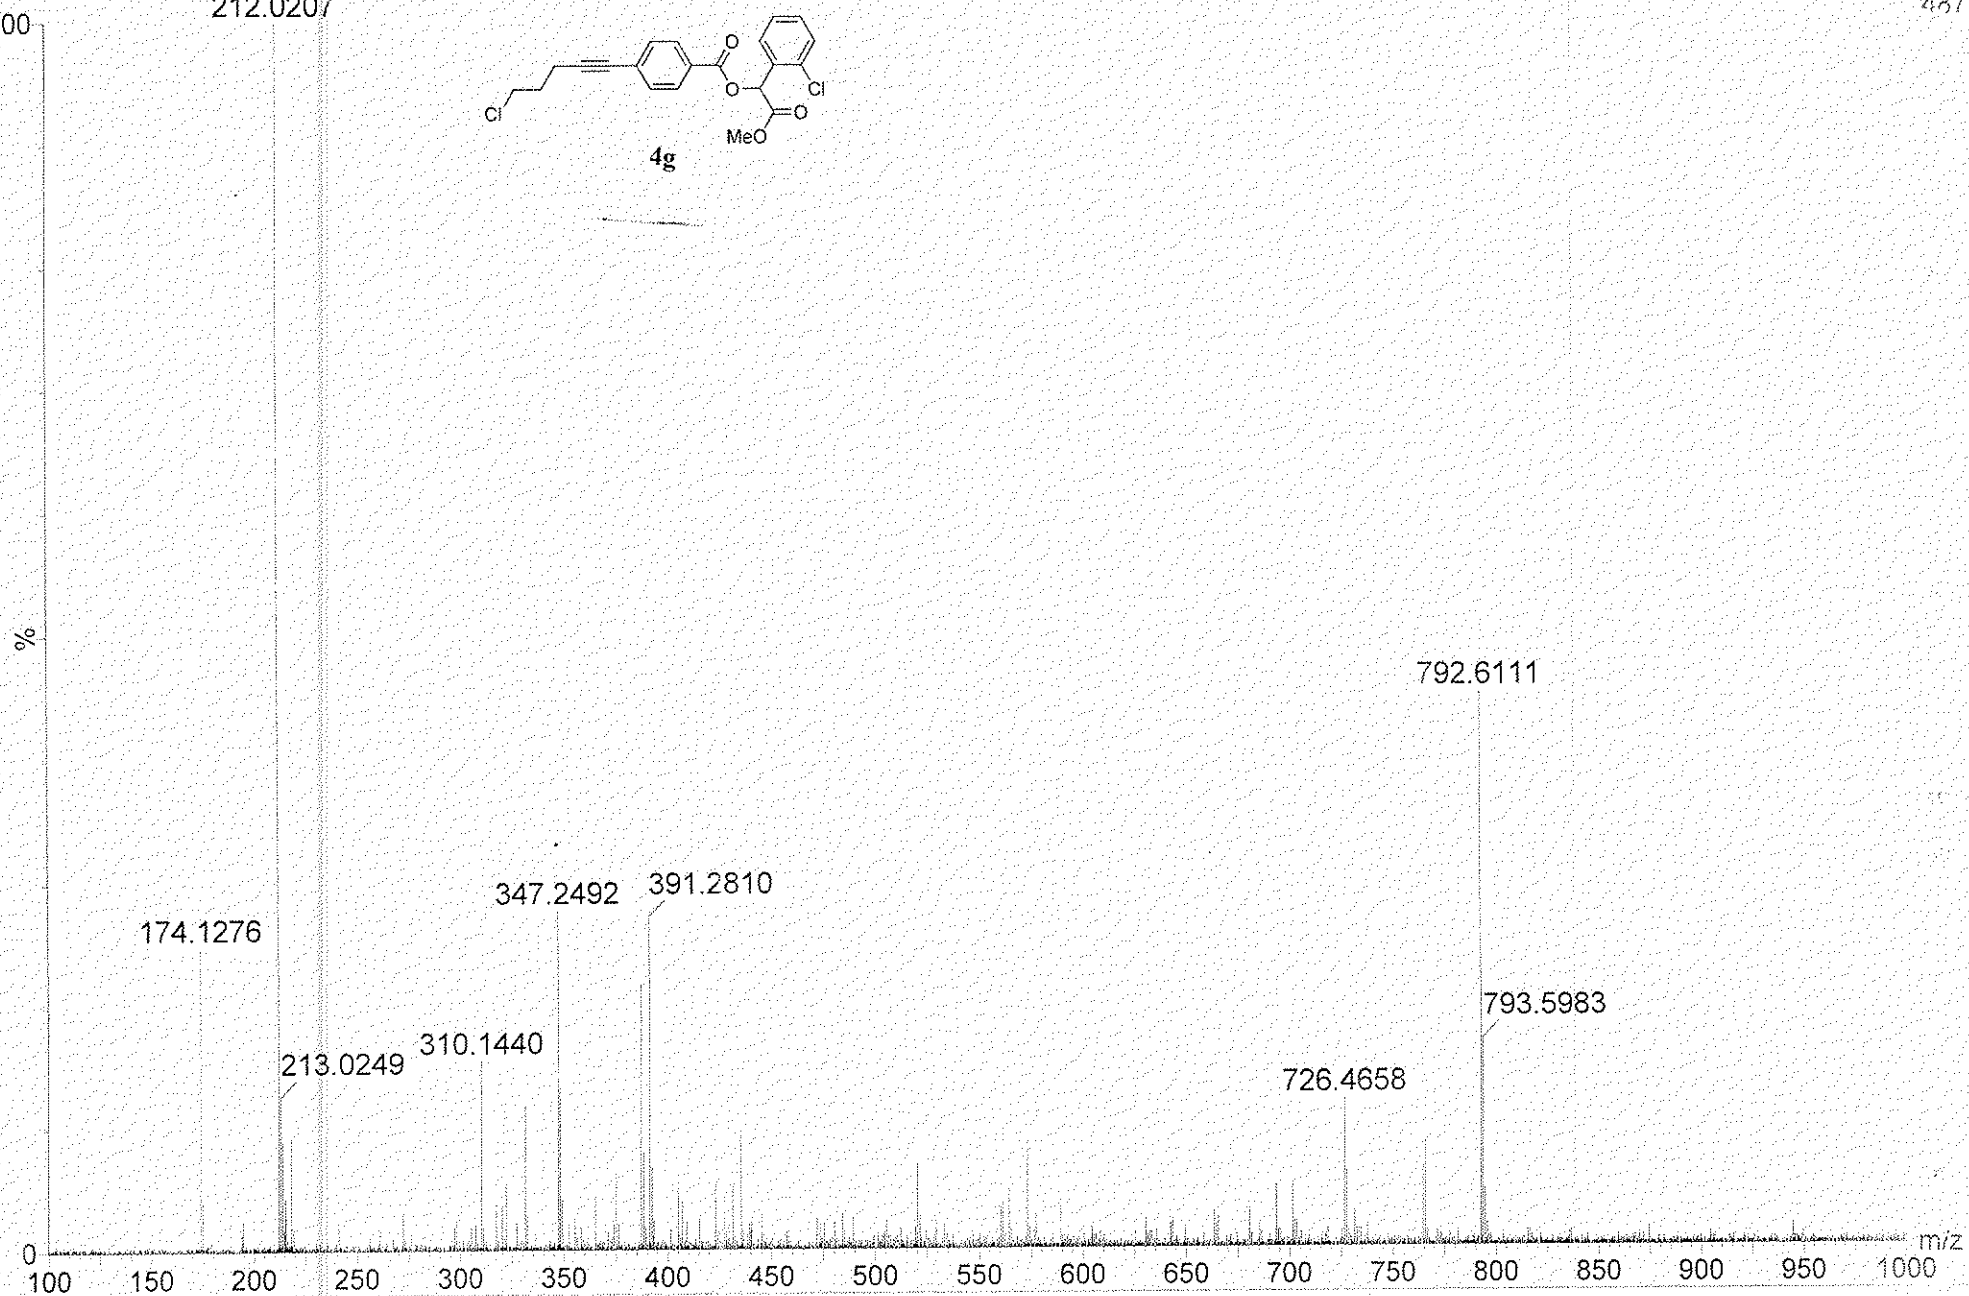



## Elemental Composition Report

Page 1

### Single Mass Analysis

Tolerance = 20.0 PPM / DBE: min = -1.0, max = 80.0

Element prediction: Off

Number of isotope peaks used for i-FIT = 3

Monoisotopic Mass, Even Electron Ions

78 formula(e) evaluated with 4 results within limits (up to 4 best isotopic matches for each mass)

Elements Used:

C: 0-30 H: 0-35 O: 0-8 Cl: 0-2

BAS3

UT1010\_260 5 (0.127) Cm (5.7-61.79)

1: TOF MS ES+  
1.32e+02

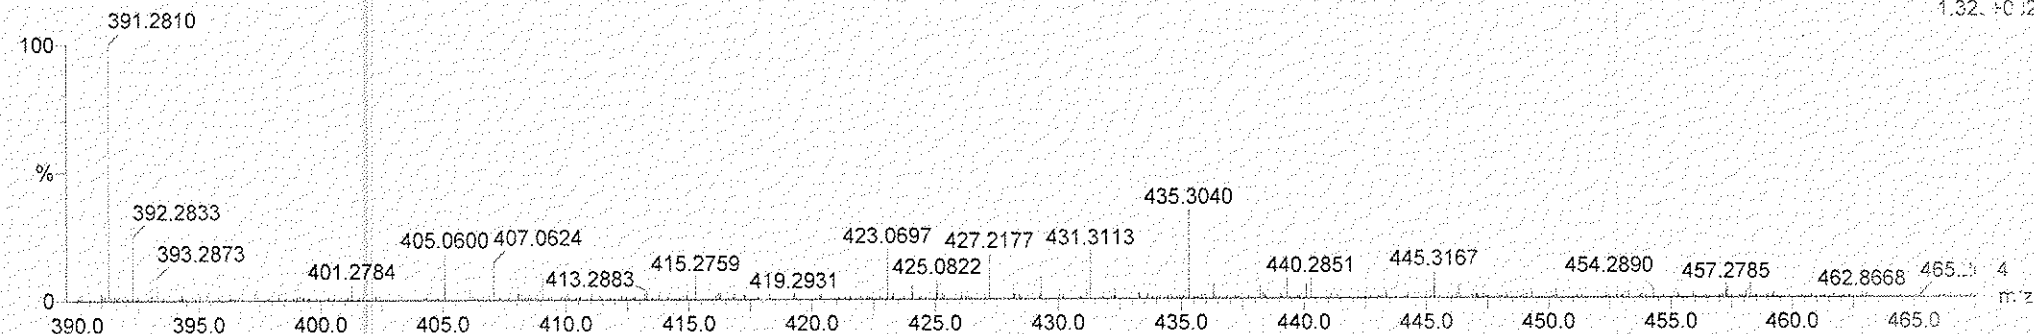

Minimum: -1.0  
Maximum: 5.0 20.0 80.0

| Mass     | Calc. Mass | mDa  | PPM   | DBE  | i-FIT | Formula        |
|----------|------------|------|-------|------|-------|----------------|
| 405.0600 | 405.0660   | -6.0 | -14.8 | 11.5 | 0.3   | C21 H19 O4 Cl2 |
|          | 405.0530   | 7.0  | 17.3  | 16.5 | 21.3  | C23 H14 O5 Cl  |
|          | 405.0610   | -1.0 | -2.5  | 16.5 | 21.4  | C22 H13 O8     |
|          | 405.0552   | 4.8  | 11.9  | 25.5 | 21.5  | C29 H9 O3      |



TDC-213 BAS4 in DMSO

NMR-400

AR.No:ME1010/2365

Analyst:Shruthi

Date: 28 th Oct 2010

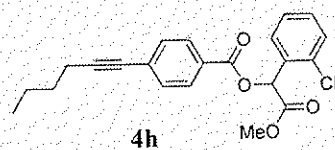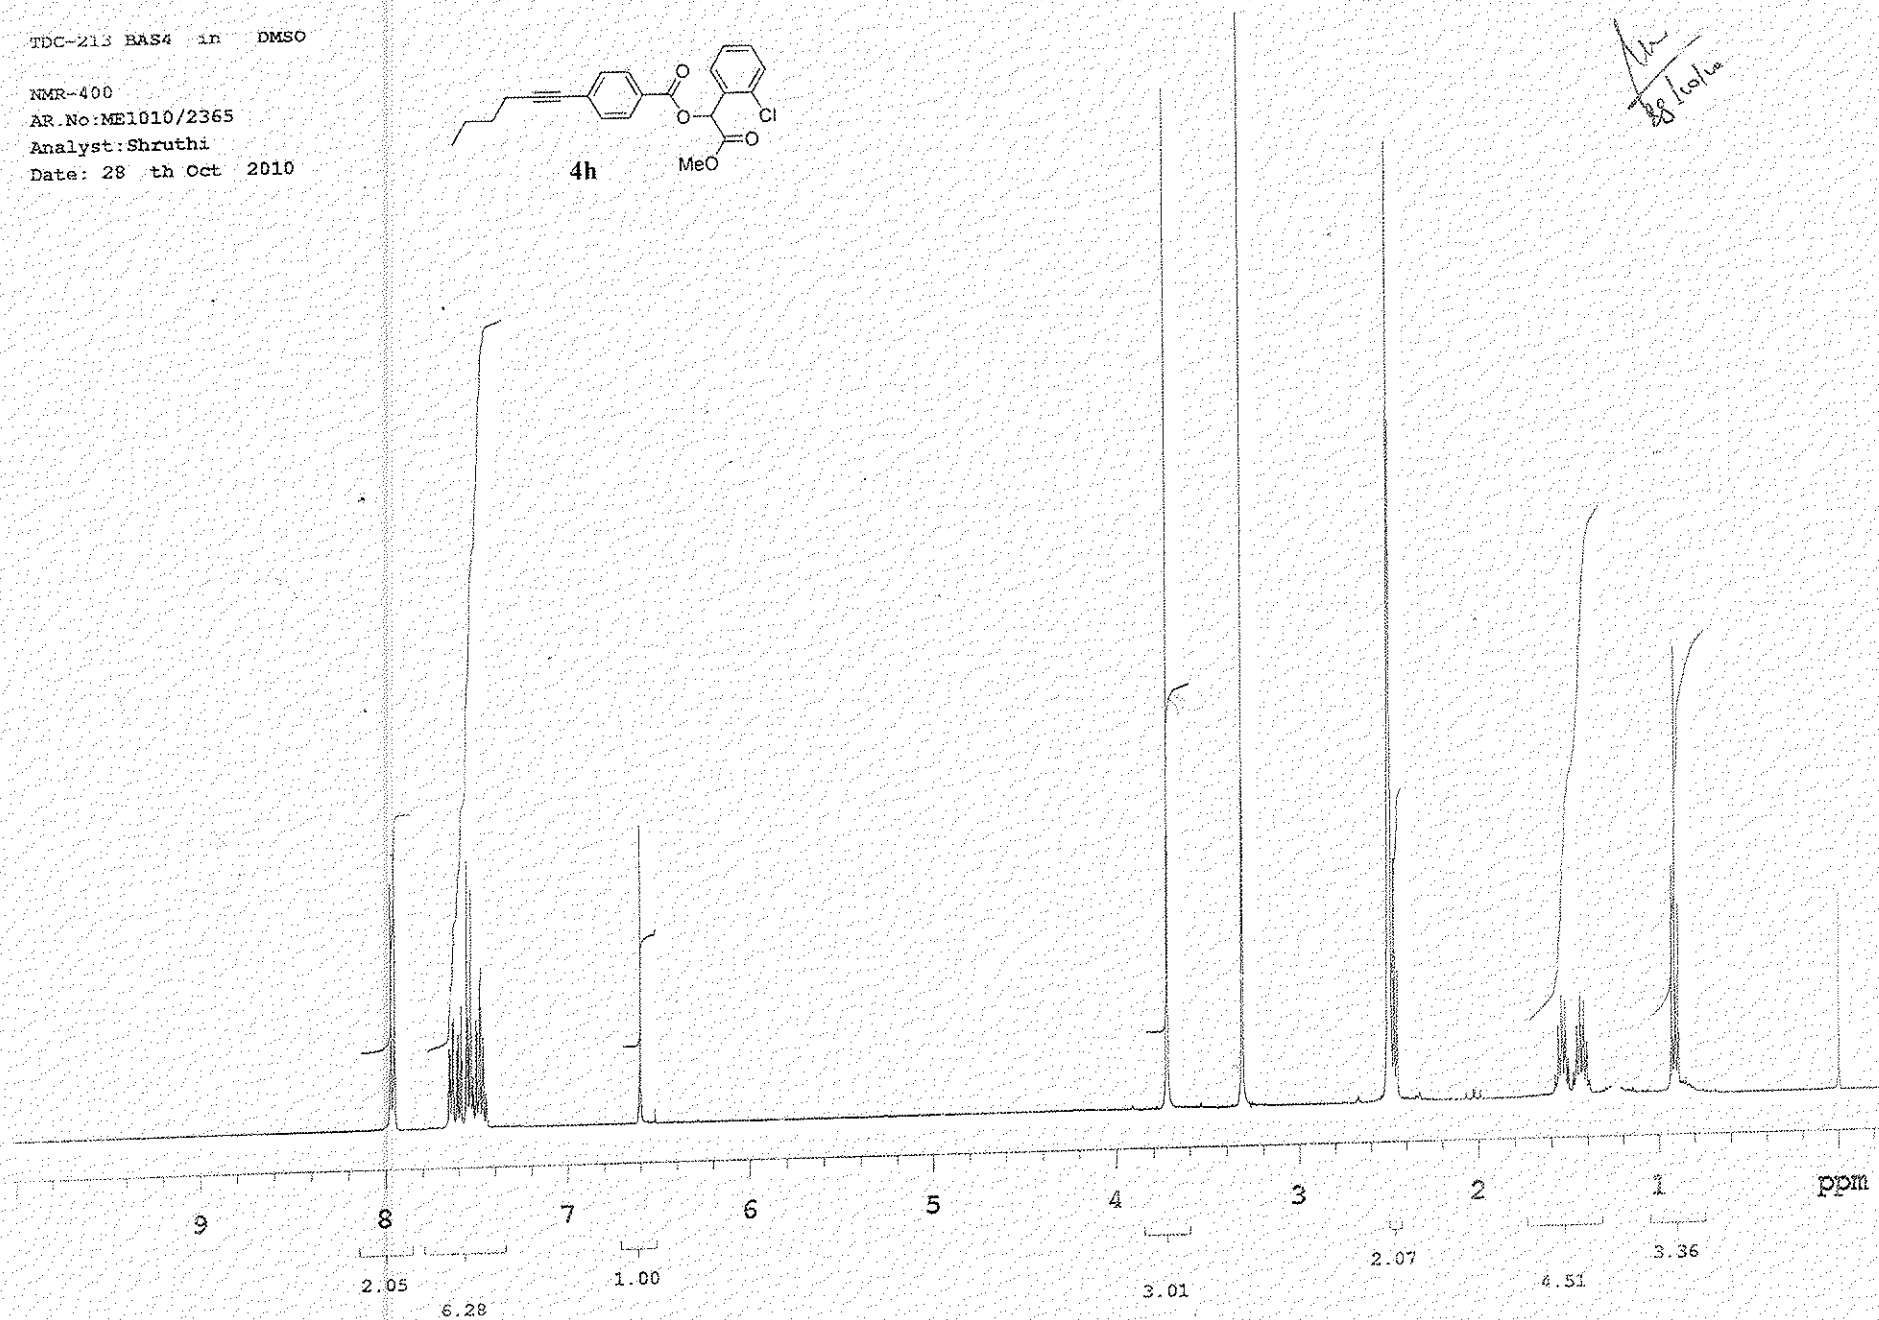

TDC-213 BAS4 in DMSO

NMR-400

AR.No:ME1110/772

Analyst:Haribabu.R

Date: 12 th Nov 2010

Sample Name:

772-TDC-213\_BAS4

Data Collected on:

mercuryj-mercury400

Archive directory:

/home/sms50/routine/Nov2010/d\_12

Sample directory:

772-TDC-213\_BAS4\_20101113\_01

FidFile: 772-TDC-213\_BAS4\_20101113\_01

Pulse Sequence: CARBON (s2pul)

Solvent: dmsO

Data collected on: Nov 13 2010

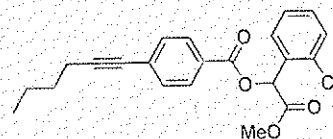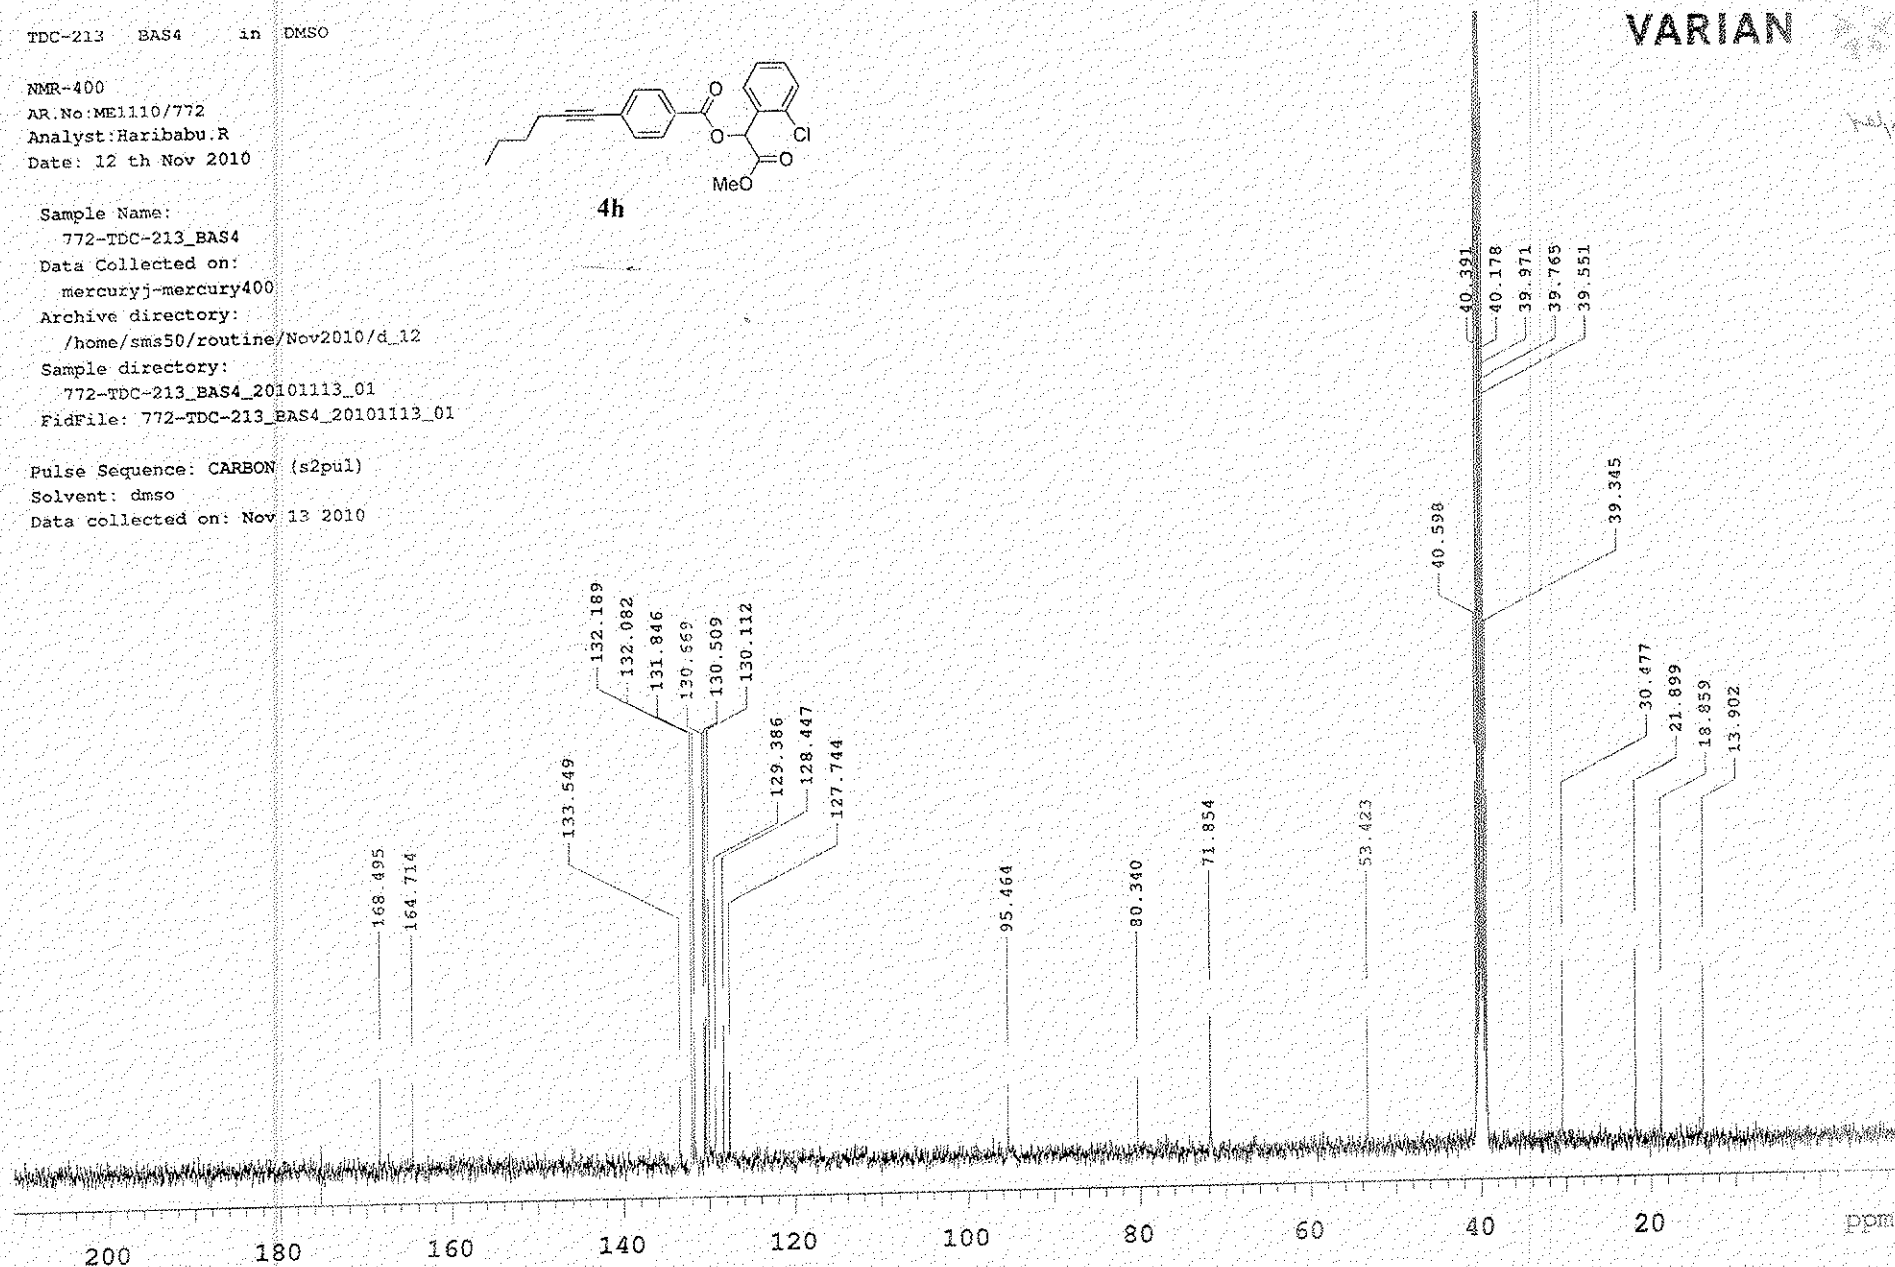

Plotname: 772-TDC-213\_BAS4\_20101113\_01\_plot01

VARIAN

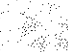

77211

BAS4

UT1010\_200 7 (0.131) Cm (6:20-81:90)

29/10/10

1: TOF MS ES+  
4.65-4

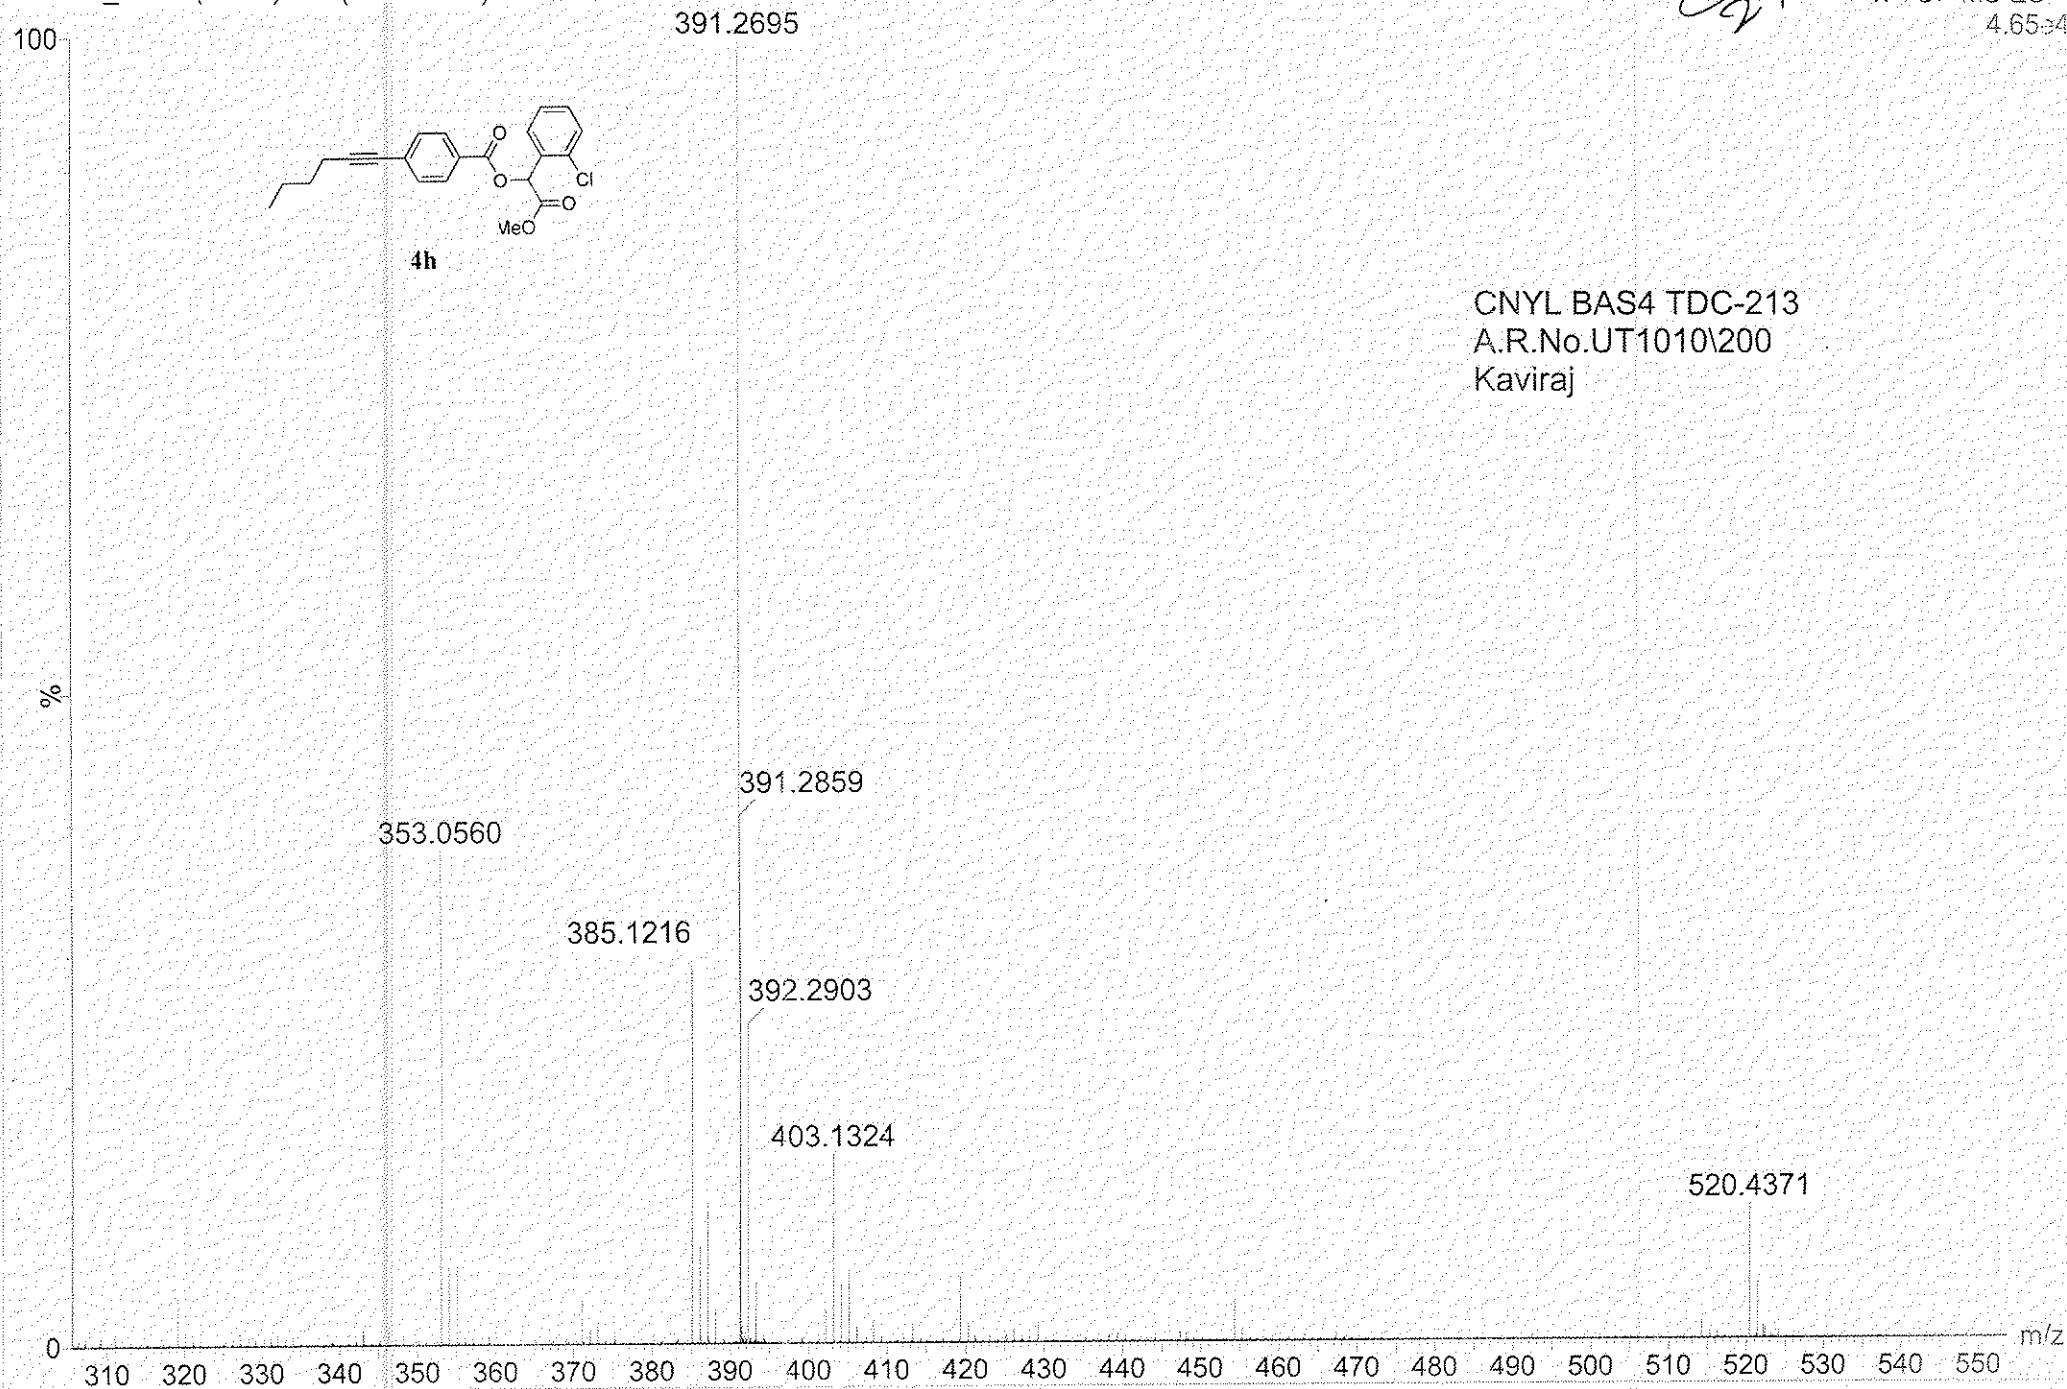

CNYL BAS4 TDC-213  
A.R.No.UT1010\200  
Kaviraj

29/10/10

## Single Mass Analysis

Tolerance = 5.0 PPM / DBE: min = -1.0, max = 80.0

Element prediction: Off

Number of isotope peaks used for i-FIT = 3

Monoisotopic Mass, Even Electron Ions

82 formula(e) evaluated with 2 results within limits (up to 4 closest results for each mass)

Elements Used:

C: 0-45 H: 0-70 O: 0-5 Cl: 0-2

BA.S4

U11010\_200 7 (0.131) Cm (6:20-81:90)

1: TOF MS ES  
4.65e+0

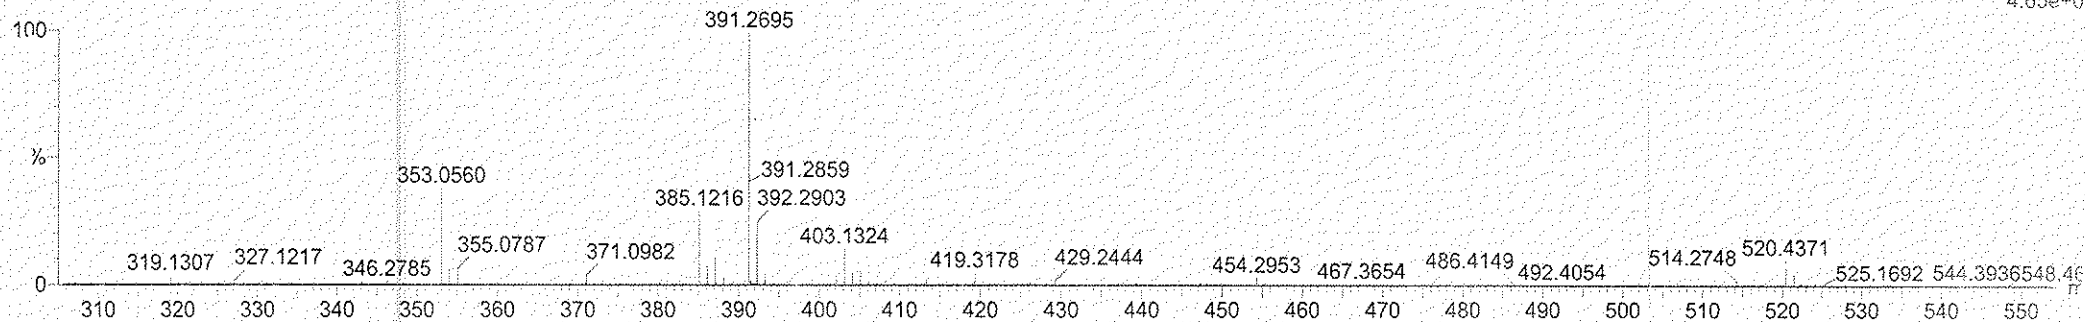

Minimum: -1.0  
Maximum: 5.0 5.0 80.0

| Mass     | Calc. Mass | mDa  | PPM  | DBE  | i-FIT  | Formula       |
|----------|------------|------|------|------|--------|---------------|
| 385.1216 | 385.1207   | 0.9  | 2.3  | 11.5 | 2.8    | C22 H22 O4 Cl |
|          | 385.1229   | -1.3 | -3.4 | 20.5 | 1946.4 | C28 H17 O2    |



TDC-213-A586-BAS-005 in DMSO

NMR-400

AR.No:ME1010/530

Analyst:Shruthi

Date: 7th Oct 2010

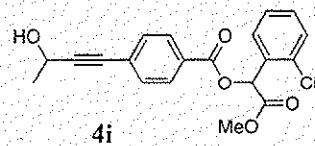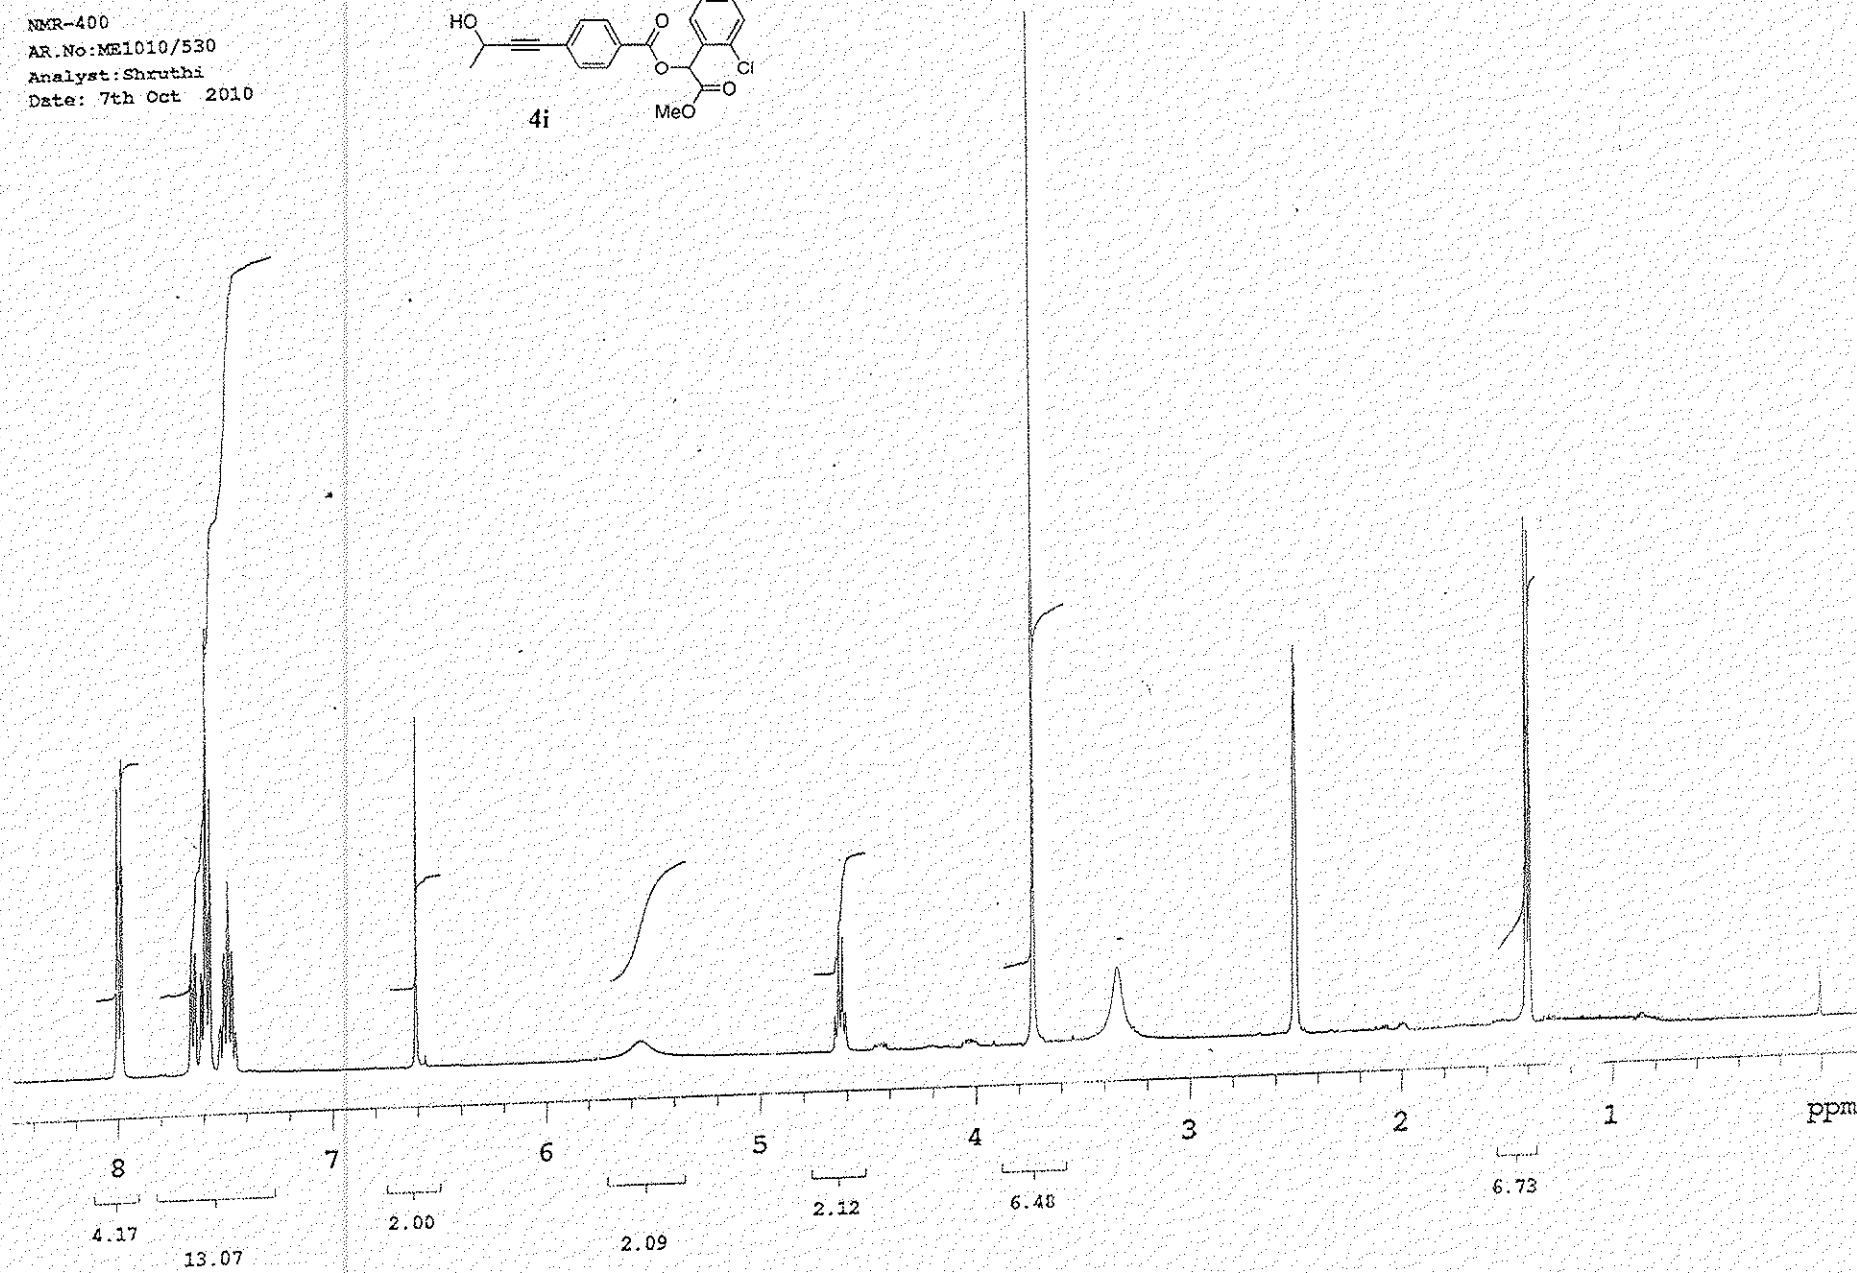



BASS 1h CD300  
TDC-213  
AR NO:GE1010/64  
Analyst:Haribabu.R  
Date: 25 th Oct 2010

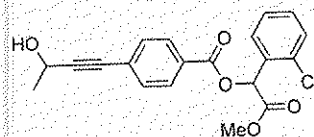

4i

AR&D, Aurigene Discovery Technologies Ltd, Hyderabad  
Instrument : Gemini 2000 (Varian 200MHz)  
Date & Time : Wed Oct 27 18:04:05 GMT 2010  
Recorded By : Haribabu.R

25.036

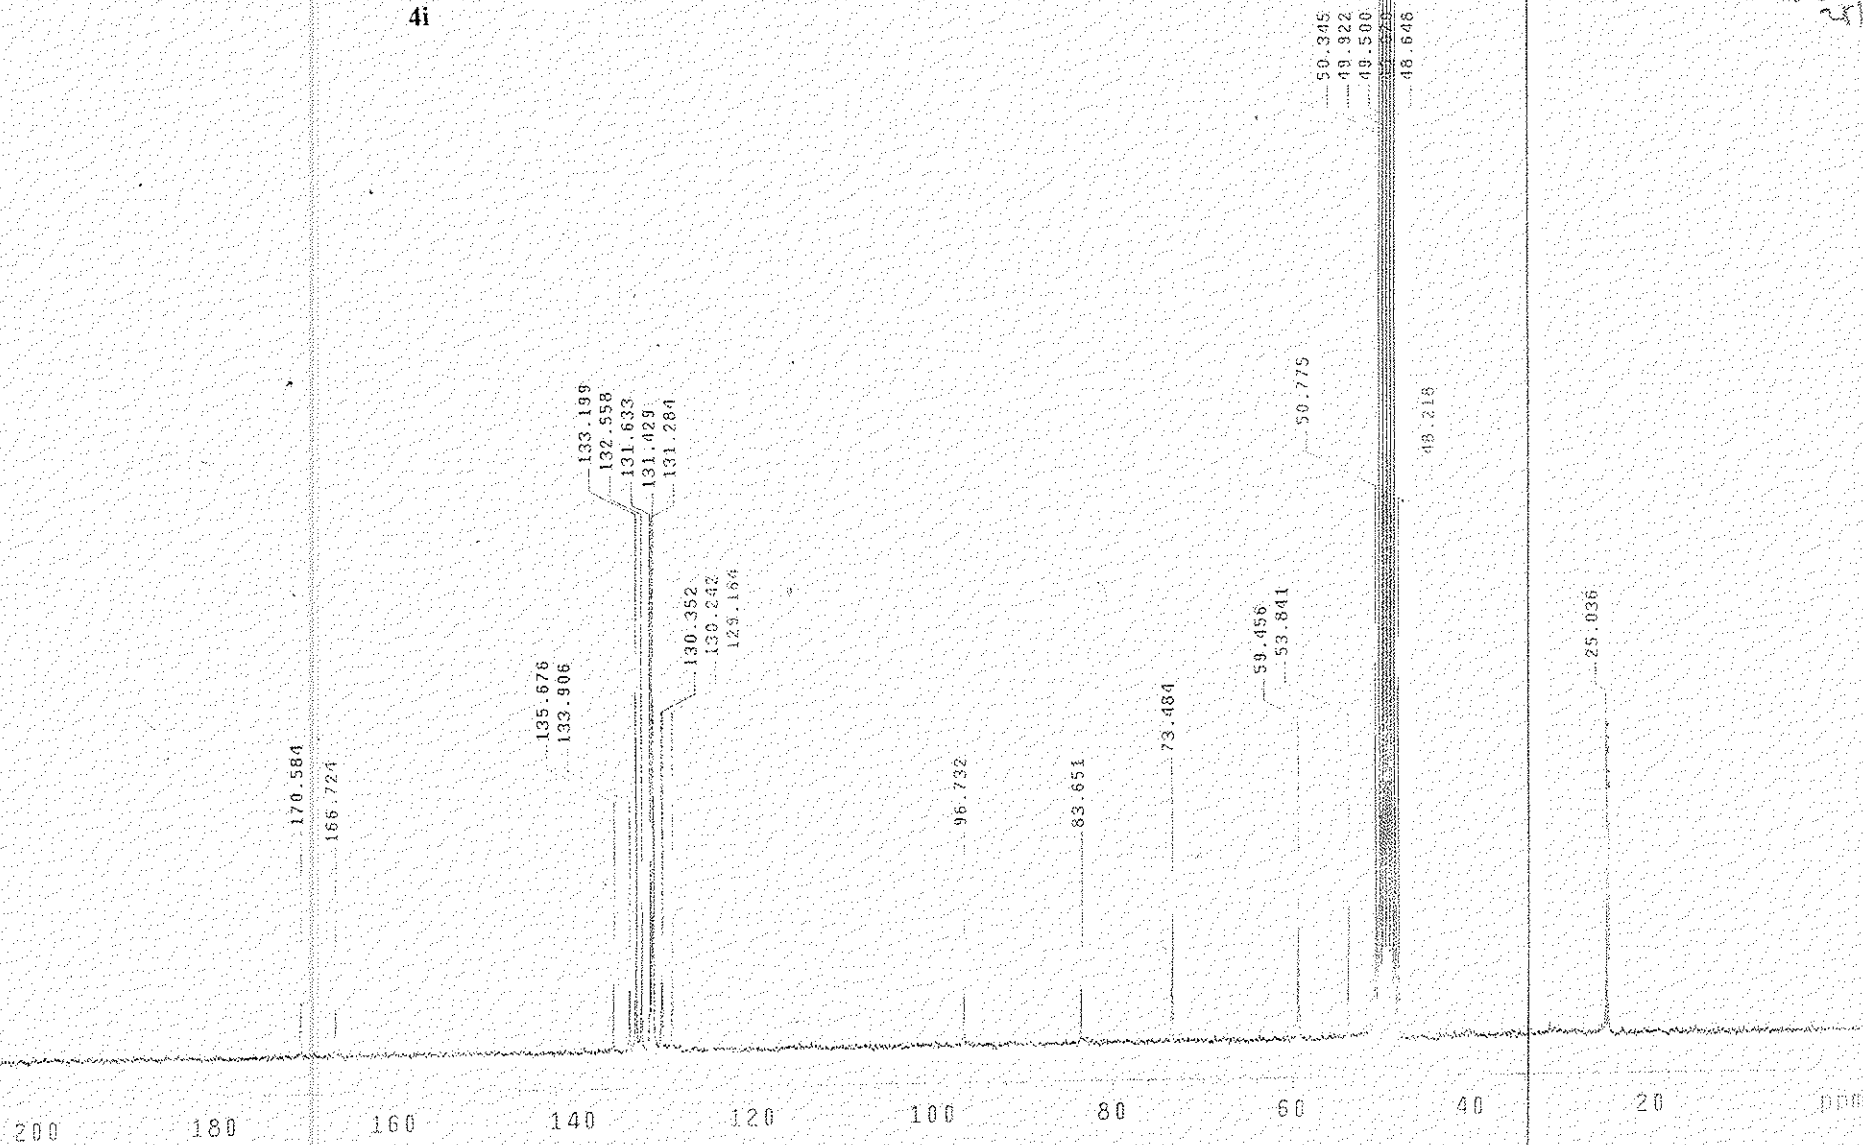

BAS5

UT1010\_201 7 (0.131) Cm (7:10-73:84)

29/10/10

1: TOF MS ES+  
2.9733

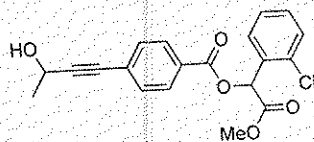

4i

CNYL BAS5 TDC-213  
A.R.No.UT1010\201  
Kaviraj

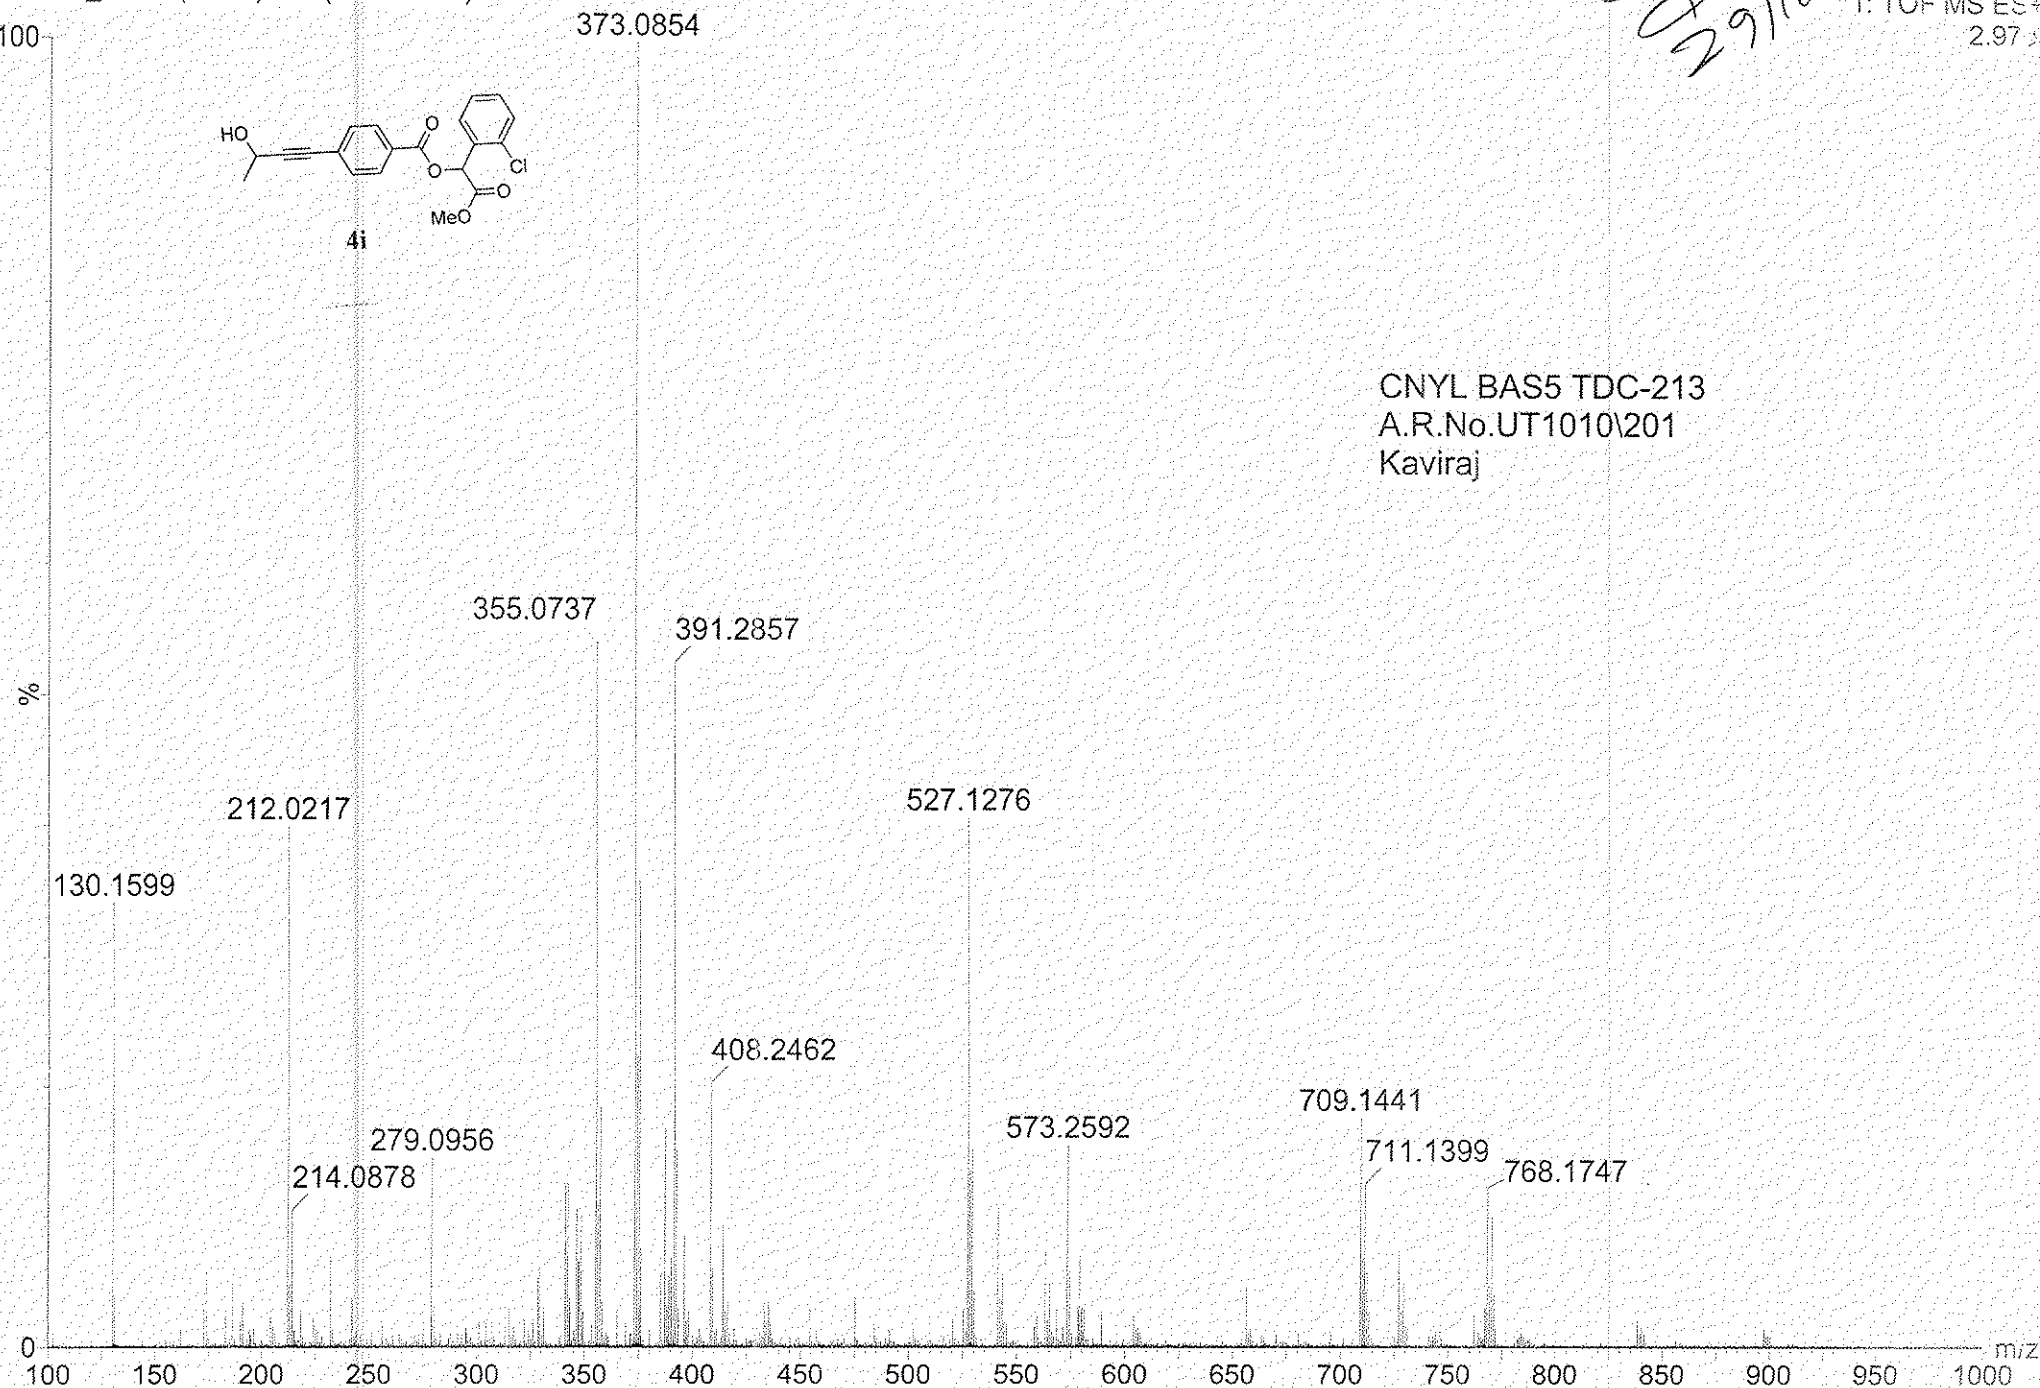

## Single Mass Analysis

Tolerance = 10.0 PPM / DBE: min = -1.0, max = 80.0

Element prediction: Off

Number of isotope peaks used for i-FIT = 3

Monoisotopic Mass, Even Electron Ions

92 formula(e) evaluated with 2 results within limits (up to 4 closest results for each mass)

Elements Used:

C: 0-45 H: 0-70 O: 0-6 Cl: 0-2

Base

UT1010\_201 7 (0.131) Cm (7:10-73:84)

1: TOF MS ES  
2.97e+0

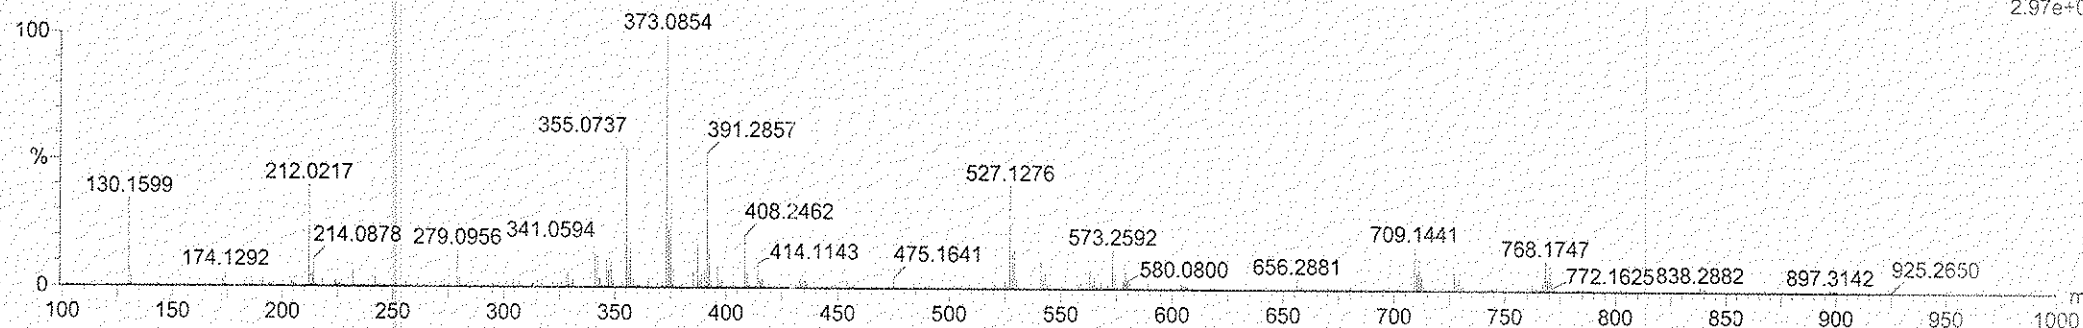

Minimum: -1.0  
Maximum: 5.0 10.0 80.0

| Mass     | Calc. Mass | mDa  | PPM  | DBE  | i-FIT | Formula       |
|----------|------------|------|------|------|-------|---------------|
| 373.0854 | 373.0843   | 1.1  | 2.9  | 11.5 | 0.1   | C20 H18 O5 Cl |
|          | 373.0865   | -1.1 | -2.9 | 20.5 | 430.3 | C26 H13 O3    |

700 MHz, CDCl<sub>3</sub> 411 00000

NAME: 4j  
ANALYST: H. H. H. H.  
DATE: 10/10/2010

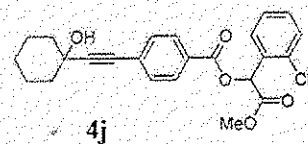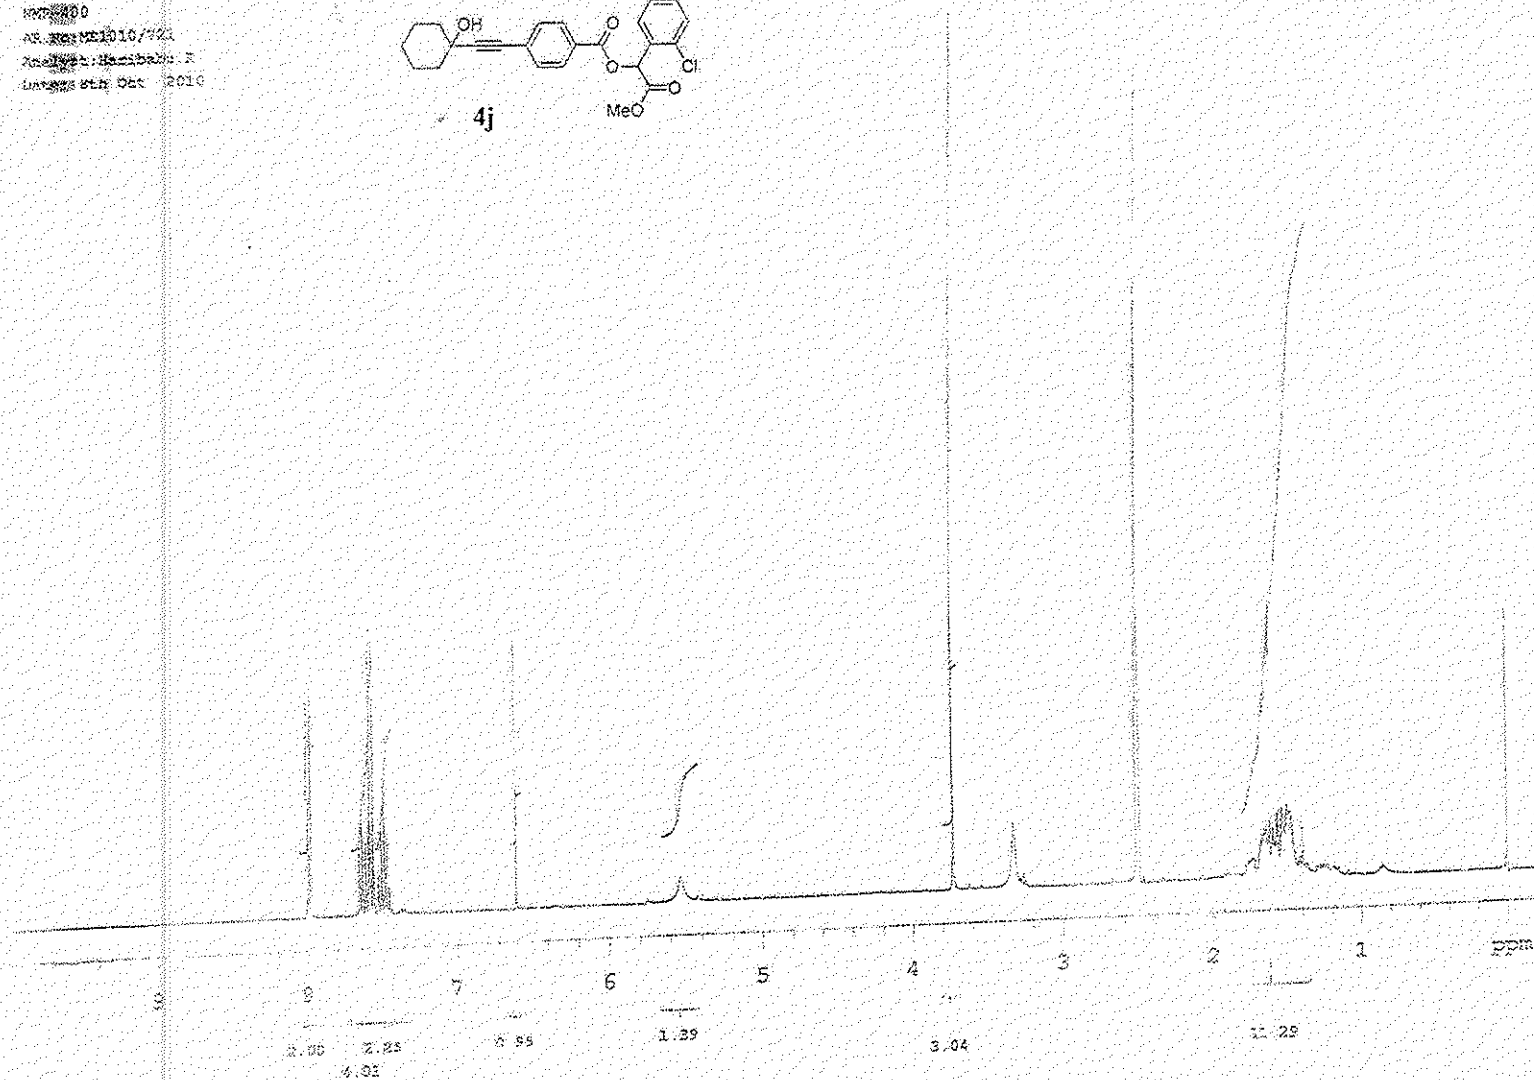



TDC-213 BAS6 in DMSO

NMR-400

AR.No:ME1010/2353

Analyst:Shruthi

Date: 27 th Oct 2010

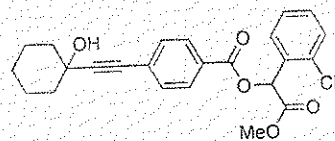

4j

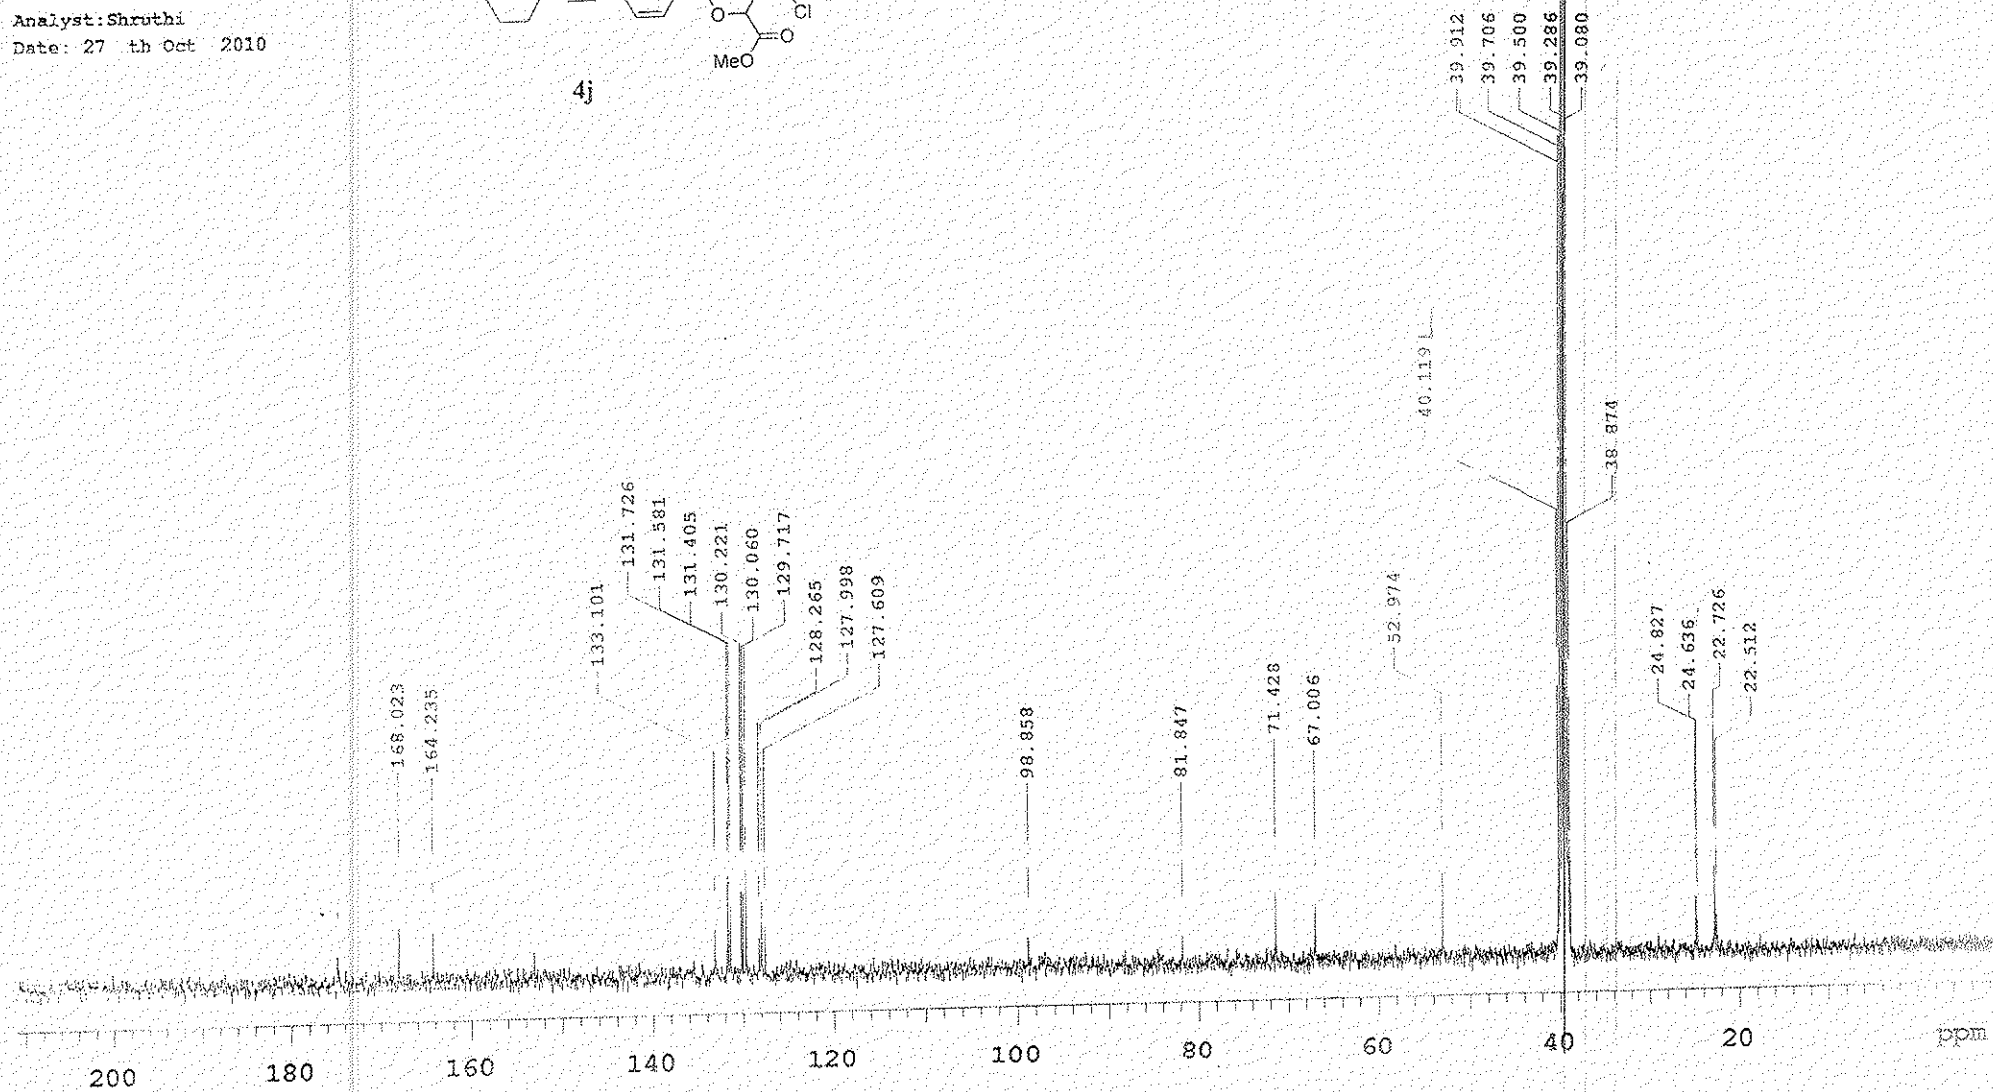

Page 2/11

BAS6

UT1010\_202 22 (0.413) Cm (22:27-84:92)

29/10/10

1: TOF MS ES+  
352

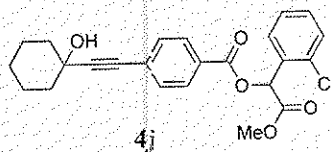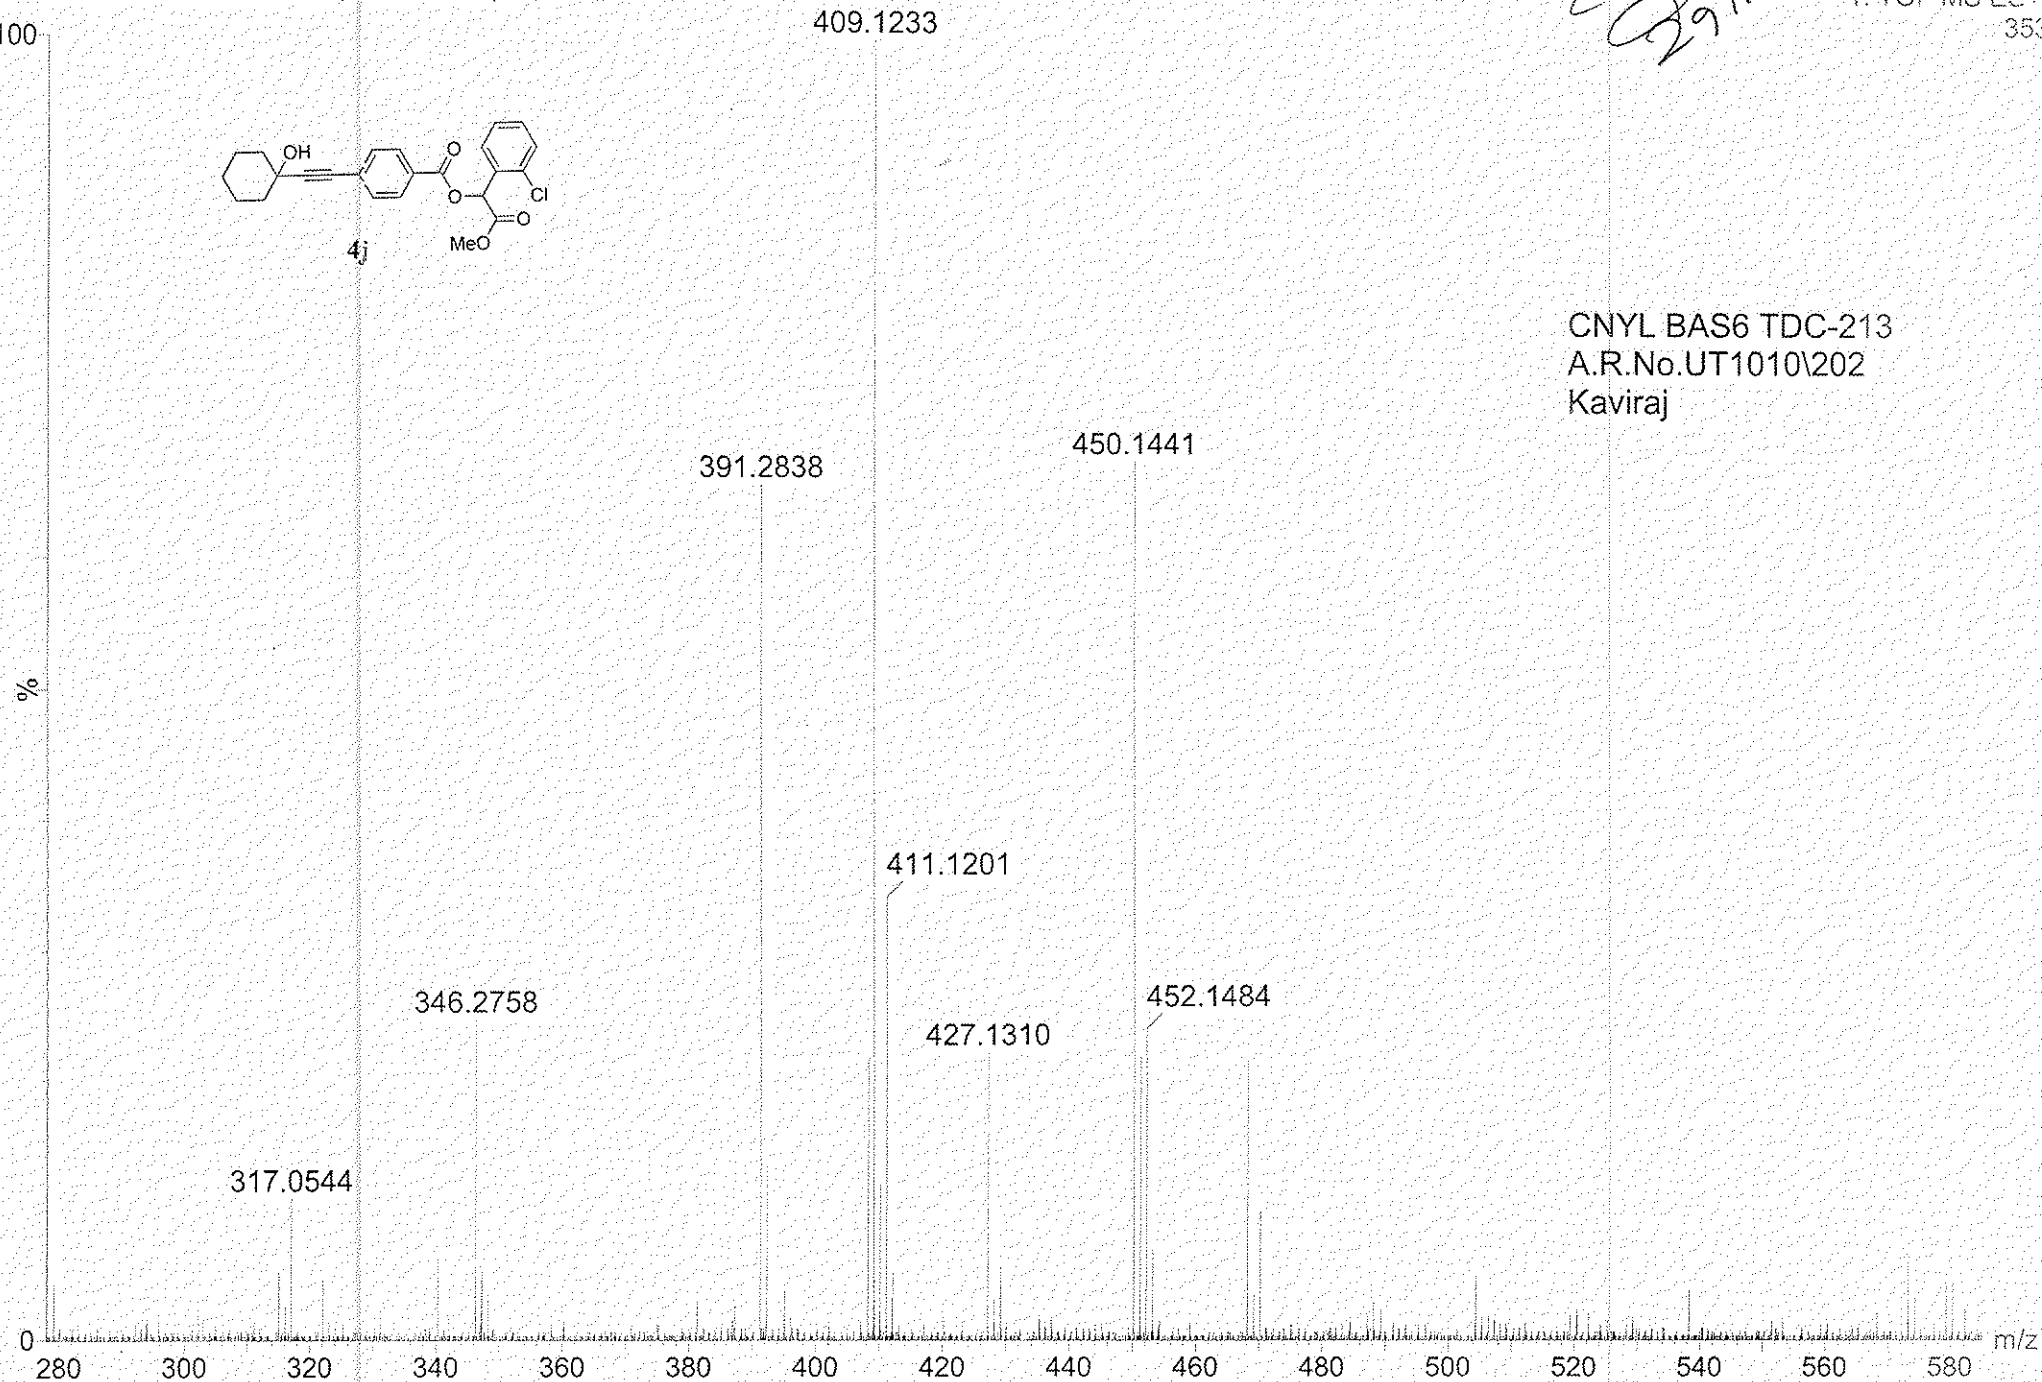

CNYL BAS6 TDC-213  
A.R.No.UT1010\202  
Kaviraj

## Elemental Composition Report

### Single Mass Analysis

Tolerance = 10.0 PPM / DBE: min = -1.0, max = 80.0

Element prediction: Off

Number of isotope peaks used for i-FIT = 3

Monoisotopic Mass, Even Electron Ions

105 formula(e) evaluated with 2 results within limits (up to 4 closest results for each mass)

Elements Used:

C: 0-45 H: 0-70 O: 0-6 Cl: 0-2

BAS6

UT1010\_202 22 (0.413) Cm (22:27-84:92)

1: TOF MS ES  
3.53e+0

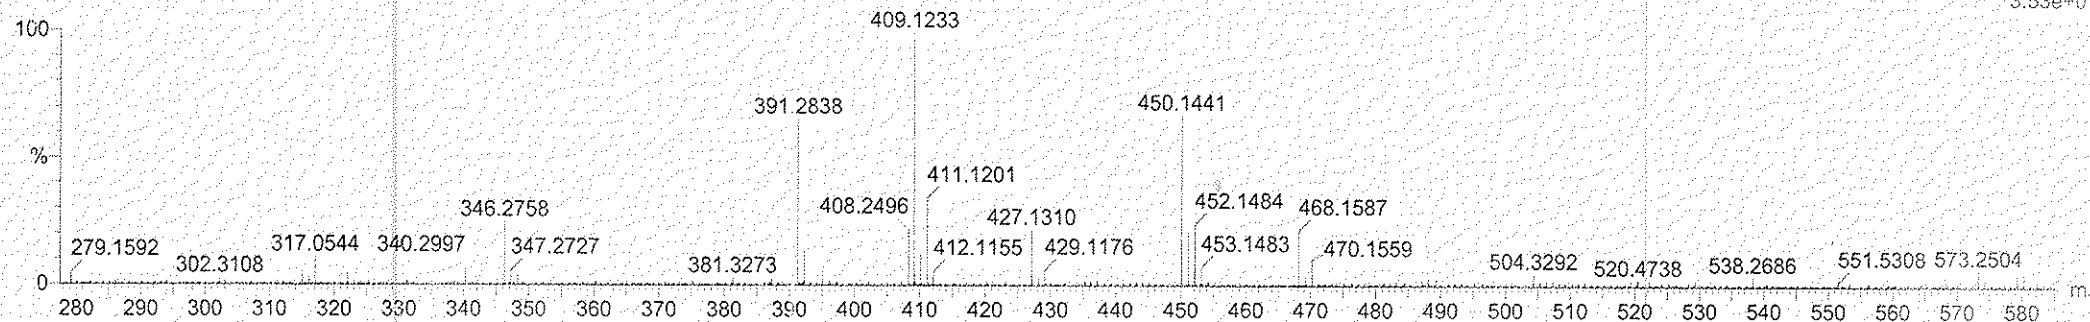

Minimum: -1.0  
Maximum: 5.0 10.0 80.0

| Mass     | Calc. Mass | mDa  | PPM  | DBE  | i-FIT | Formula       |
|----------|------------|------|------|------|-------|---------------|
| 427.1310 | 427.1312   | -0.2 | -0.5 | 12.5 | 10.0  | C24 H24 O5 Cl |
|          | 427.1334   | -2.4 | -5.6 | 21.5 | 18.9  | C30 H19 O3    |

TDC-213 BASE in DMSO

NMR-400

AR.No:ME1010/1323

Analyst:Haribabu.R

Date: 15 th Oct 2010

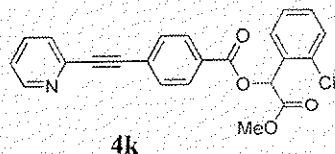

4k

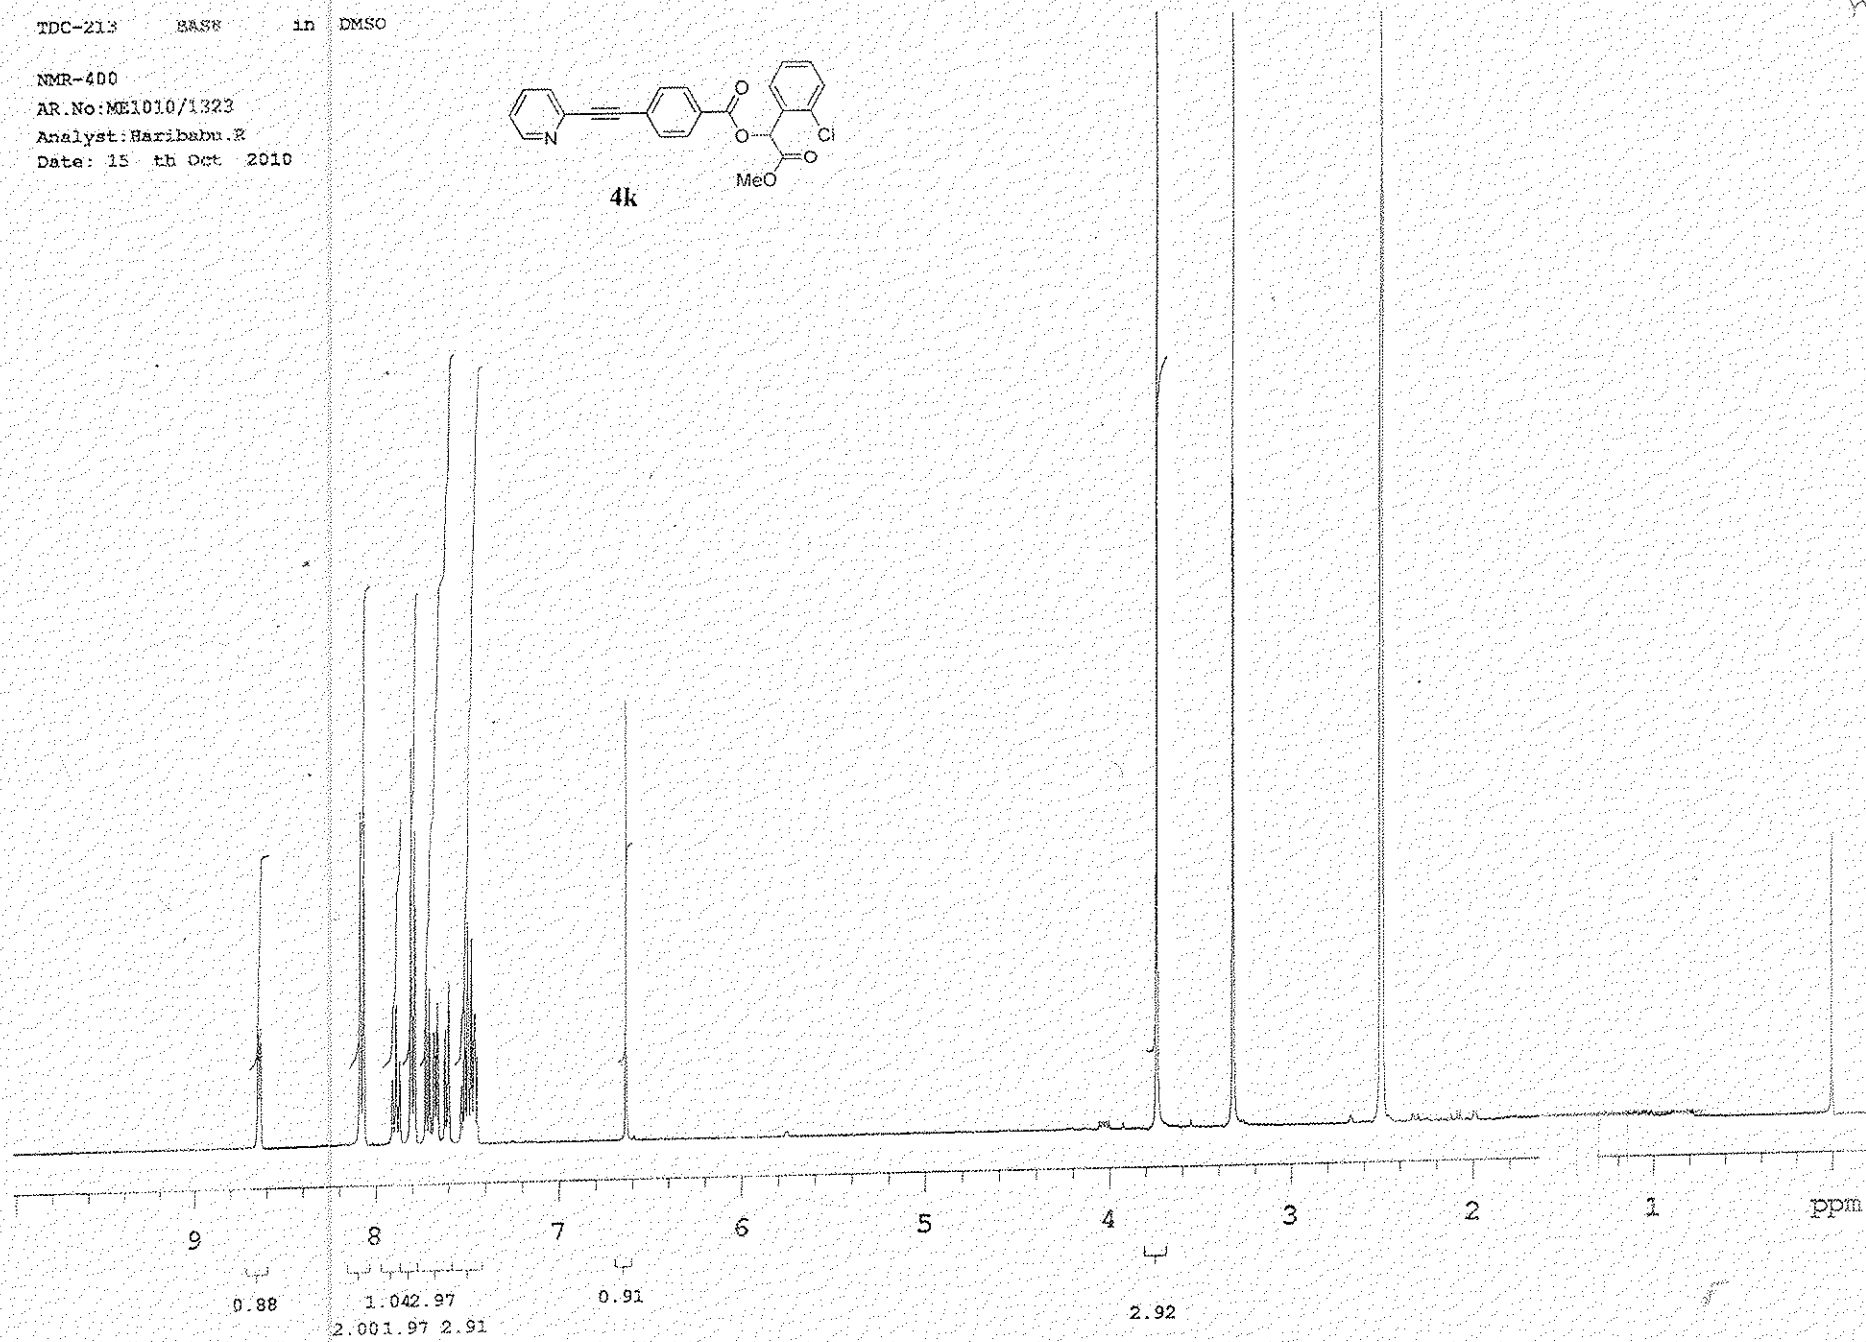



TDC-213 BASE in DMSO

NMR-400

AR.No:ME1010/1835

Analyst: Shruthi

Date: 21st Oct. 2010

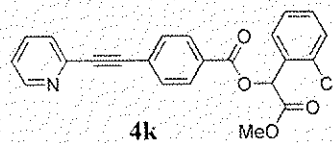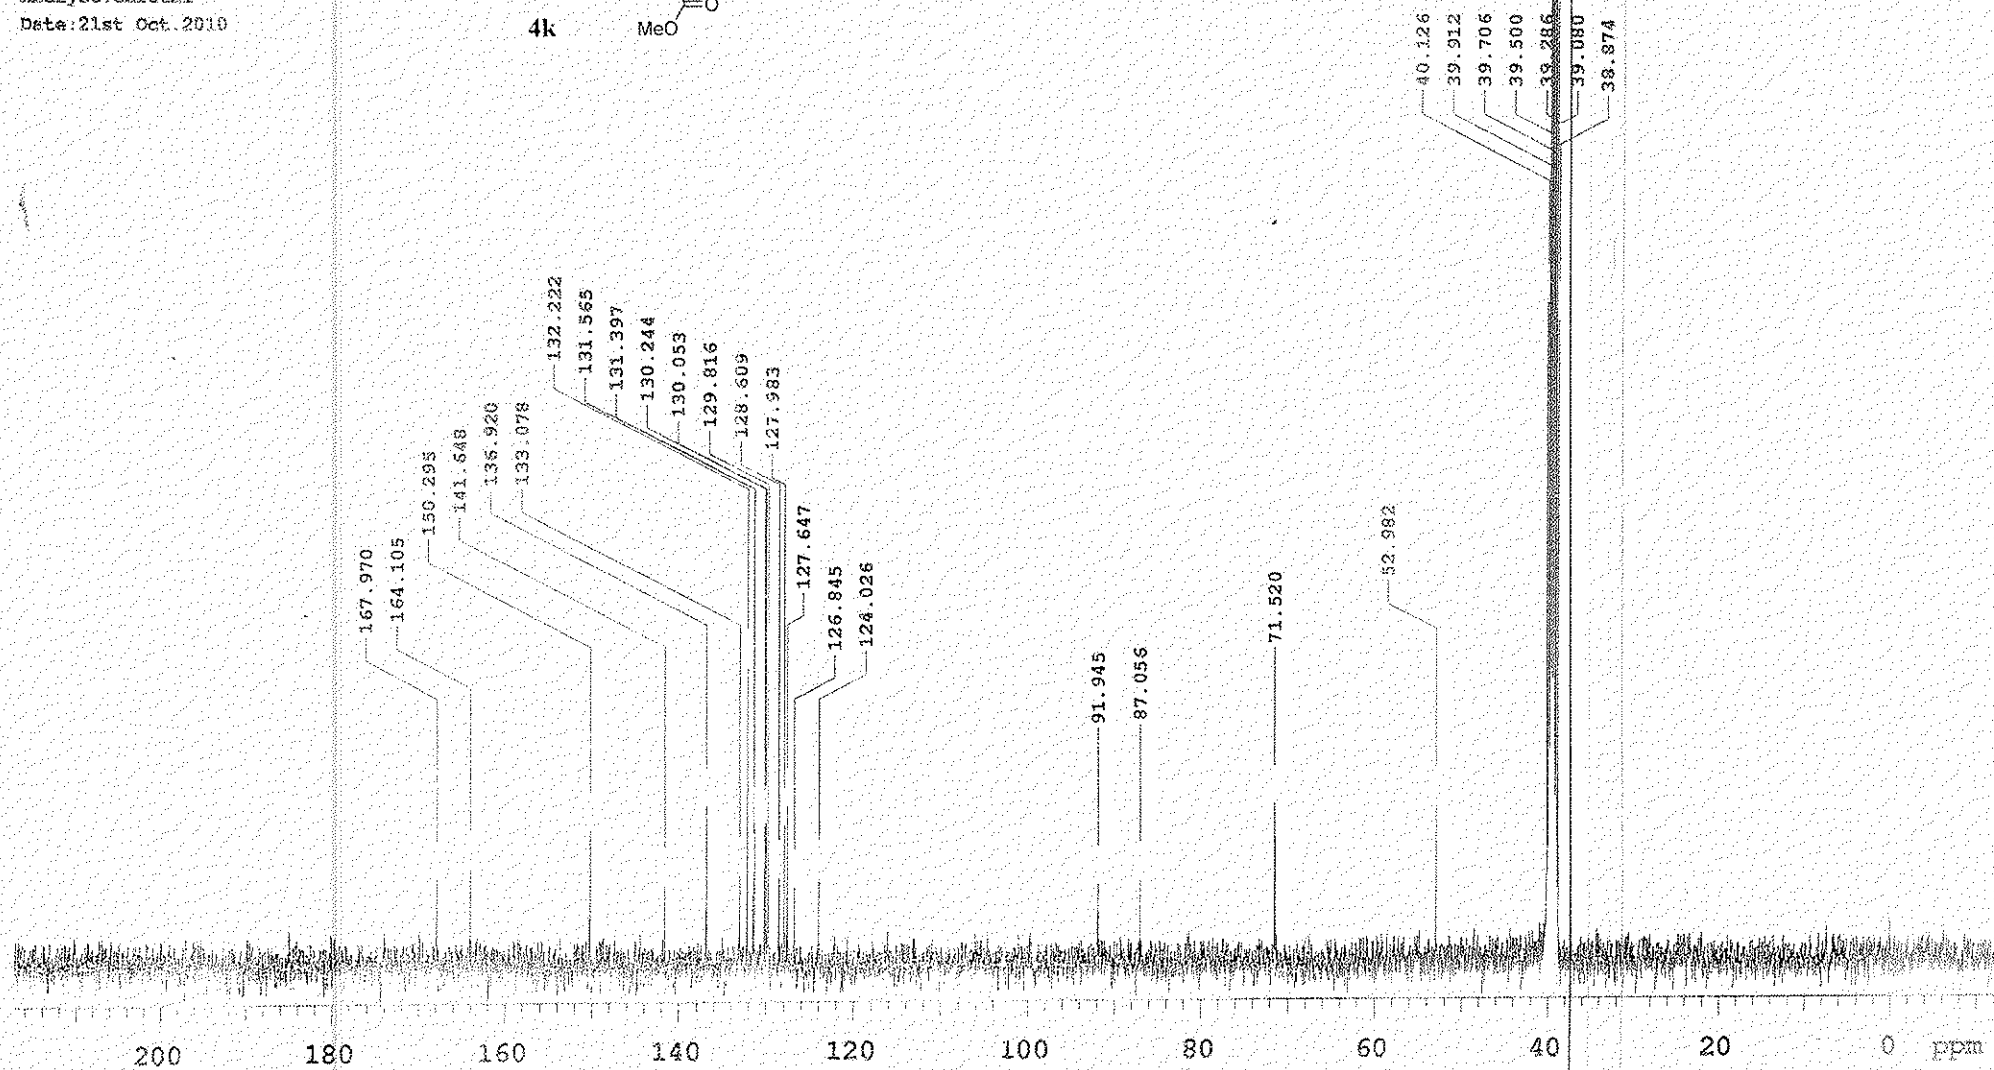

76  
L1110

BAS8

UT1010\_203 23 (0.427) Cm (22:29-81:92)

29/10/10  
1: TOF MS ES+  
3.04e4

CNYL BAS8 TDC-213  
A.R.No.UT1010\203  
Kaviraj

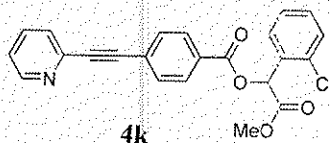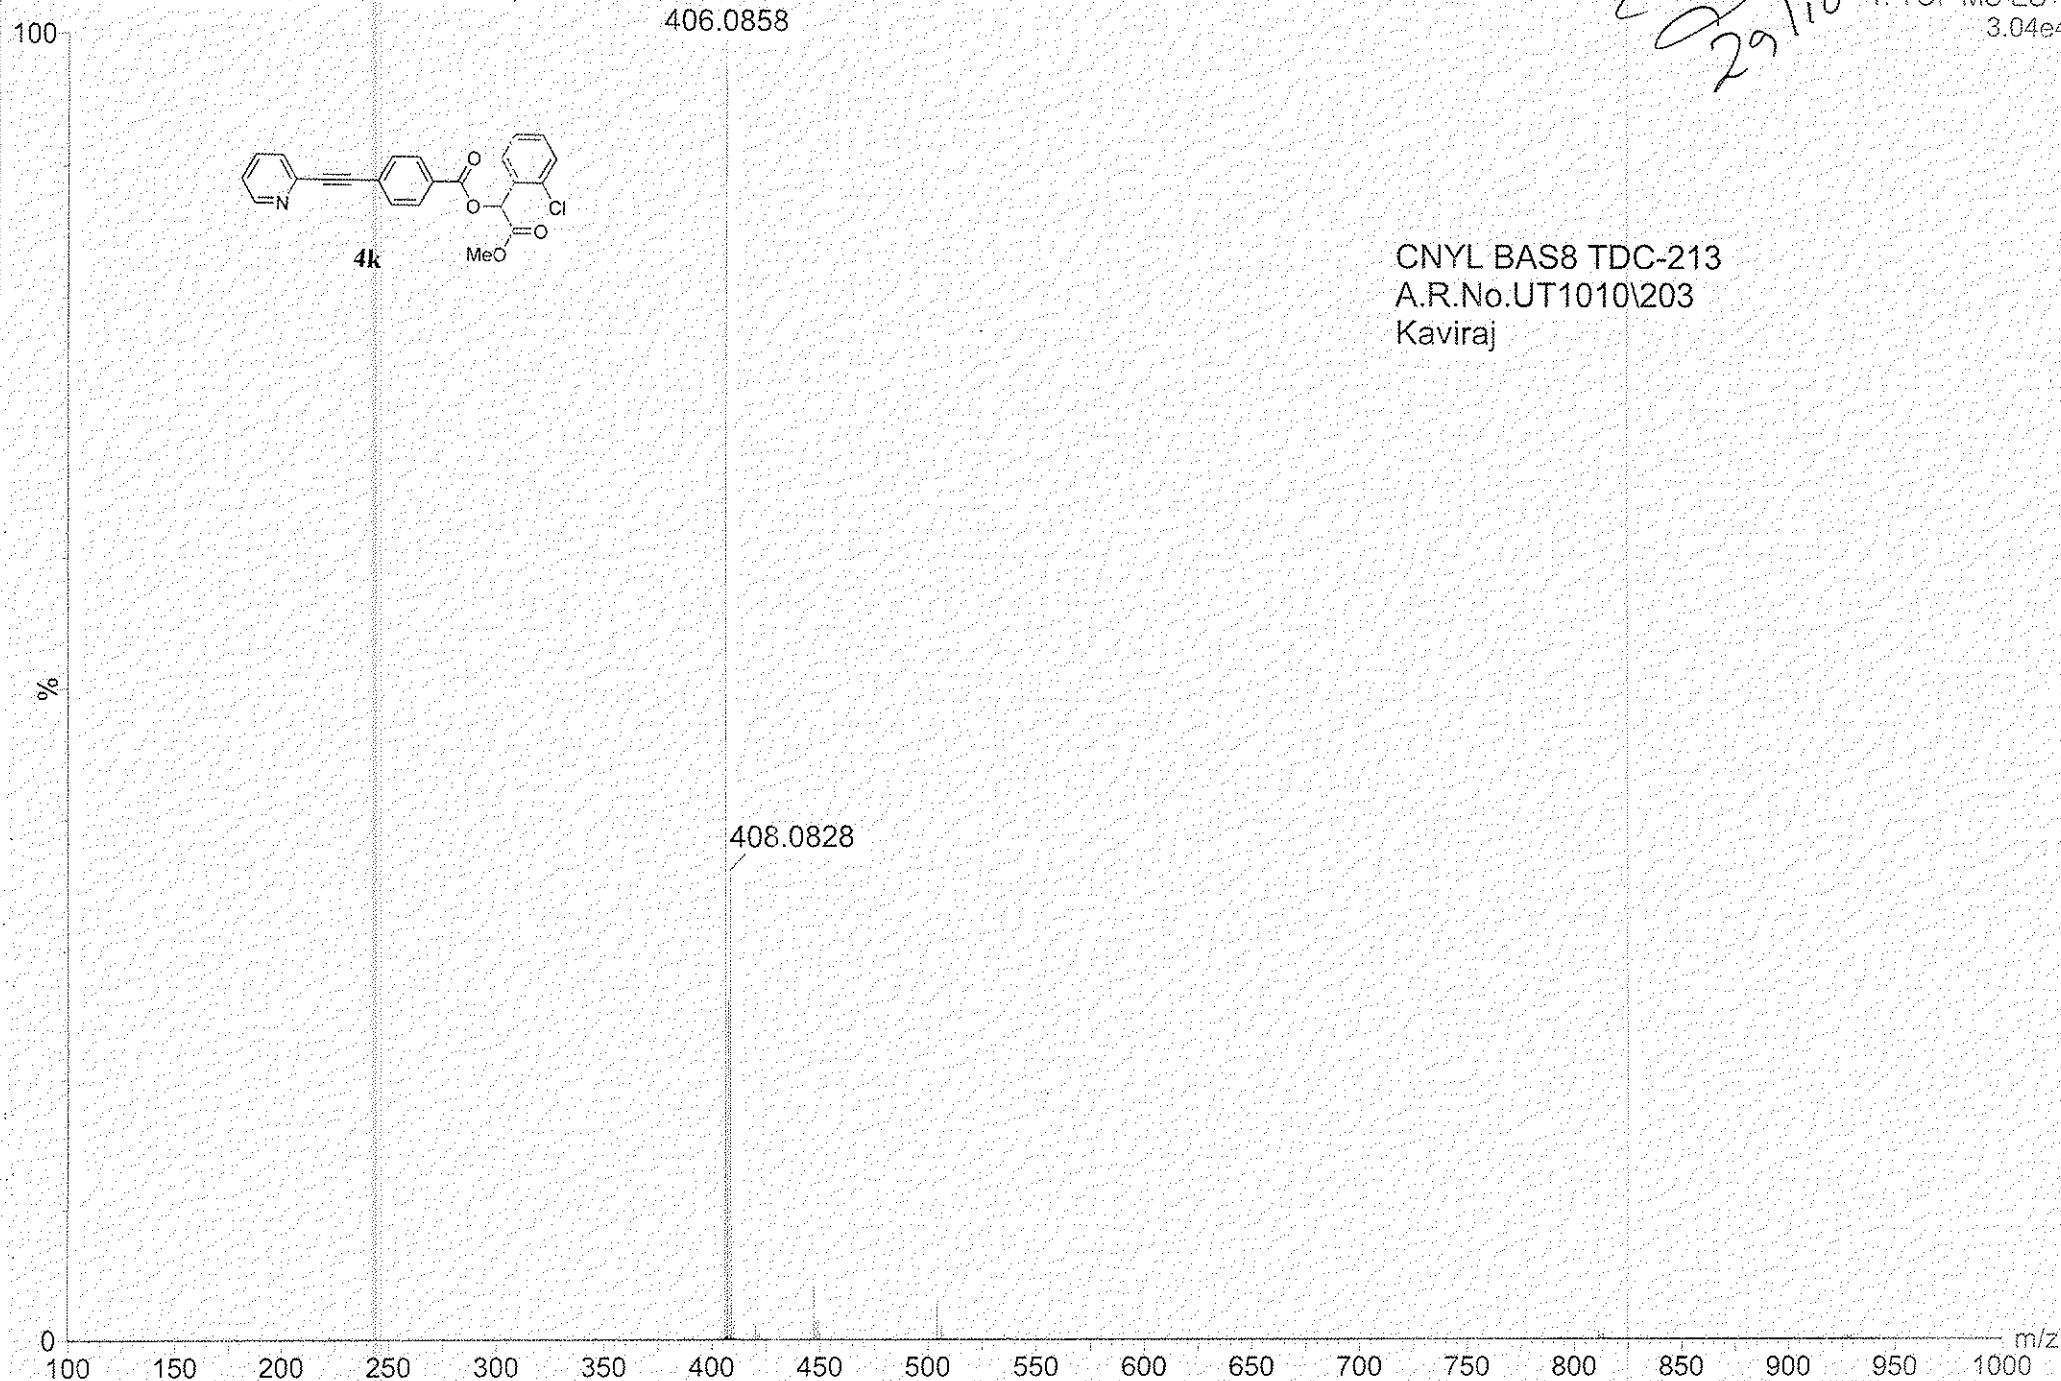

## Single Mass Analysis

Tolerance = 5.0 PPM / DBE: min = -1.0, max = 80.0

Element prediction: Off

Number of isotope peaks used for -FIT = 3

Monoisotopic Mass, Even Electron Ions

269 formula(e) evaluated with 2 results within limits (up to 4 closest results for each mass)

Elements Used:

C: 0-45 H: 0-70 N: 0-3 O: 0-6 Cl: 0-1

RTS8

U11010\_203 23 (0.427) Cm (22:29-81:92)

1: TOF MS ES  
3.04e+0

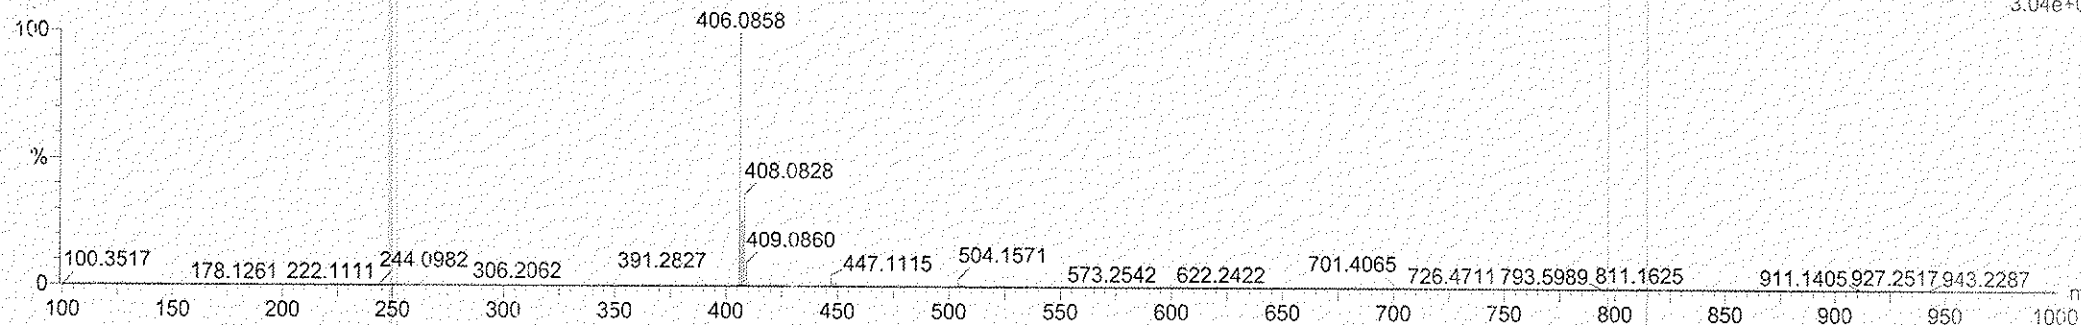

Minimum: -1.0  
Maximum: 5.0 5.0 80.0

| Mass     | Calc. Mass | mDa  | PPM  | DBE  | i-FIT  | Formula         |
|----------|------------|------|------|------|--------|-----------------|
| 406.0858 | 406.0846   | 1.2  | 3.0  | 15.5 | 1.0    | C23 H17 N O4 Cl |
|          | 406.0868   | -1.0 | -2.5 | 24.5 | 4185.2 | C29 H12 N O2    |

TDC-213 CNYL BASN in DMSO

NMR-400

AR.No:ME1010/1556

Analyst:Haribabu.R

Date: 19<sup>th</sup> Oct 2010

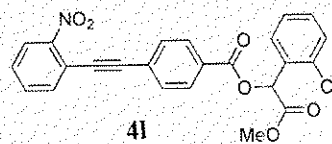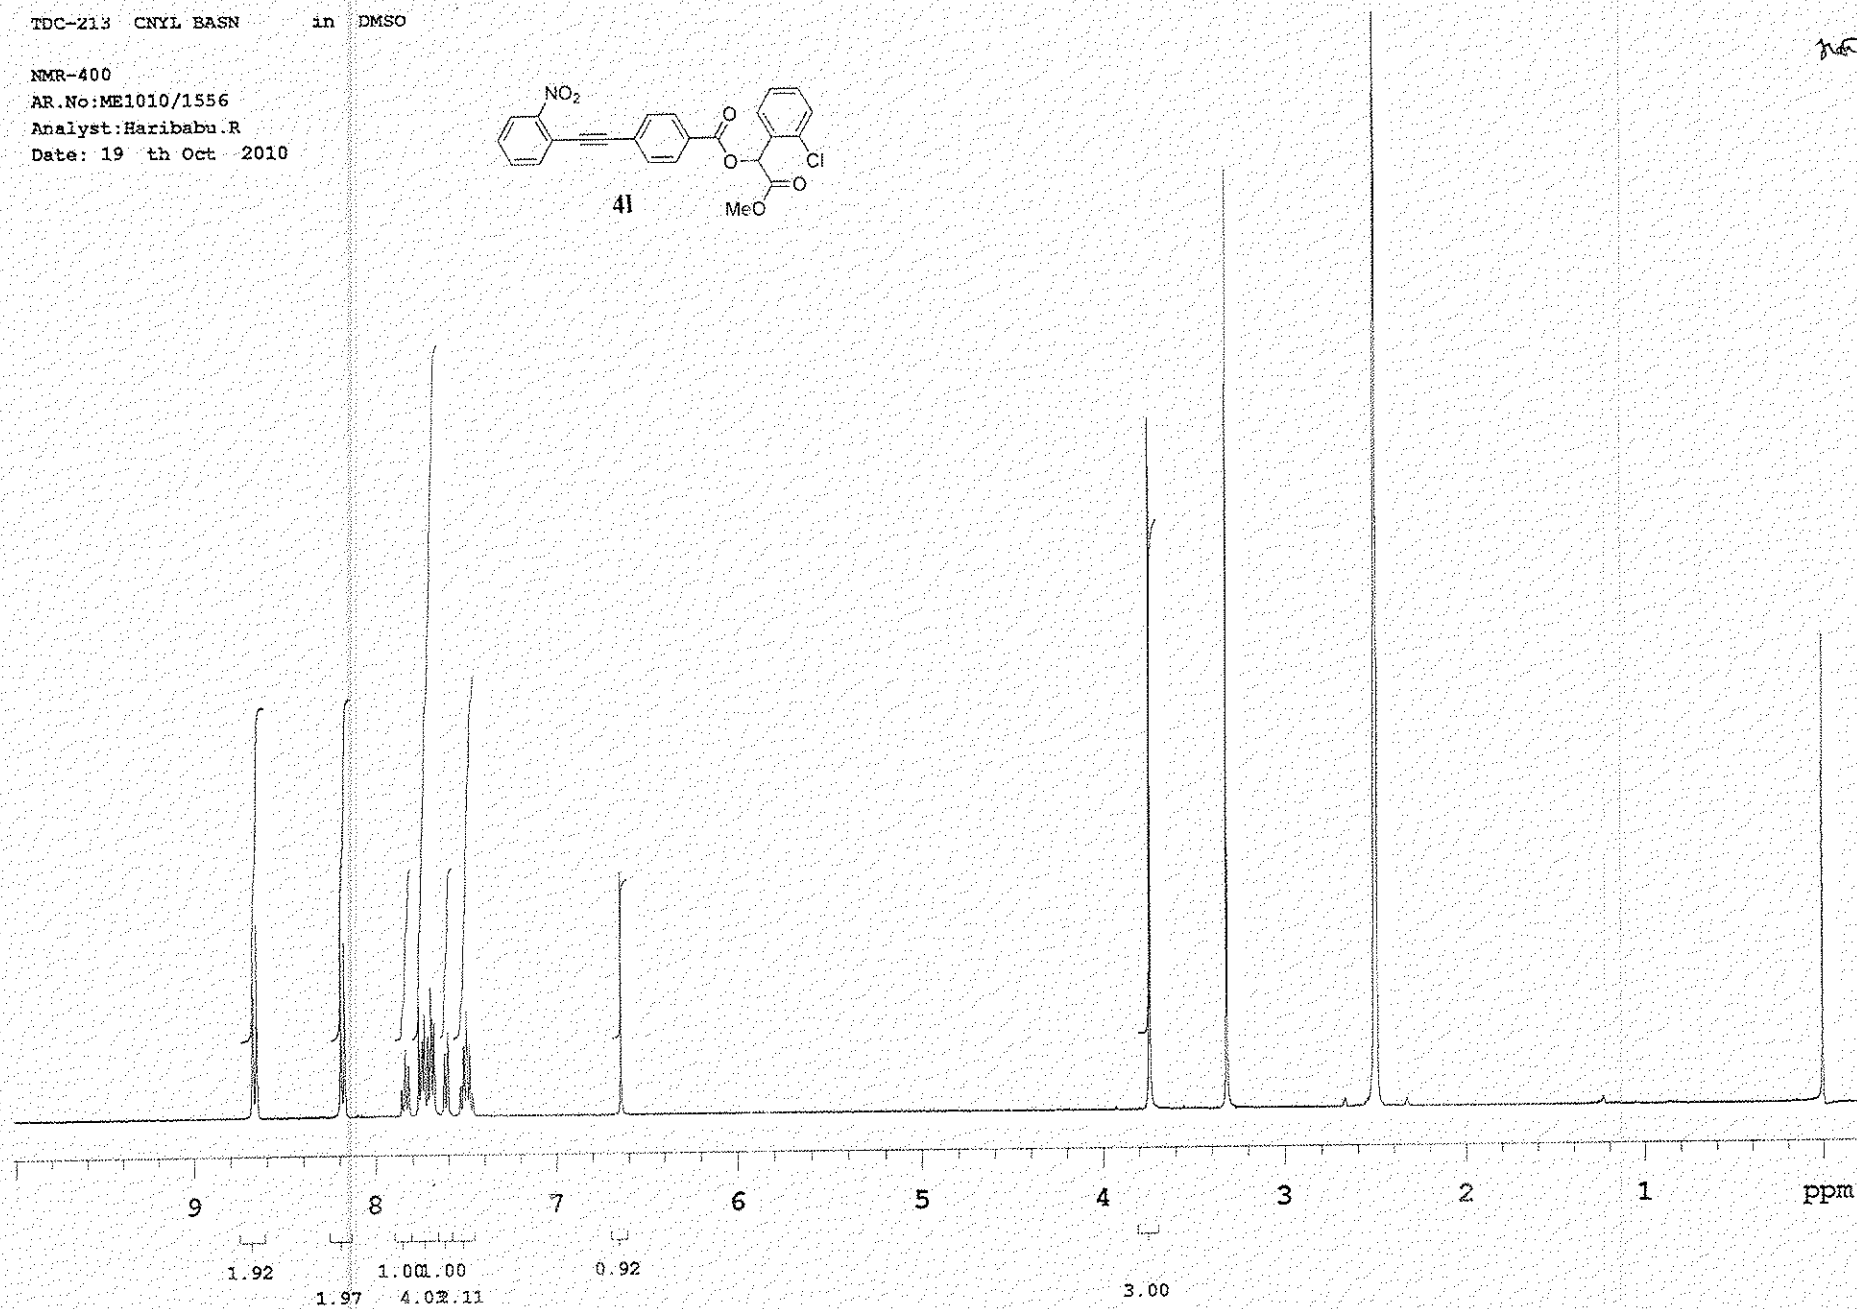



TDC-213 BASN  
NMR-400  
AR.No:ME1210/1978  
Analyst:Haribabu.R  
Date: 21st Dec. 2010

in DMSO

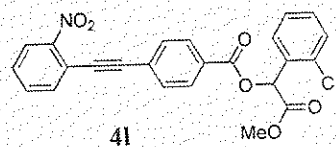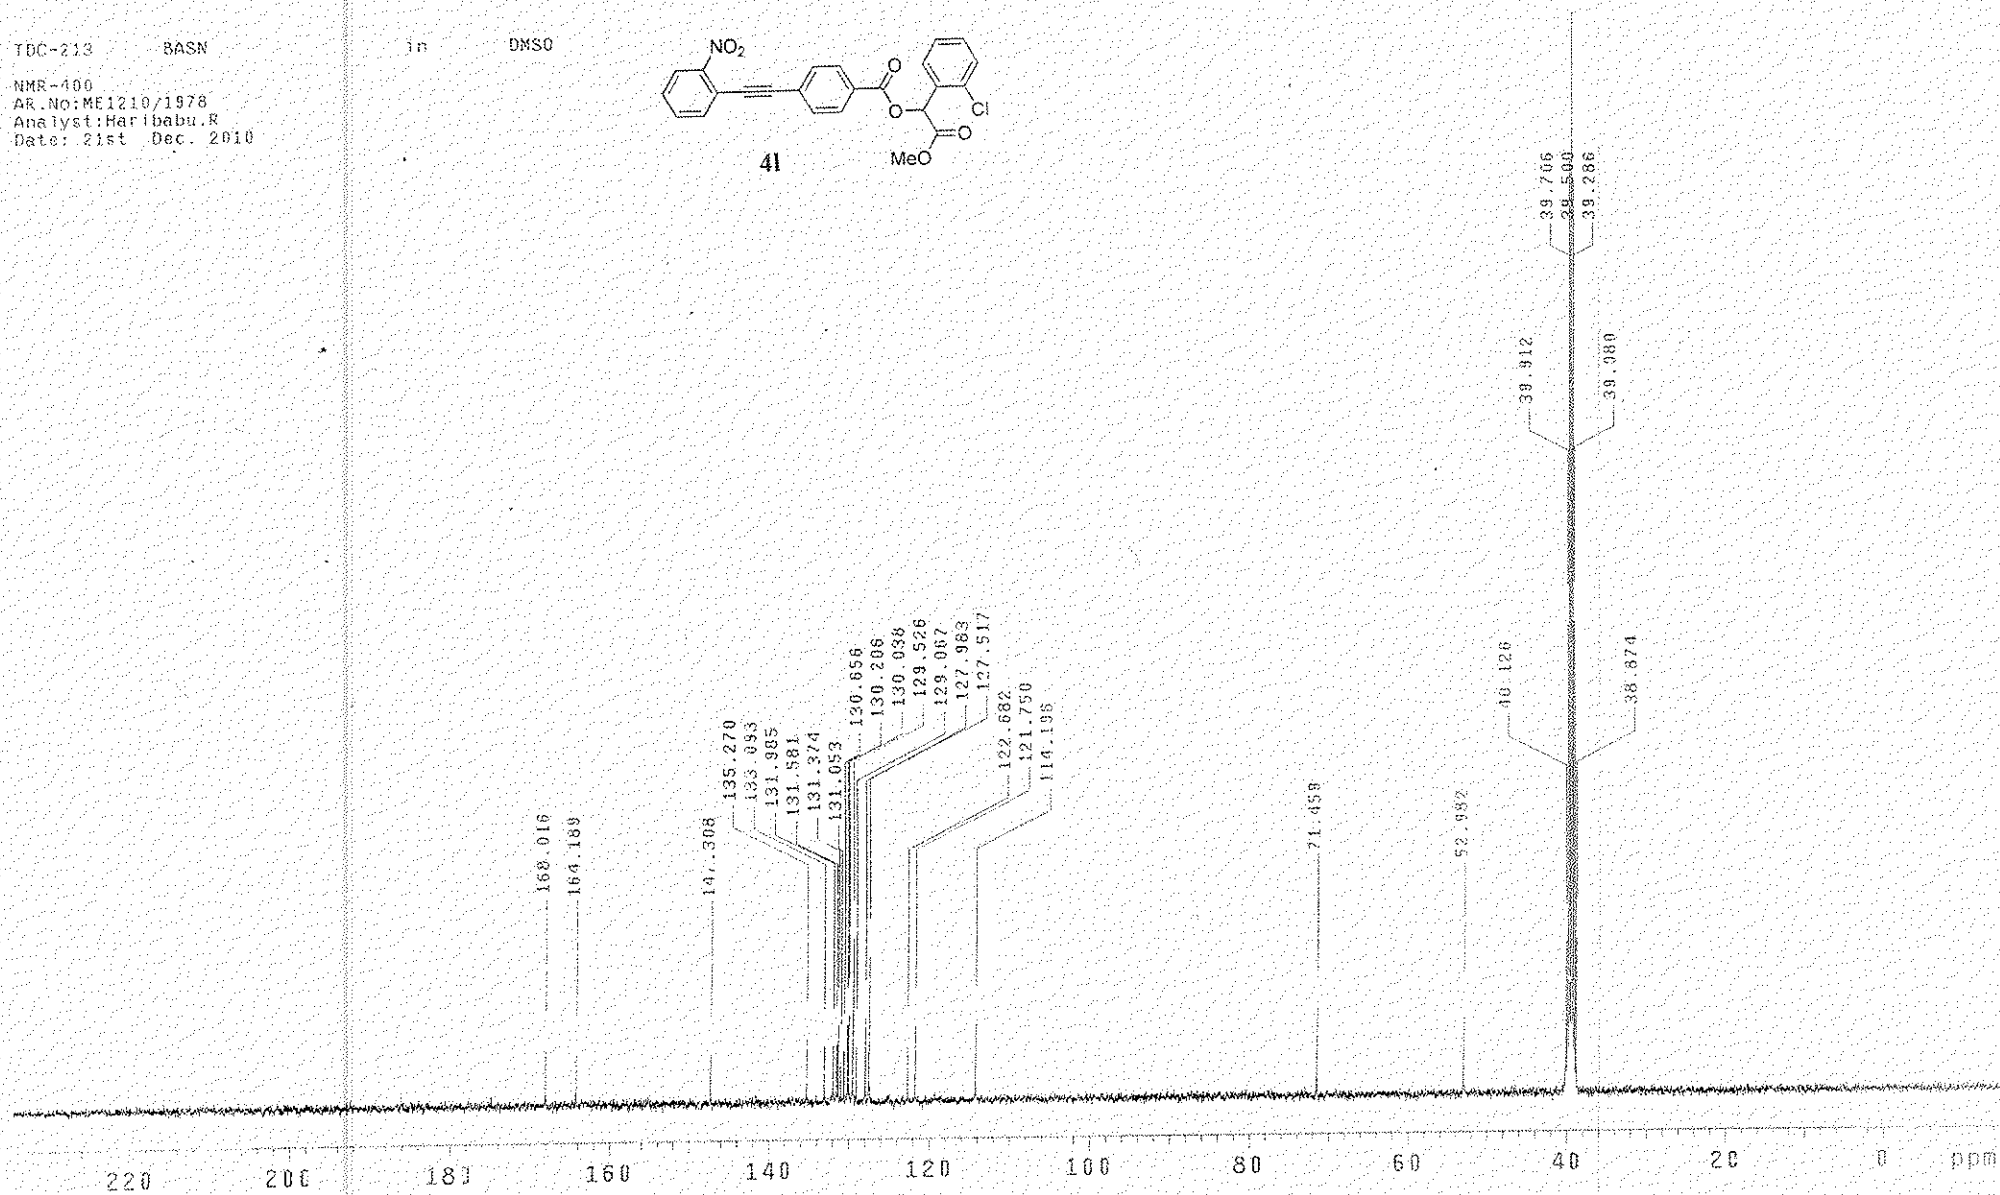

har  
21/12

BASN

UT1010\_204 22 (0.413) Cm (21:24-85:92)

29/10/10

1: TOF MS ES+  
188

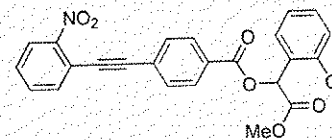

4l

CNYL BASN TDC-213  
A.R.No.UT1010\204  
Kaviraj

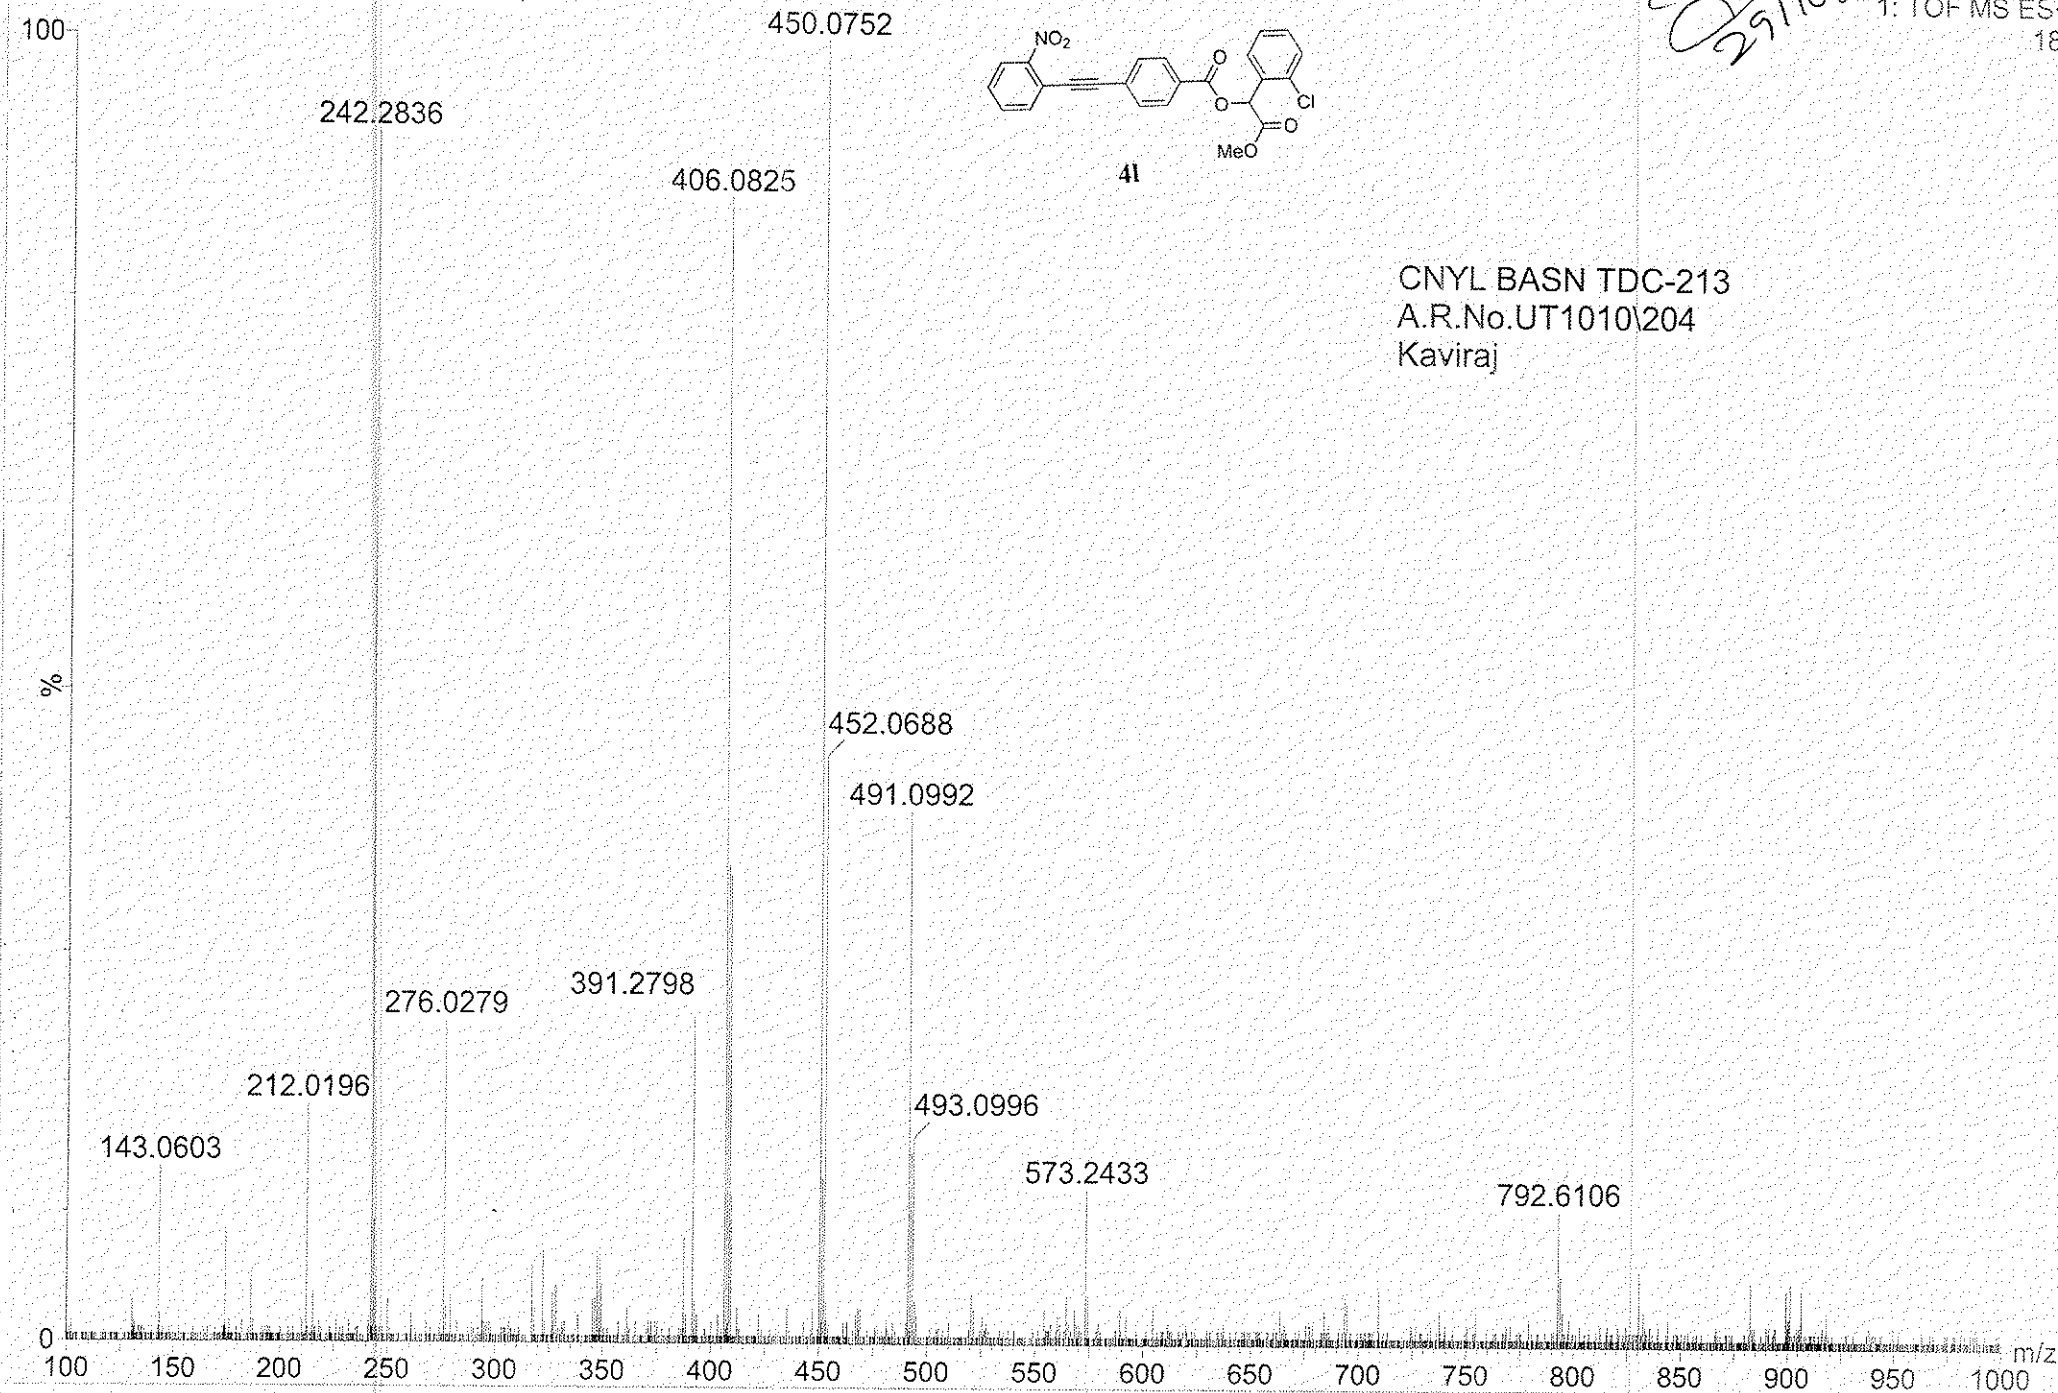

## Single Mass Analysis

Tolerance = 5.0 PPM / DBE: min = -1.0, max = 80.0

Element prediction: Off

Number of isotope peaks used for i-FIT = 3

Monoisotopic Mass, Even Electron Ions

300 formula(e) evaluated with 2 results within limits (up to 4 closest results for each mass)

Elements Used:

C: 0-45 H: 0-70 N: 0-3 O: 0-6 Cl: 0-1

BASN

U11010\_204 22 (0.413) Cm (21:24-85:92)

1: TOF MS ES+  
1.88e+002

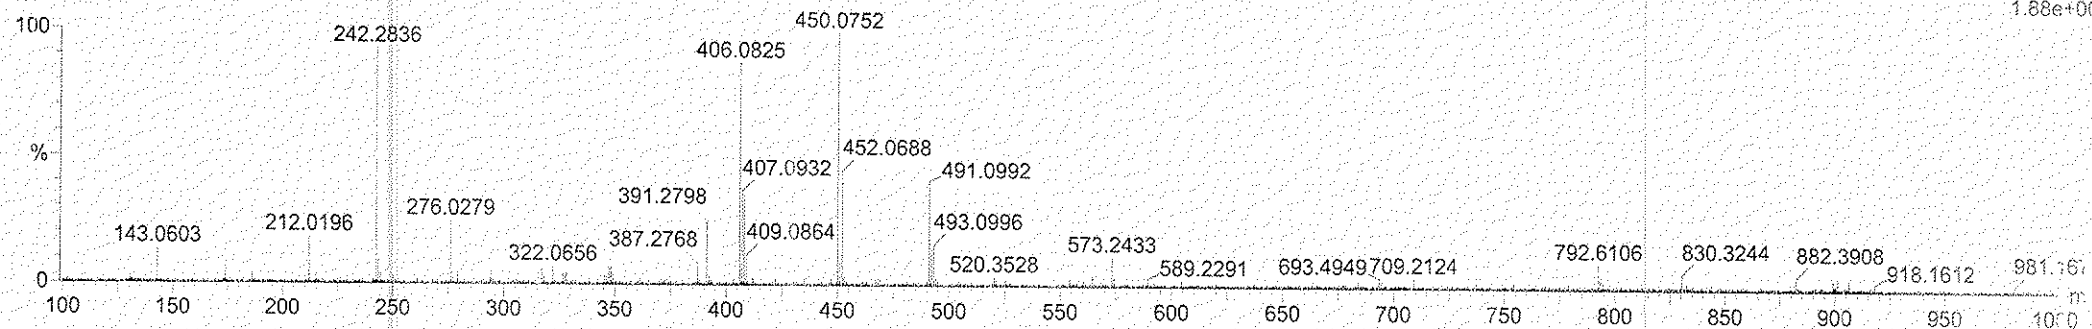

Minimum: -1.0  
Maximum: 5.0 5.0 80.0

| Mass     | Calc. Mass | mDa  | PPM  | DBE  | i-FIT | Formula         |
|----------|------------|------|------|------|-------|-----------------|
| 450.0752 | 450.0744   | 0.8  | 1.8  | 16.5 | 25.8  | C24 H17 N O6 Cl |
|          | 450.0766   | -1.4 | -3.1 | 25.5 | 63.9  | C30 H12 N O4    |

TDC-213 EAST in DMSO

NMR-400

AR.No:ME1010/1877

Analyst:Haribabu.R

Date: 22 nd Oct 2010

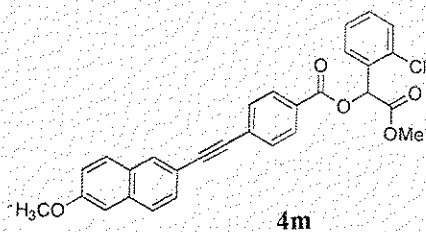

for  $\frac{16}{21/10/10}$

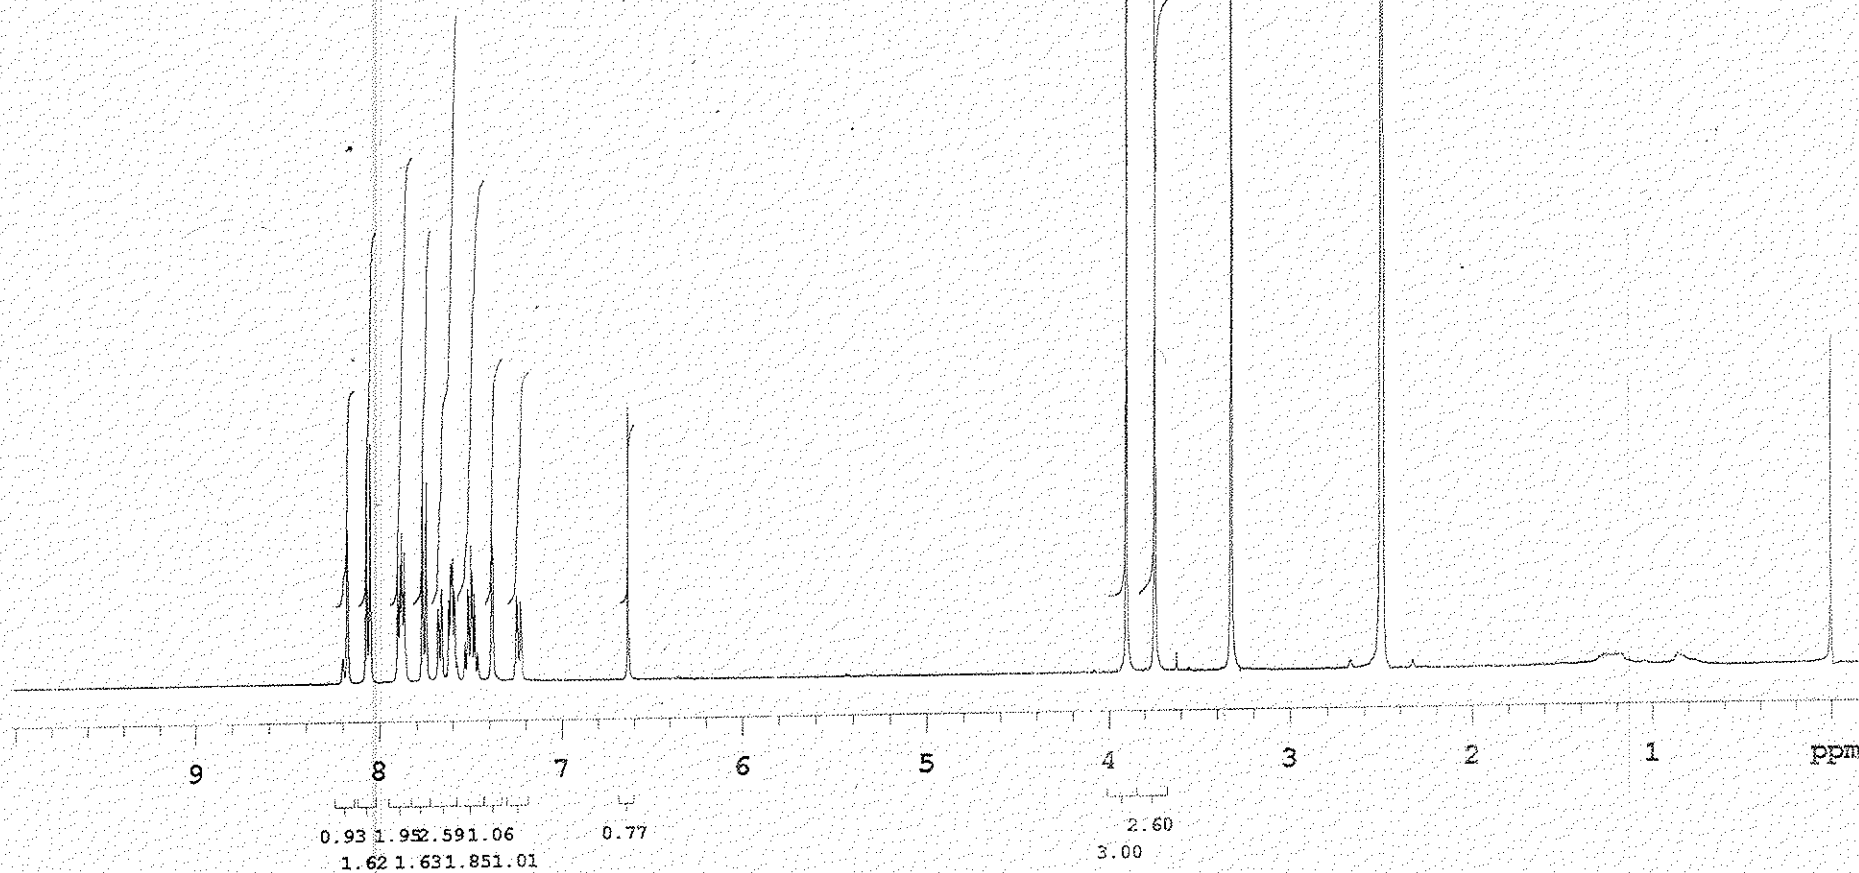



TDC-213 BAST in DMSO

NMR-400

AR.No:ME1010/2352

Analyst:Shruthi

Date: 27 th Oct 2010

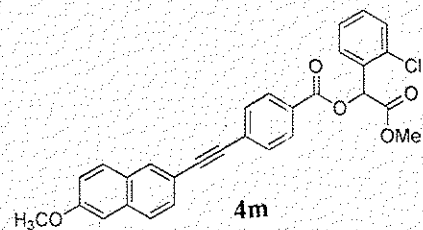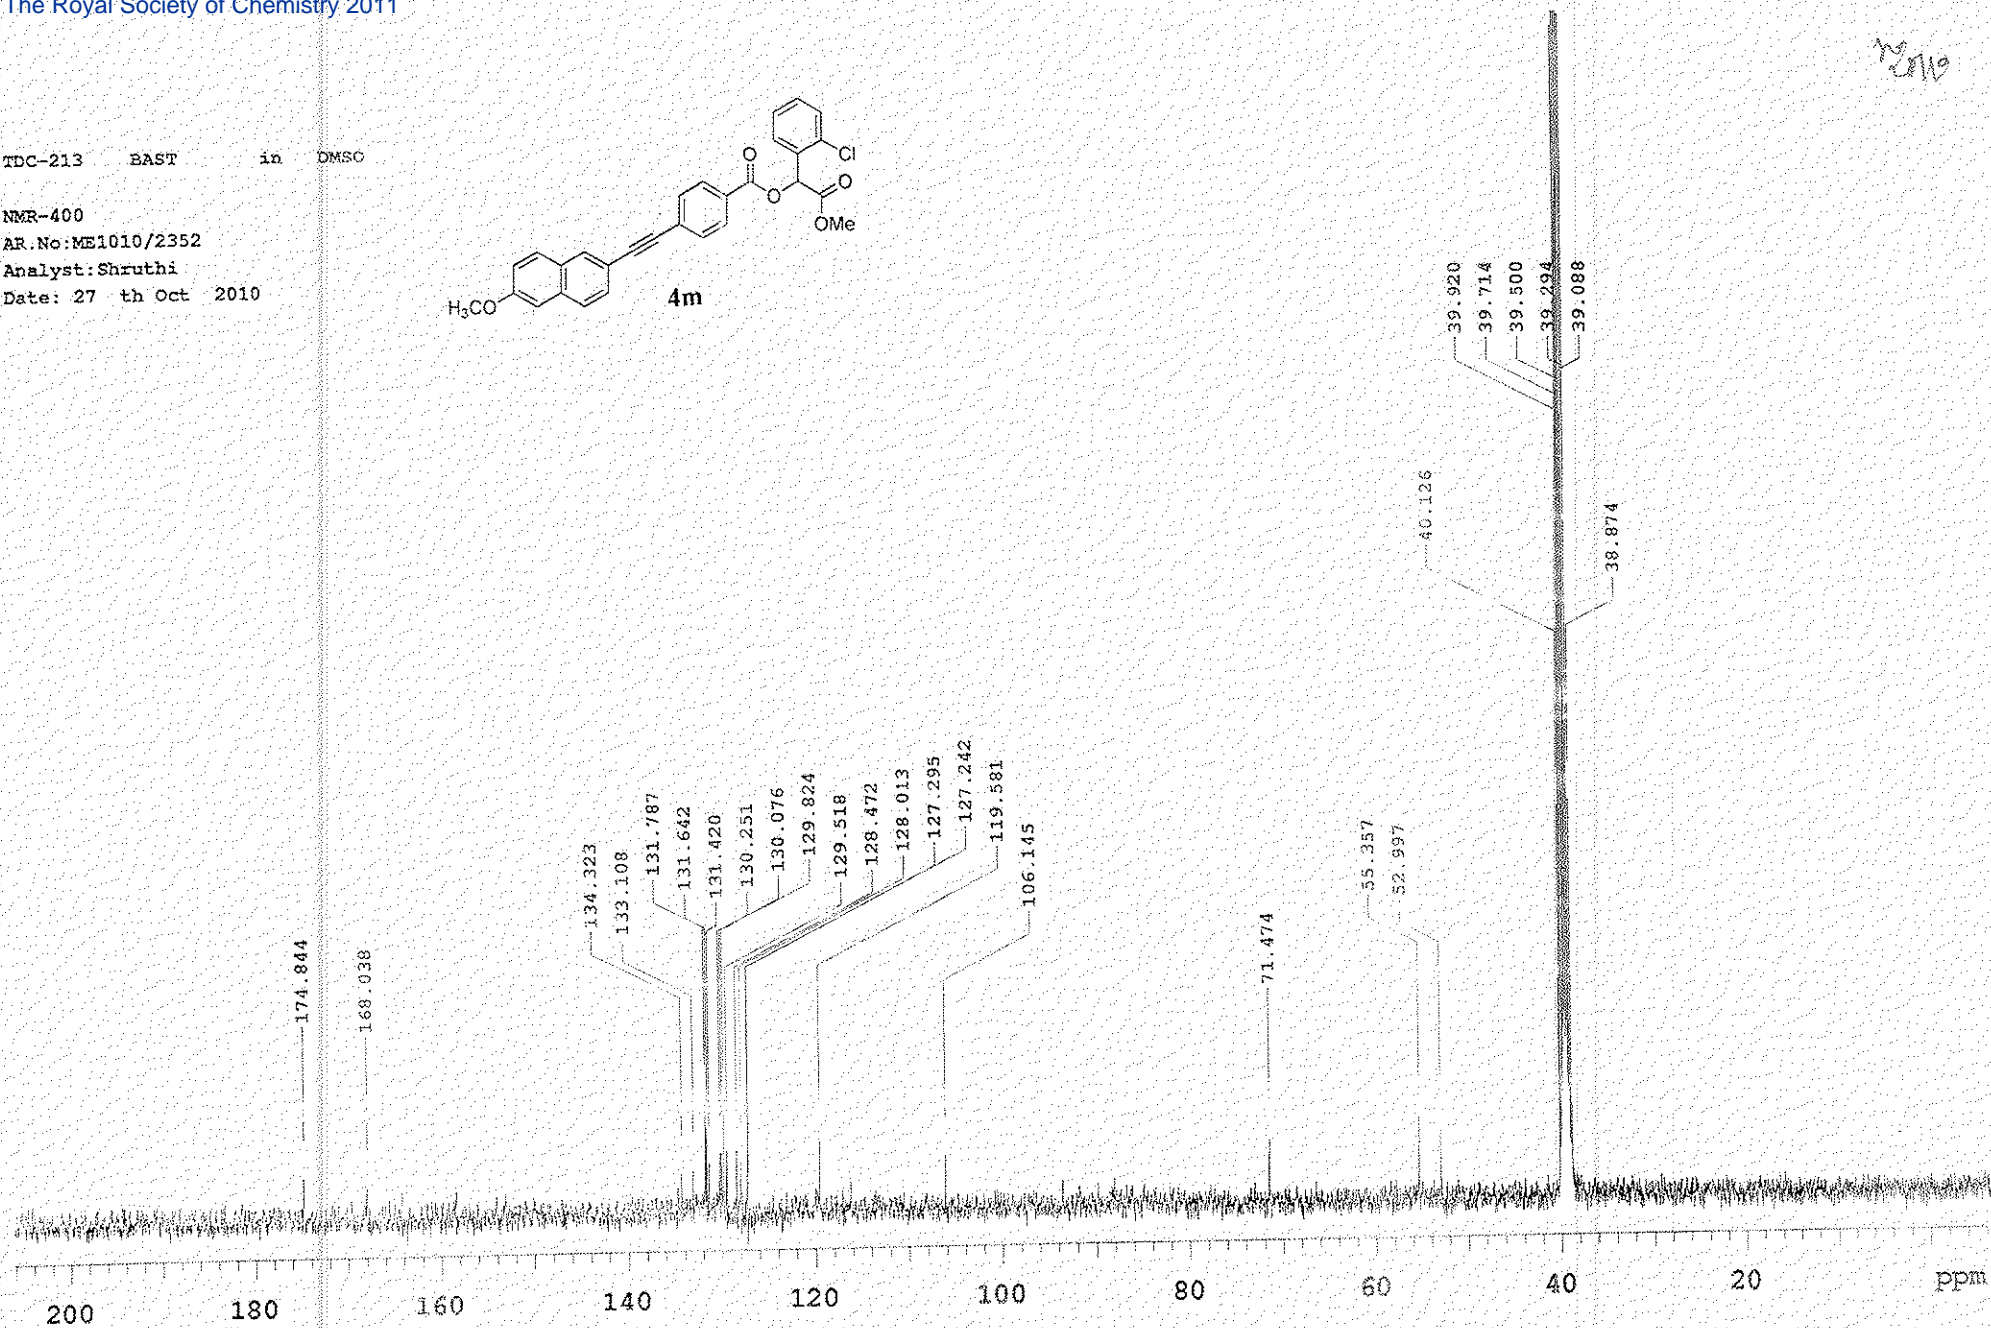

no  
2010

BAST

UT1010\_205 17 (0.324) Cm (17:23-78:87)

408.0821

1: TOF MS ES+  
117

29/10/10

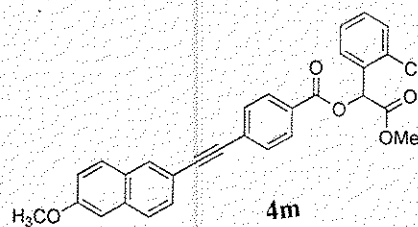

4m

CNYL BAST TDC-213  
A.R.No.UT1010\205  
Kaviraj

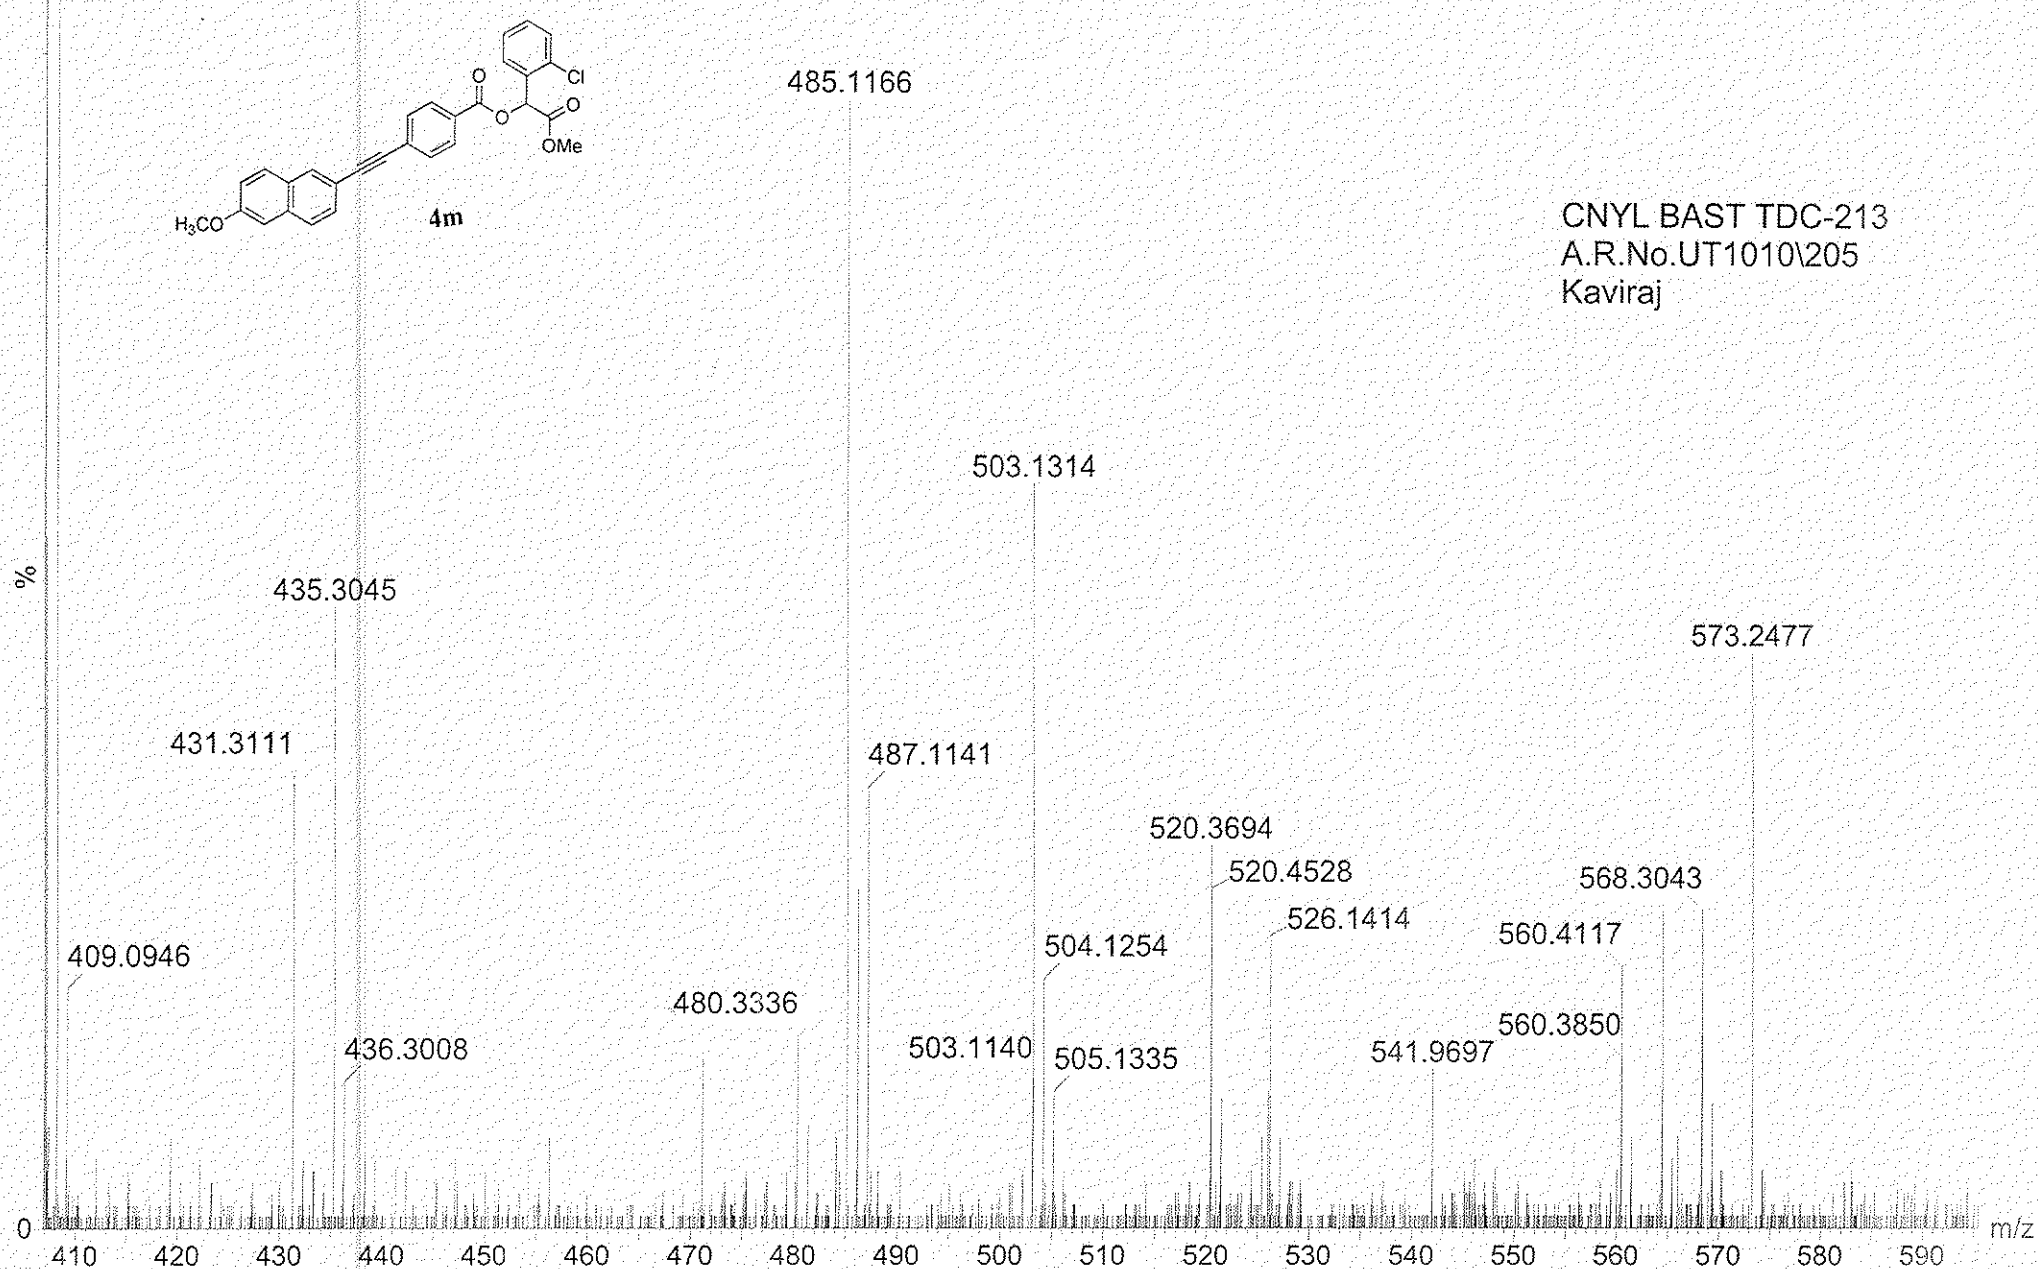

## Single Mass Analysis

Tolerance = 5.0 PPM / DBE: min = -1.0, max = 80.0

Element prediction: Off

Number of isotope peaks used for i-FIT = 3

Monoisotopic Mass, Even Electron Ions

318 formula(e) evaluated with 2 results within limits (up to 4 closest results for each mass)

Elements Used:

C: 0-45 H: 0-70 N: 0-3 O: 0-6 Cl: 0-1

BAST

UT1010\_205 17 (0.324) Cm (17:23-78:87)

1: TOF MS ES  
1.17e+0

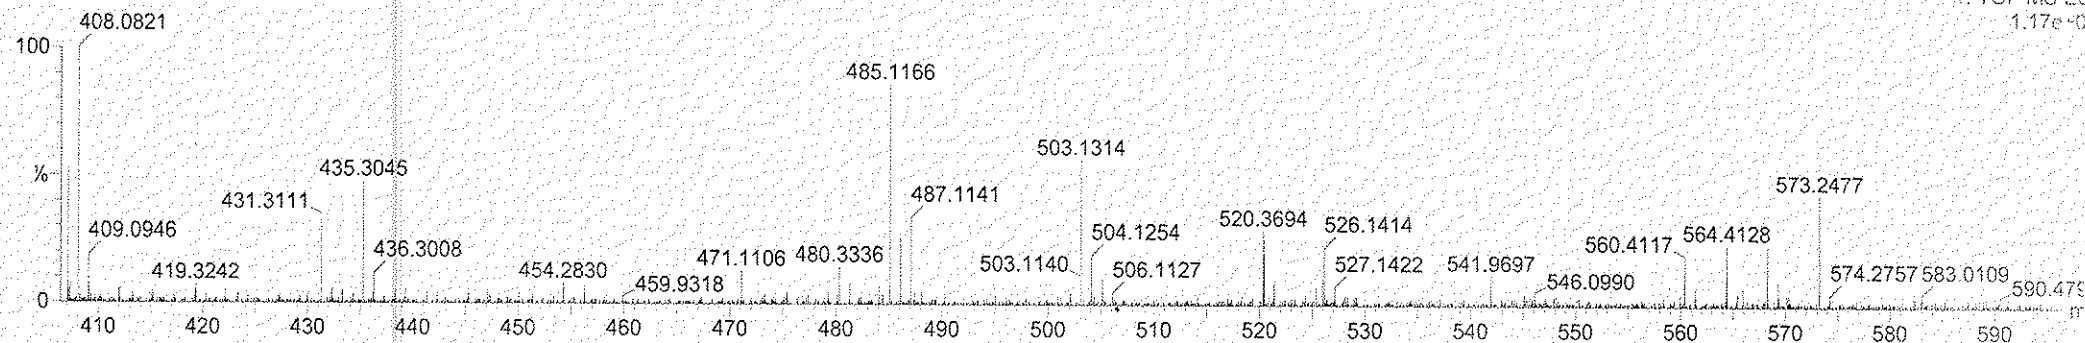

Minimum: -1.0  
Maximum: 5.0 5.0 80.0

| Mass     | Calc. Mass | mDa  | PPM  | DBE  | i-FIT | Formula       |
|----------|------------|------|------|------|-------|---------------|
| 485.1166 | 485.1156   | 1.0  | 2.1  | 18.5 | 0.1   | C29 H22 O5 Cl |
|          | 485.1178   | -1.2 | -2.5 | 27.5 | 13.8  | C35 H17 O3    |

NMR-400

AR.No:ME1010/1945

Analyst:Haribabu.R

Date: 22 th Oct 2010

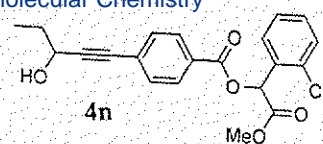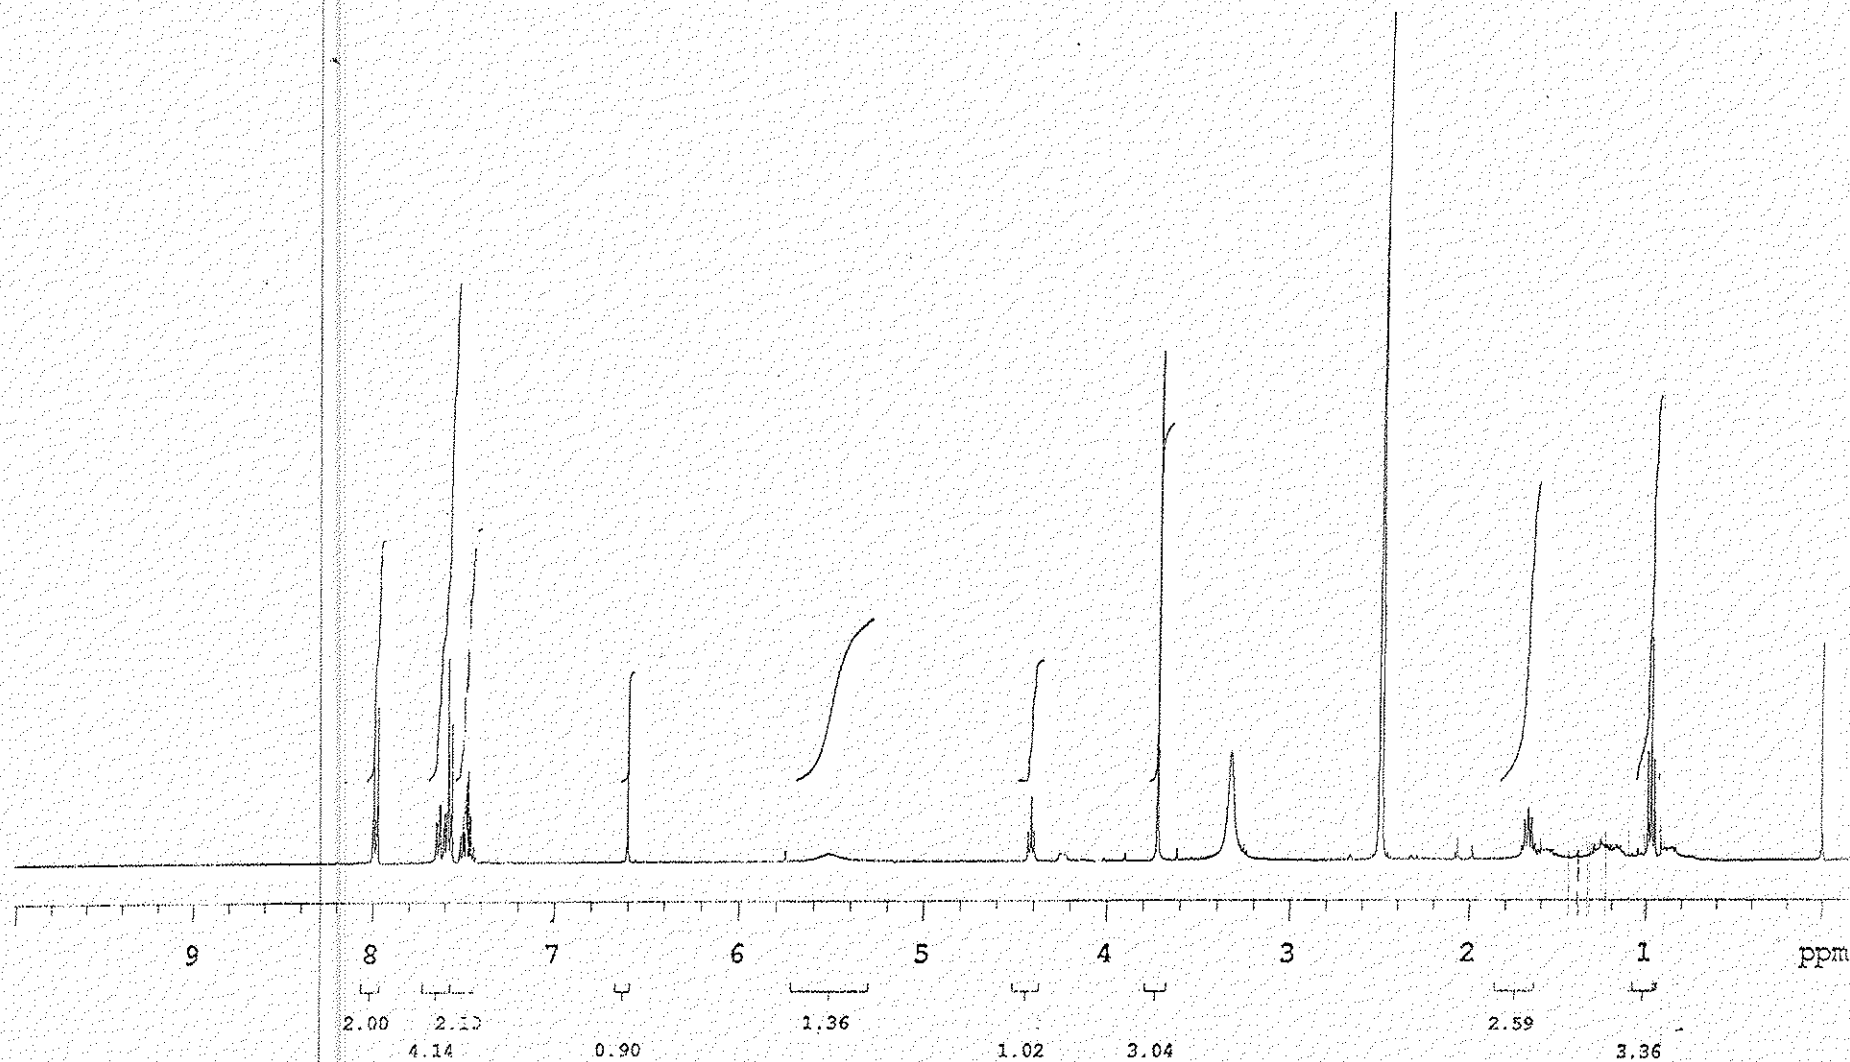



20/12

TDC-213 BASE

1n DMSO

NMR-400  
AR.No:ME1210/992  
Analyst:Haribabu.R  
Date: 10 th Dec. 2010

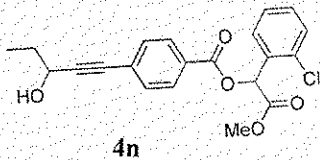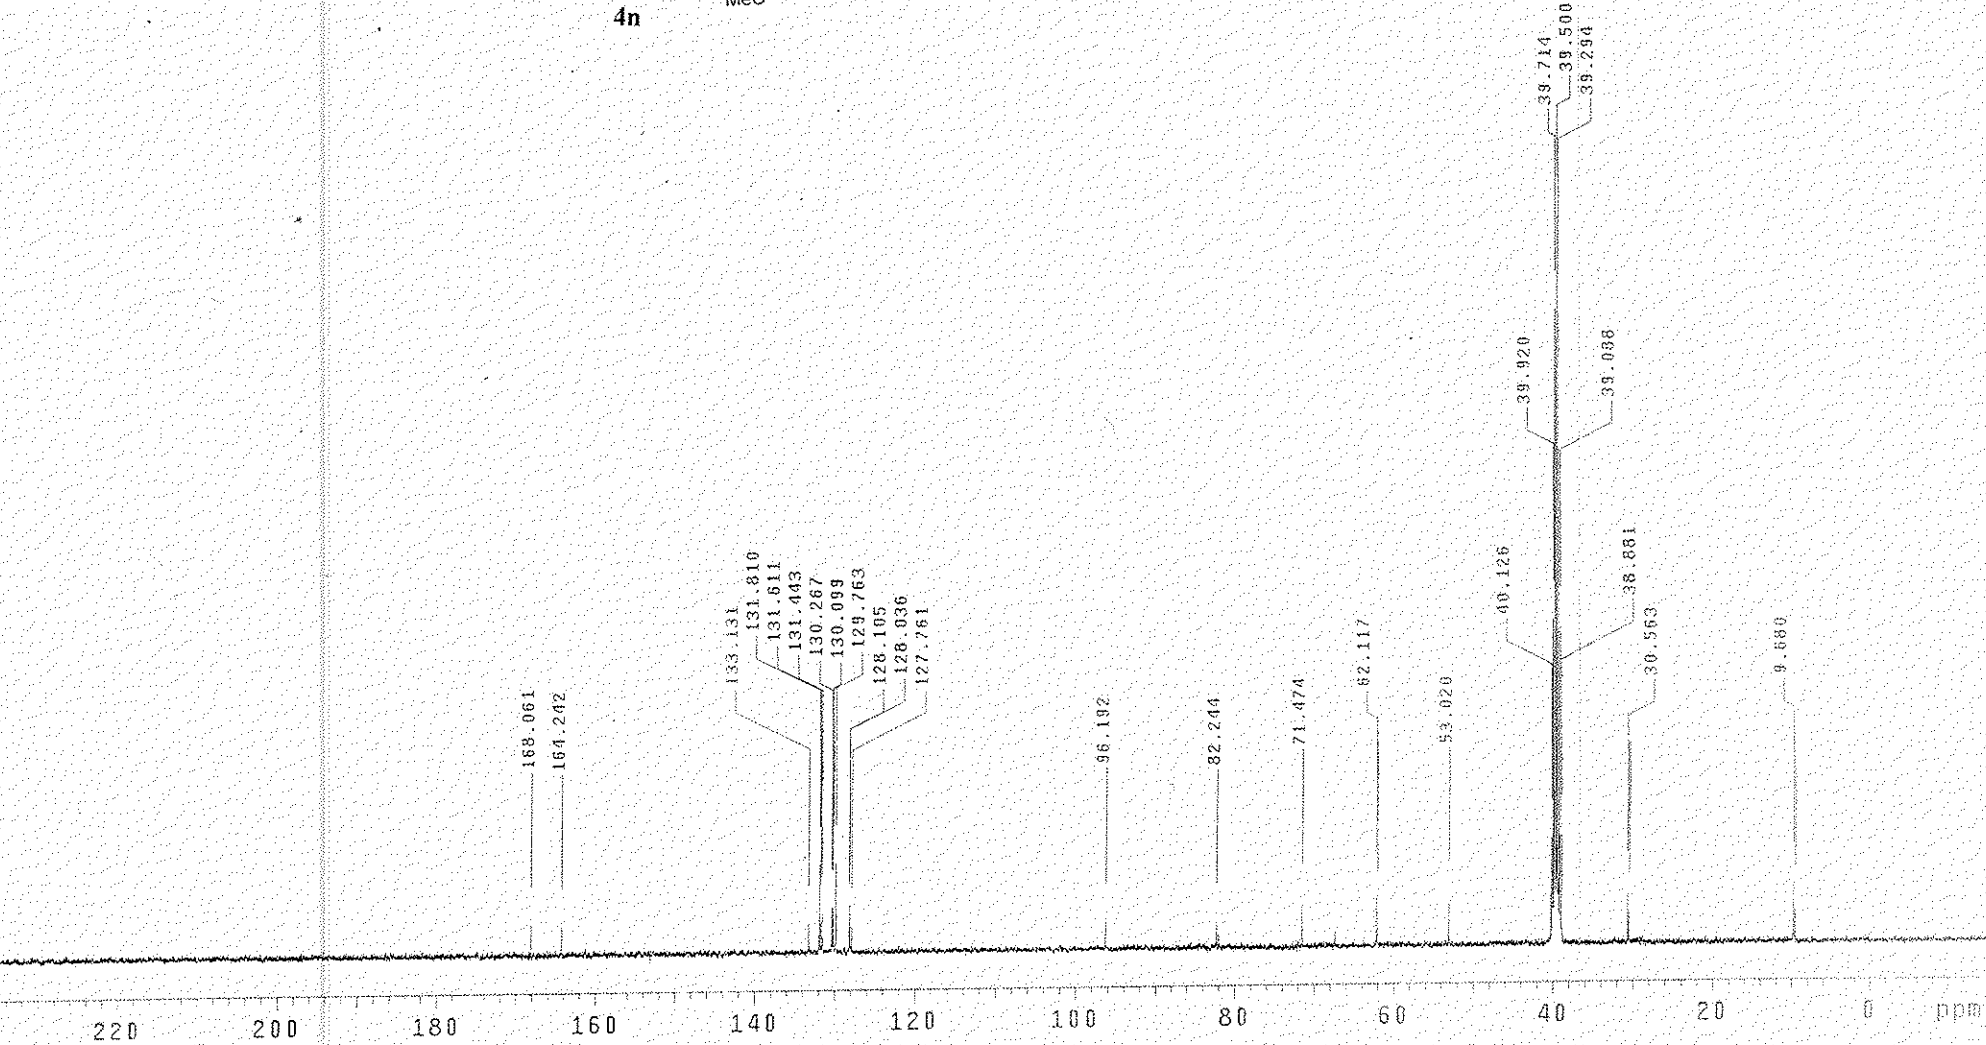

BASE

UT1010\_206 22 (0.413) Cm (27:26-86:95)

29/10/10

1: TOF MS ES+  
267

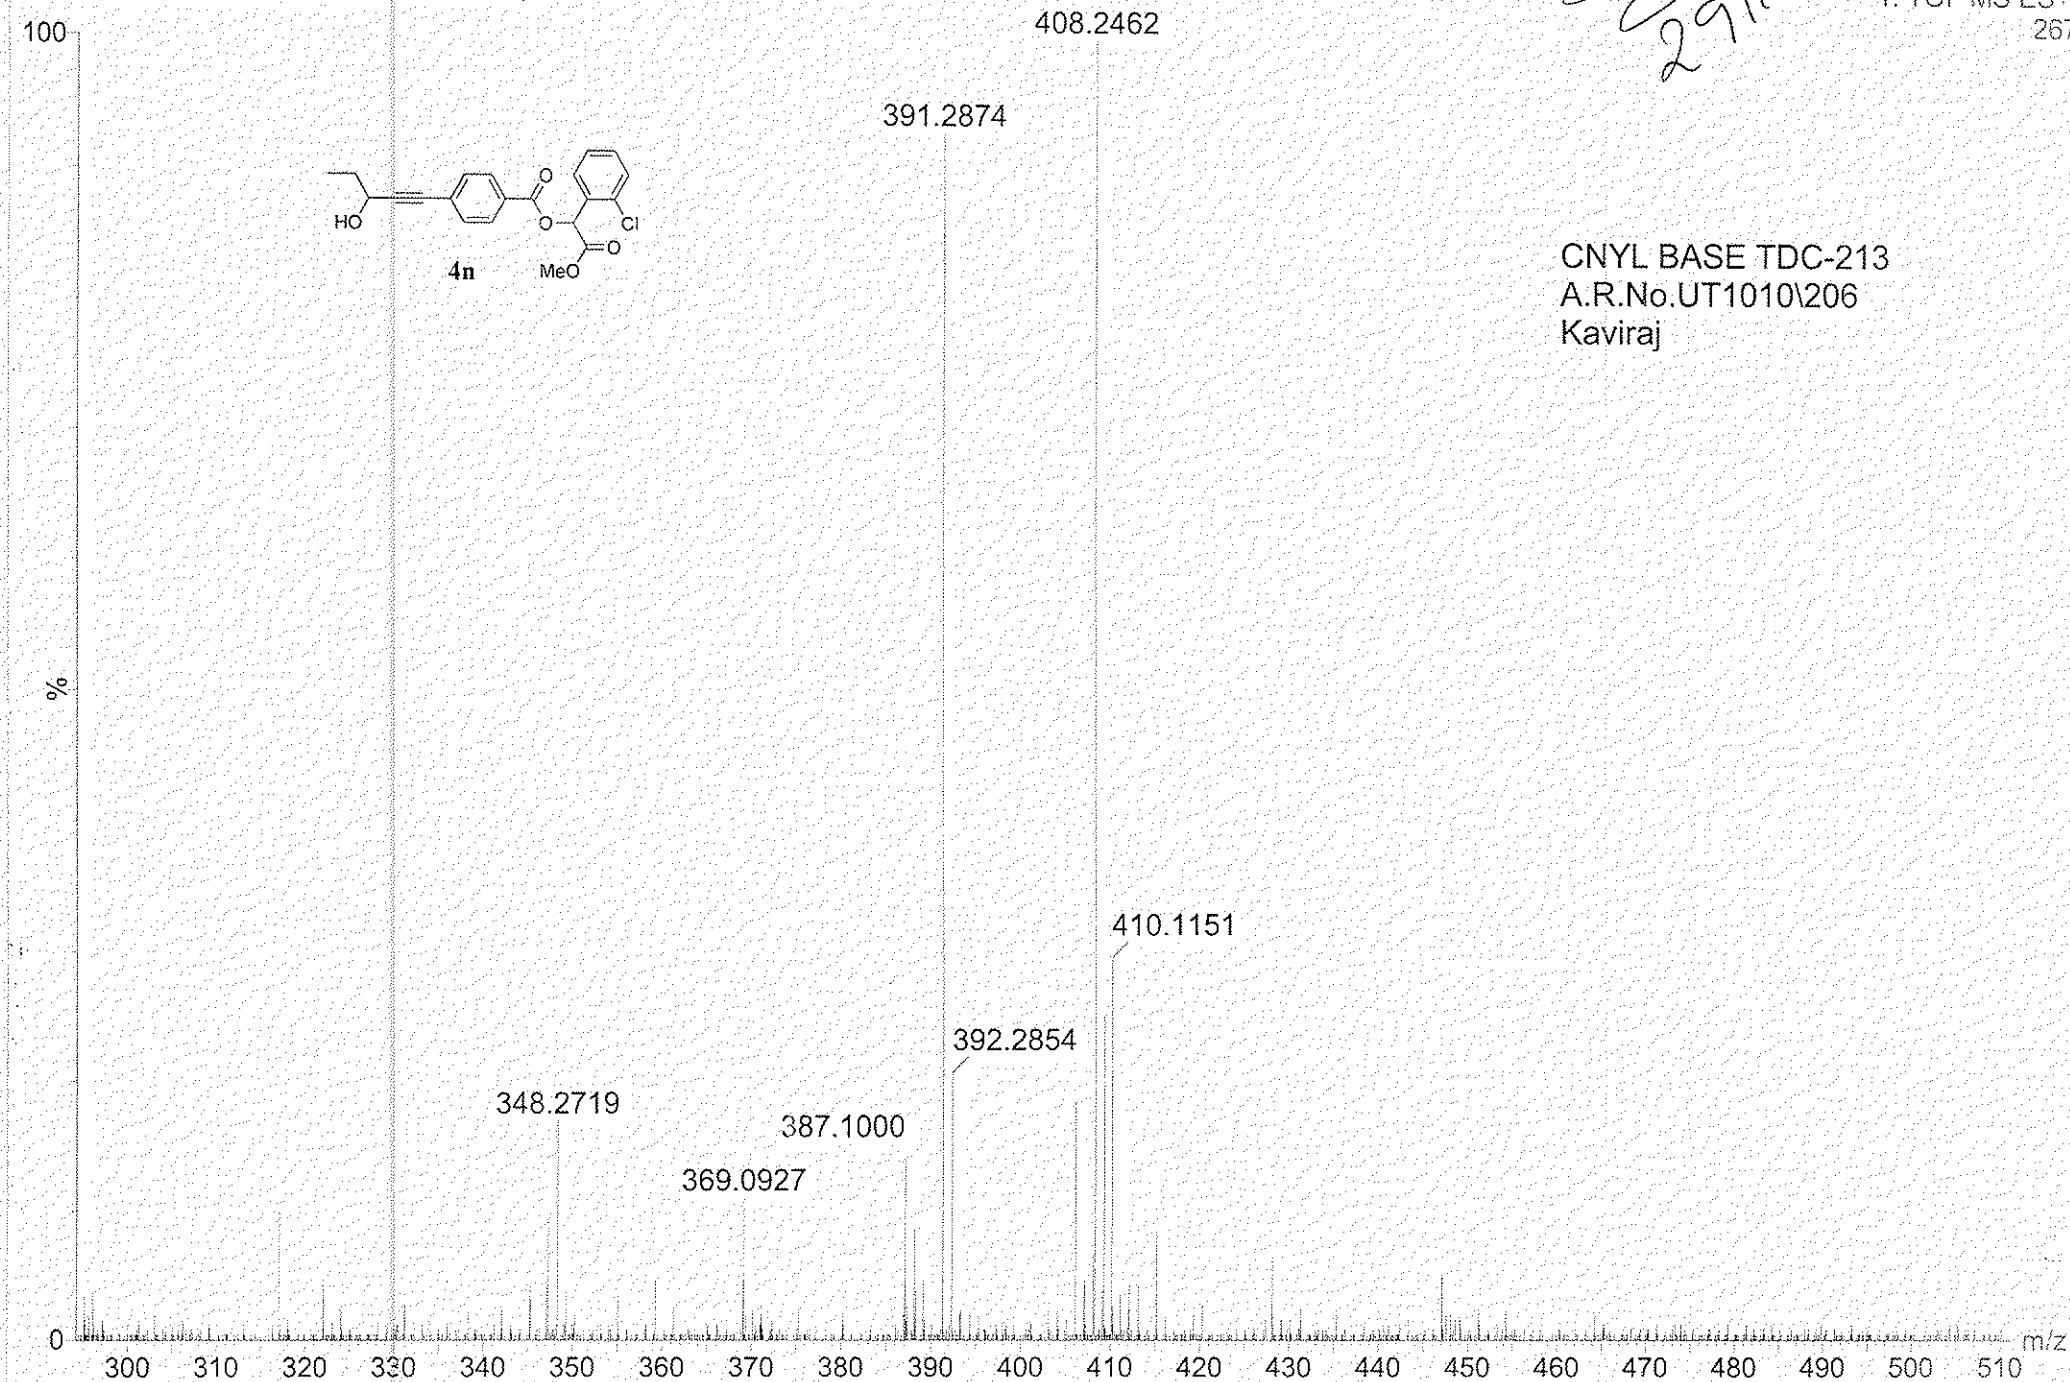

CNYL BASE TDC-213  
A.R.No.UT1010\206  
Kaviraj

## Single Mass Analysis

Tolerance = 5.0 PPM / DBE: min = -1.0, max = 80.0

Element prediction: Off

Number of isotope peaks used for i-FIT = 3

Monoisotopic Mass, Even Electron Ions

258 formula(e) evaluated with 2 results within limits (up to 4 closest results for each mass)

Elements Used:

C: 0-45 H: 0-70 N: 0-3 O: 0-6 Cl: 0-1

BASE

UT1010\_206 22 (0.413) Cm (21:26-86:95)

1: TOF MS ES  
2.67e10

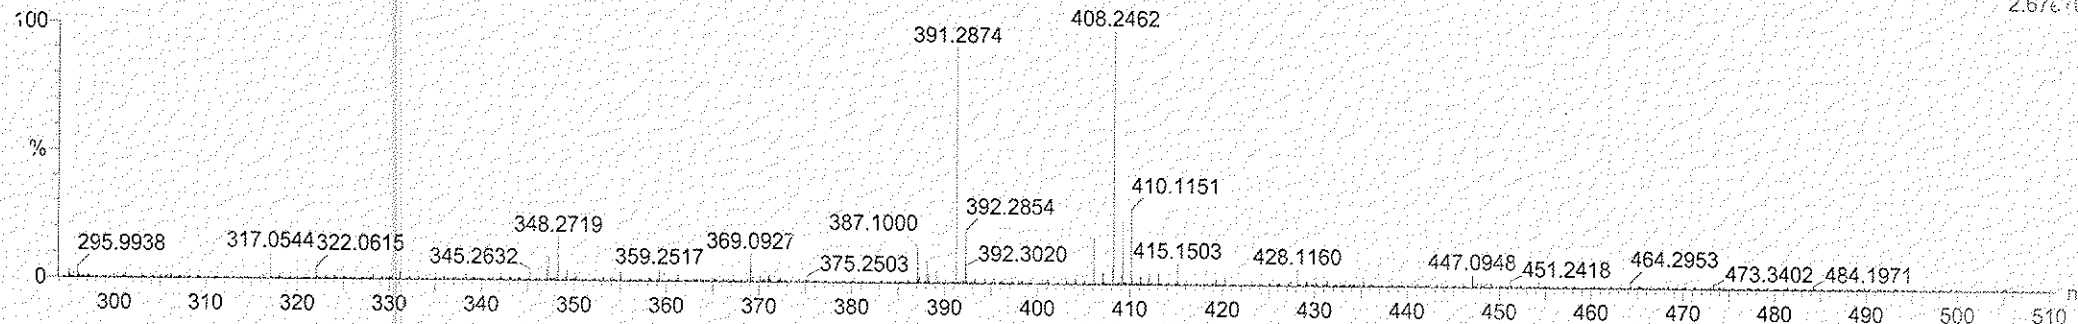

Minimum: -1.0  
Maximum: 5.0 5.0 80.0

| Mass     | Calc. Mass | mDa | PPM | DBE  | i-FIT | Formula       |
|----------|------------|-----|-----|------|-------|---------------|
| 387.1000 | 387.0999   | 0.1 | 0.3 | 11.5 | 4.2   | C21 H20 O5 Cl |
|          | 387.0981   | 1.9 | 4.9 | 16.5 | 8.0   | C22 H15 N2 O5 |

TDC-213 BASTW in DMSO

NMR-400MHz.

AR.No:ME1010/2186

Analyst:Shruthi

Date: 26 th Oct2010

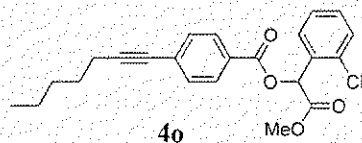

40

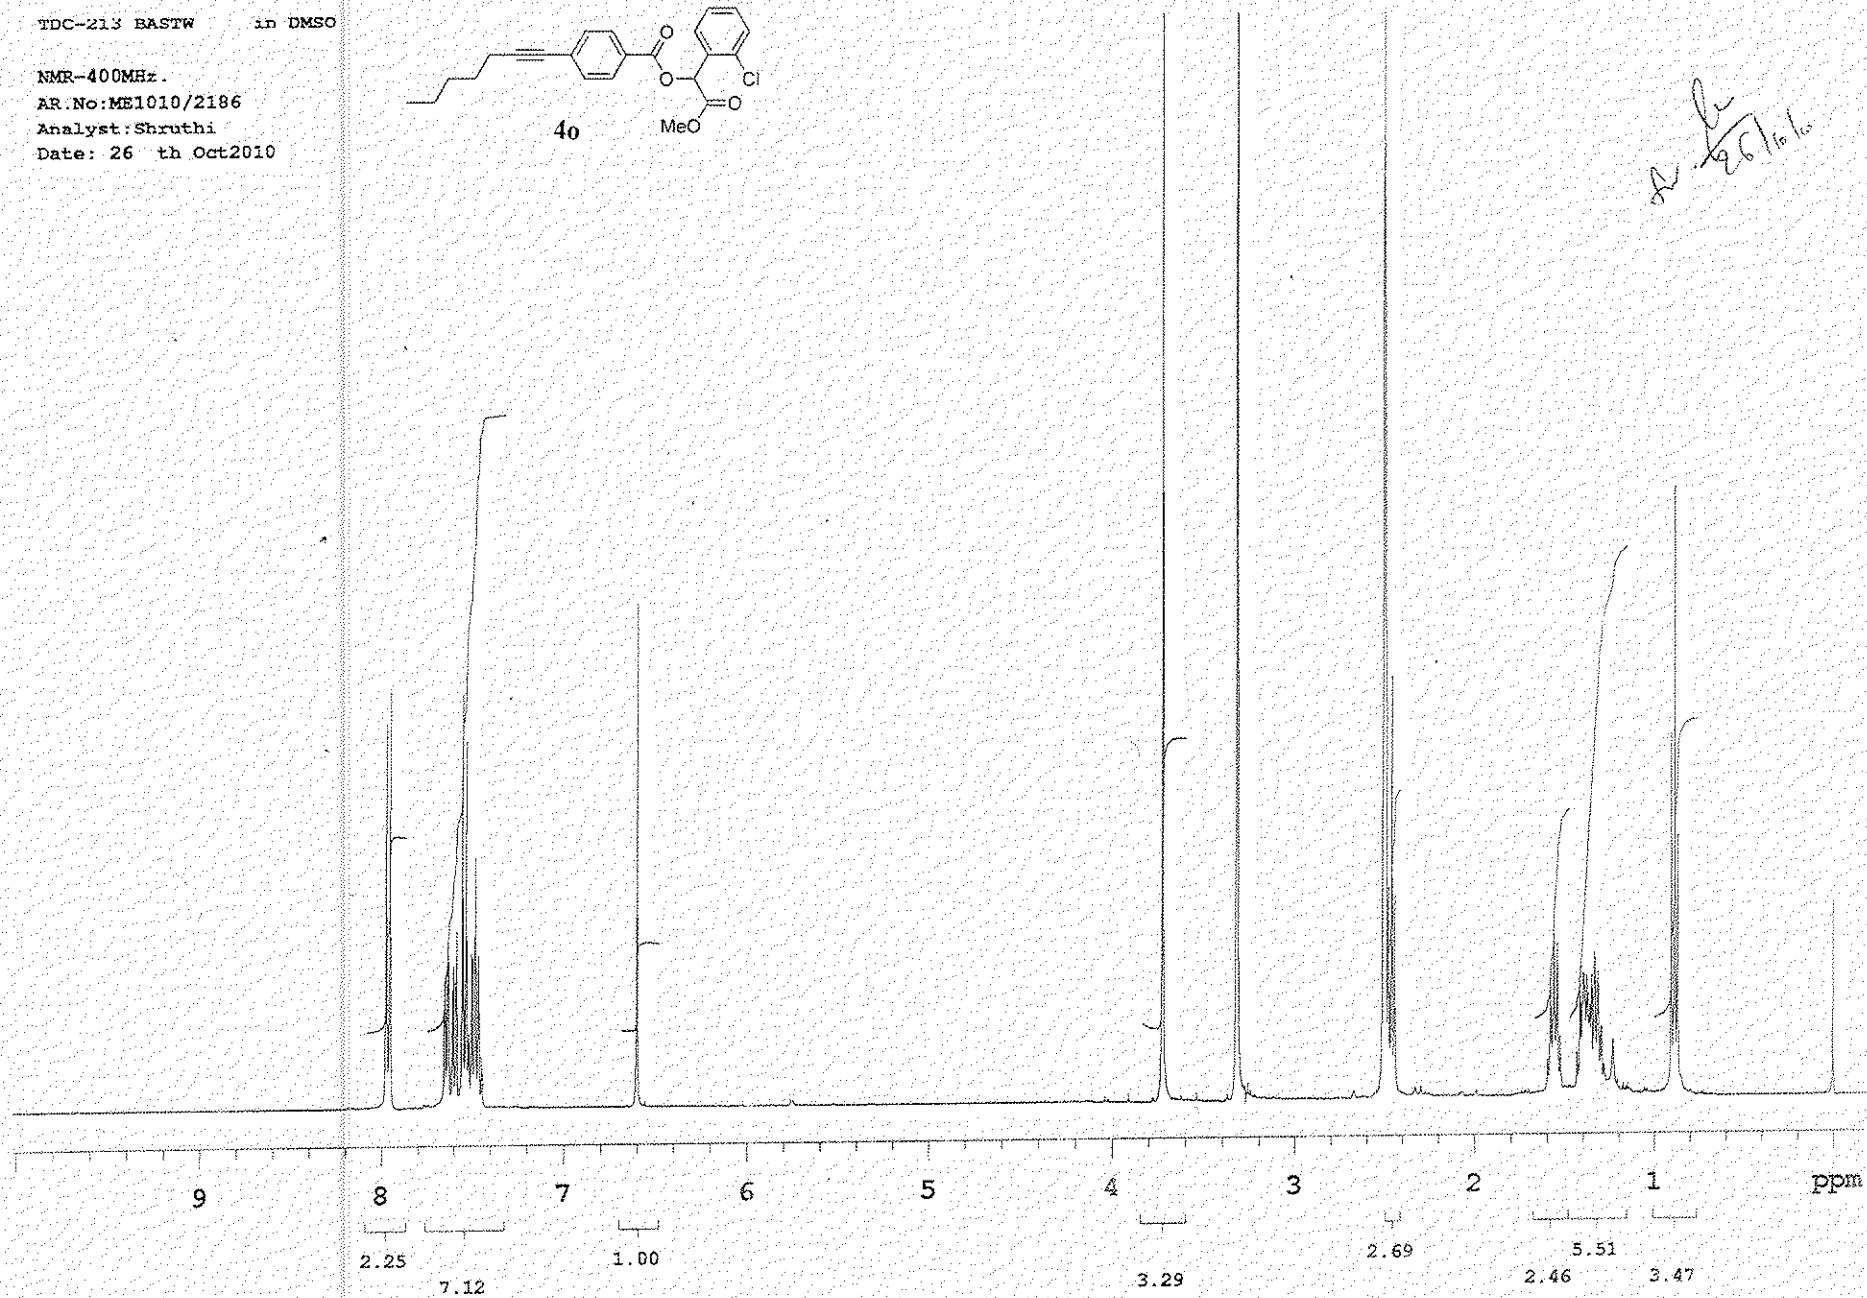



BASTW in DMSO  
TDC-213  
AR NO:GE1010/72  
Analyst:Shruthi  
Date: 29th Oct 2010

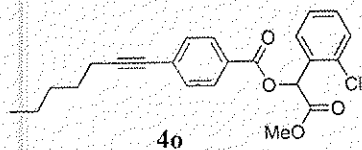

AR&D, Aurigone Discovery Technologies Ltd, Hyderabad  
Instrument Gemini 2000 (Varian 200MHz)  
Date & Time Fri Oct 29 11:56:28 AM 2010  
Recorded By Haribabu.R

*Handwritten signature*  
29/10/10

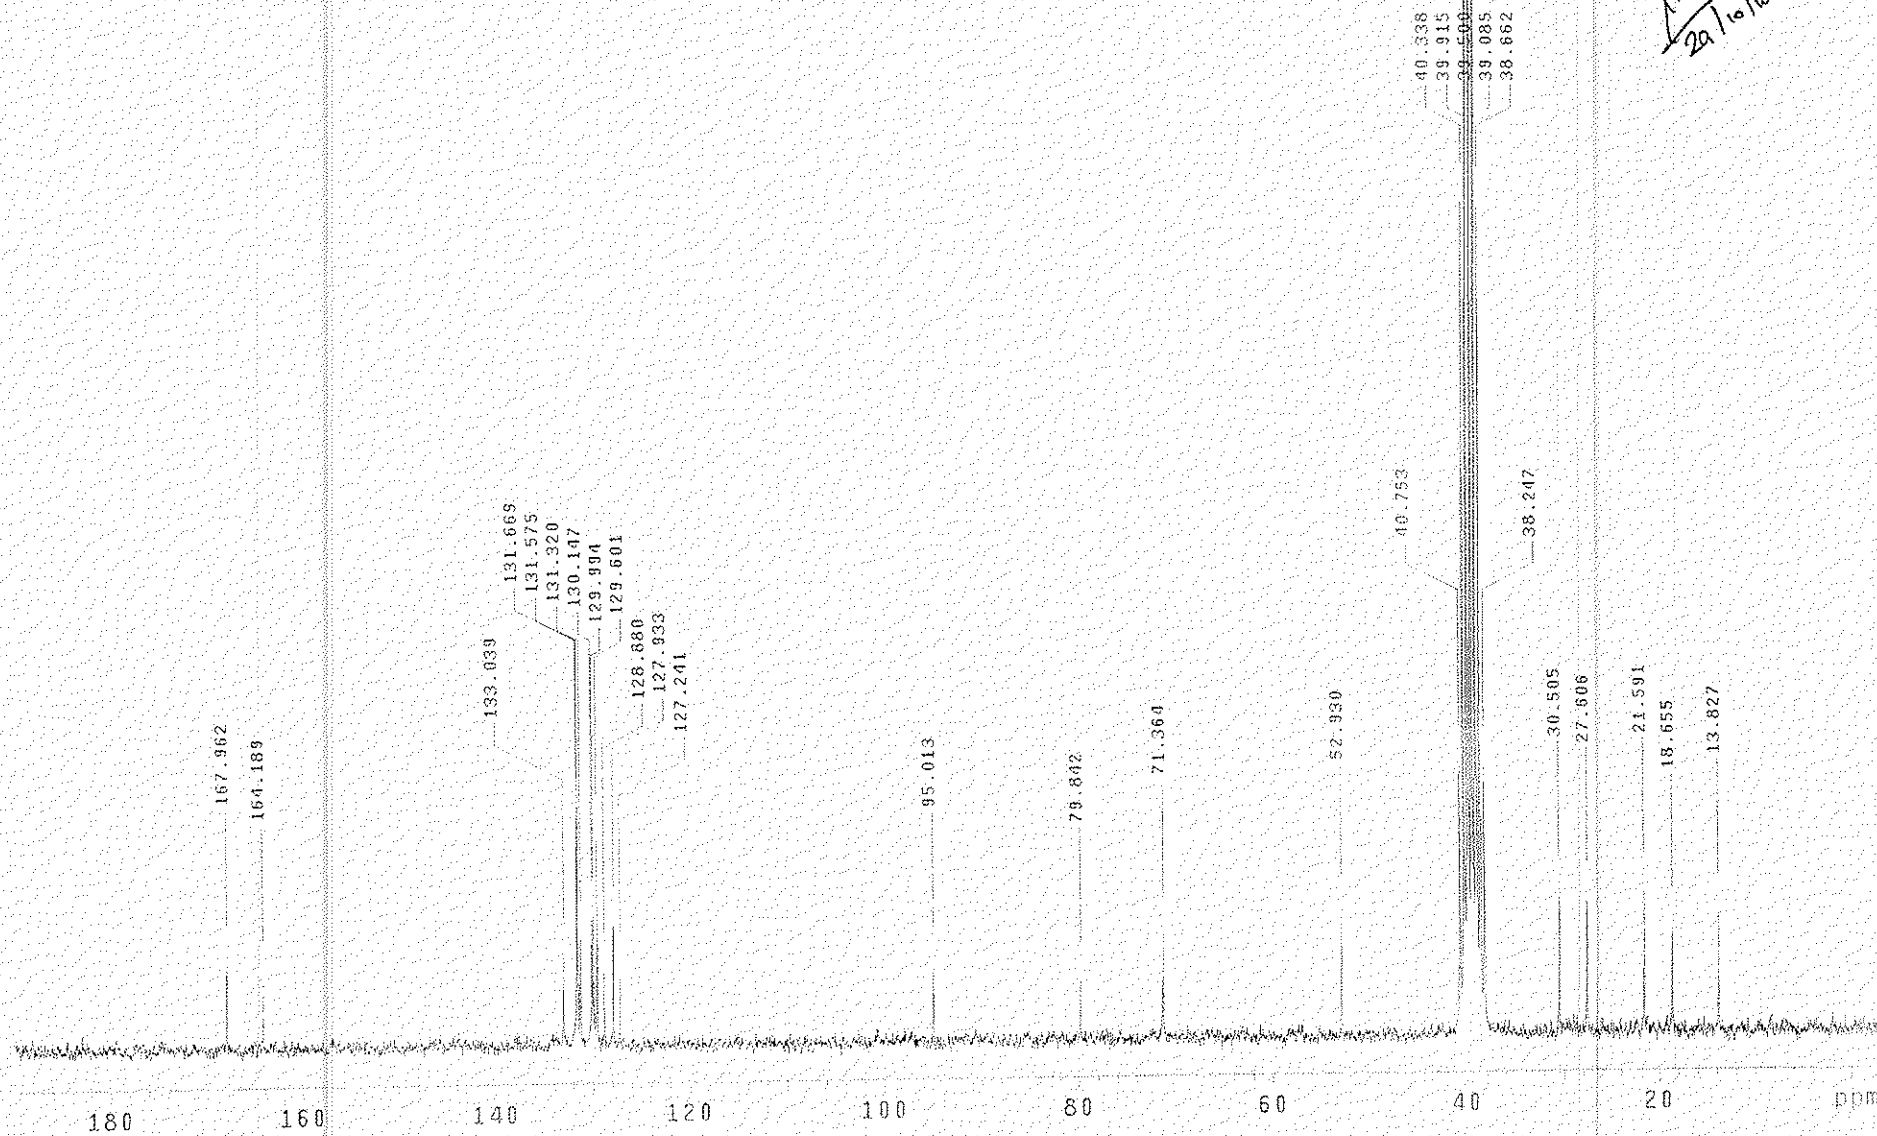

✓  
9/6/11/10

**BASTW**

UT1110\_86 23 (0.426) Cm (23:33-79:88)

1: TOF MS ES+  
3.05e3

CNYL BASTW TDC-213  
A.R.No.UT1110\86  
Kaviraj

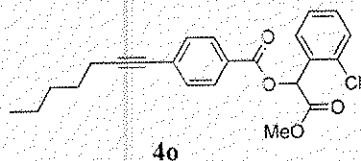

40

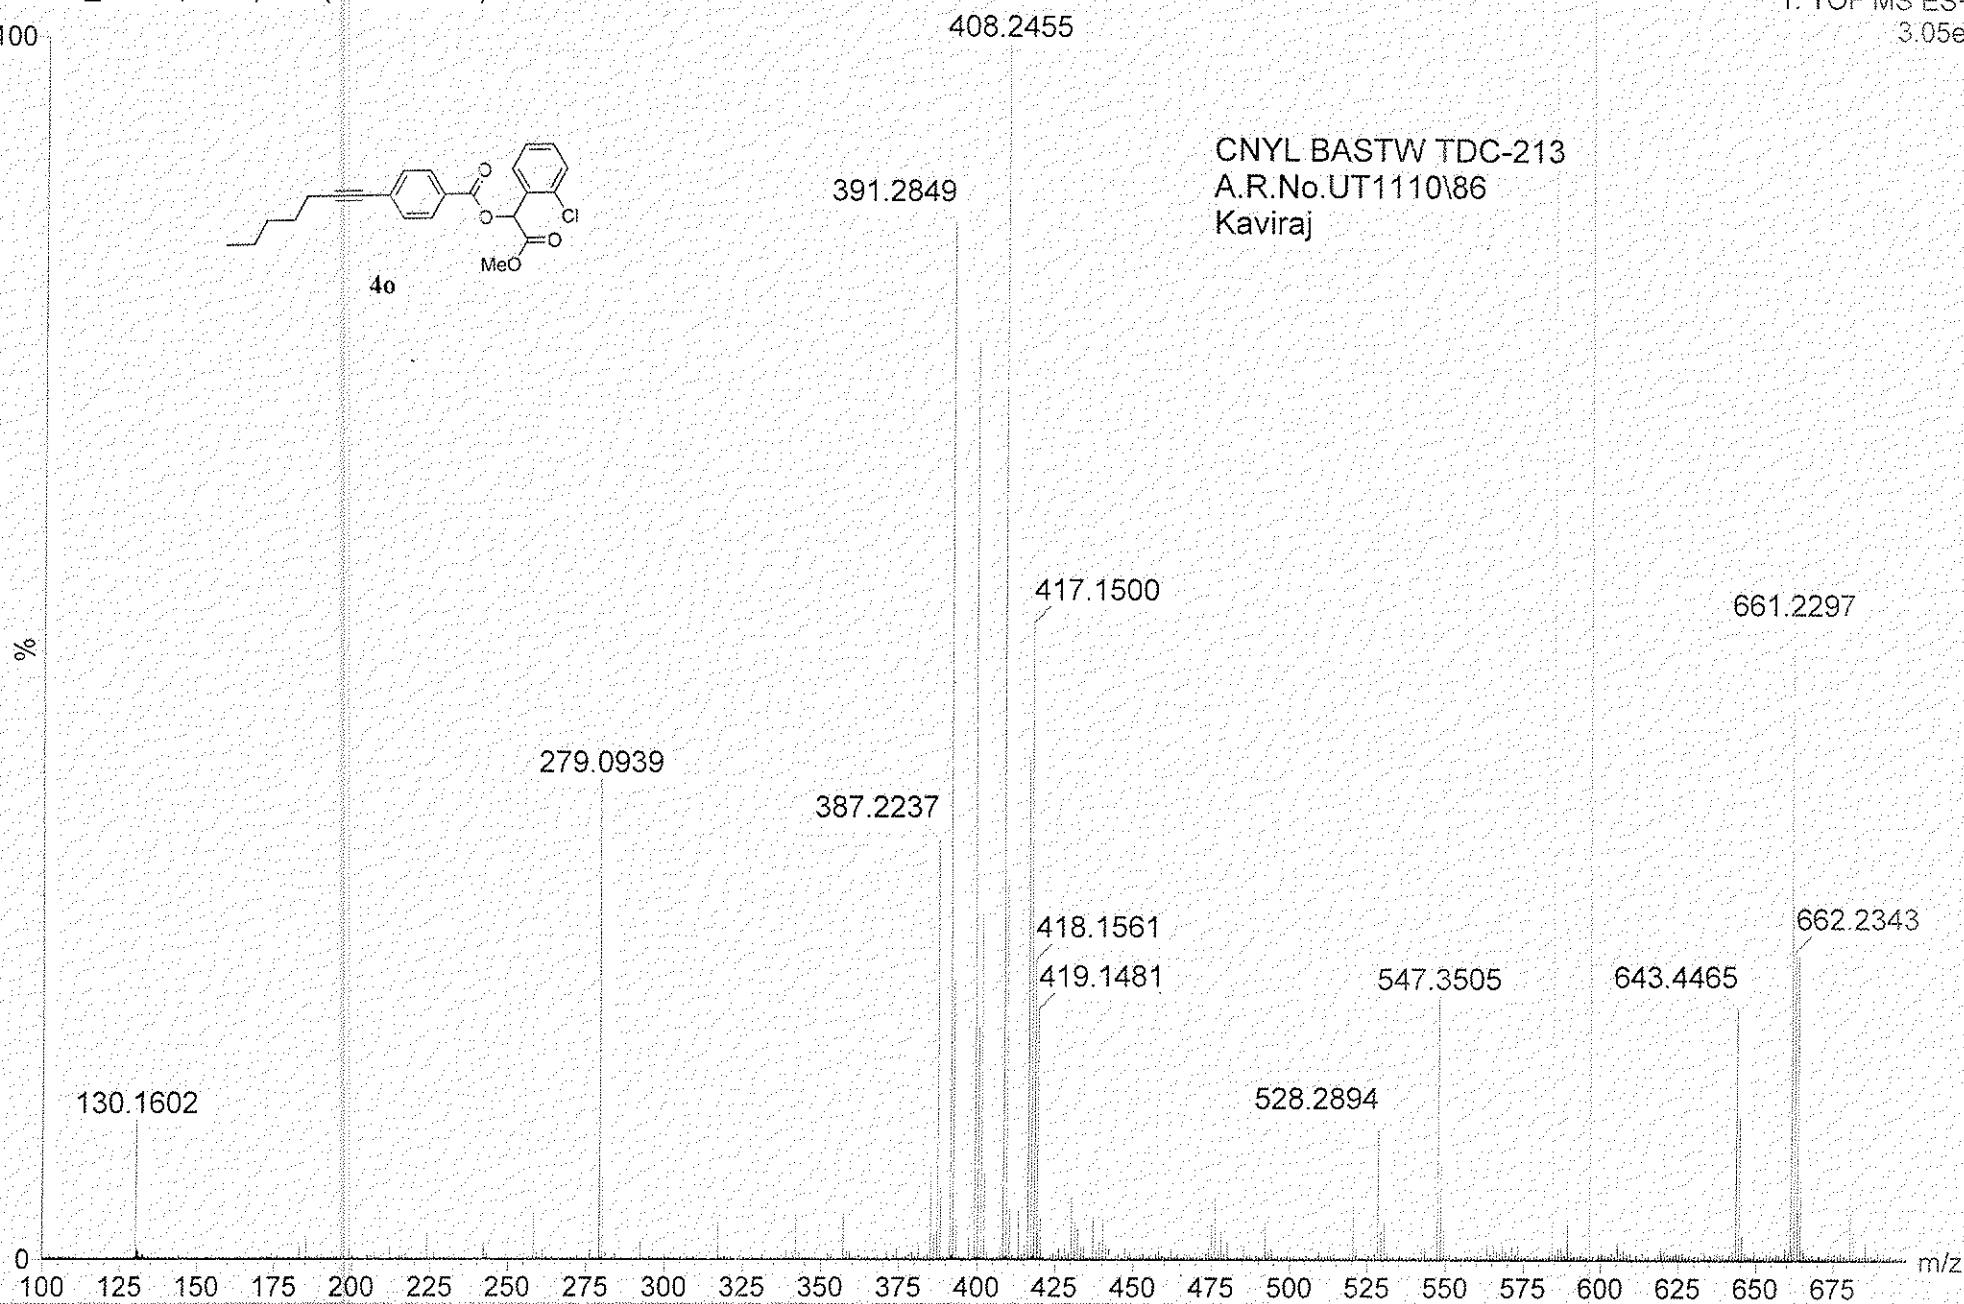

## Elemental Composition Report

### Single Mass Analysis

Tolerance = 5.0 PPM / DBE: min = -1.0, max = 80.0

Element prediction: Off

Number of isotope peaks used for i-FIT = 3

Monoisotopic Mass, Even Electron Ions

61 formula(e) evaluated with 1 results within limits (up to 4 best isotopic matches for each mass)

Elements Used:

C: 0-55 H: 0-65 O: 0-5 Cl: 0-1

BASTW

UT1110\_86 23 (0.426) Cm (23:33-79:88)

1: TOF MS ES+  
3.05e+003

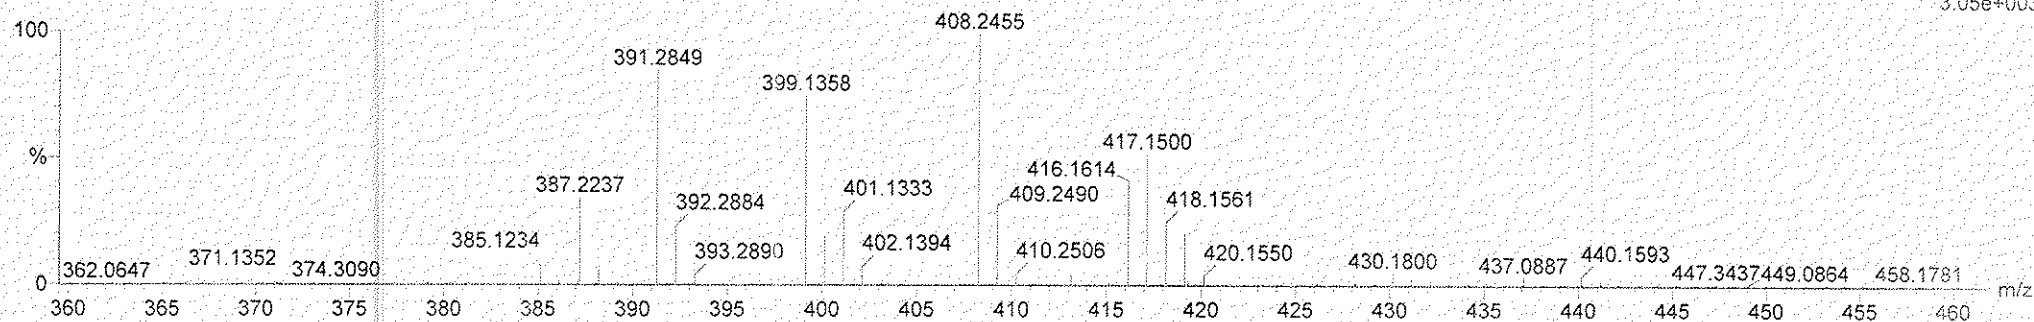

Minimum: -1.0  
Maximum: 5.0 5.0 80.0

| Mass     | Calc. Mass | mDa  | PPM  | DBE  | i-FIT | Formula       |
|----------|------------|------|------|------|-------|---------------|
| 399.1358 | 399.1363   | -0.5 | -1.3 | 11.5 | 1.4   | C23 H24 O4 Cl |

TDC-213 BASTH in DMSO

NMR-400

AR.No:ME1010/2519

Analyst:Haribabu.R

Date: 29 th Oct 2010

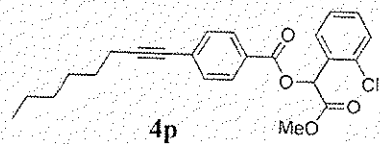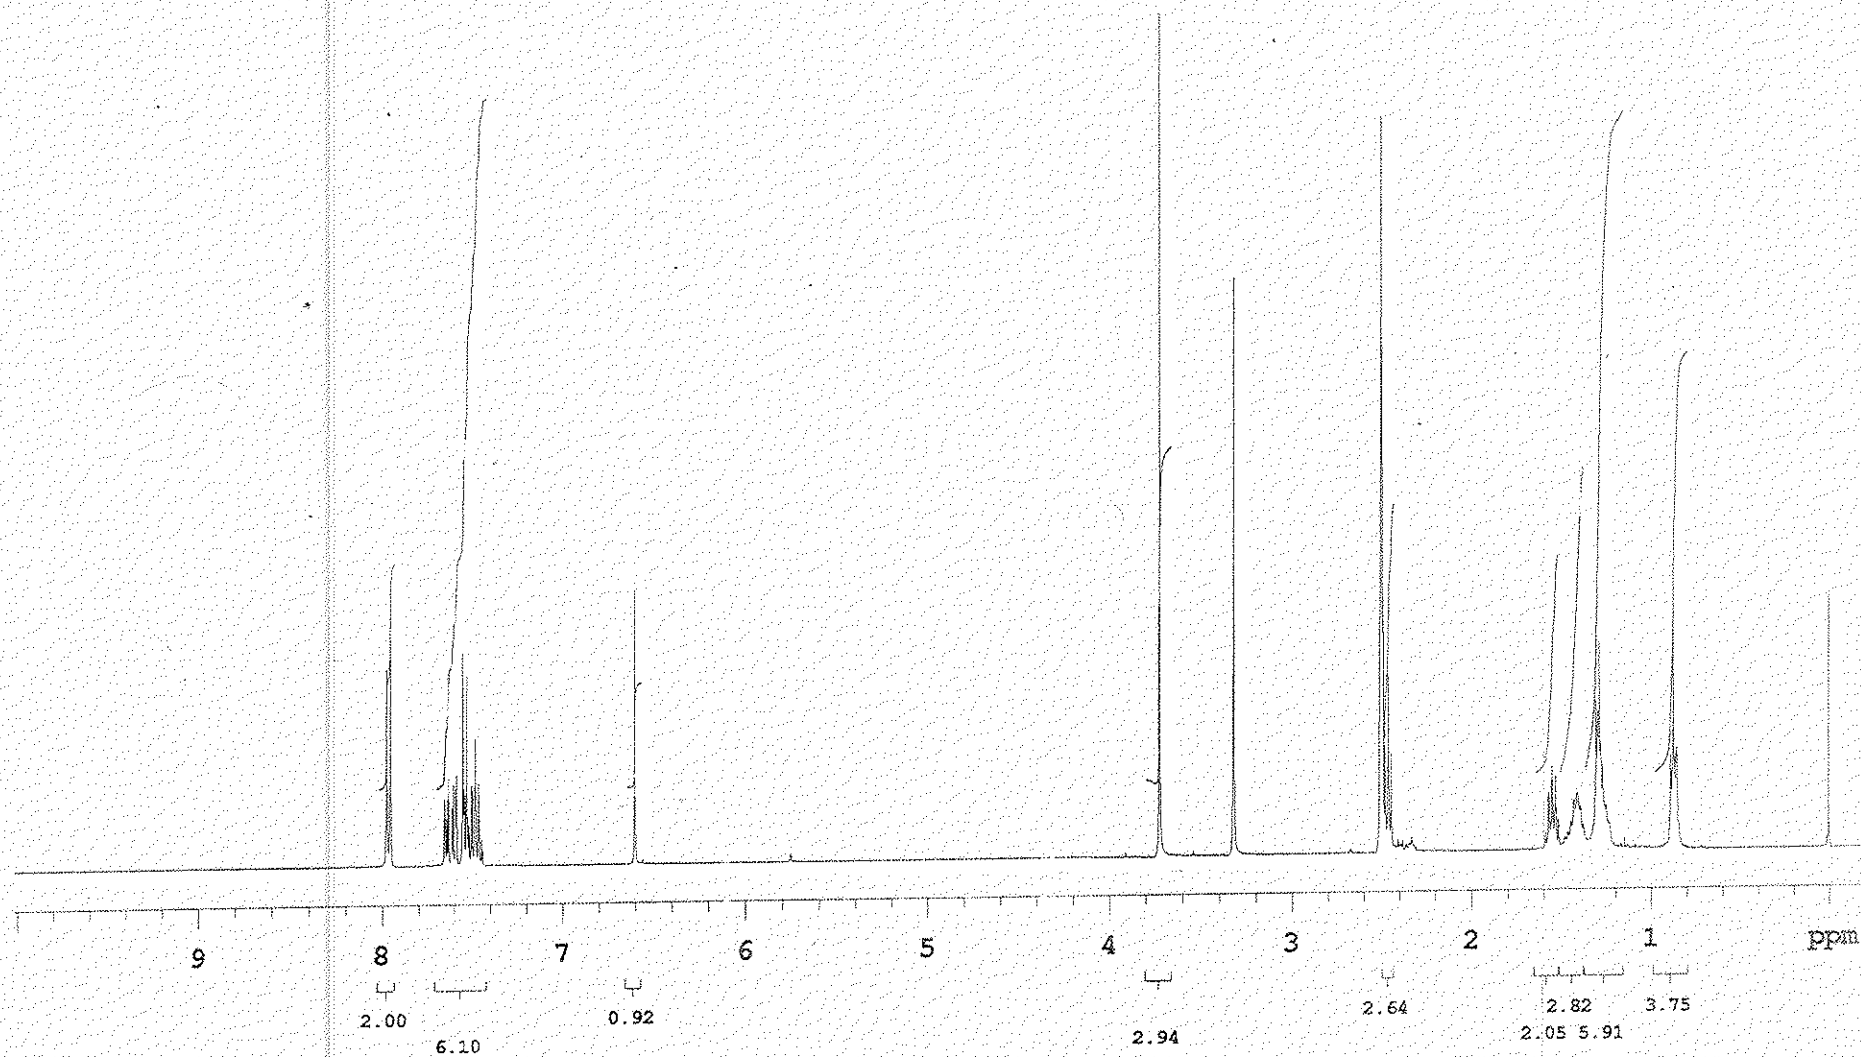

hw  
29/10



TDC-213 BAST4 in DMSO

NMR-400

AR.No:ME1110/773

Analyst:Haribabu.R

Date: 12 th Nov 2010

Sample Name:

773-TDC-213\_BAST4

Data Collected on:

mercuryj-mercury400

Archive directory:

/home/sms50/routine/Nov2010/d\_12

Sample directory:

773-TDC-213\_BAST4\_20101113\_01

FidFile: 773-TDC-213\_BAST4\_20101113\_01

Pulse Sequence: CARBON (s2pul)

Solvent: dmsO

Data collected on: Nov 13 2010

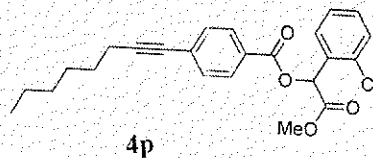

4p

VARIAN

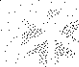

ref11

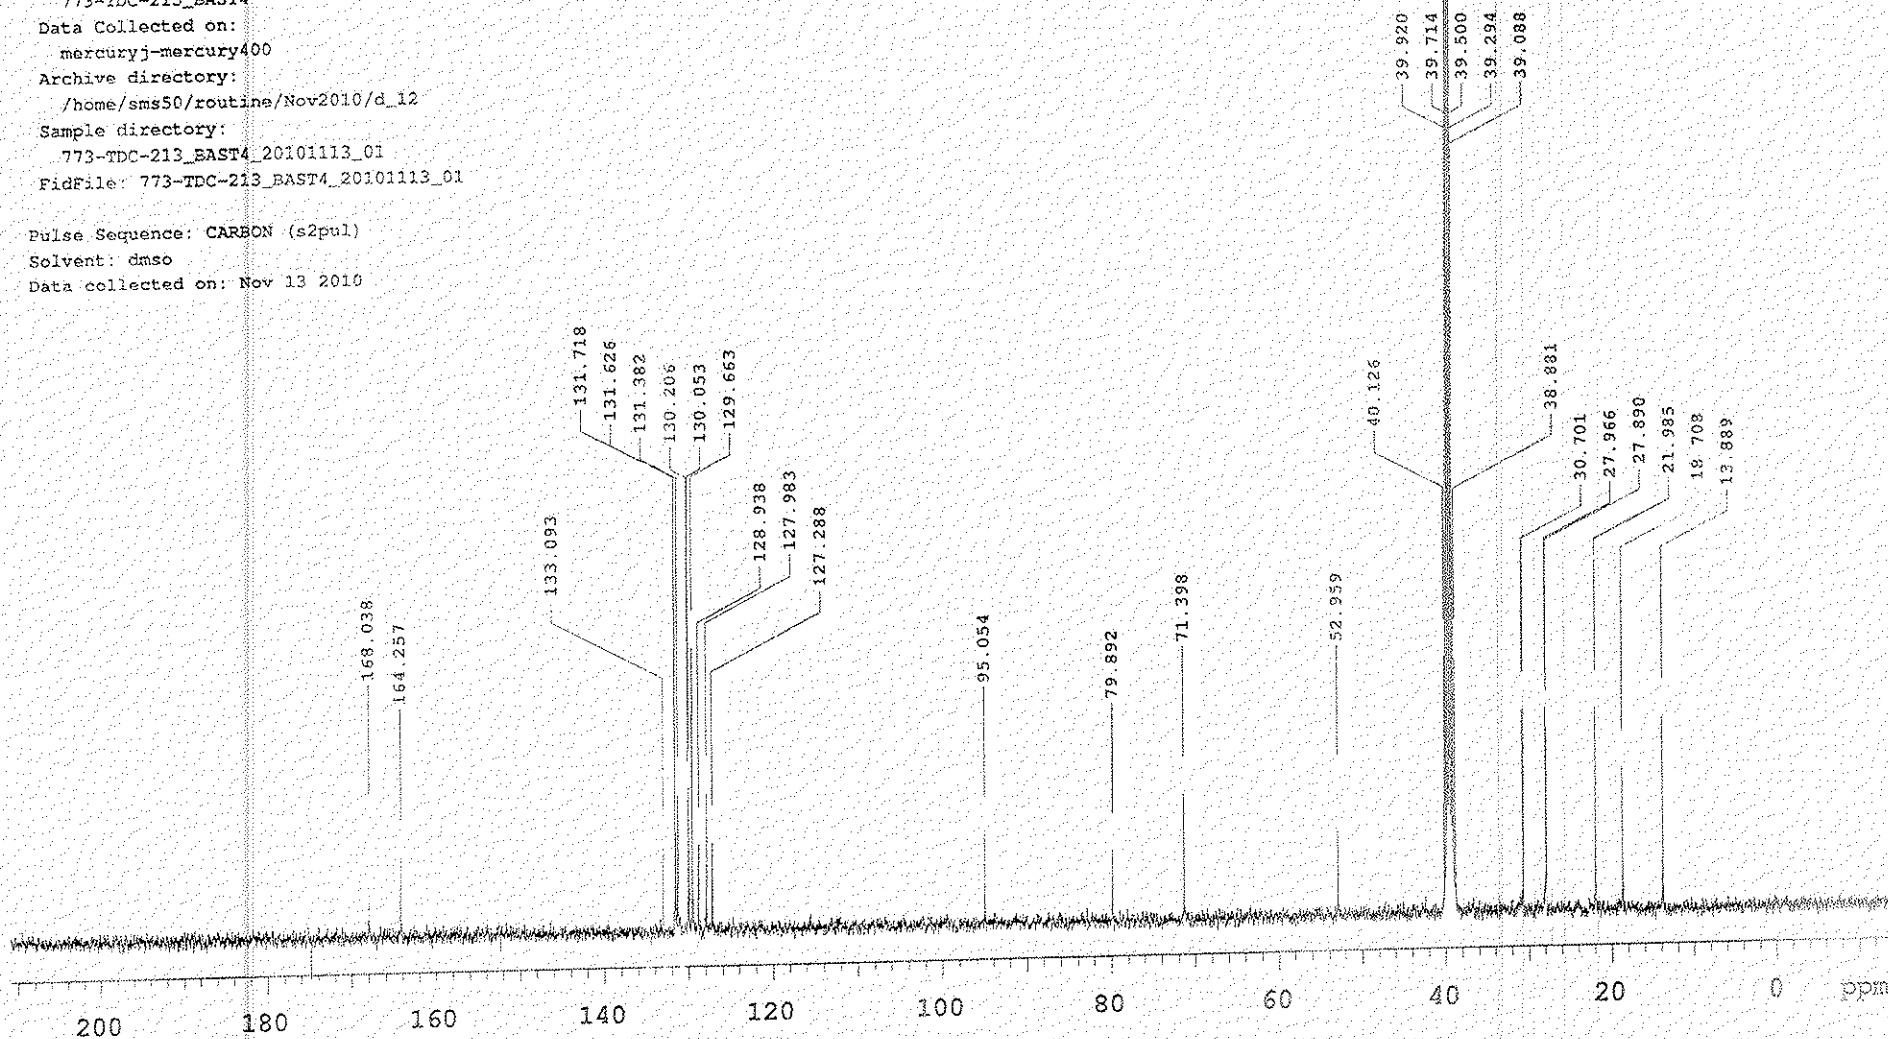

Plotname: 773-TDC-213\_BAST4\_20101113\_01\_plot01

16/11/10

**BASTH**

UT1110\_85 19 (0.353) Cm (19:29-73:81)

1: TOF MS ES+  
4.44e3

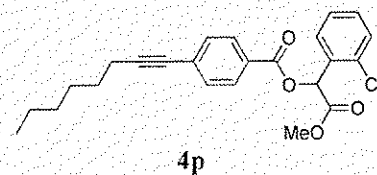

CNYL BASTH TDC-213  
A.R.No.UT1110\85  
Kaviraj

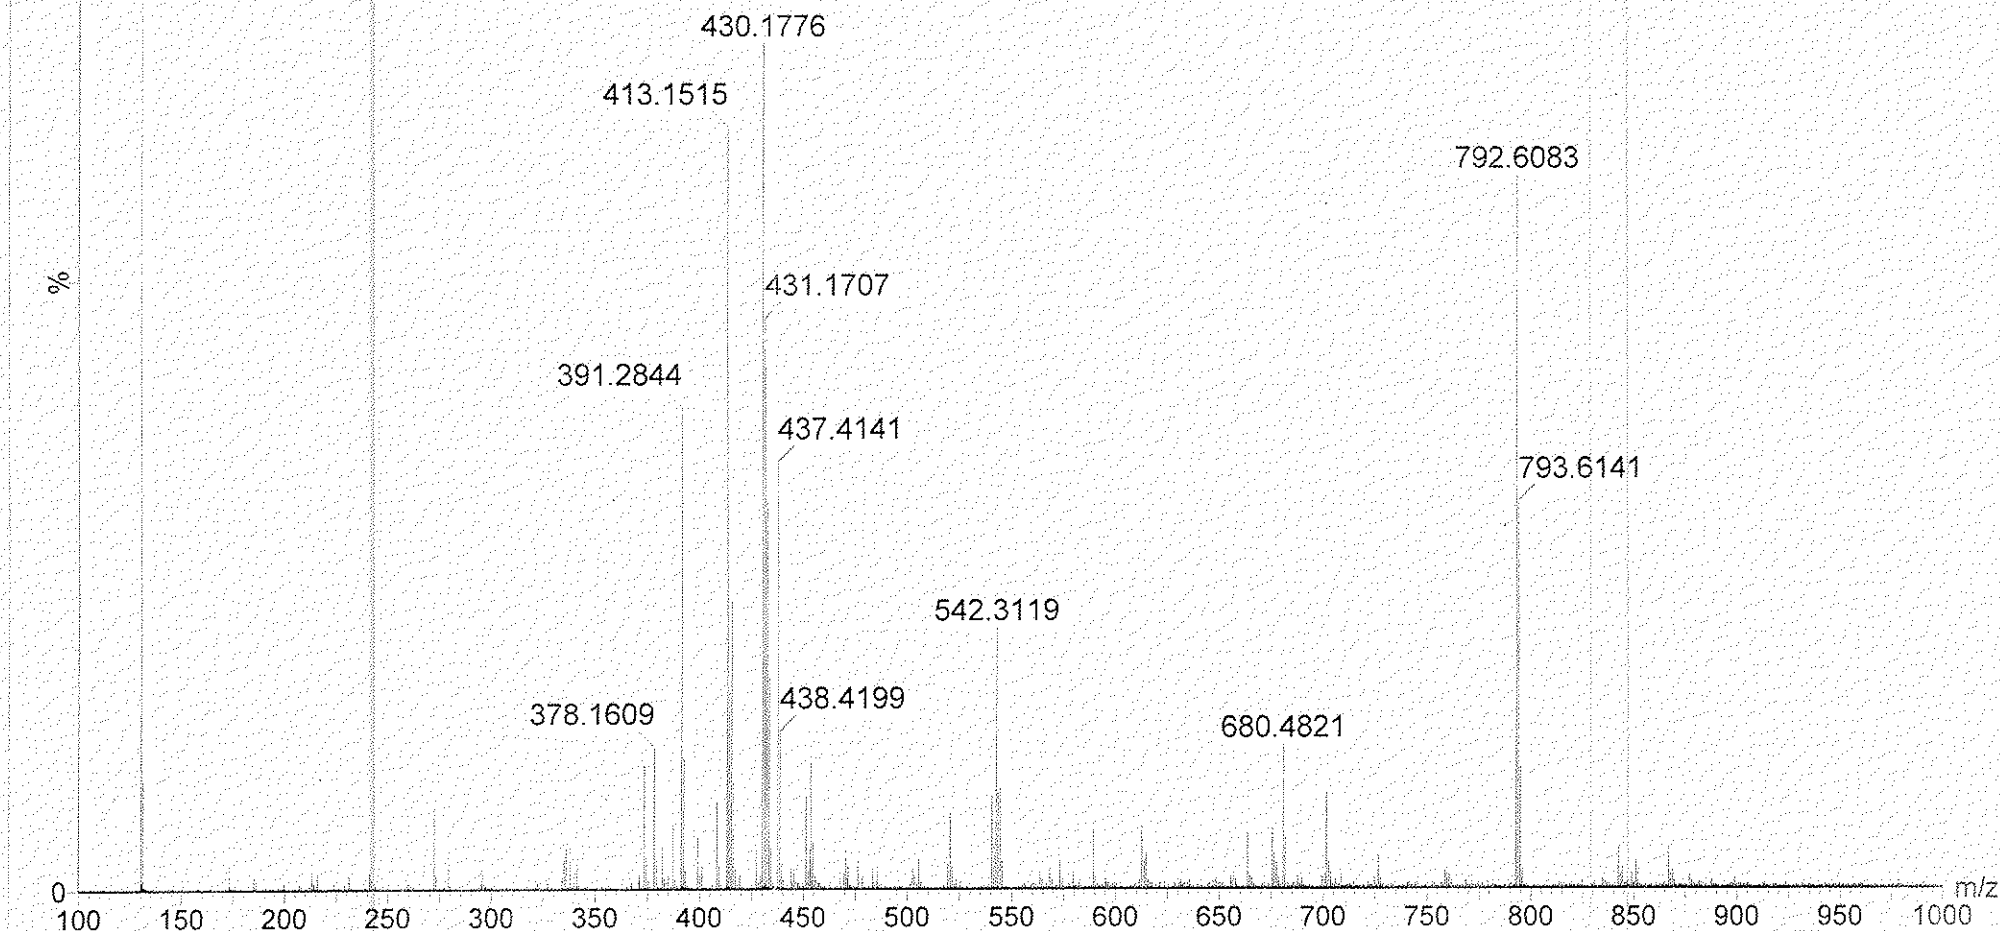

26/11/10

# Elemental Composition Report

## Single Mass Analysis

Tolerance = 5.0 PPM / DBE: min = -1.0, max = 80.0

Element prediction: Off

Number of isotope peaks used for i-FIT = 3

Monoisotopic Mass, Even Electron Ions

61 formula(e) evaluated with 1 results within limits (up to 4 best isotopic matches for each mass)

Elements Used:

C: 0-55 H: 0-65 O: 0-5 Cl: 0-1

BASTH

UT1110\_85 19 (0.353) Cm (19:29-73.81)

1: TOF MS ES+  
3.08e+003

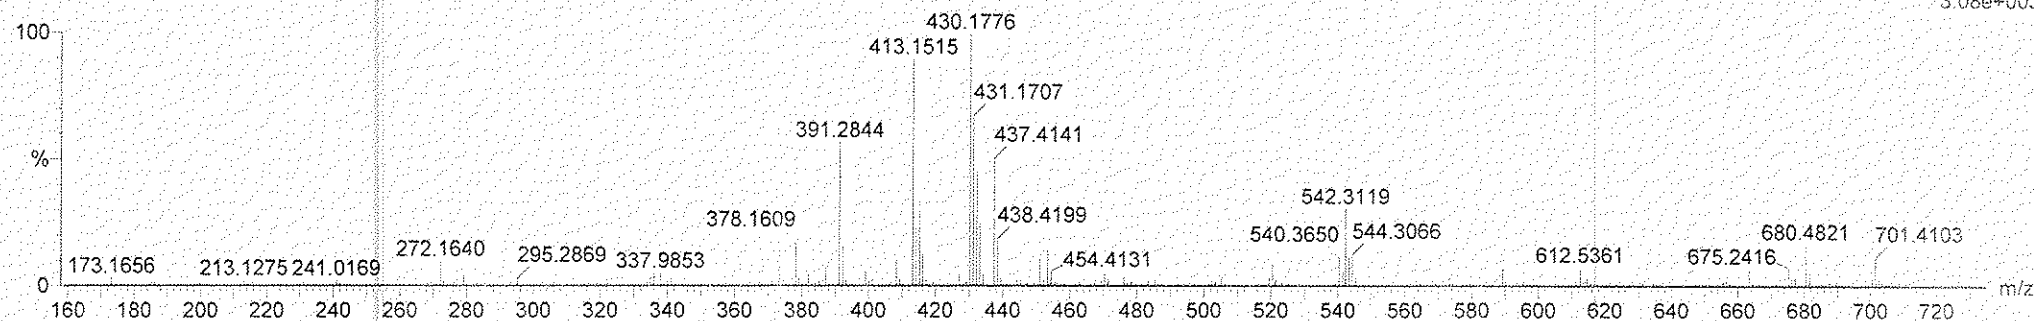

Minimum: -1.0  
Maximum: 5.0 5.0 80.0

| Mass     | Calc. Mass | mDa  | PPM  | DBE  | i-FIT | Formula       |
|----------|------------|------|------|------|-------|---------------|
| 413.1515 | 413.1520   | -0.5 | -1.2 | 11.5 | 2.0   | C24 H26 O4 Cl |

not in

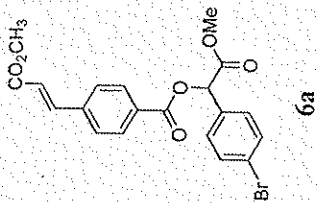

TDC-213 B1MA/MeAC in DMSO  
NMR-000  
AR.No:ME1210/1237  
Analyst:Haribabu.R  
Date: 13 th Dec. 2010

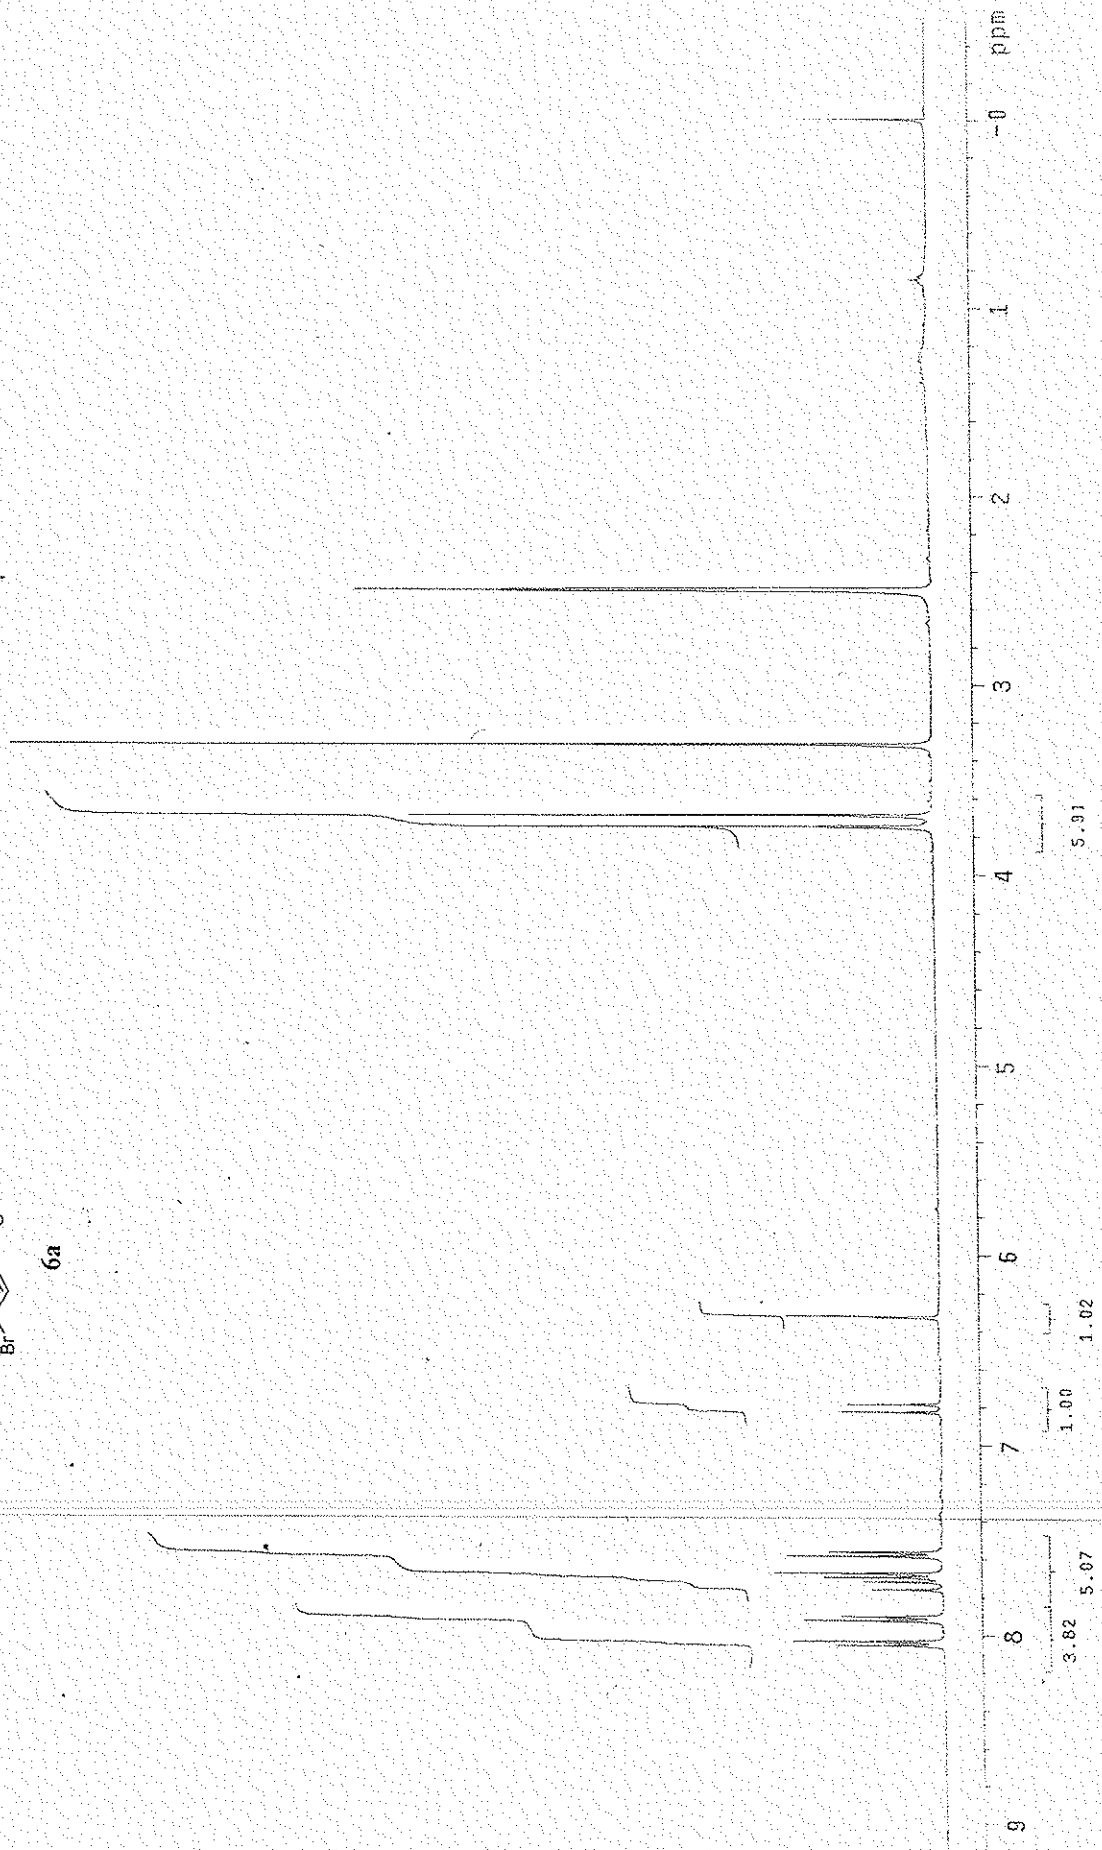



mp 179

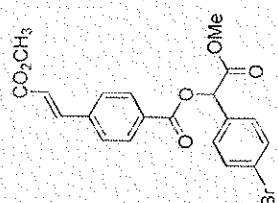

6a

IPC-213 bima-meac in DMSO  
NMR-400  
AR No: M1210/2083  
Analyst: Haribabu.R  
Date: 22 nd Dec. 2010

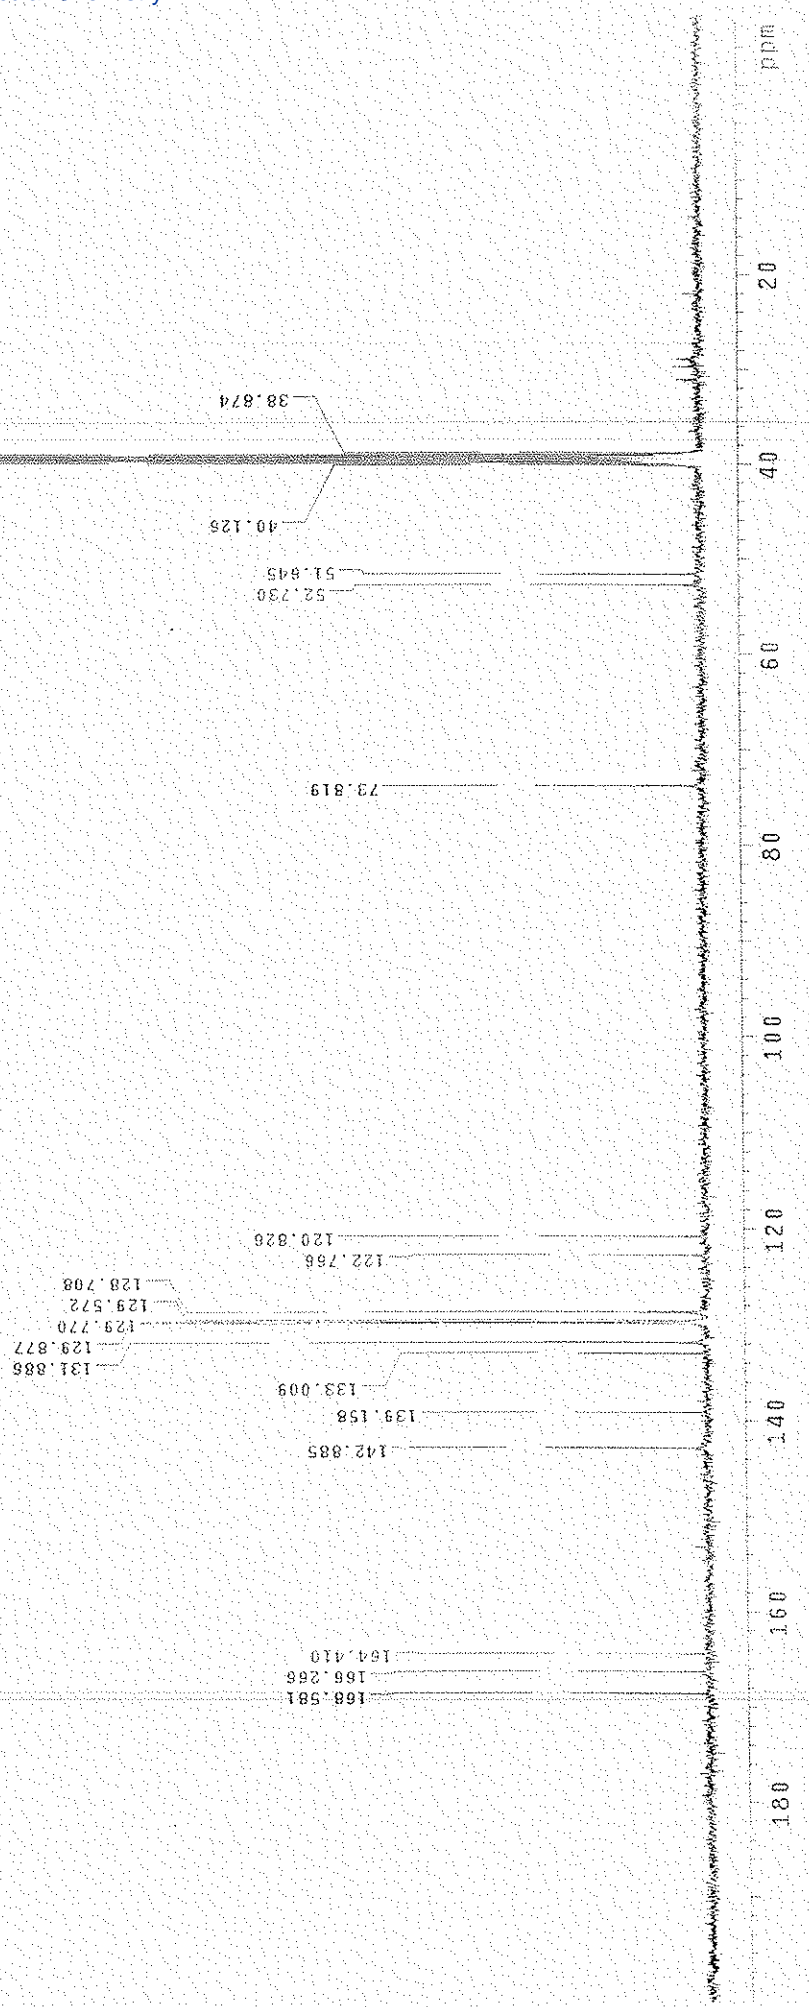

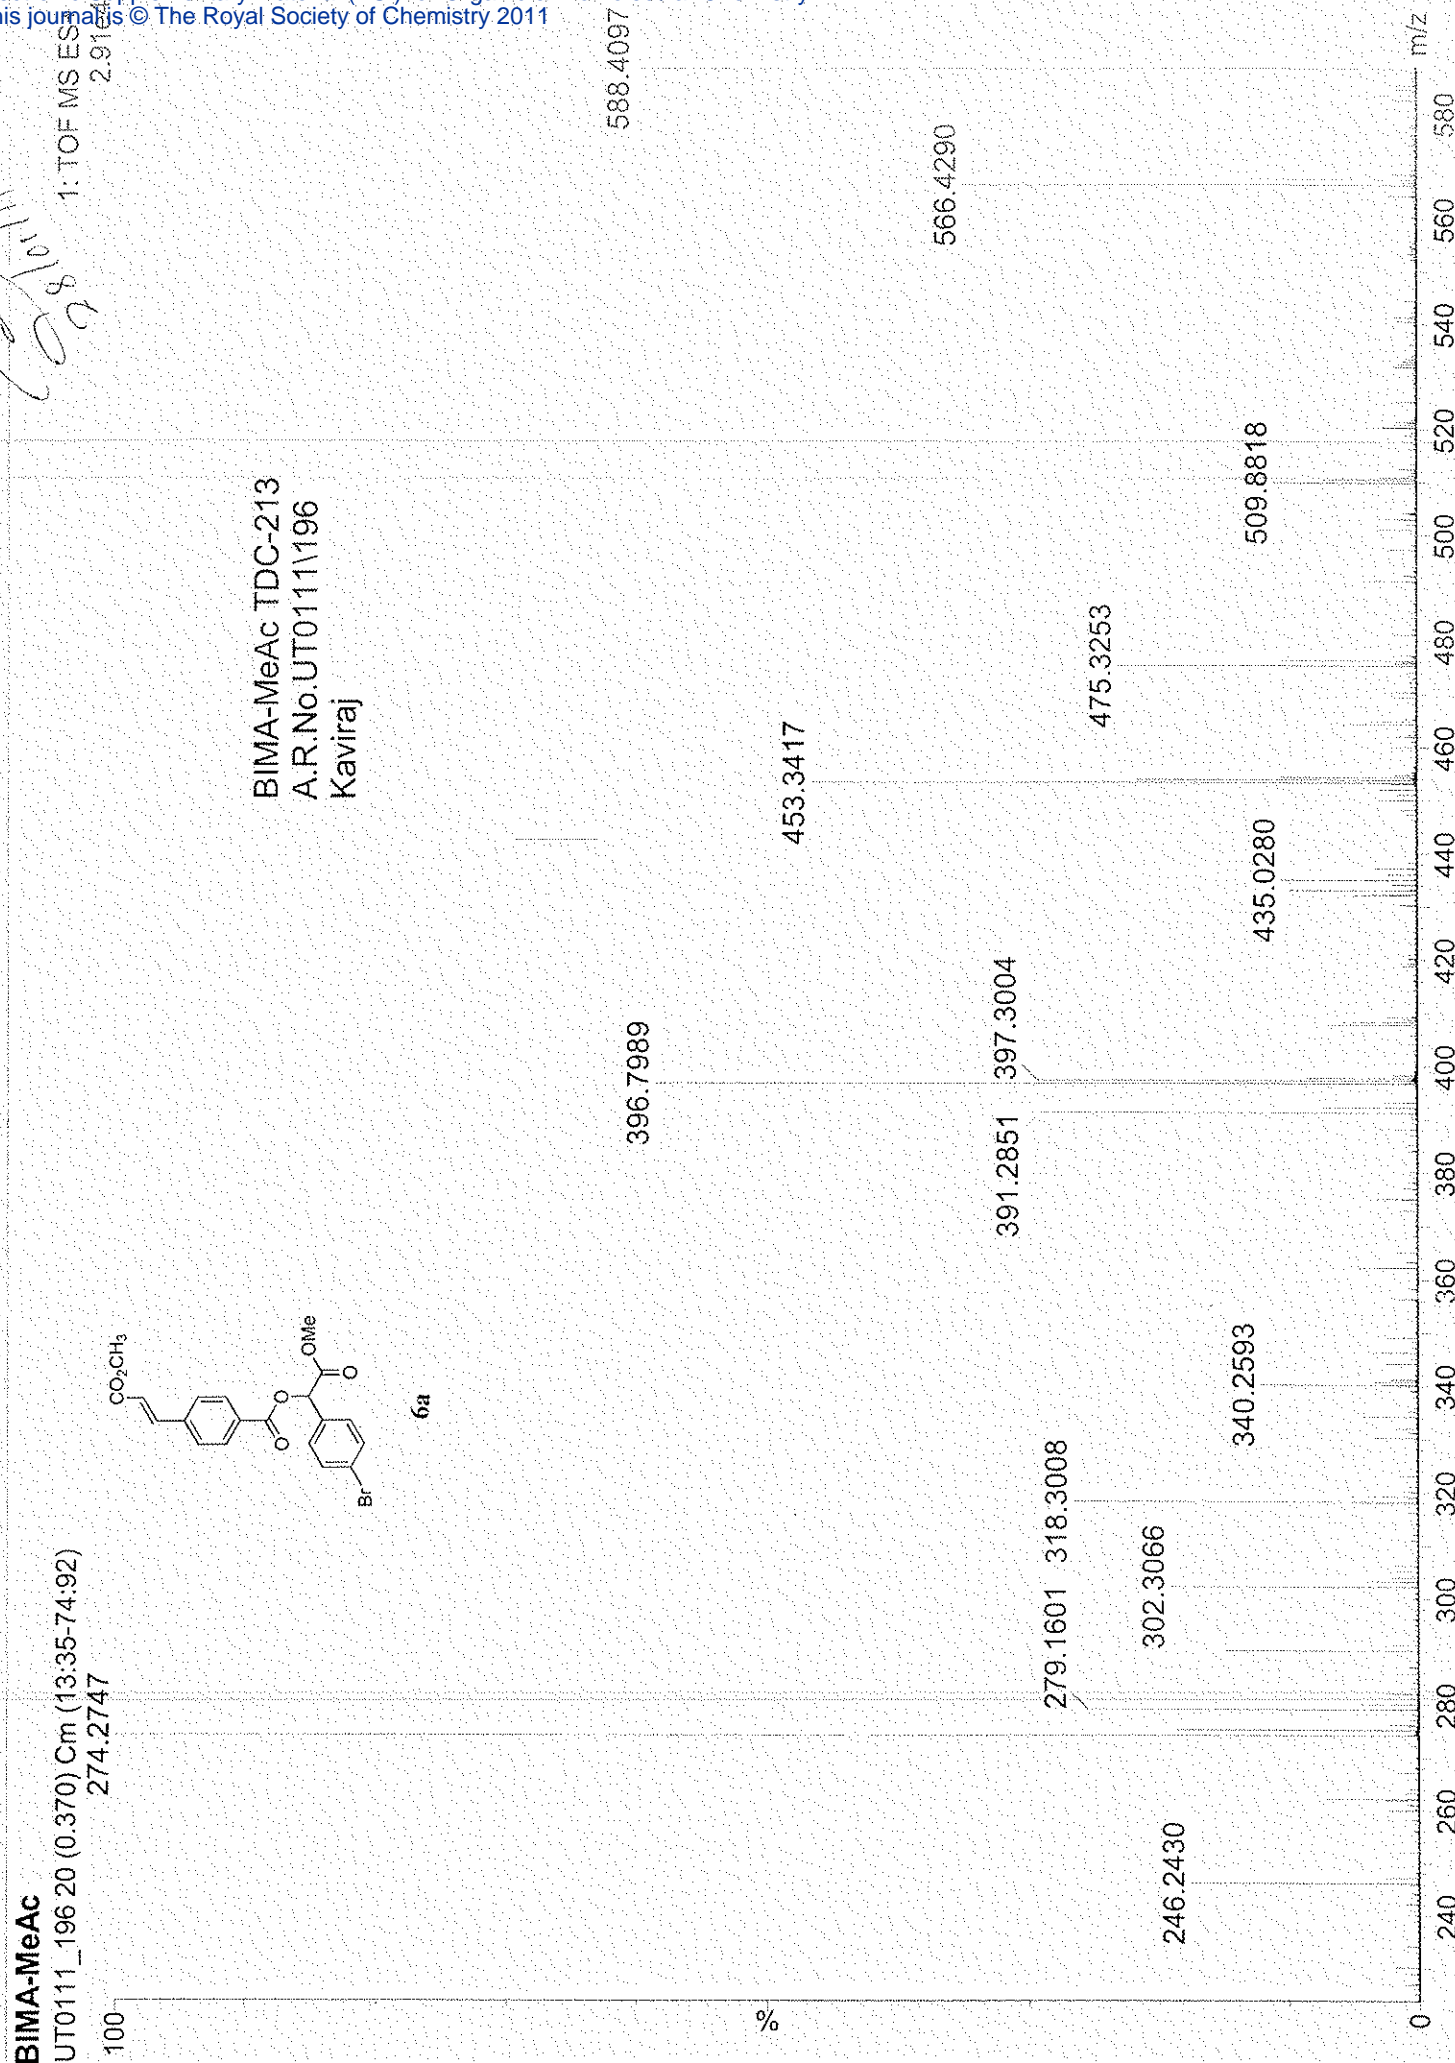

20/10/11  
288

Single Mass Analysis

Tolerance = 5.0 PPM / DBE: min = -1.0, max = 80.0  
Element prediction: Off  
Number of isotope peaks used for i-FIT = 3

Monoisotopic Mass, Even Electron Ions  
47 formula(e) evaluated with 2 results within limits (up to 4 best isotopic matches for each mass)  
Elements Used:  
C: 0-35 H: 0-30 O: 0-8 Br: 0-1

BIMA-MeAc  
UT0111\_196 20 (0.370) Cm (13:35-74.92)

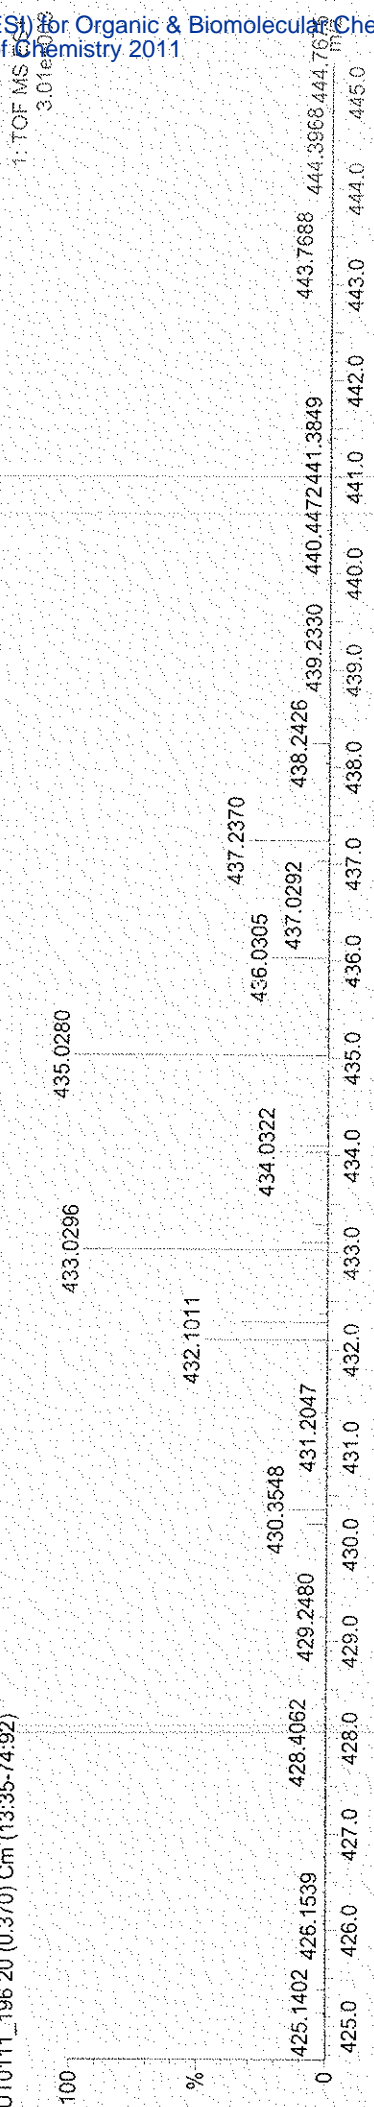

Minimum: -1.0  
Maximum: 80.0

| Mass     | Calc. Mass | mDa | PPM | DBE  | i-FIT  | Formula       |
|----------|------------|-----|-----|------|--------|---------------|
| 433.0296 | 433.0287   | 0.9 | 2.1 | 11.5 | 8.0    | C20 H18 O6 Br |
|          | 433.0290   | 0.6 | 1.4 | 31.5 | 1468.1 | C33 H5 O2     |

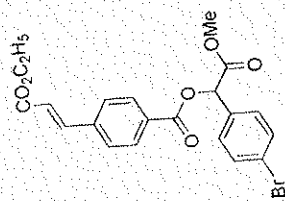

6b

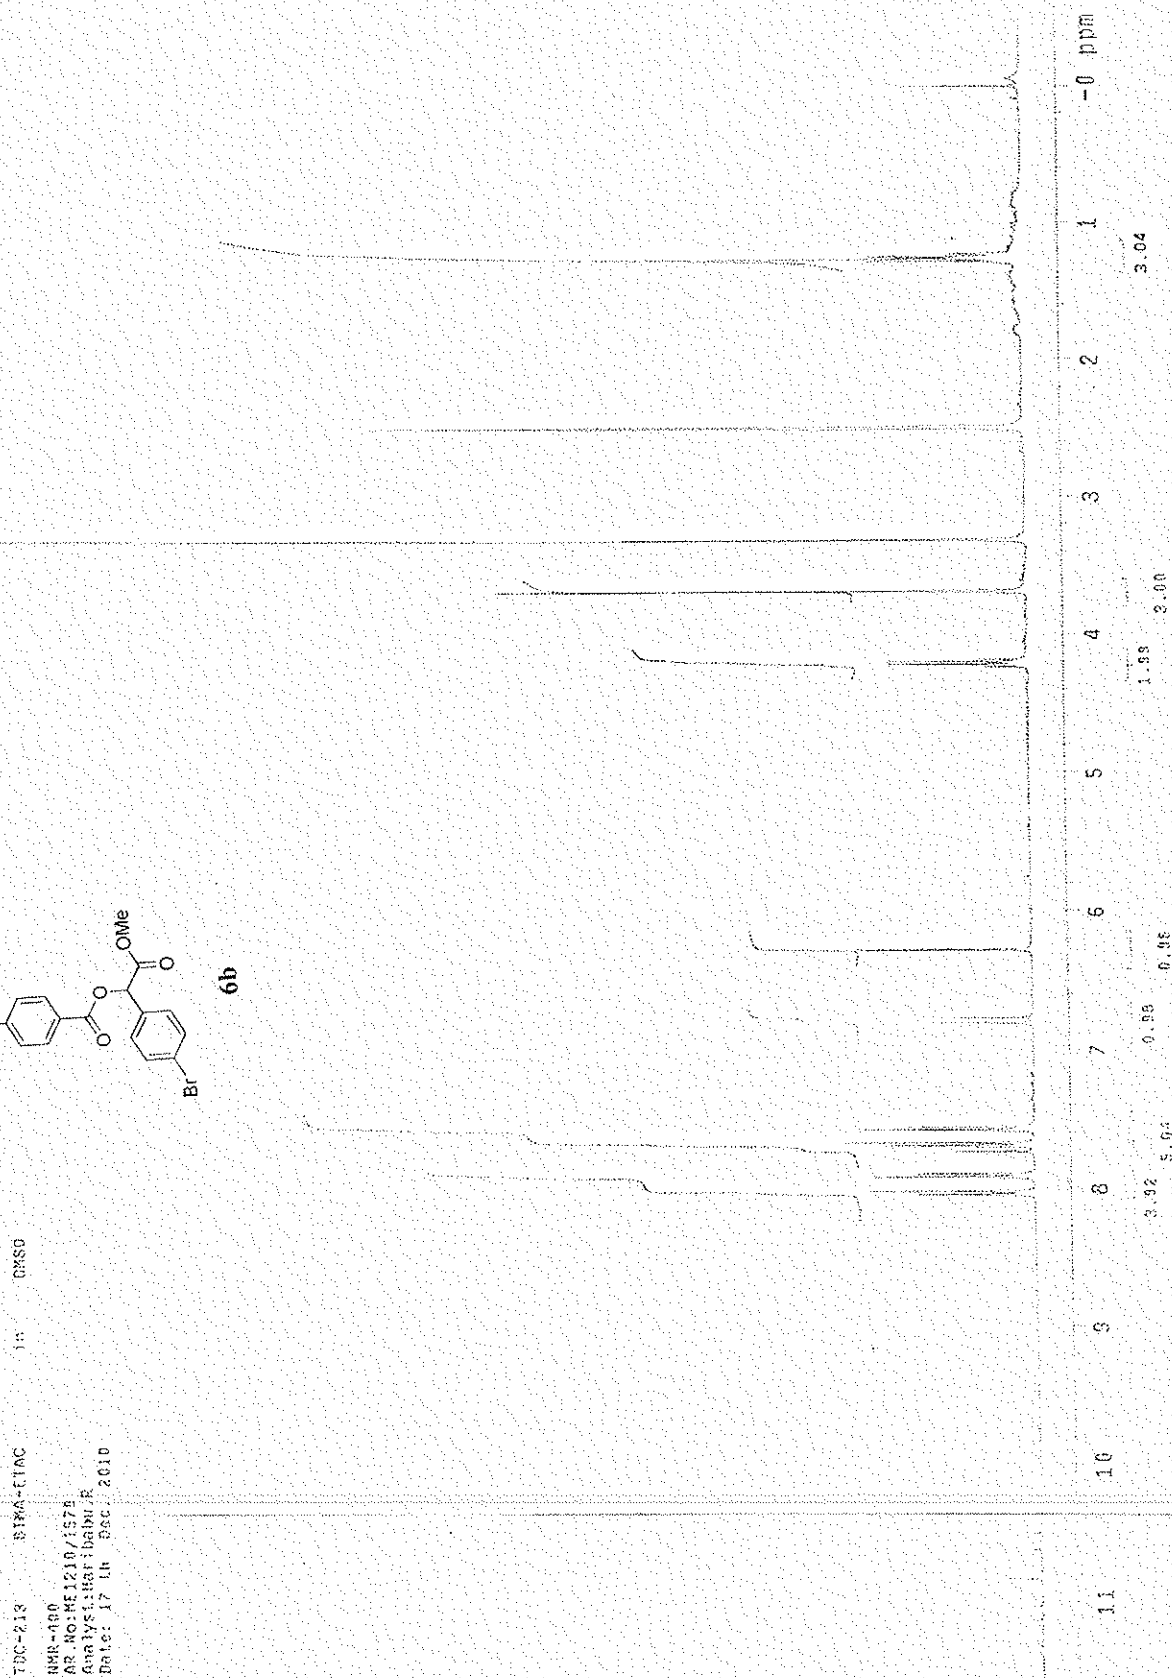



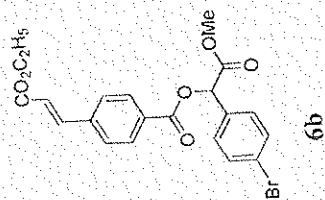

TQC-213 SIMA-ETAC  
NMR-400  
AR.NO:ME1210/2284  
Analyst:Heribabu.R  
Date: 23rd Dec. 2010

in DMSO

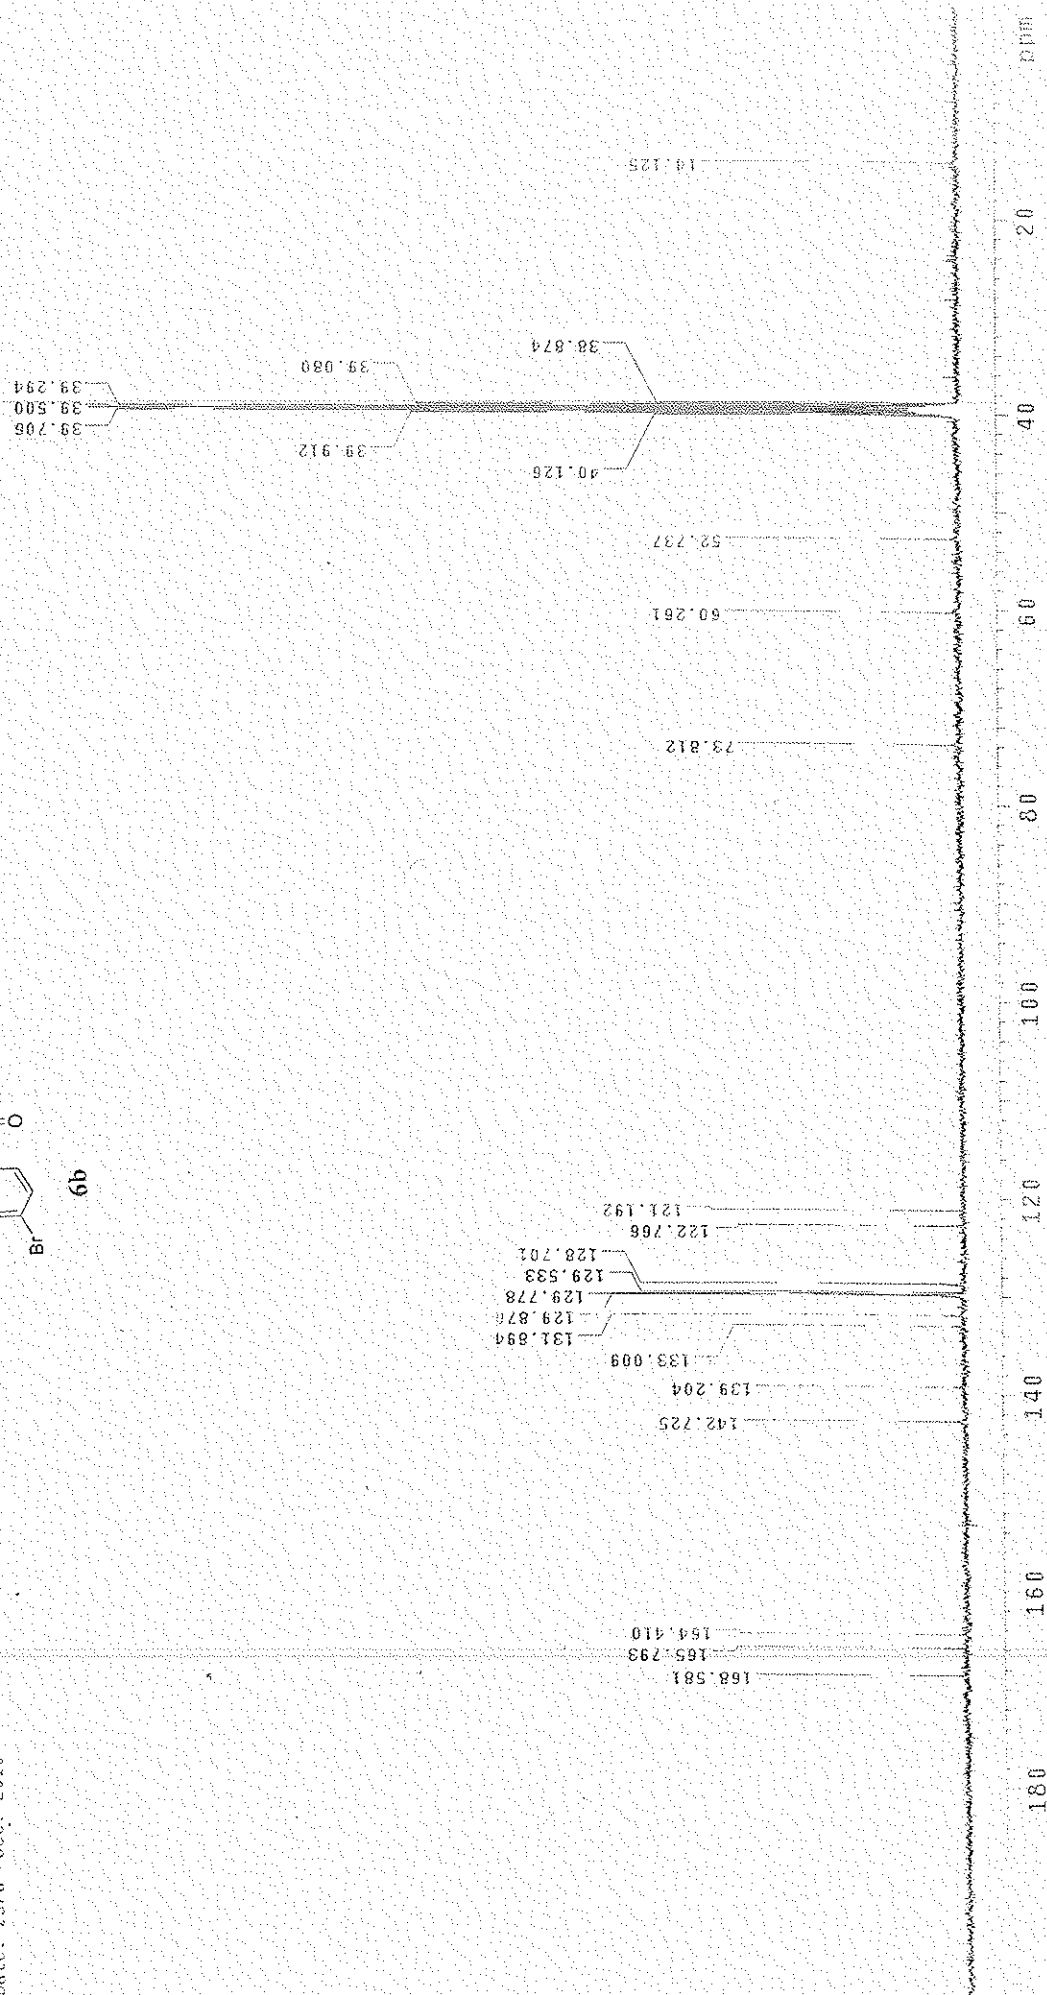

BIMAE/TAC

UT1210\_208 19 (0.353) Cm (17:26-53:64)

1: TOF MS ES+  
5.35e4

373.3061

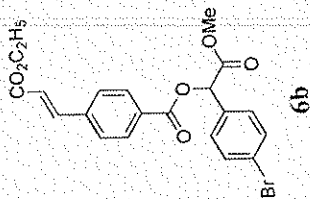

BIMAE/TAC TDC-213  
A.R.No.UT1210\208  
Kaviraj

792.6093

%

793.6127

374.3099

701.4883

295.2910

171.1879

242.2861

573.2553

475.3289

702.4816

794.6108

0

m/z

1000

950

900

850

800

750

700

650

600

550

500

450

400

350

300

250

200

150

# Elemental Composition Report

## Single Mass Analysis

Tolerance = 19.0 PPM / DBE: min = -1.0, max = 80.0  
Element prediction: Off  
Number of isotope peaks used for i-FIT = 3

Monoisotopic Mass, Even Electron Ions  
57 formula(e) evaluated with 2 results within limits (up to 4 best isotopic matches for each mass)  
Elements Used:

C: 0-35 H: 0-50 O: 0-6 Br: 0-1

BIMAEETAC  
UT1210\_208 19 (0.353) Cm (17:27-58:72)

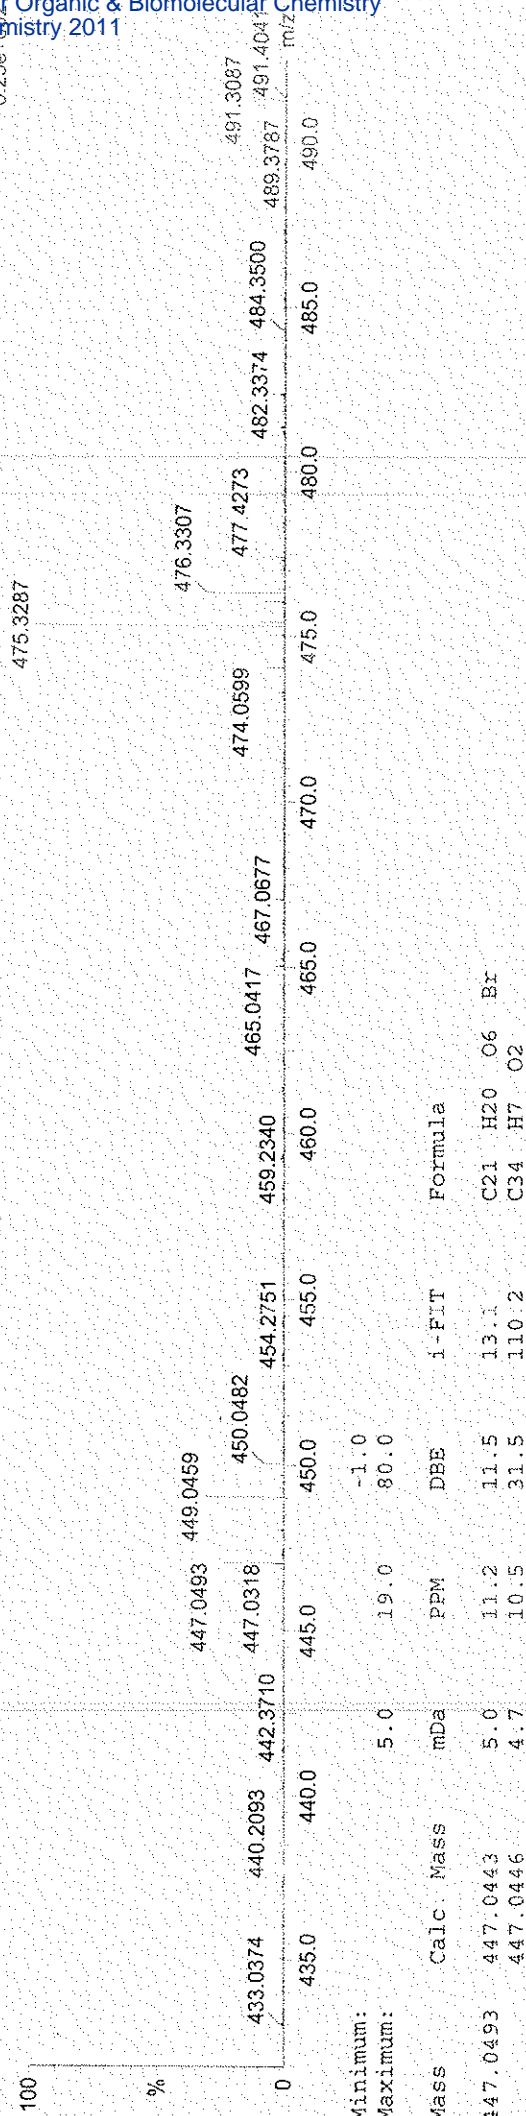

Minimum:  
Maximum:

5.0 19.0 -1.0  
80.0

| Mass     | Calc. Mass | mDa | PPM  | DBE  | i-FIT | Formula       |
|----------|------------|-----|------|------|-------|---------------|
| 447.0493 | 447.0443   | 5.0 | 11.2 | 11.5 | 13.1  | C21 H20 O6 Br |
| 447.0446 |            | 4.7 | 10.5 | 31.5 | 110.2 | C34 H7 O2     |

nm

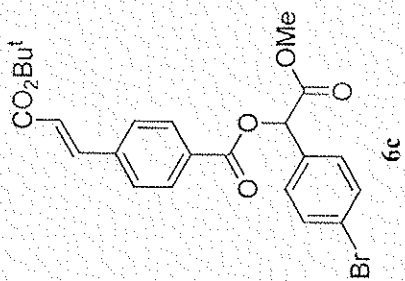

TDC-213 BIMA-TBAC  
NMR-400  
AR NO: ME1210/1578  
Analyst: Haribabu.R  
Date: 17 th Dec. 2010

in DMSC

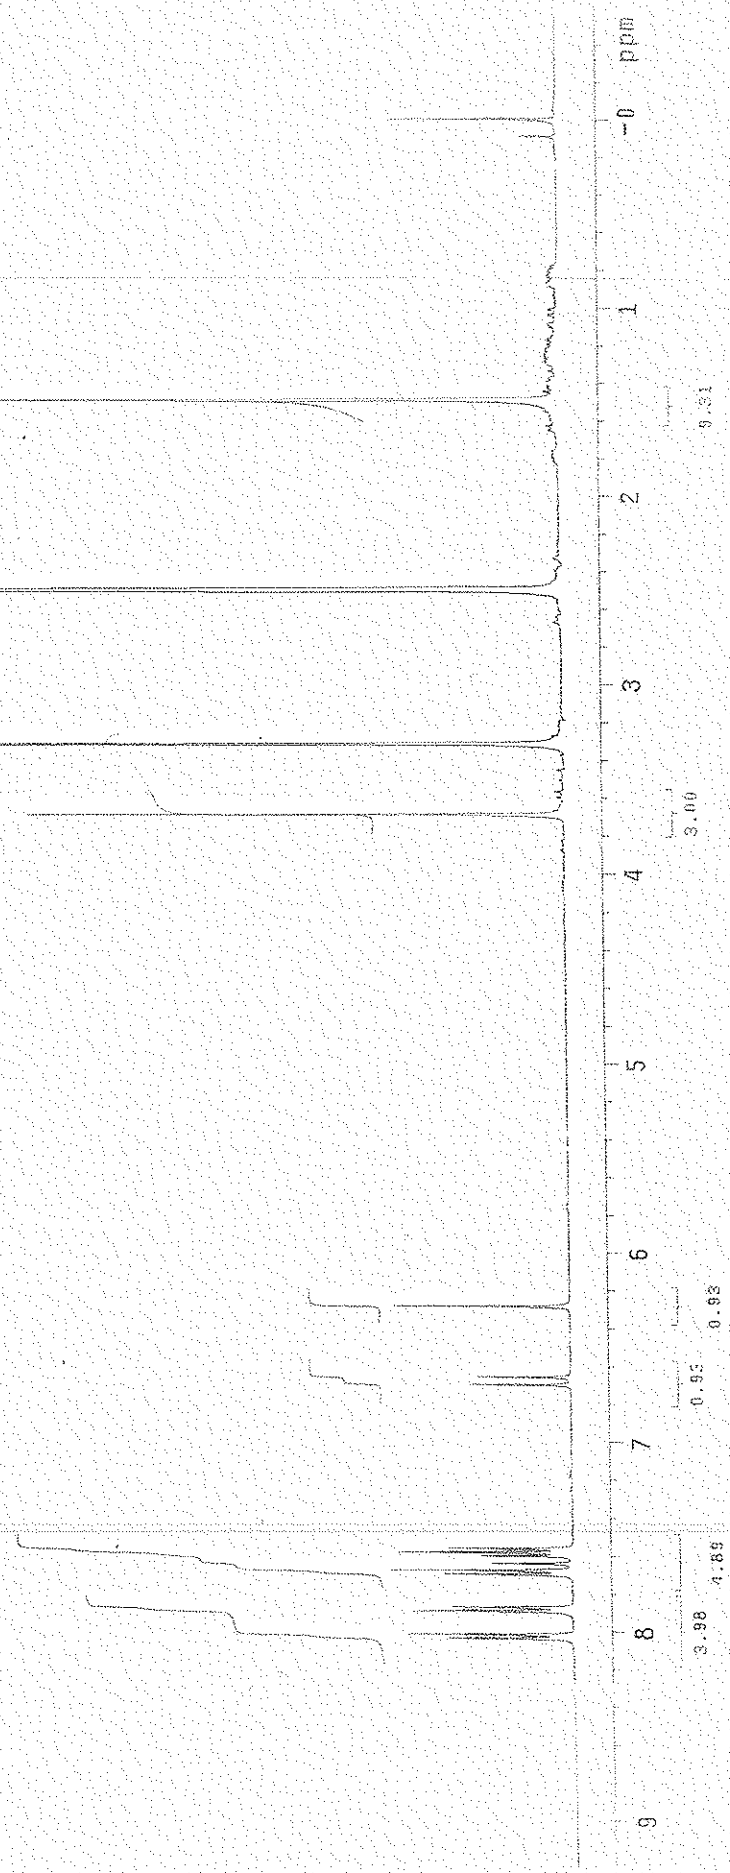



24/11/10

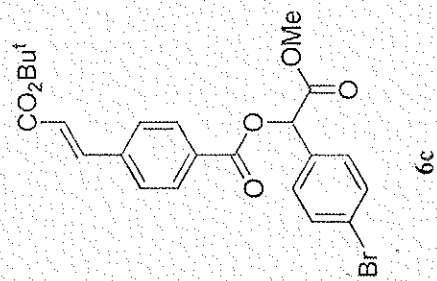

1DC-213 BINA-TBAC  
NMR-400  
AR No: ME1210/2283  
Analyst: Haribabu.S  
Date: 25th Dec. 2010

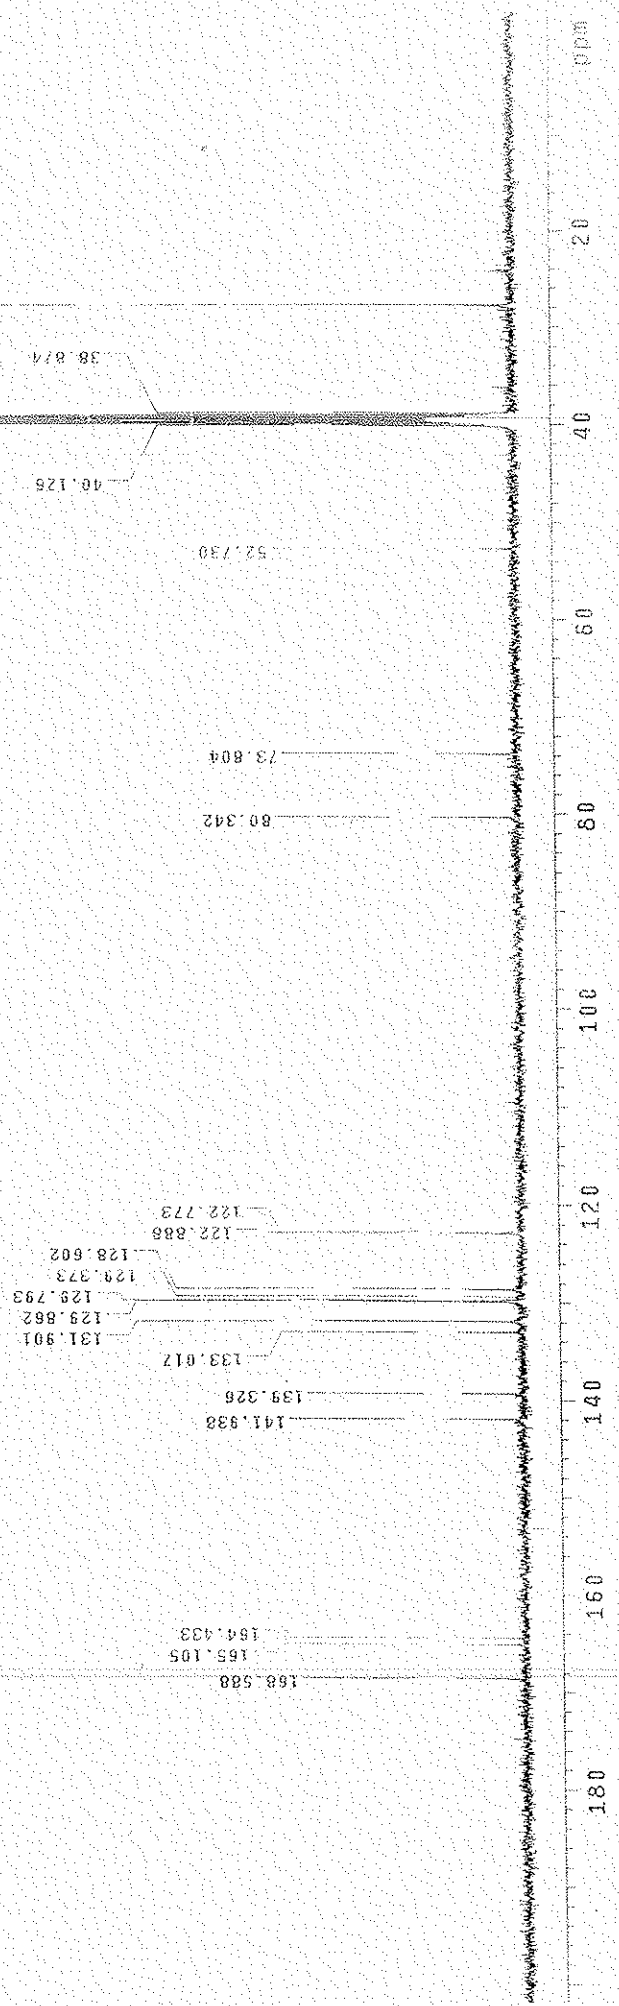

BIMA/TBAC CYLD

Aurigene Discovery Technologies, Hyderabad

02-Mar-2011  
Lakshmikanth  
1: TOF MS ES  
3.3460

UT0311\_020A 14 (0.251) Cm (6:14-72:80x0.010)  
238.8943

100

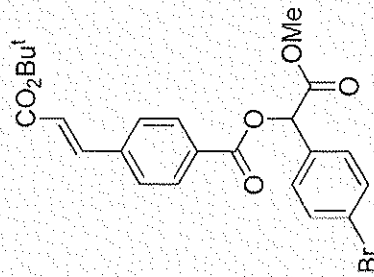

6c

BIMA/TBAC CYLD  
Date: 02.MAR. 2011  
A.R.No.UT0311/020  
Lakshmikanth

%

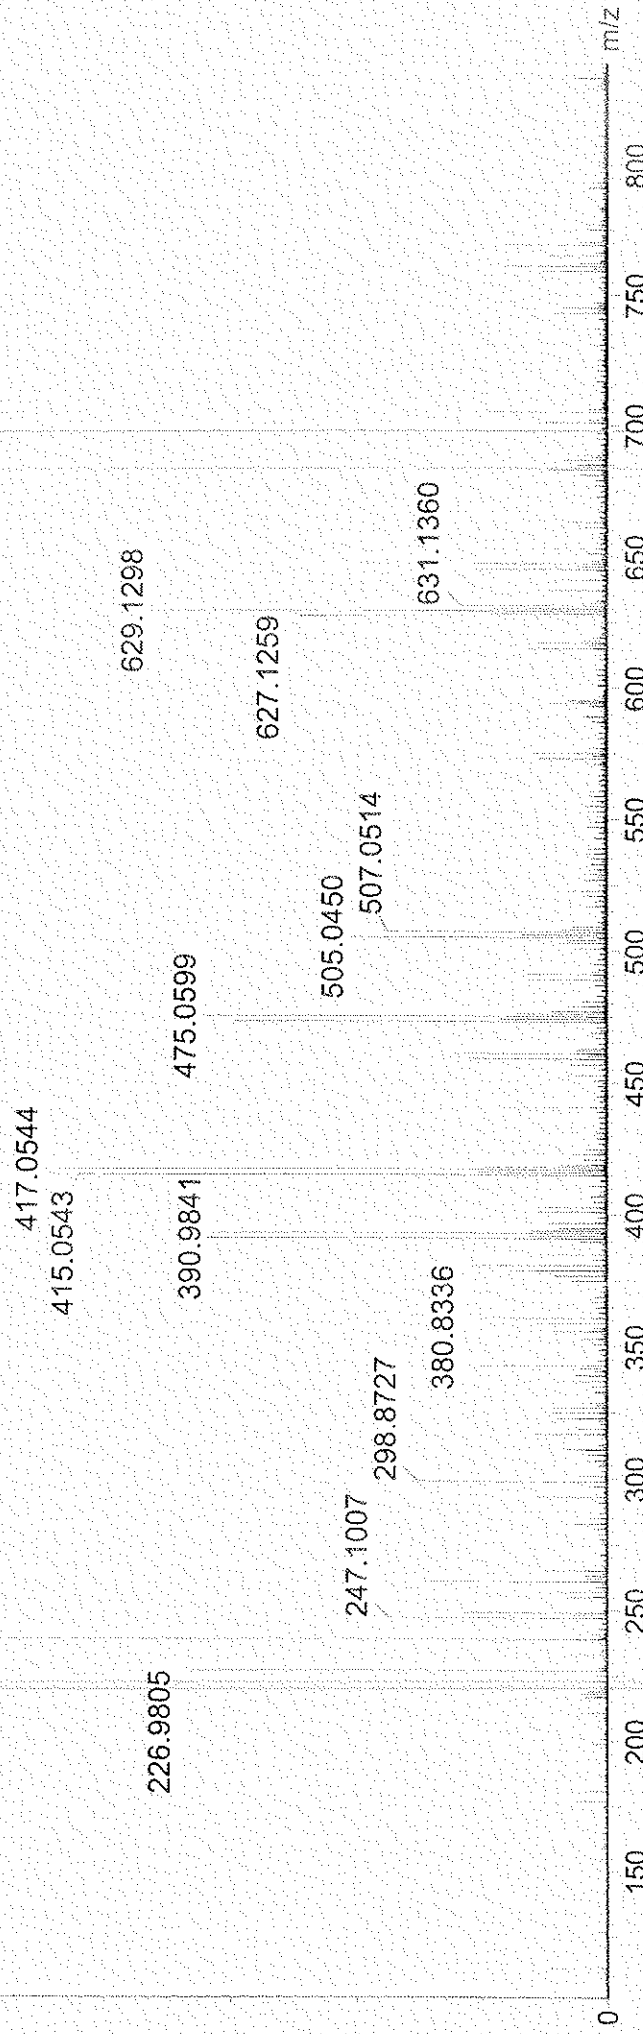

m/z

Elemental Composition Report

Single Mass Analysis

Tolerance = 5.0 PPM / DBE: min = -1.0, max = 15.0  
Element prediction: Off  
Number of isotope peaks used for i-FIT = 3

Monoisotopic Mass, Even Electron Ions  
16 formula(e) evaluated with 1 results within limits (up to 5 best isotopic matches for each mass)  
Elements Used:  
C: 0-26 H: 0-25 O: 0-7 Br: 0-1

BIMATBAC CYLD

Aurigene Discovery Technologies, Hyderabad

UT0311\_020A 14 (0.251) Cm (6:14-72:80x0.010)

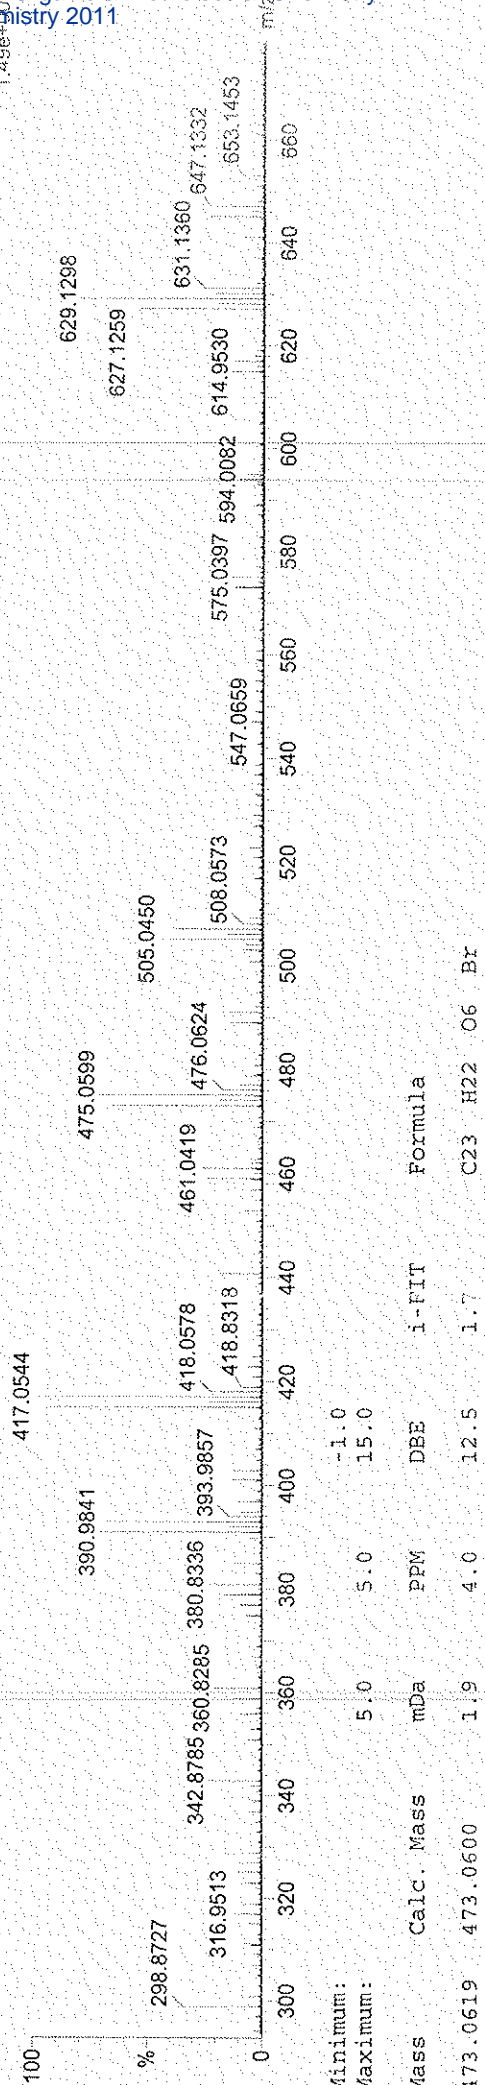

Minimum: -1.0  
Maximum: 15.0

| Mass     | Calc. Mass | mDa | PPM | DBE  | i-FIT | Formula       |
|----------|------------|-----|-----|------|-------|---------------|
| 473.0619 | 473.0600   | 1.9 | 4.0 | 12.5 | 1.7   | C23 H22 O6 Br |

TDC-213 MEAC in DMSO

NMR-400

AR No: ME1110/1283

Analyst: Haribabu.R

Date: 18 th Nov 2010

Sample Name:

1283-TDC-213\_MEAC

Data Collected on:

mercuryj-mercury400

Archive directory:

/home/sms50/routine/Nov2010/d\_18

Sample directory:

1283-TDC-213\_MEAC\_20101118\_01

FidFile: 1283-TDC-213\_MEAC\_20101118\_01

6d

Pulse Sequence: PROTON (s2pu1)

Solvent: dmsO

Data collected on: Nov 18 2010

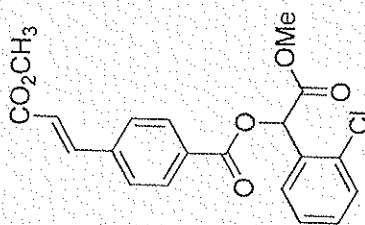

VARIAN

Nov 18/10

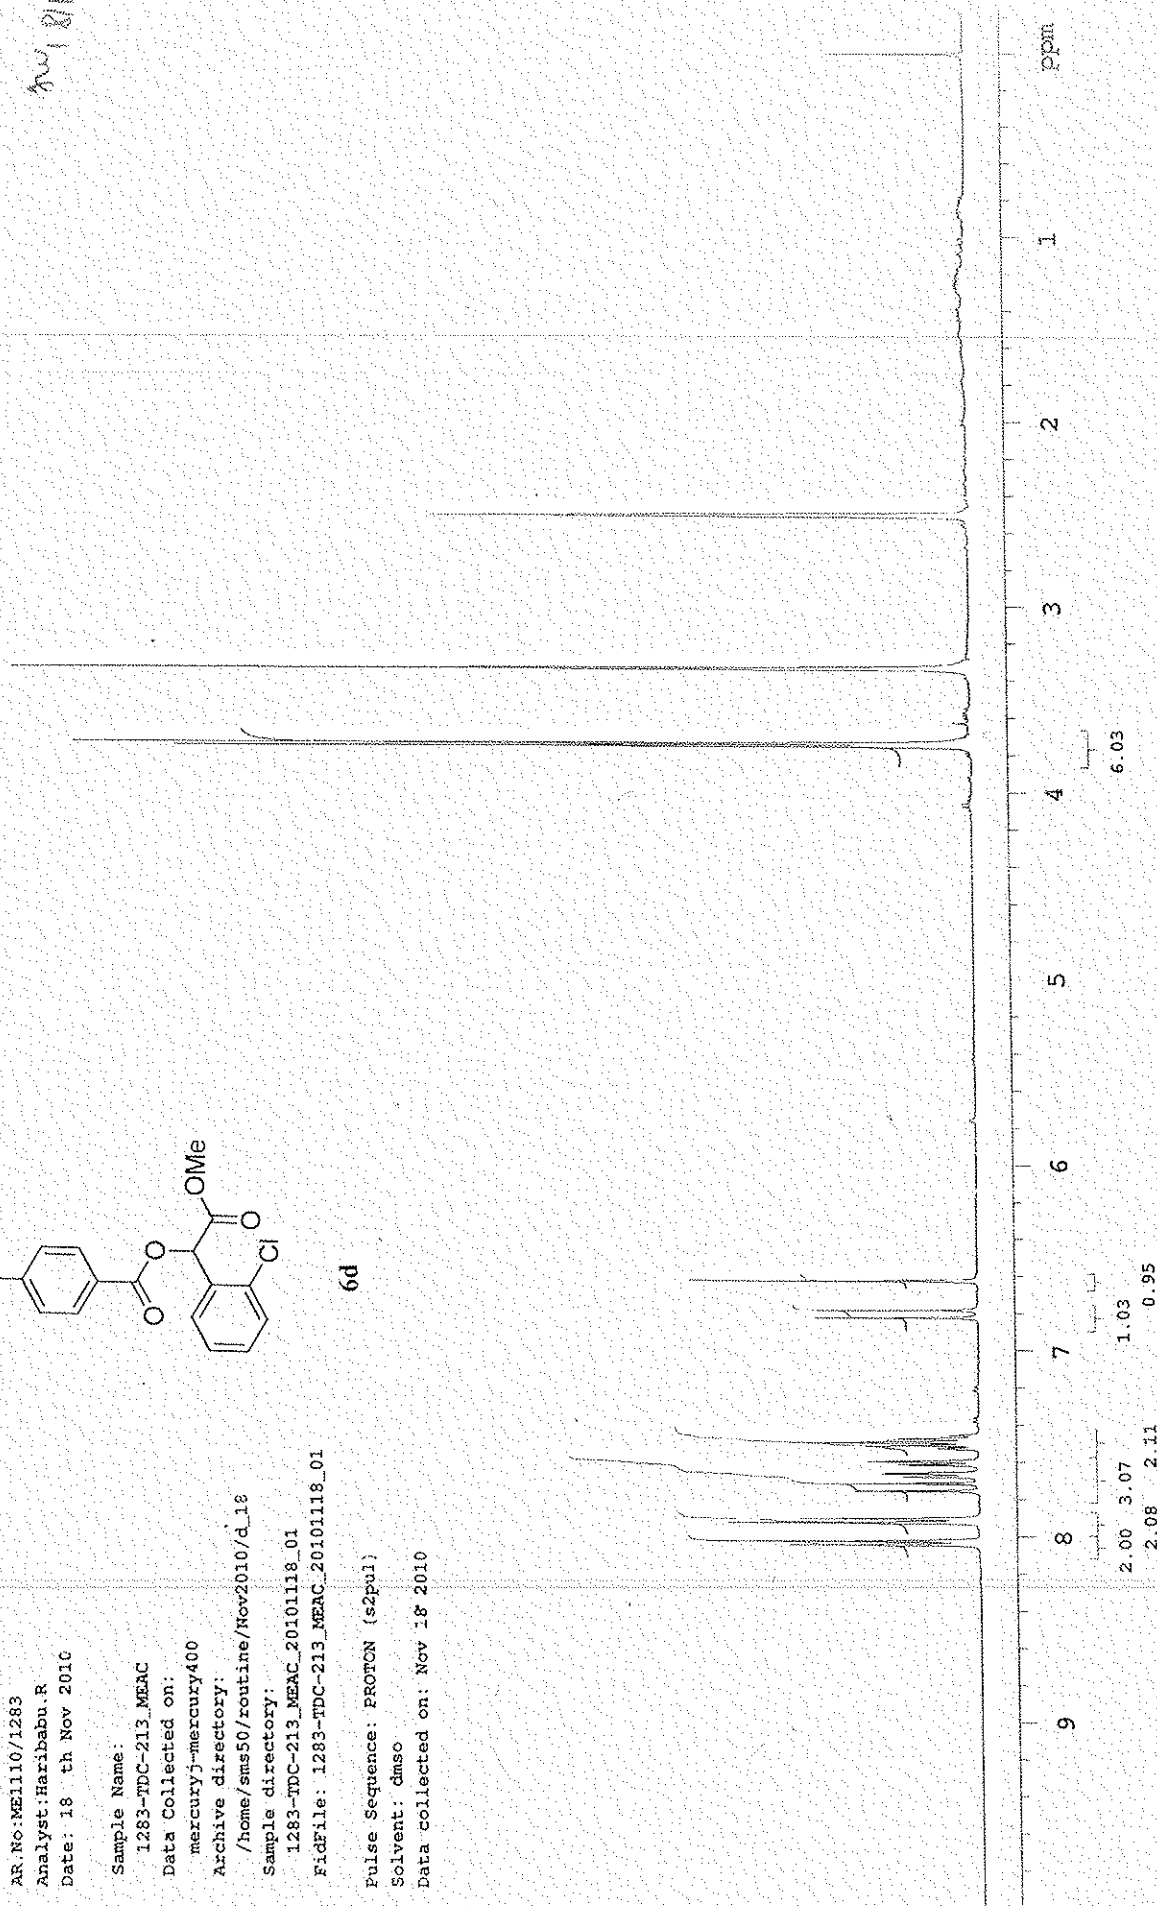

Plotname: 1283-TDC-213\_MEAC\_20101118\_01\_plot01



MEAC in DMSO  
TDC-213  
AR NO:CE1210/04  
Analyst:Haribabu.R  
Date: 2nd Dec., 2010

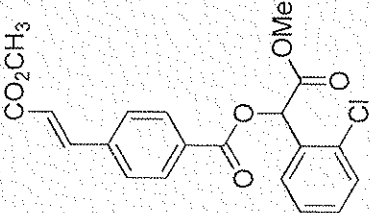

p9

AR&D, Aurigene Discovery Technologies Ltd, Hyderabad  
Instrument : Gemini 2000 (Varian 200MHz)  
Date & Time : Thu Dec 2 14:17:36 GMT 2010  
Recorded By : Haribabu.R

for 2/n

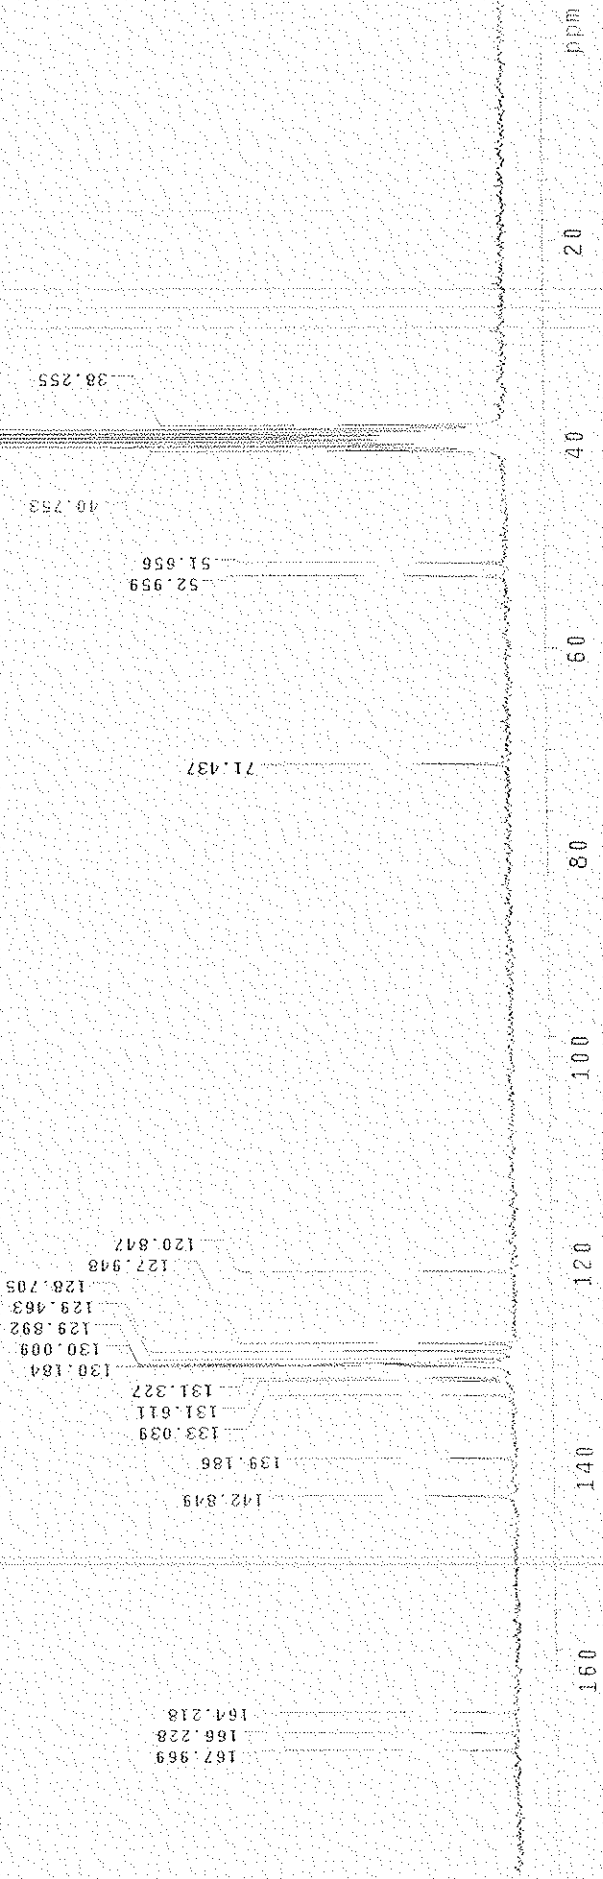

03/12/10  
-031210  
9.99e5

CNYL MEAC TDC-213  
A.R.No.UT1210\13  
Kaviraj

MEAC

UT1210\_13\_34 (0.634) Cm (33.40-93:103)

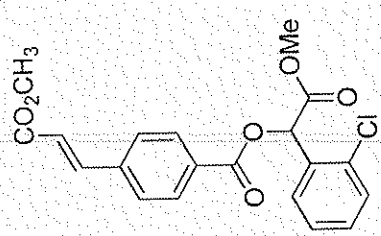

6d

389.0783

391.0771

311.0834

412.2033

329.0579

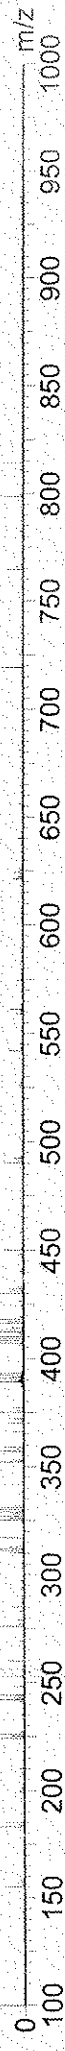

# Elemental Composition Report

## Single Mass Analysis

Tolerance = 5.0 PPM / DBE: min = -1.0, max = 80.0  
Element prediction: Off  
Number of isotope peaks used for i-FIT = 3

Monoisotopic Mass, Even Electron Ions  
79 formula(e) evaluated with 1 results within limits (up to 4 best isotopic matches for each mass)

Elements Used:

C: 0-40 H: 0-55 O: 0-8 Cl: 0-1

MEAC

UT1210\_13 34 (0.634) Cm (33:40-93:103)

1: TOF MS ES+  
9.99e+03

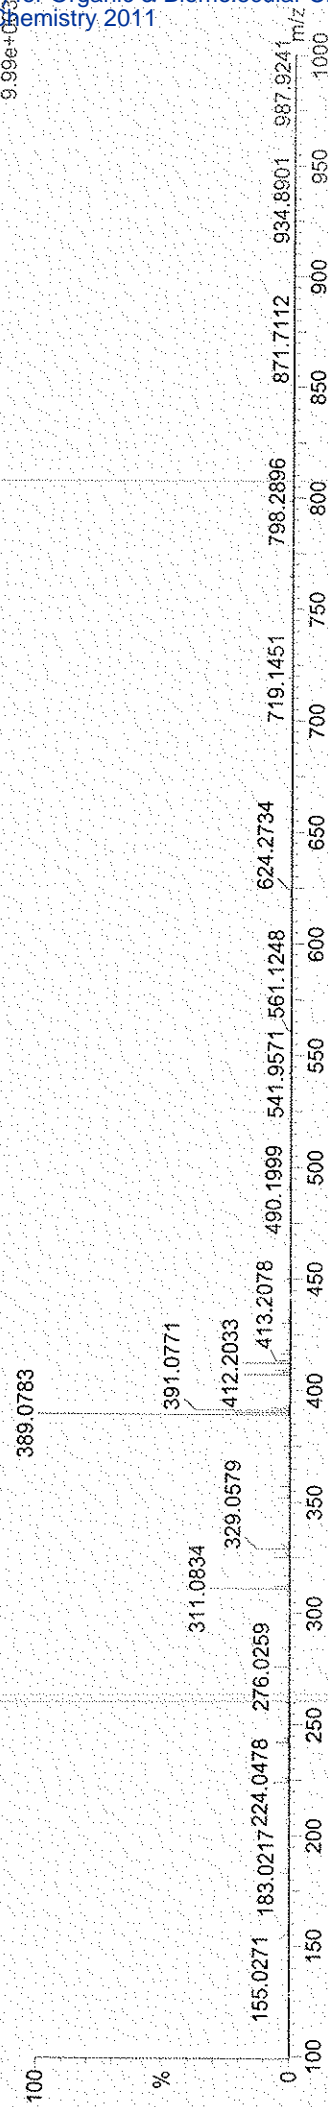

|          |            |      |      |      |               |
|----------|------------|------|------|------|---------------|
| Minimum: | 5.0        | 5.0  | -1.0 |      |               |
| Maximum: |            |      | 80.0 |      |               |
| Mass     | Calc. Mass | mDa  | PPM  | DBE  | i-FIT         |
|          |            |      |      |      | Formula       |
| 389.0783 | 389.0792   | -0.9 | -2.3 | 11.5 | 3.5           |
|          |            |      |      |      | C20 H18 O6 Cl |

VARIAN

TDC-213 ETAC in CDCl3

NMR-400

AP.No:ME1110/1408

Analyst:Haribabu.R

Date: 19 th Nov 2010

Sample Name:

1408-TDC-213\_ETAC

Data Collected on:

mercuryj-mercury400

Archive directory:

/home/sms50/routine/Nov2010/d\_19

Sample directory:

1408-TDC-213\_ETAC\_20101119\_02

File: 1408-TDC-213\_ETAC\_20101119\_01

Pulse Sequence: PROTON (s2pul)

Solvent: cdcl3

Data collected on: Nov 19 2010

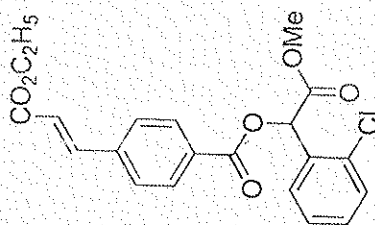

6c

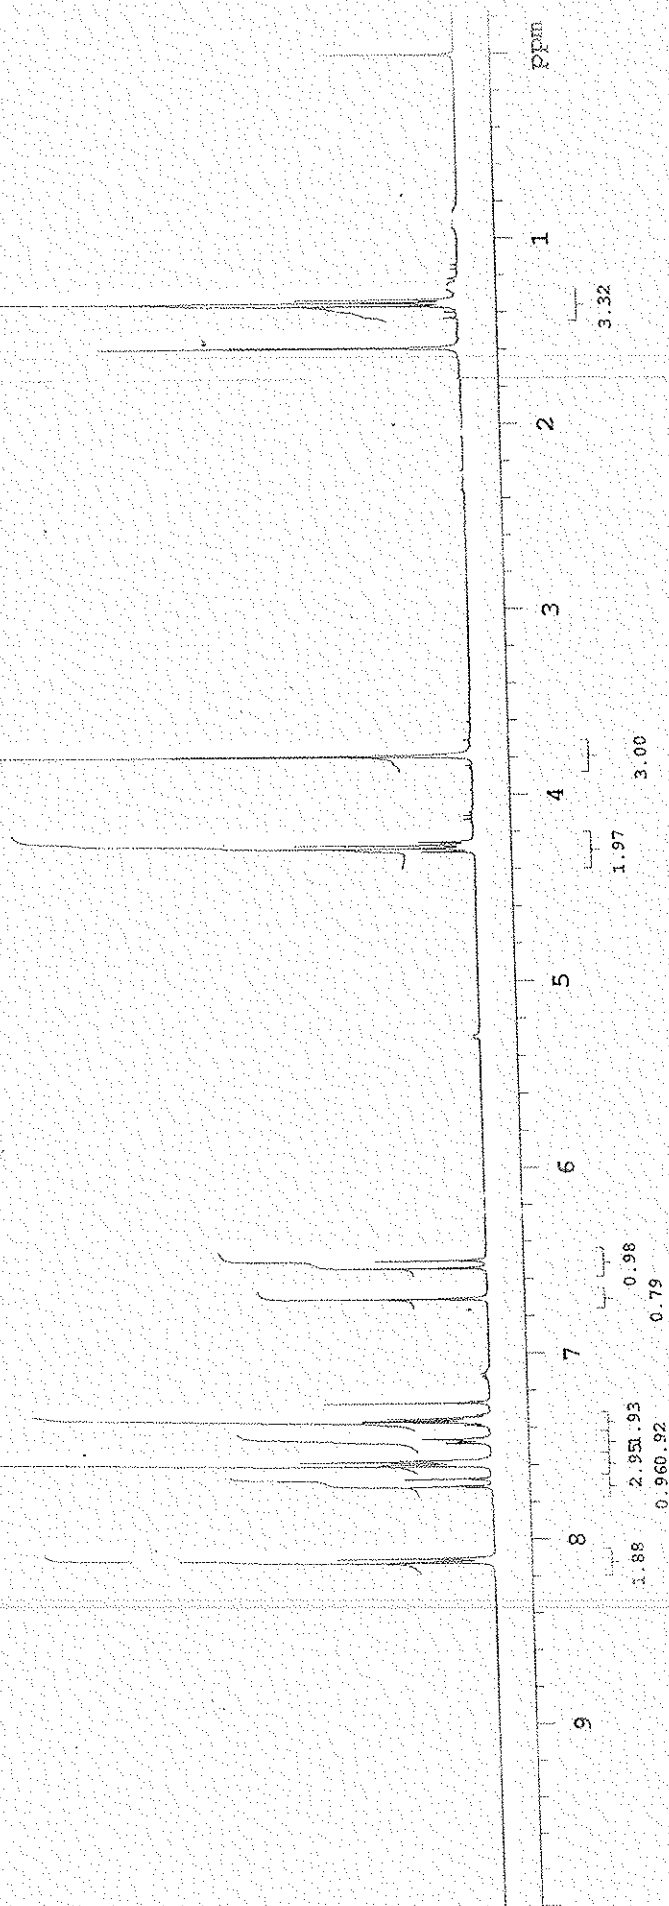

Plotname: 1408-TDC-213\_ETAC\_20101119\_01\_plot01



30/11  
2011

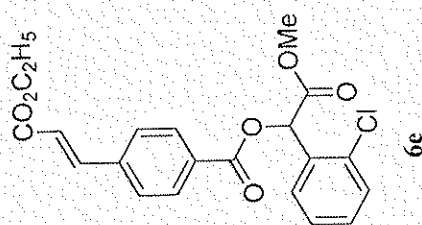

TDC-213 EtAC in DMSO  
NMR-400  
AR.No:ME1110/2132  
Analyst:Shruthi  
Date: 30th Nov 2010

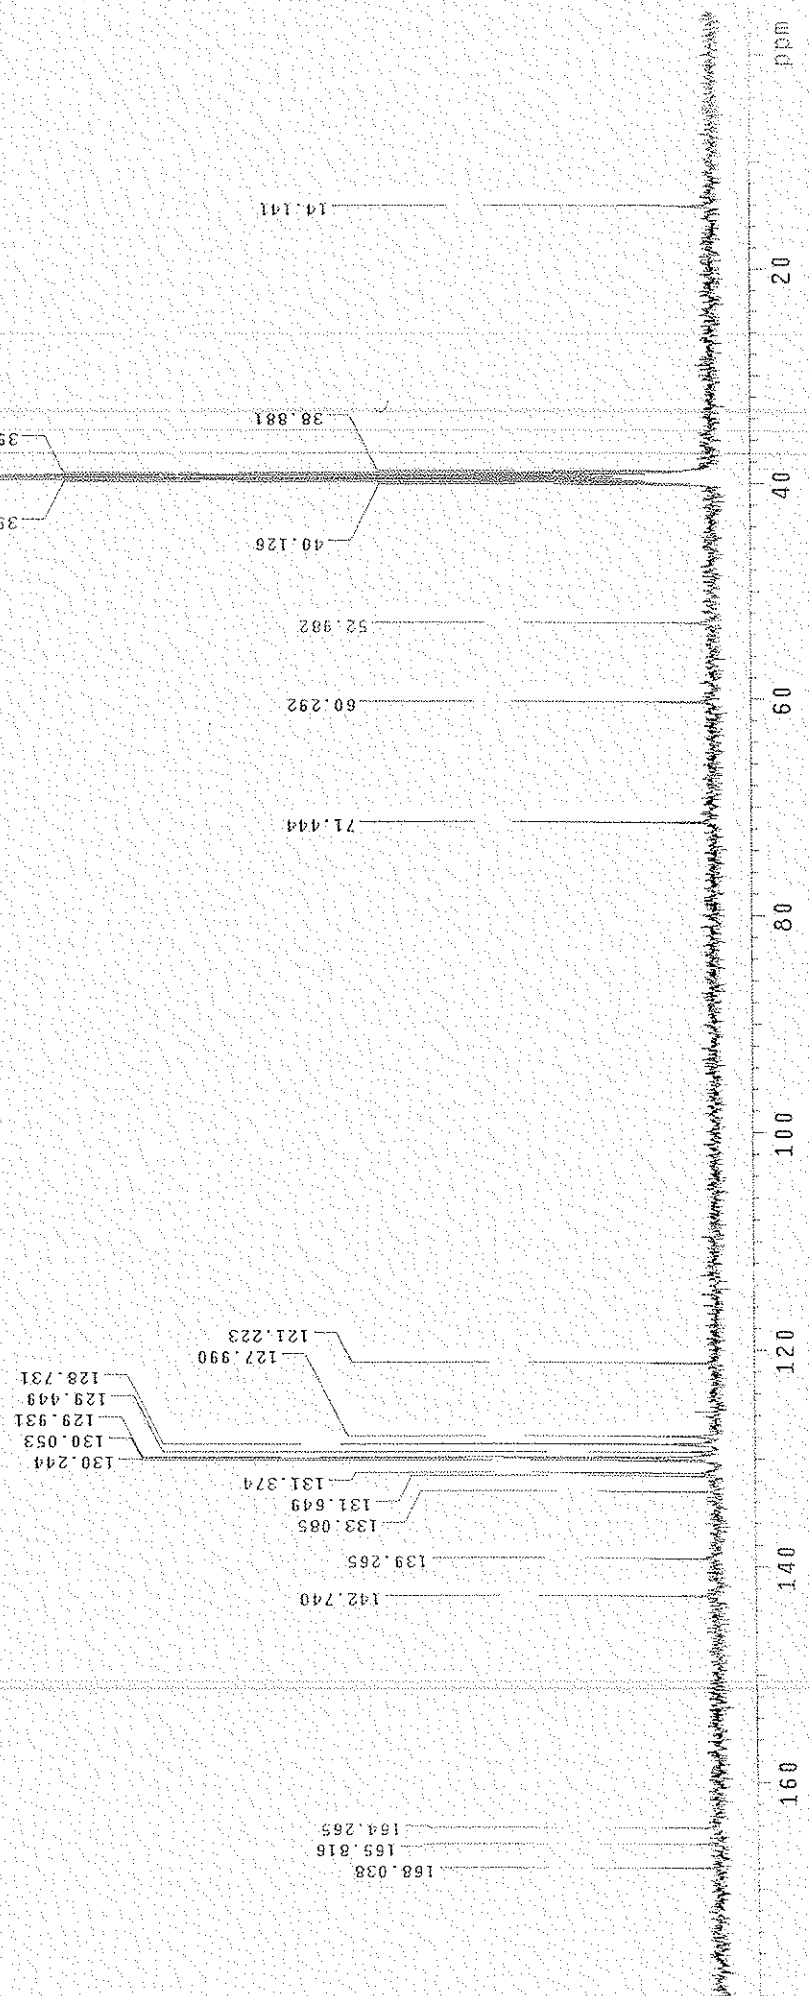

03/12/10

1: TOF MS ES+  
7.69e6

ETAC

UT1210\_14 19 (0.352) Cm (18:28-80:89)

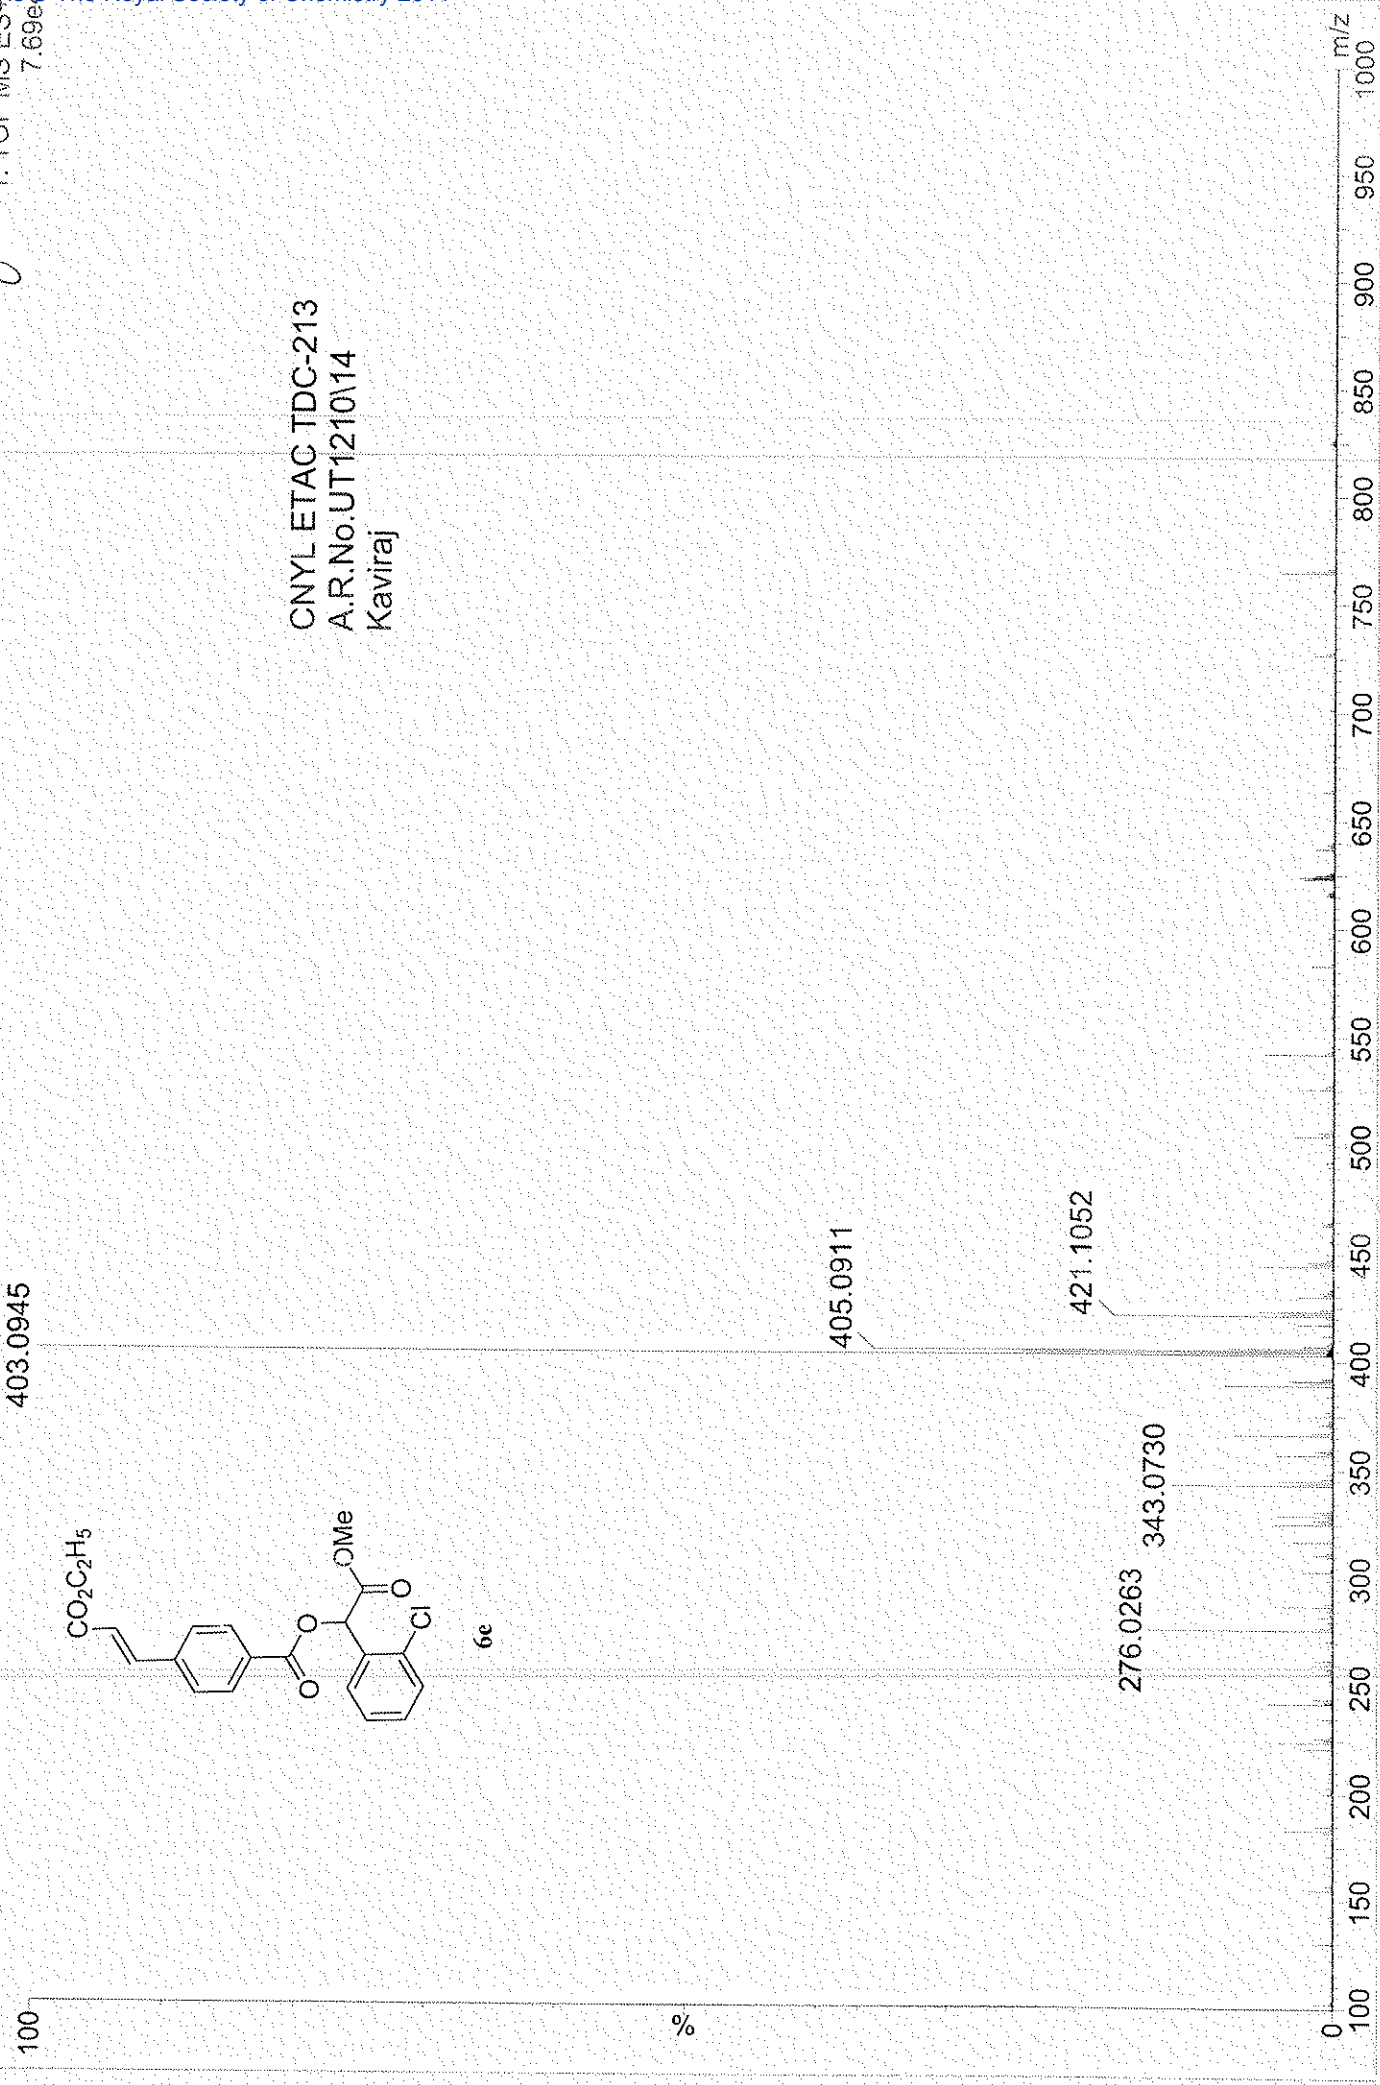

CNYL ETAC TDC-213  
A.R.No.UT1210\14  
Kaviraj

# Elemental Composition Report

## Single Mass Analysis

Tolerance = 5.0 PPM / DBE: min = -1.0, max = 80.0  
Element prediction: Off  
Number of isotope peaks used for i-FIT = 3

## Monoisotopic Mass, Even Electron Ions

84 formula(e) evaluated with 1 results within limits (up to 4 best isotopic matches for each mass)

Elements Used:

C: 0-40 H: 0-55 O: 0-8 Cl: 0-1

ETAC

UT1210\_14 19 (0.352) Cm (18.28-80.89)

1: TOF MS ESI  
7.69e+03

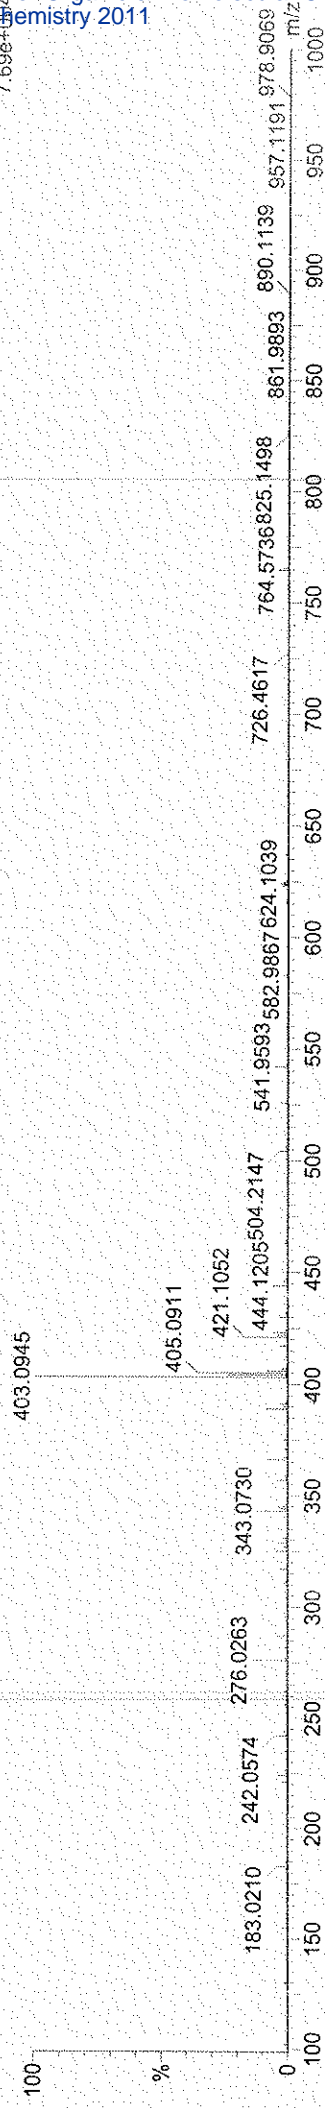

Minimum: -1.0  
Maximum: 80.0

| Mass     | Calc. Mass | mDa  | PPM  | DBE  | i-FIT | Formula       |
|----------|------------|------|------|------|-------|---------------|
| 403.0945 | 403.0948   | -0.3 | -0.7 | -1.5 | 3.7   | C21 H20 O6 Cl |

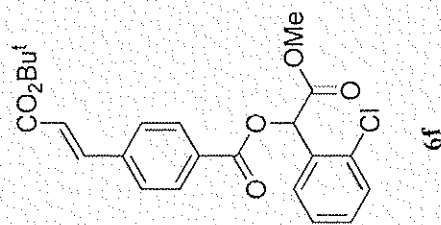

TDC-213 TBAC in DMSO  
NMR-400  
AR No: ME1110/1724  
Analyst: Hari Babu.R  
Date: 23 th Nov 2010

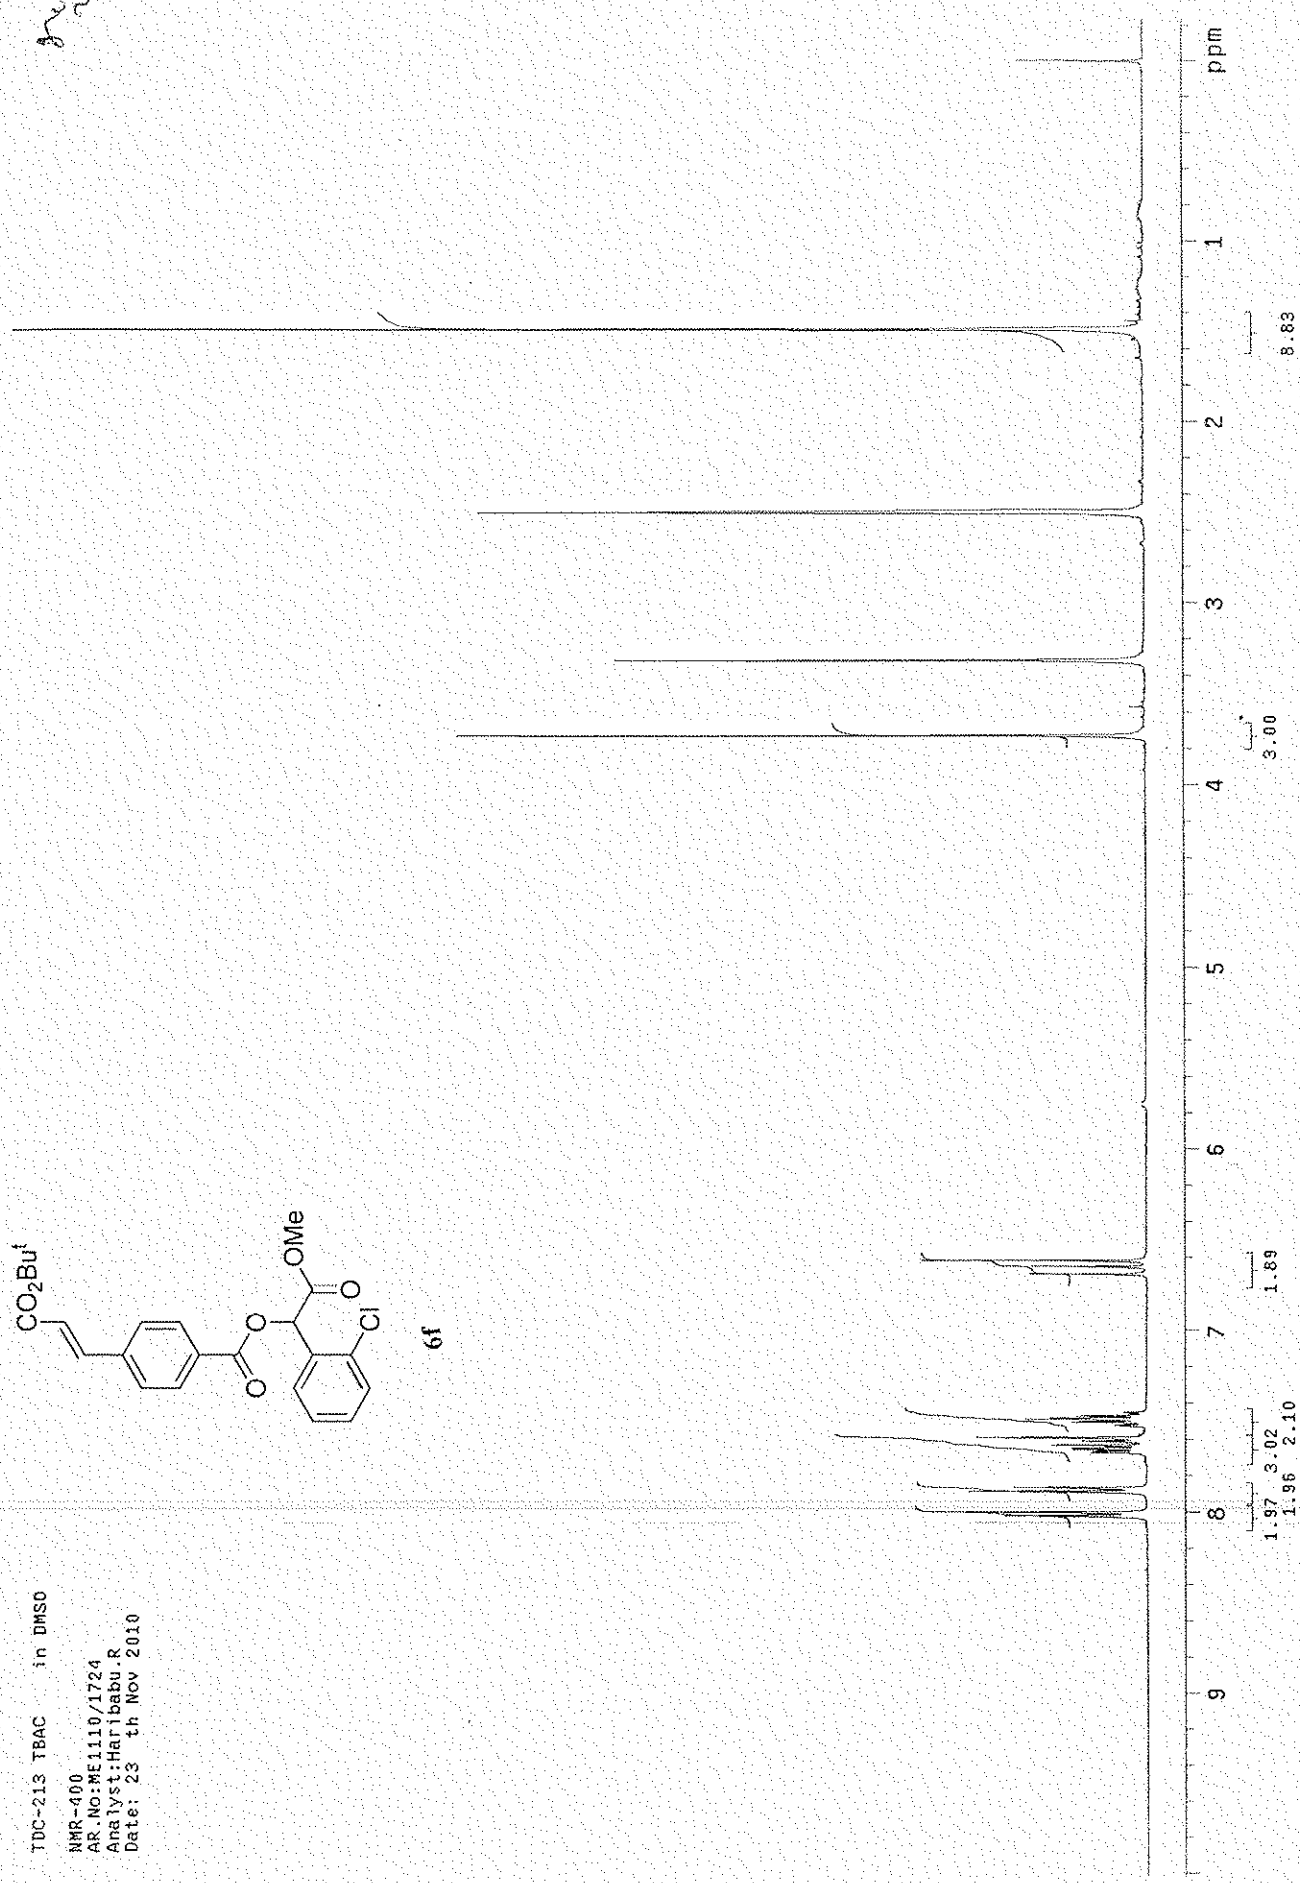



24/12

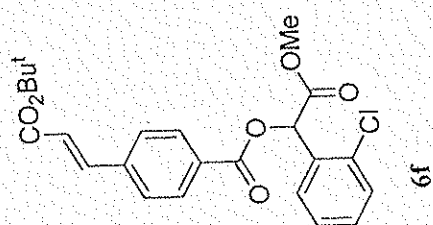

TDC-213 T8AC in DMSO  
NMR-400  
AR, NO: ME1210/655  
Analyst: Haribabu.R  
Date: 7 th Dec. 2010

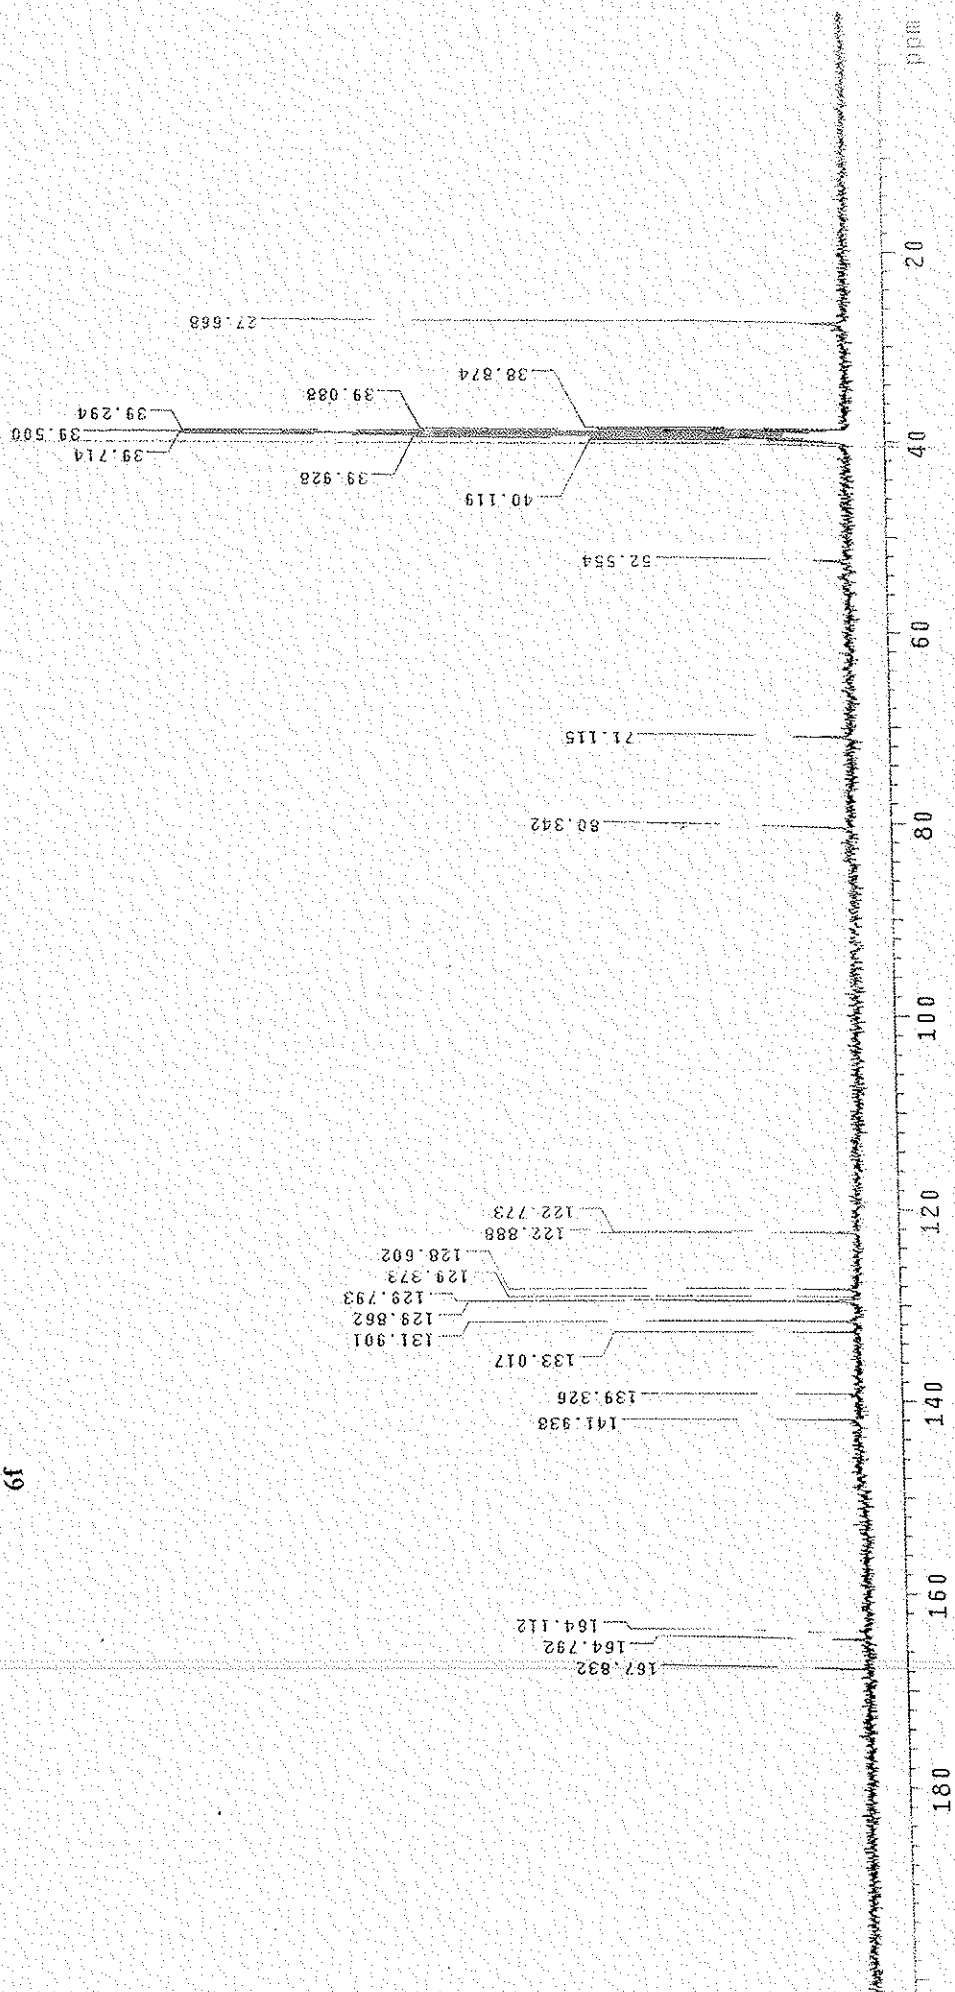

03/12/10

1: TOF MS ES+  
346eV

TBAC

UT1210\_15 6 (0.117) Cm (5:22-79:87)

375.0637

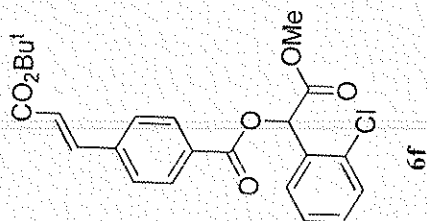

CNYL TBAC TDC-213  
A.R.No.UT1210\15  
Kaviraj

%

377.0621

336.2152

276.0273

242.0582

183.0211

102.1287

629.3936

764.5725

532.2474

765.5781

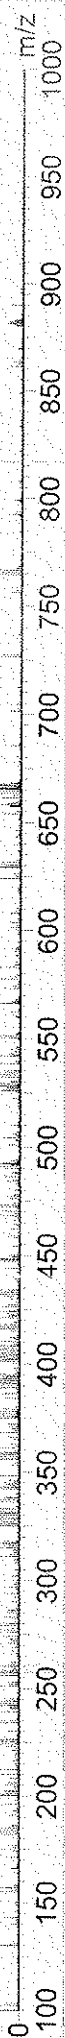

Elemental Composition Report

Single Mass Analysis

Tolerance = 5.0 PPM / DBE: min = -1.0, max = 80.0

Element prediction: Off

Number of isotope peaks used for i-FIT = 3

Monoisotopic Mass, Even Electron Ions

86 formula(e) evaluated with 2 results within limits (up to 4 best isotopic matches for each mass)

Elements Used:

C: 0-40 H: 0-55 O: 0-8 Cl: 0-1

TBAC

UT1210\_15.6 (0.117) Cm (5:22-79:87)

1: TOF MS ES+  
3.46e+05

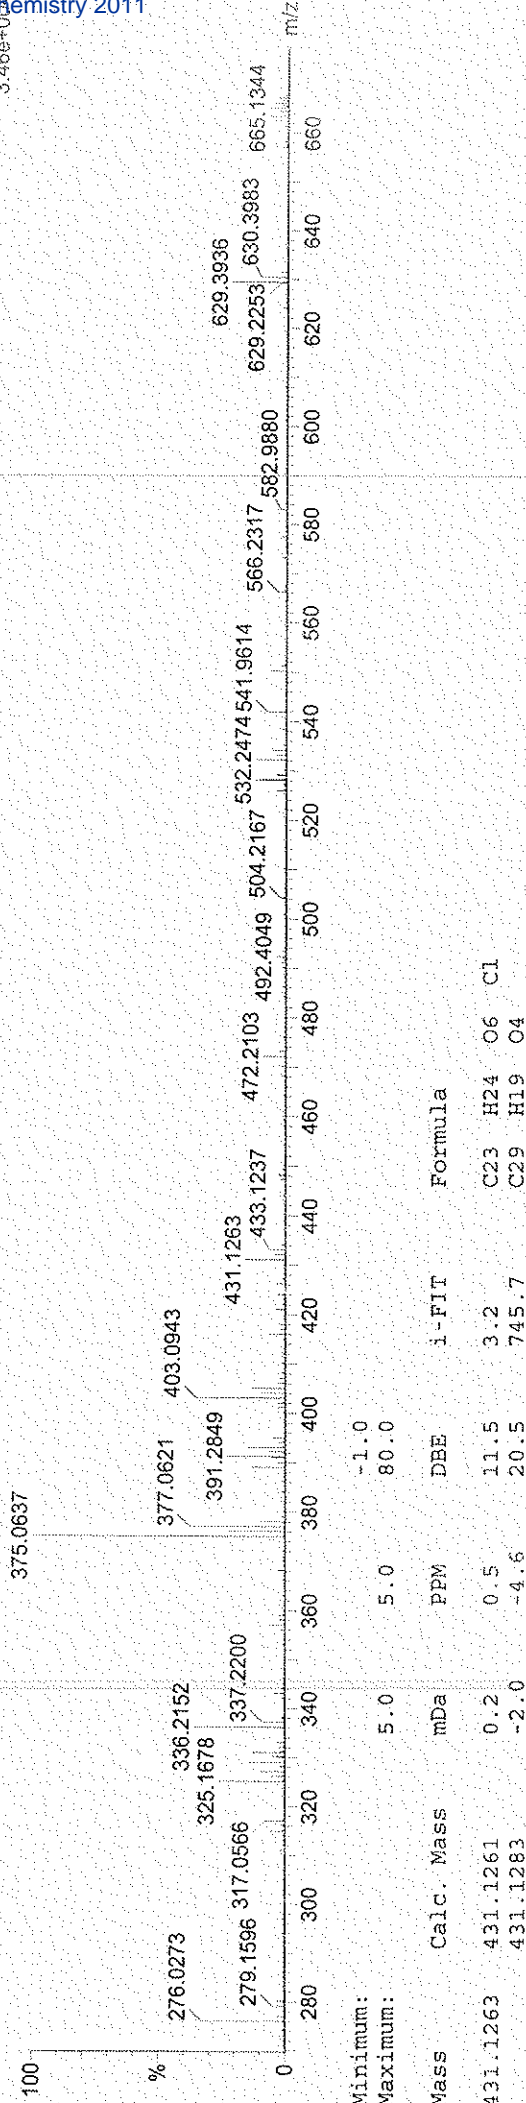

Minimum: -1.0  
Maximum: 80.0

| Mass     | Calc. Mass | mDa  | PPM  | DBE  | i-FIT | Formula       |
|----------|------------|------|------|------|-------|---------------|
| 431.1263 | 431.1261   | 0.2  | 0.5  | 11.5 | 3.2   | C23 H24 O6 Cl |
| 431.1283 | 431.1283   | -2.0 | -4.6 | 20.5 | 745.7 | C29 H19 O4    |

8a

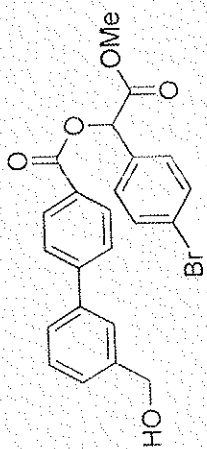

8a

TDC-213 SIMA/PHDA  
 NMR-400  
 AR.NO:ME0111/702  
 Analyst:Haribabu.R  
 Date: 07 th Jan. 2011

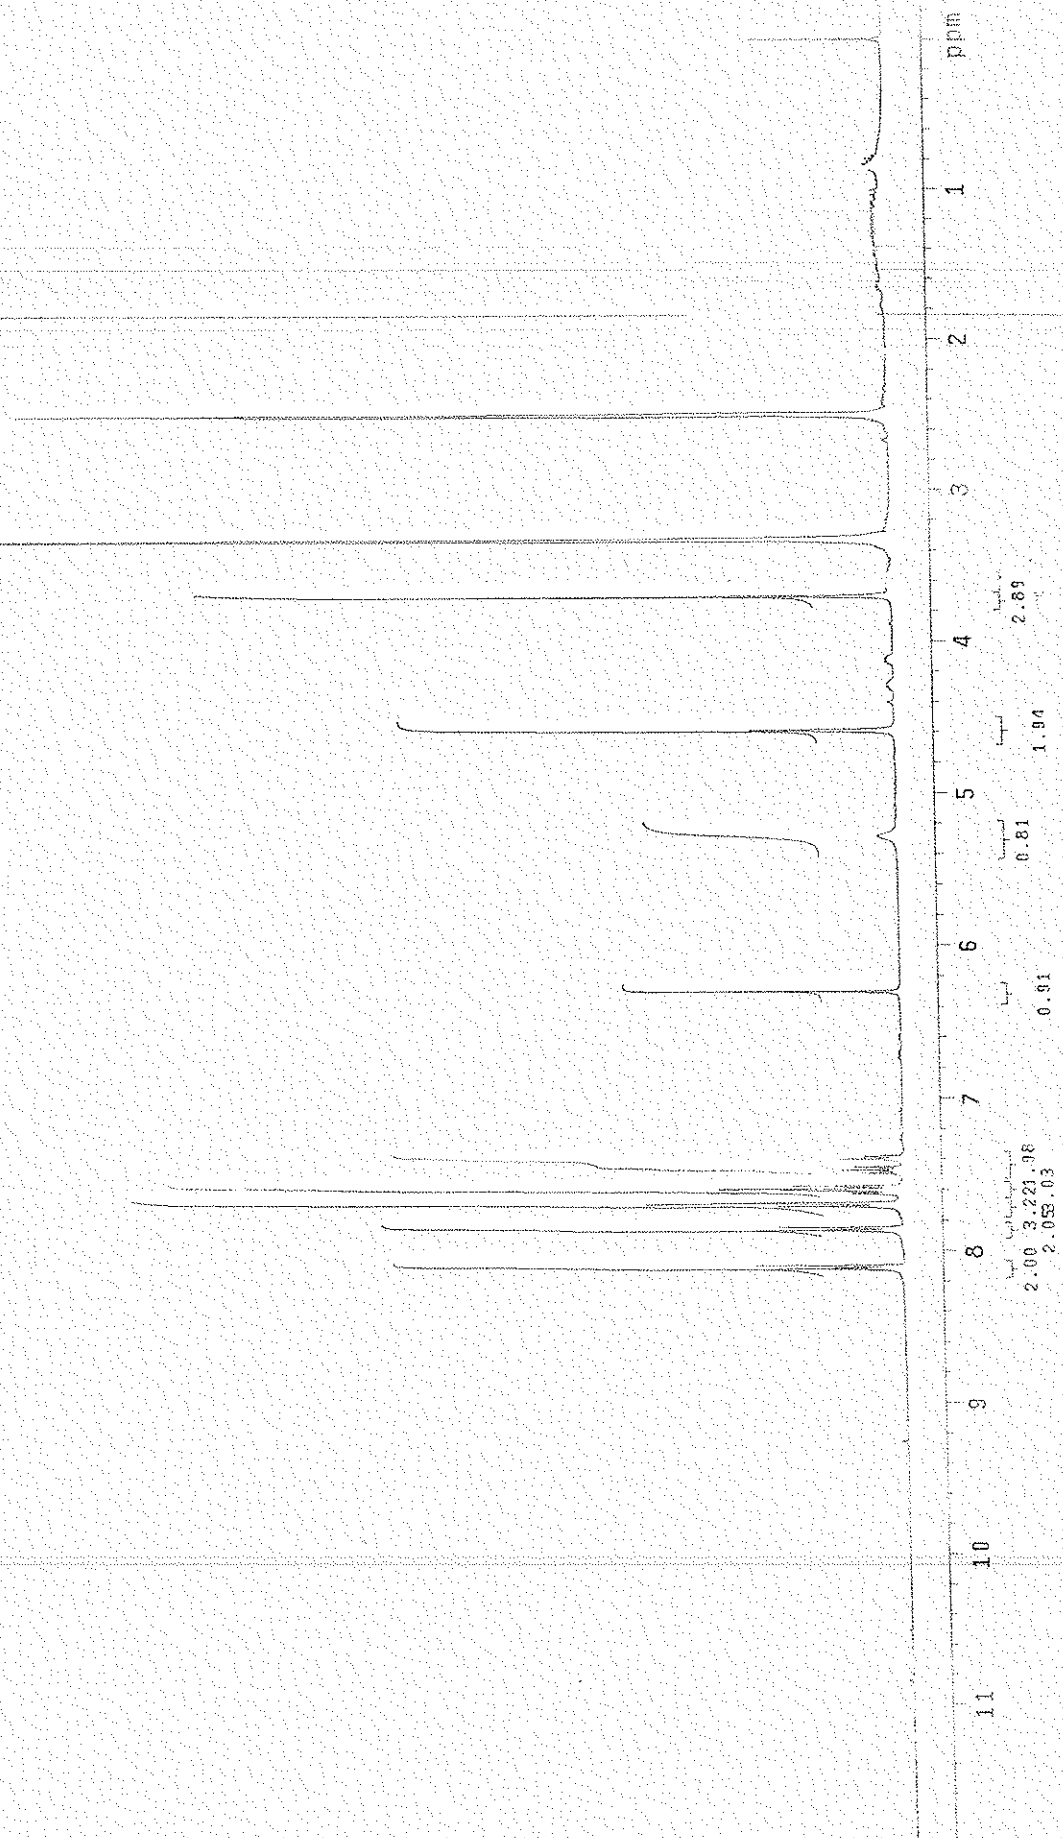



TDC-213 BIMA-PHBA in DMSO  
NMR-400  
AR.No:ME0211/1397  
Analyst:Haribabu.R  
Date: 11 th Feb. 2011

Sample Name:  
1397-TDC-213\_BIMA-PHBA  
Data Collected on:  
mercuryj-mercury400  
Archive directory:  
/home/sms50/routine/Feb2011/d\_11  
Sample directory:  
1397-TDC-213\_BIMA-PHBA\_20110212\_01  
FidFile: 1397-TDC-213\_BIMA-PHBA\_20110212\_01

Pulse Sequence: CARBON (s2pul)  
Solvent: dmso  
Data collected on: Feb 12 2011

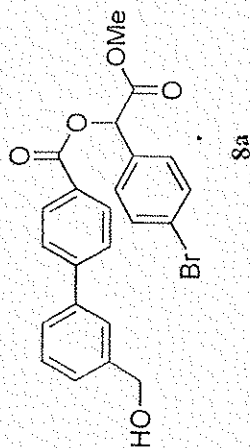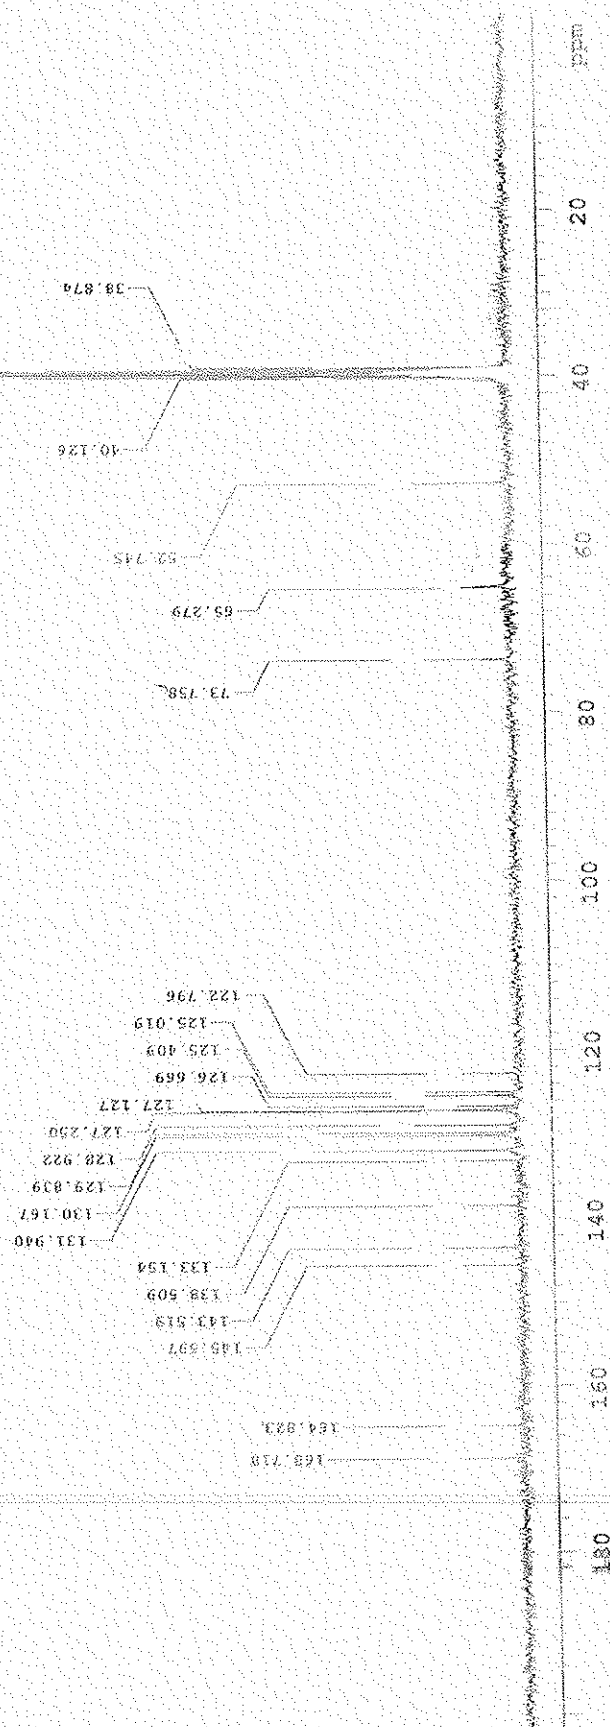

Filename: 1397-TDC-213\_BIMA-PHBA\_20110212\_01\_plot01

02-Mar-2011  
Lakshmikanth  
1: TOF MS ES-  
1.10e3

Aurigene Discovery Technologies, Hyderabad

BIMA/PHBA CYLD

UT0311\_019A 9 (0.163) Cm (9:11-87.94x0.010)  
238.8957

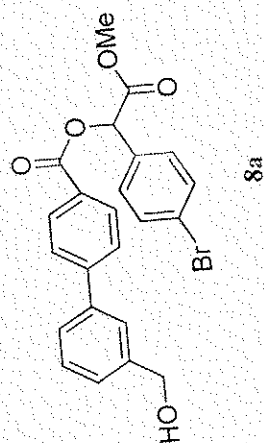

BIMA/PHBA CYLD  
Date: 02.MAR. 2011  
A.R.No.UT0311/019  
Lakshmikanth

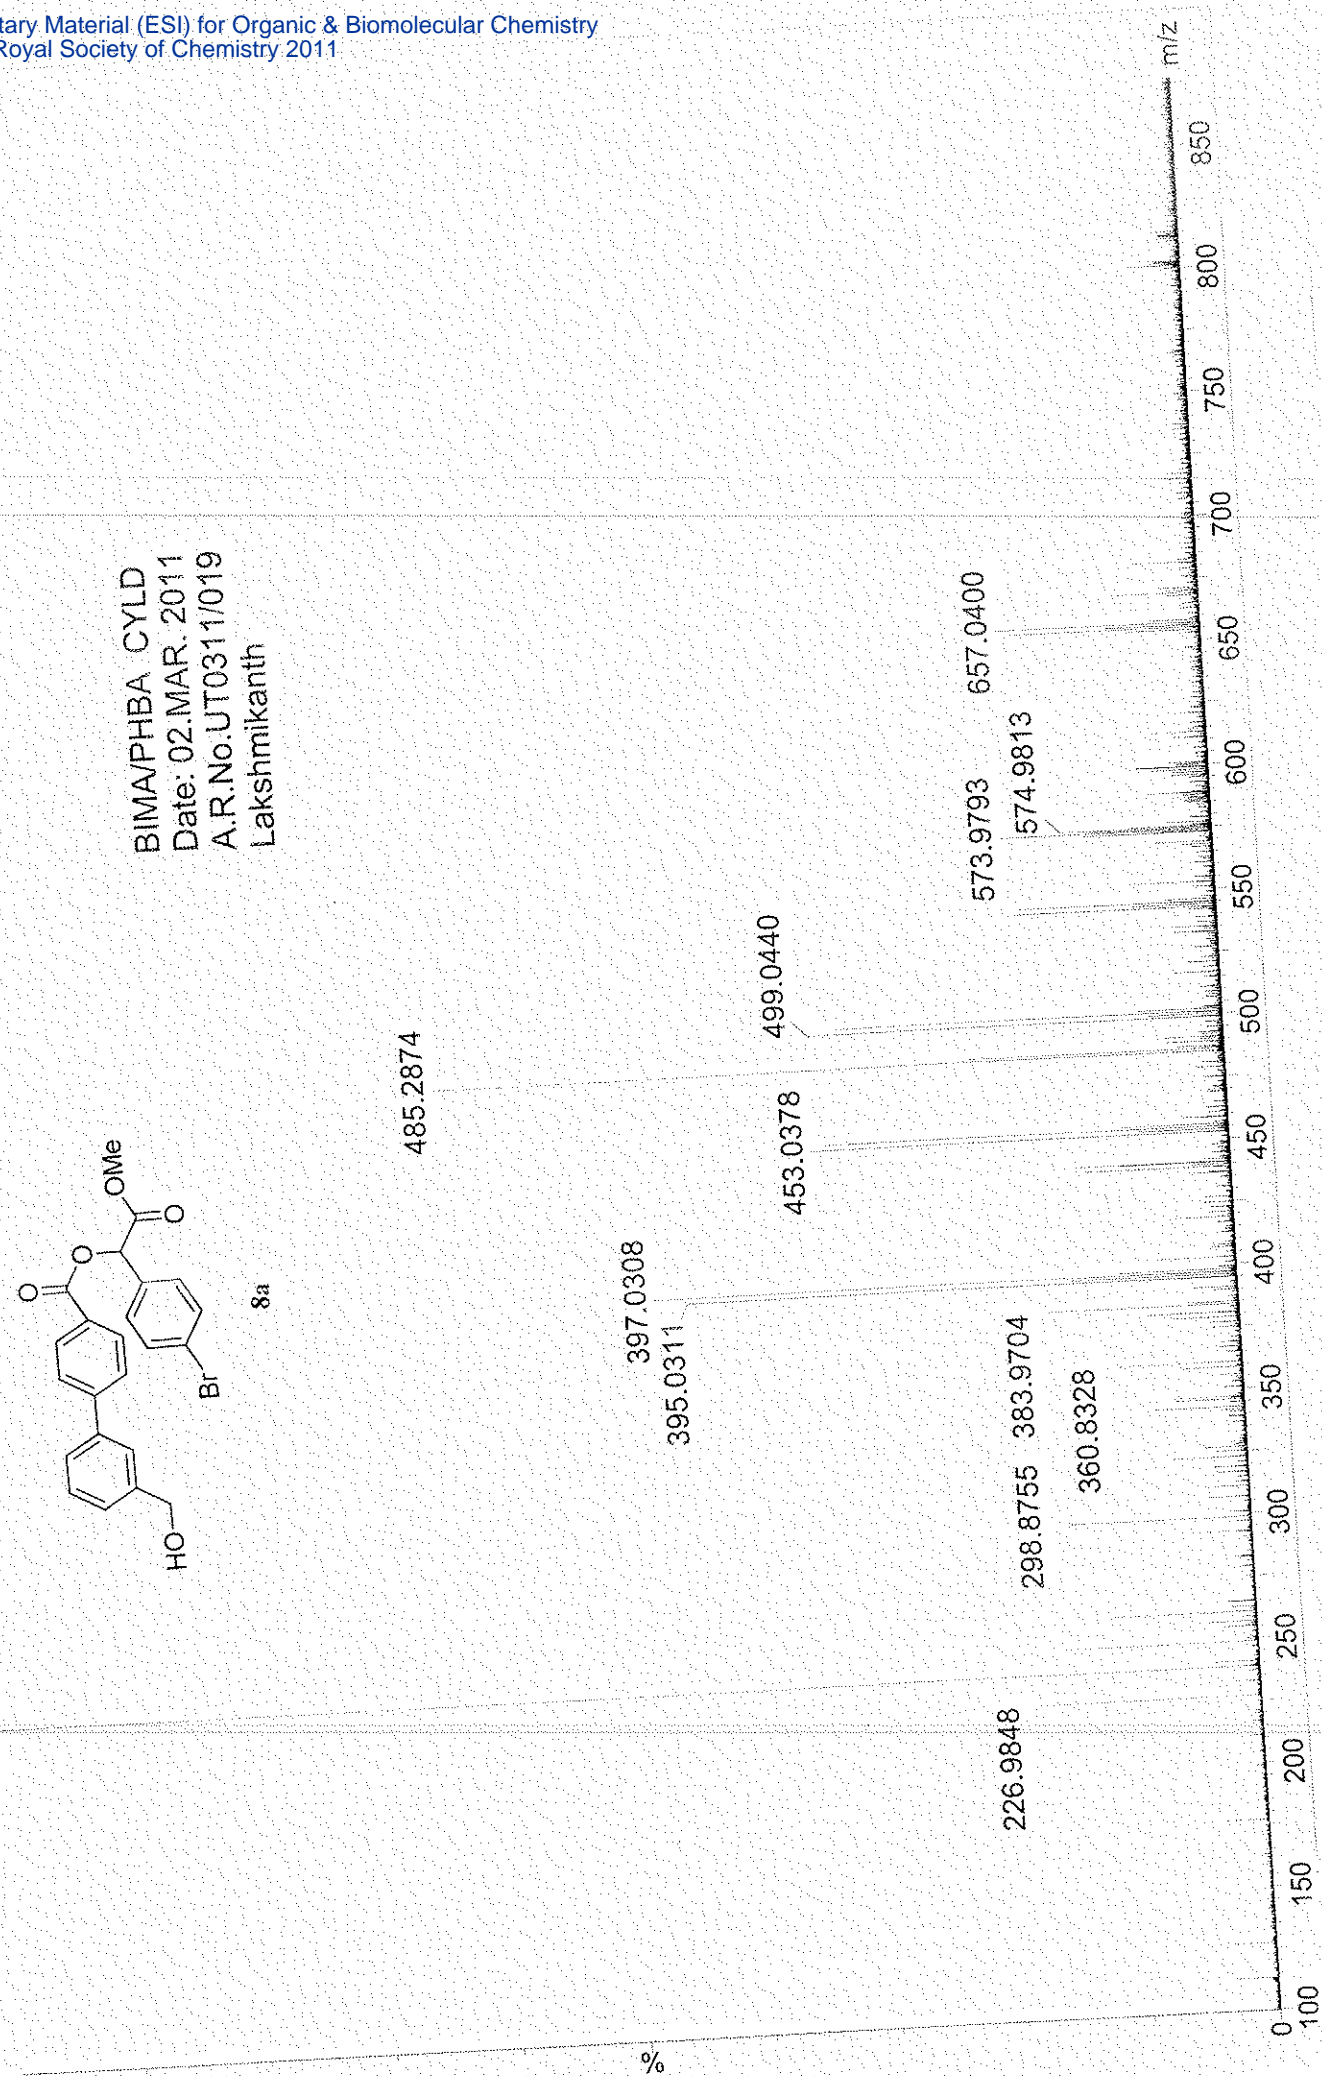

Elemental Composition Report

Single Mass Analysis

Tolerance = 10.0 PPM / DBE: min = -1.0, max = 15.0  
Element prediction: Off  
Number of isotope peaks used for i-FIT = 3

Monoisotopic Mass, Even Electron Ions  
14 formula(e) evaluated with 1 results within limits (up to 5 best isotopic matches for each mass)  
Elements Used:  
C: 0-26 H: 0-25 O: 0-7 Br: 0-1

BIMA/PHBA CYLD

Aurigene Discovery Technologies, Hyderabad

UT0311\_019A 9 (0.163) Cm (9:11-87:94X0.010)

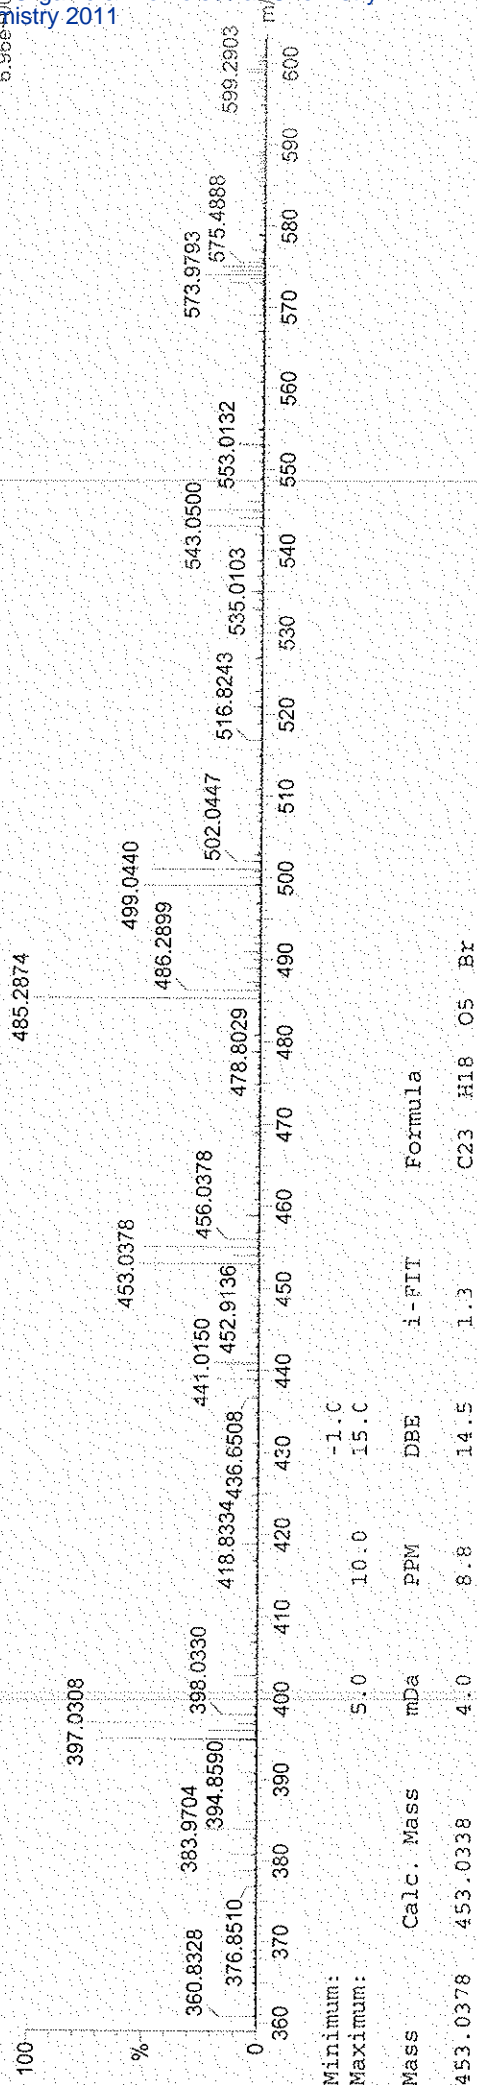

Minimum: -1.0  
Maximum: 15.0

| Mass     | Calc. Mass | mDa | PPM | DBE  | i-FIT | Formula       |
|----------|------------|-----|-----|------|-------|---------------|
| 453.0378 | 453.0338   | 4.0 | 8.8 | 14.5 | 1.3   | C23 H18 O5 Br |

Canavan

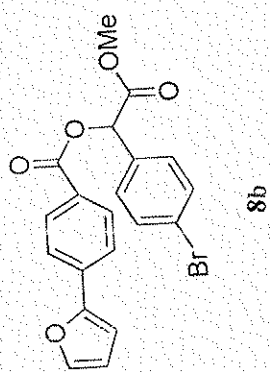

in DMSO

TDC-213 BIMA-FBA  
NMR-600  
AR No: RE0111/2255  
Analyst: Ganesh  
Date: 25th Jan, 2011

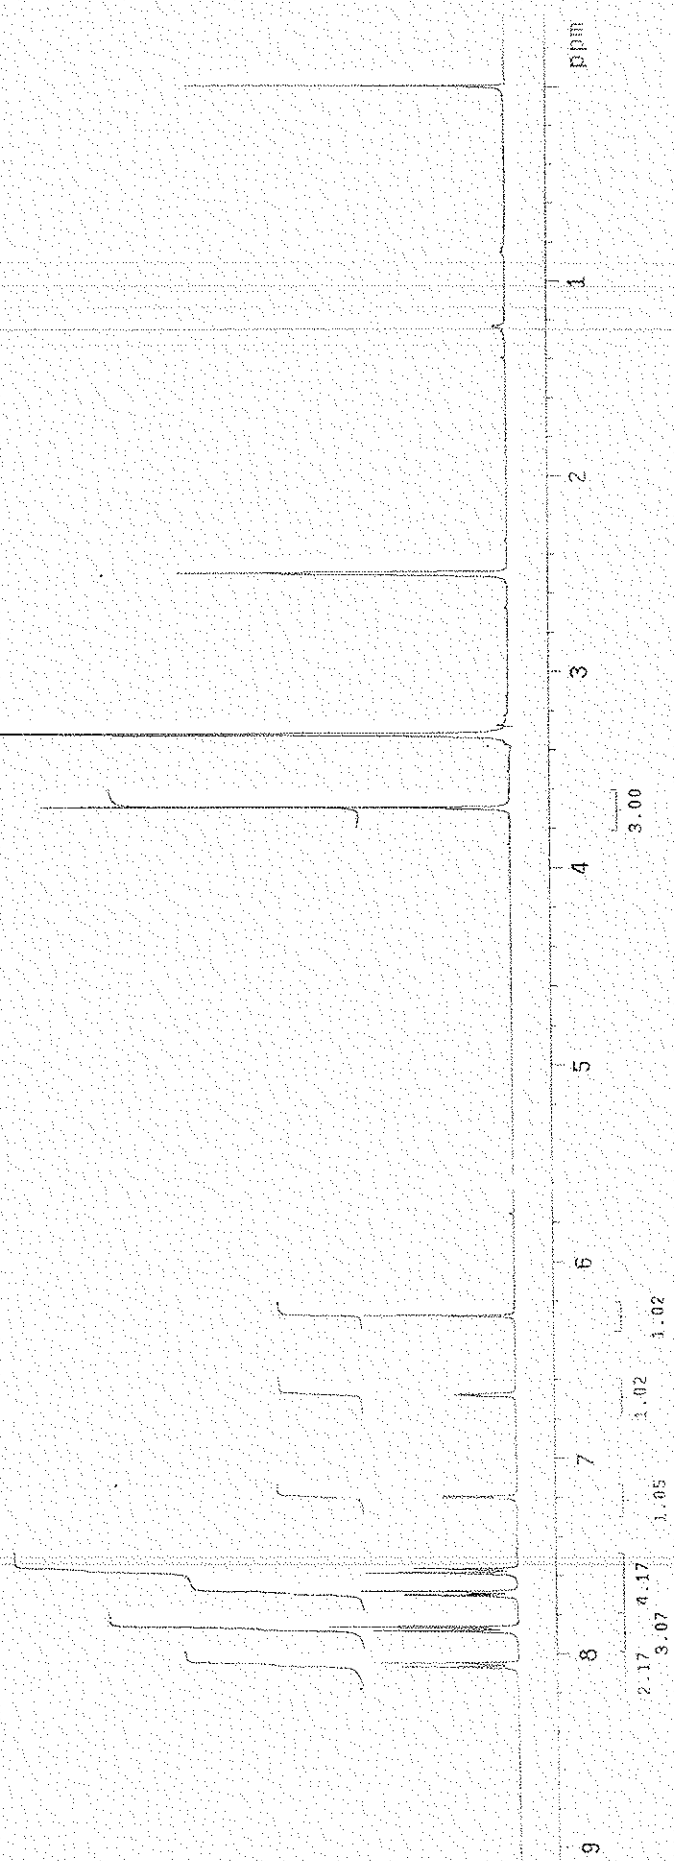



VARIAN

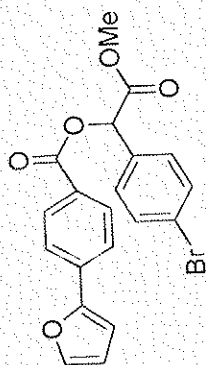

8b

TDC-213 BIMA-FBA In DMSO

NMR-400

AR.No:ME0211/1396

Analyst:Haribabu.R

Date: 11 th Feb. 2011

Sample Name:

1396-TDC-213\_BIMA-FBA

Data Collected on:

mercuryj-mercury400

Archive directory:

/home/sms50/routine/Feb2011/d\_11

Sample directory:

1396-TDC-213\_BIMA-FBA\_20110211\_01

FidFile: 1396-TDC-213\_BIMA-FBA\_20110212\_01

Pulse Sequence: CARBON (s2pul)

Solvent: dmso

Data collected on: Feb 12 2011

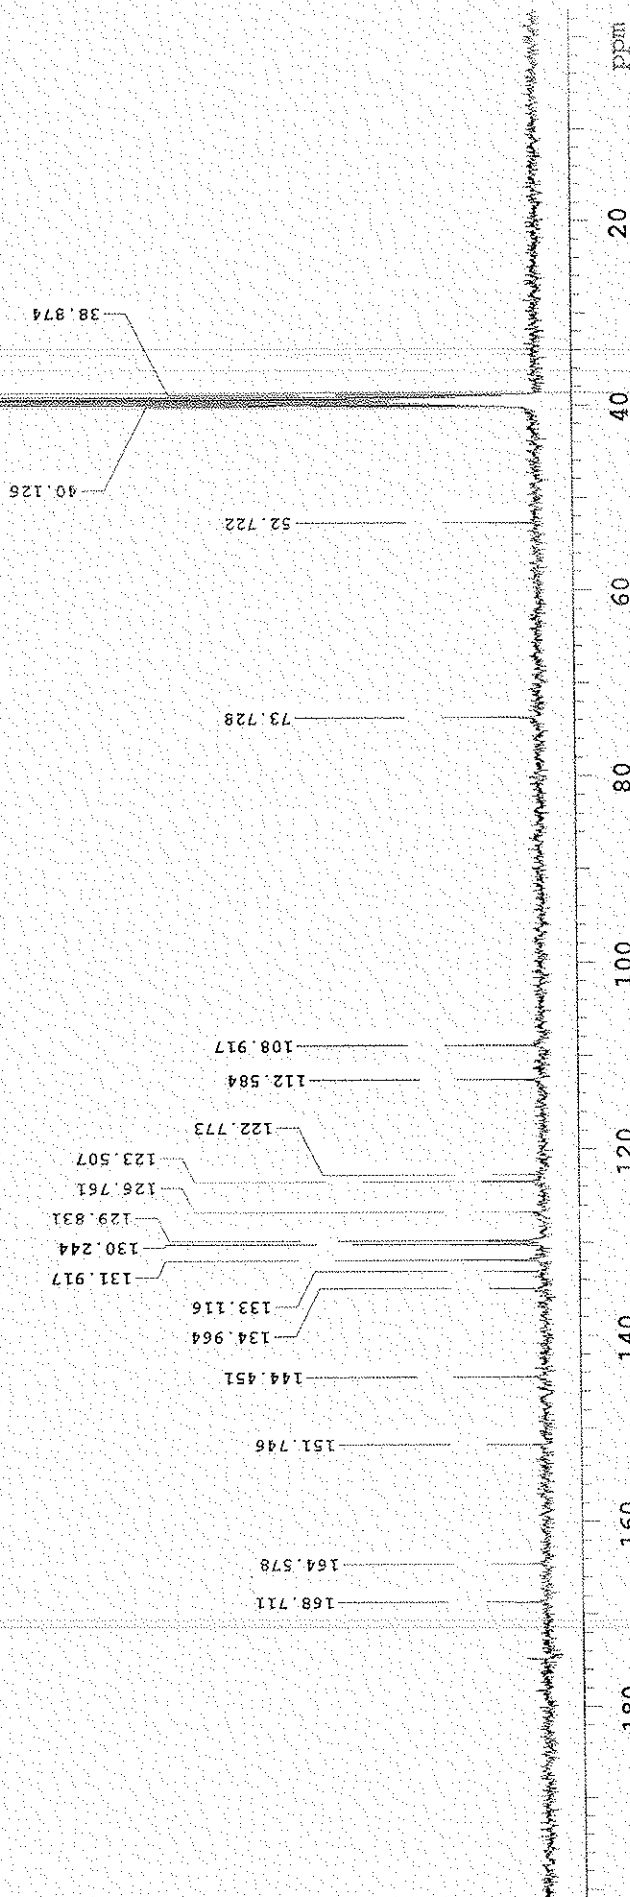

Plotname: 1396-TDC-213\_BIMA-FBA\_20110212\_01\_plot01

**BIMA/FBA CYLD**

Aurigene Discovery Technologies, Hyderabad

UT0311\_021 5 (0.103) Cm (5:20-87:93x0.010)  
130.1596

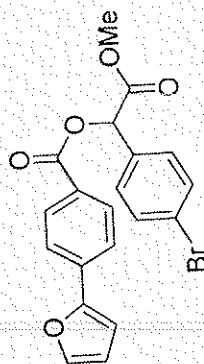

**8b**

BIMA/FBA CYLD  
Date: 02.MAR. 2011  
A.R.No.UT0311/021  
Lakshmikanth

373.3036

417.0158

418.0192

171.1856

%

m/z

02-Mar-2011  
Lakshmikanth  
1: TOF MS ES+  
4.99e6

Elemental Composition Report

Single Mass Analysis

Tolerance = 5.0 PPM / DBE: min = -1.0, max = 15.0  
Element prediction: Off  
Number of isotope peaks used for i-FIT = 3

Monoisotopic Mass, Even Electron Ions  
25 formula(e) evaluated with 1 results within limits (up to 5 best isotopic matches for each mass)  
Elements Used:  
C: 0-26 H: 0-25 O: 0-7 Br: 0-1

BIMA/FBA CYLD

UT0311\_0215 (0.103) Cm (5.20-87.93x0.010)

Aurigene Discovery Technologies, Hyderabad

02-Mar-2011  
Lakshmi  
1. TOF MS  
4.78e-10

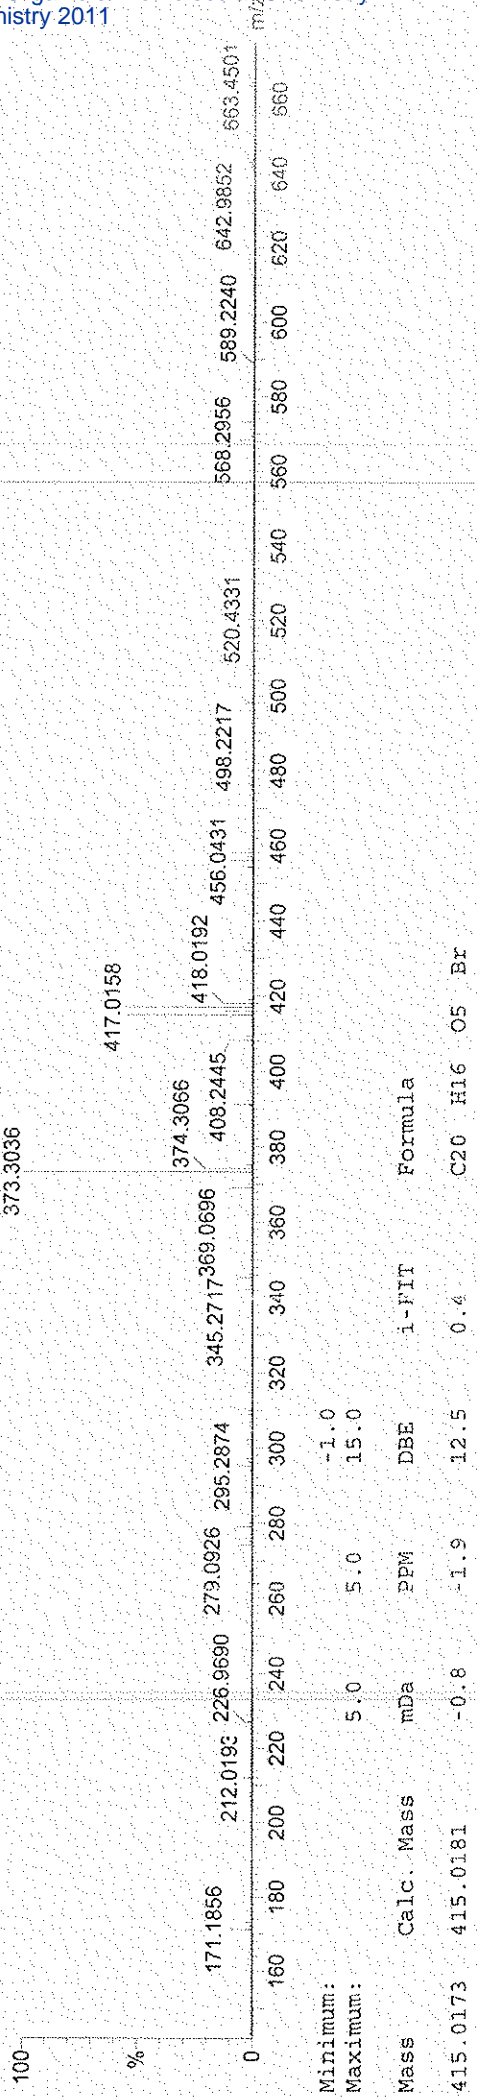

Minimum: -1.0  
Maximum: 15.0

| Mass     | Calc. Mass | mDa  | PPM  | DBE  | i-FIT | Formula       |
|----------|------------|------|------|------|-------|---------------|
| 415.0173 | 415.0181   | -0.8 | -1.9 | 12.5 | 0.4   | C20 H16 O5 Br |

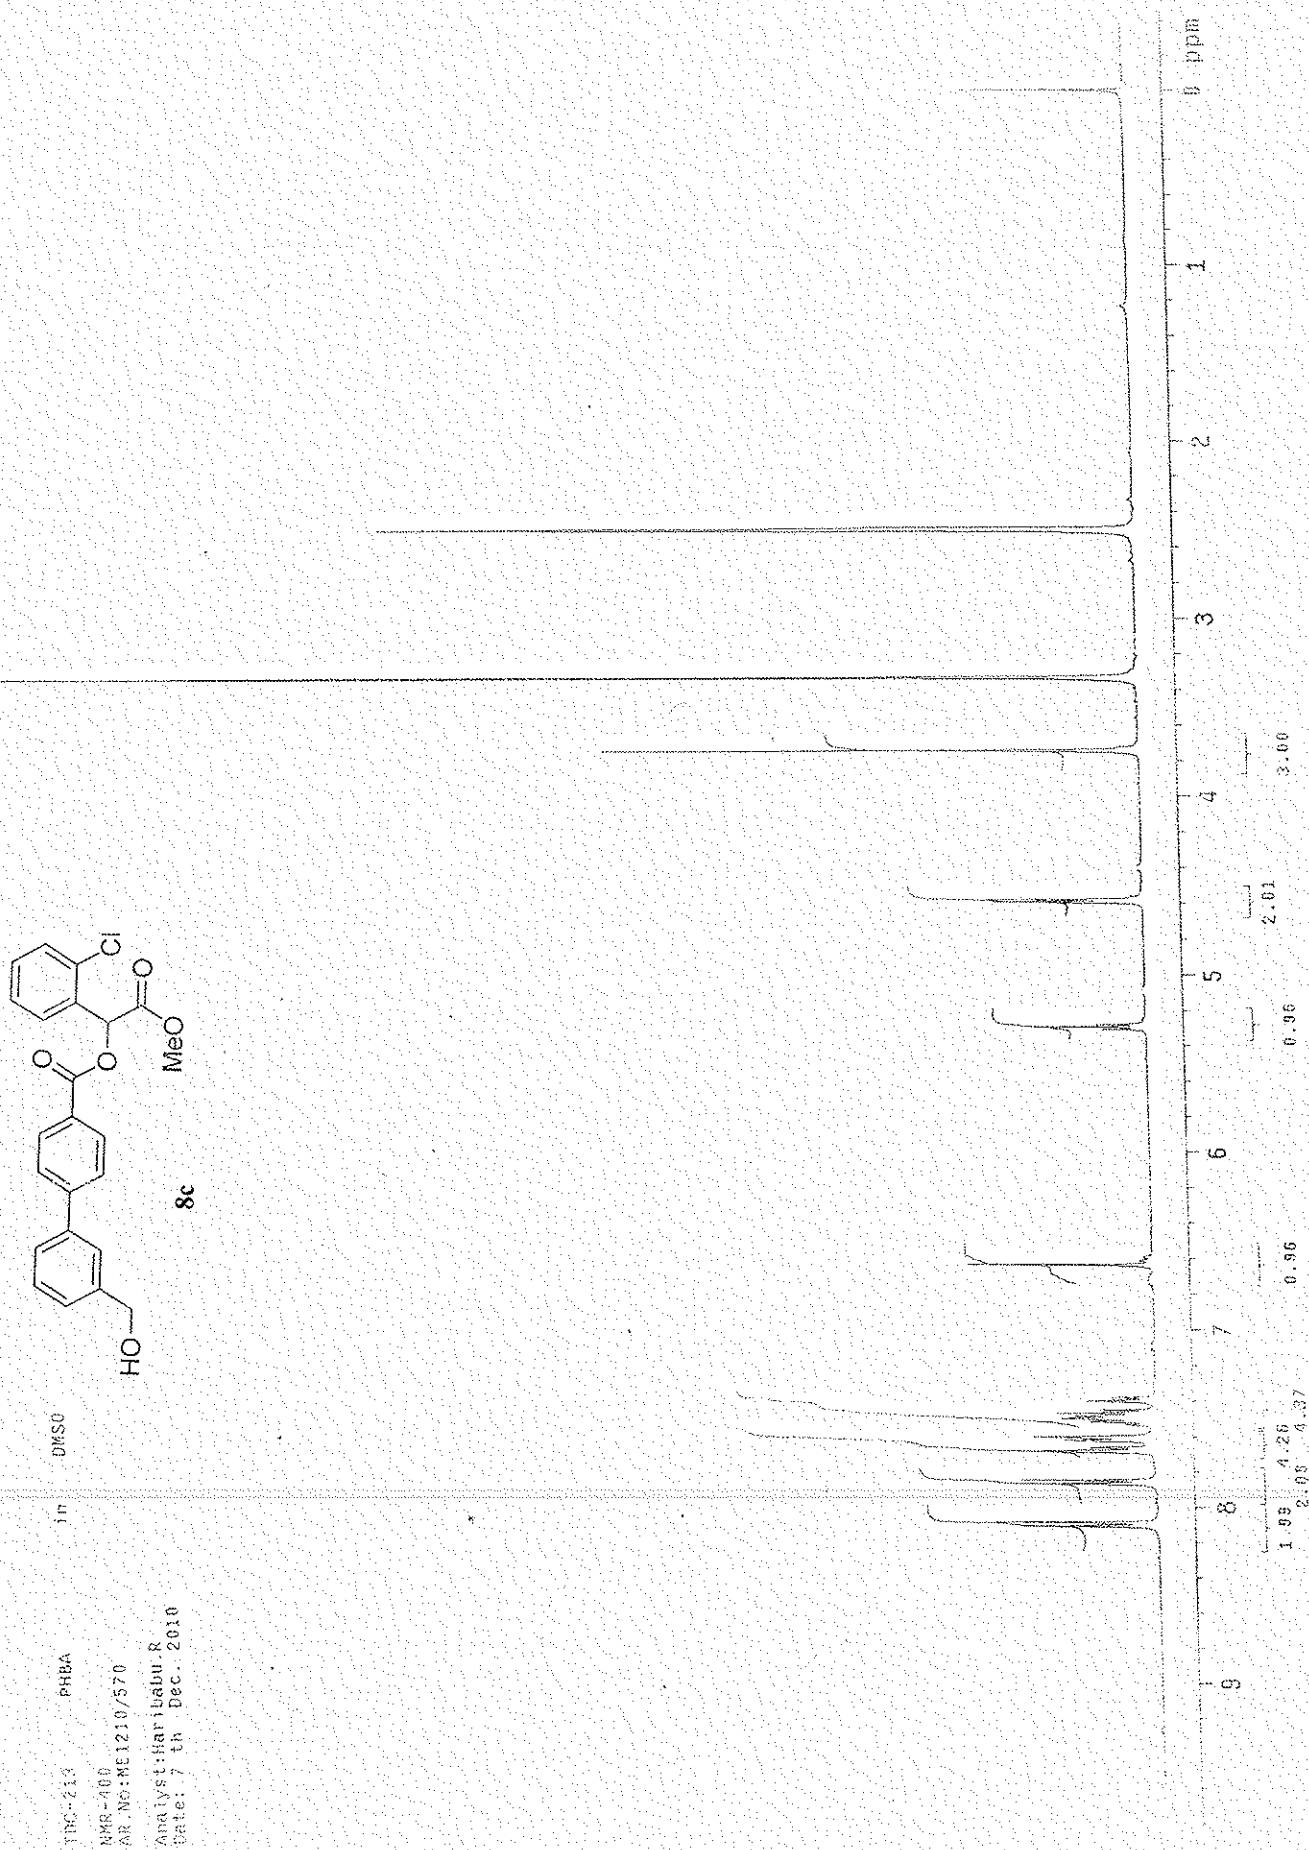



VARIAN

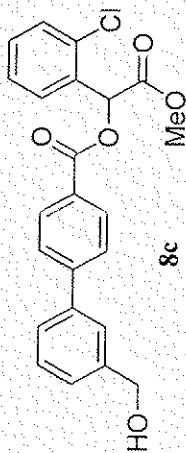

TDC-213 PHEA in DMSO

NMR-400

AR.No:ME1110/1510

Analyst:Haribabu.R

Date: 19 th Nov 2010

Sample Name:

1510-TDC-213\_PHEA

Data Collected on:

mercuryj-mercury400

Archive directory:

/home/sms50/routine/Nov2010/d\_19

Sample directory:

1510-TDC-213\_PHEA\_20101120\_01

FidFile: 1510-TDC-213\_PHEA\_20101120\_02

Pulse Sequence: CARBON (s2pul)

Solvent: dmsd

Data collected on: Nov 20 2010

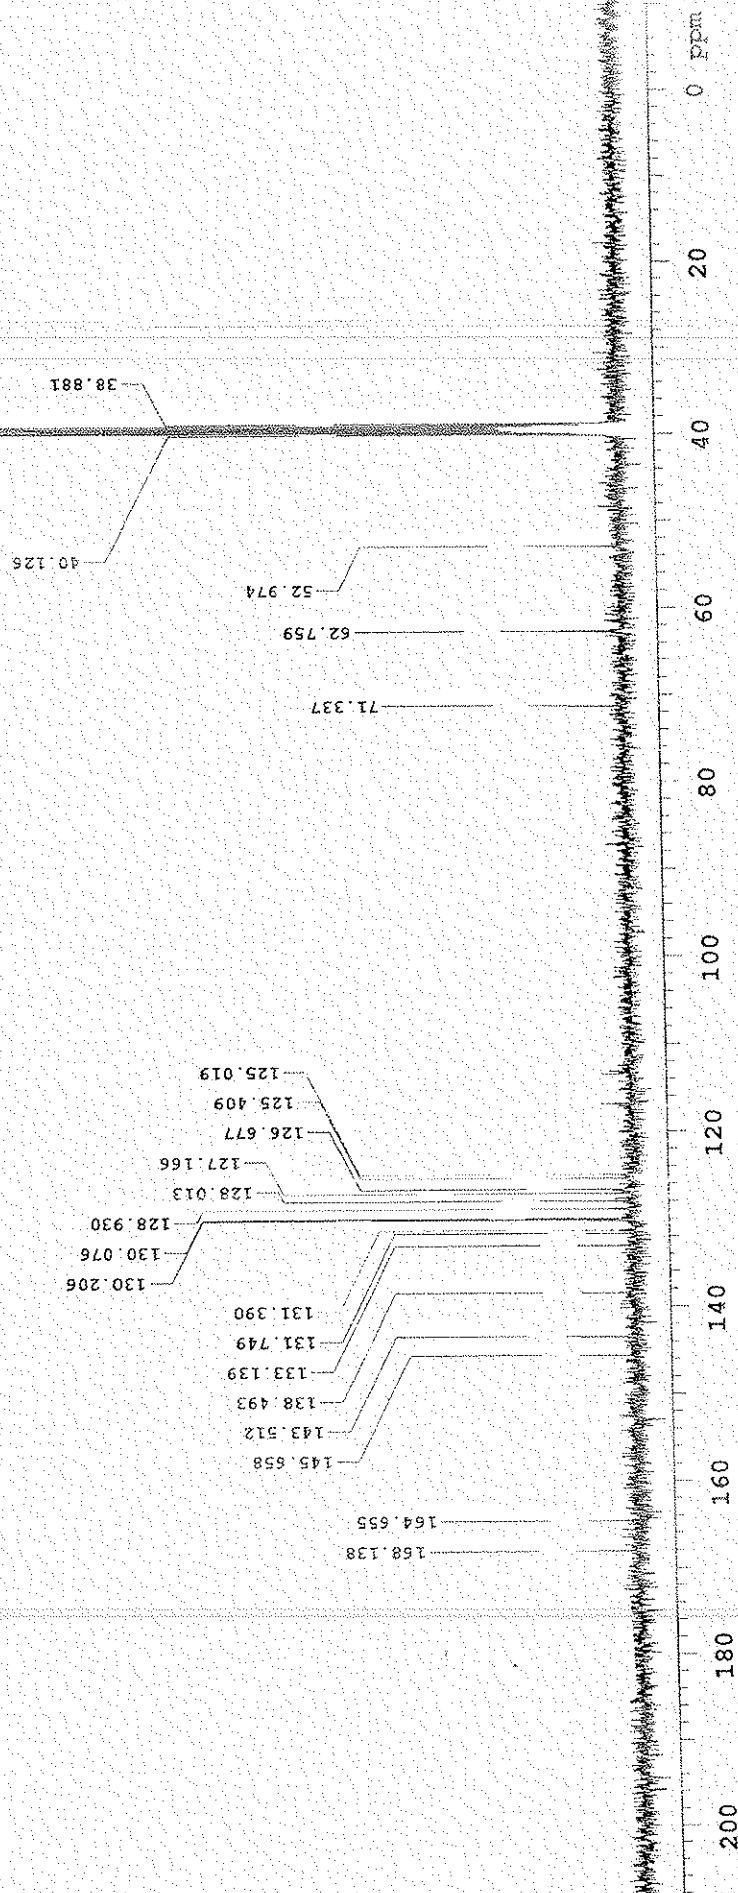

Plotname: 1510-TDC-213\_PHEA\_20101120\_02\_Plot01

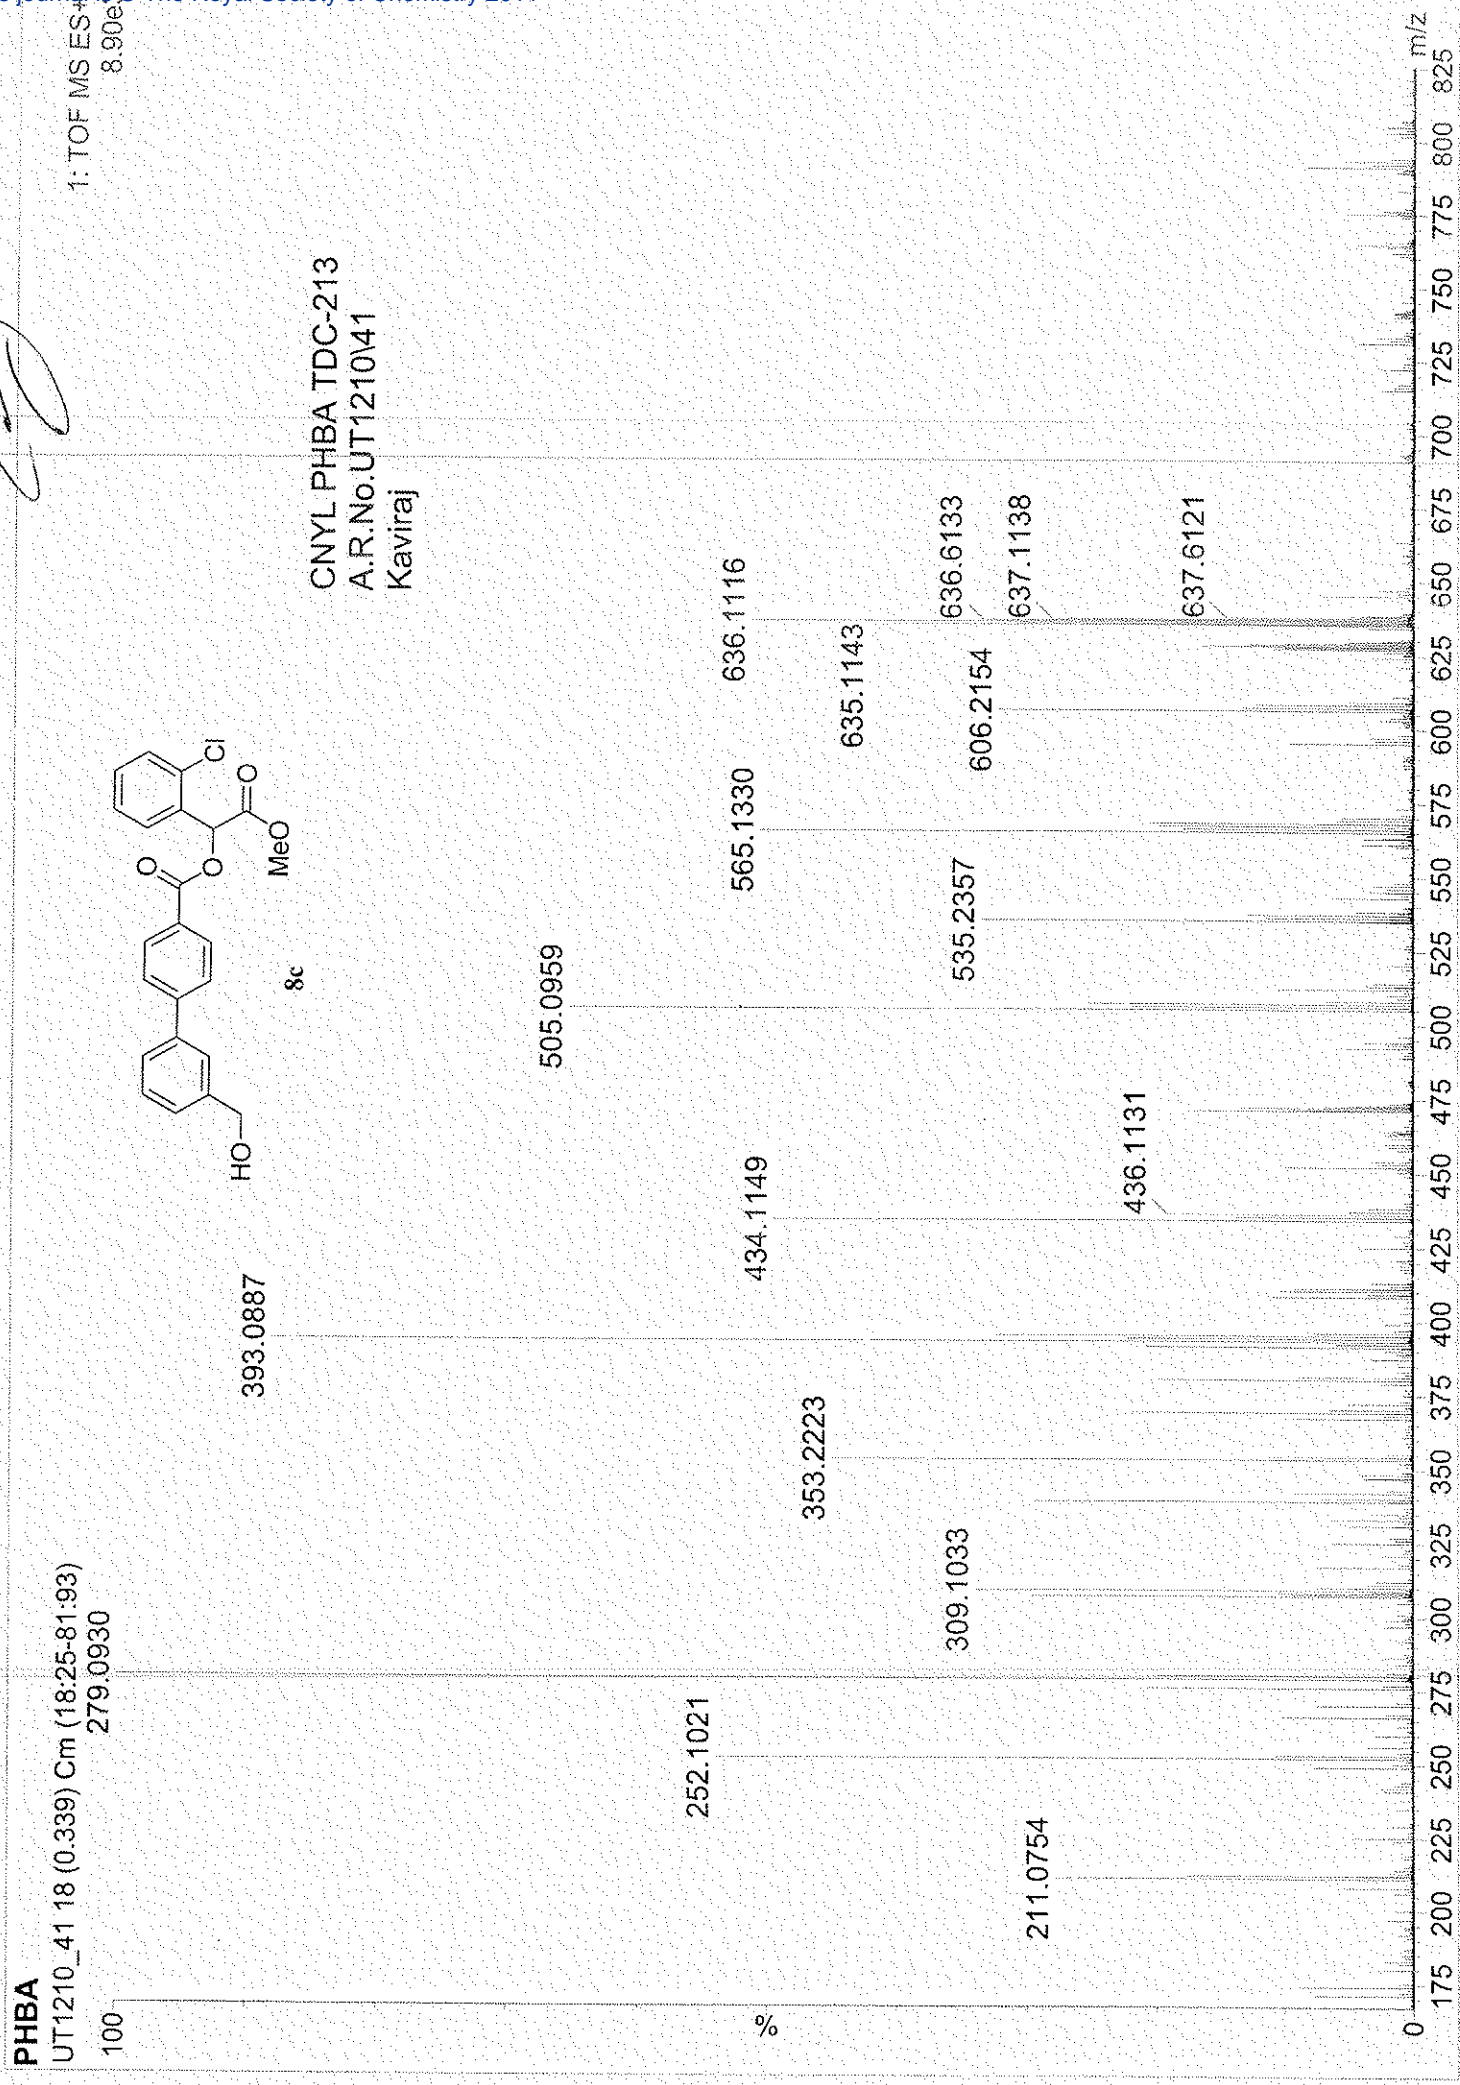

CNYL PHBA TDC-213  
A.R.No.UT1210\41  
Kaviraj

## Single Mass Analysis

Element prediction: Off

Number of isotope peaks used for i-FIT = 3

## Monoisotopic Mass, Even Electron Ions

84 formula(e) evaluated with 2 results within limits (up to 4 best isotopic matches for each mass)

Elements Used:

C: 0-40 H: 0-55 O: 0-8 Cl: 0-1

PIBA

UT1210\_41 18 (0.339) Cm (18:25-81:93)

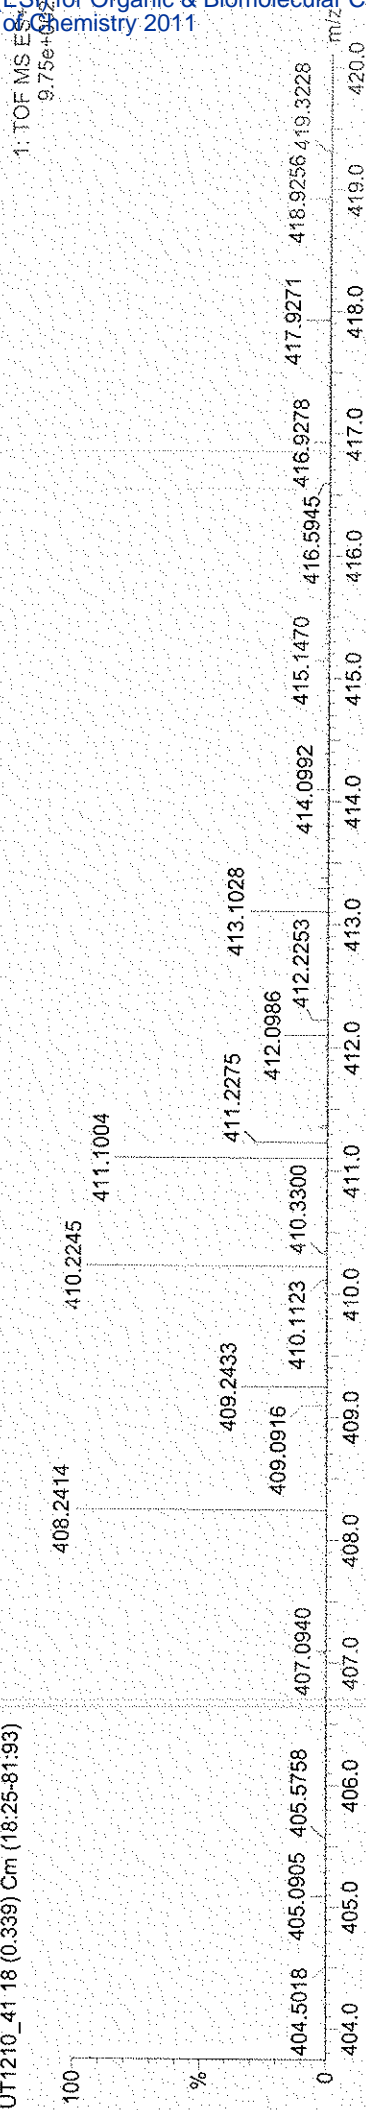

| Minimum: |            |      |      |      |       |            |    |  |  |  |
|----------|------------|------|------|------|-------|------------|----|--|--|--|
| Maximum: |            |      |      |      |       |            |    |  |  |  |
| Mass     | Calc. Mass | mDa  | PPM  | DBE  | i-FIT | Formula    |    |  |  |  |
| 411.1004 | 411.0999   | 0.5  | 1.2  | 13.5 | 6.9   | C23 H20 O5 | C1 |  |  |  |
|          | 411.1021   | -1.7 | -4.1 | 22.5 | 137.1 | C29 H15 O3 | O3 |  |  |  |

TDC-213\_FPBA in DMSO

NMS-400

AR No: ME1110/120

Analyst: Shruthi

Date: 2nd Nov 2010

Sample Name:

120\_TDC-213\_FPBA

Data Collected on:

mercuryj-mercury400

Archive directory:

/home/gms50/routine/Nov2010/d\_02

Sample directory:

120\_TDC-213\_FPBA\_20101102\_01

File: 120\_TDC-213\_FPBA\_20101102\_01

Pulse Sequence: PROTON (s2pul)

Solvent: dmsd

Data collected on: Nov 2 2010

VARIAN

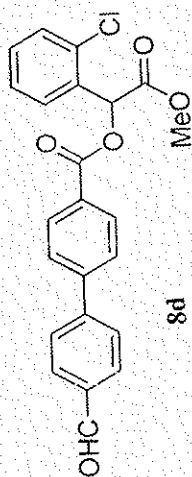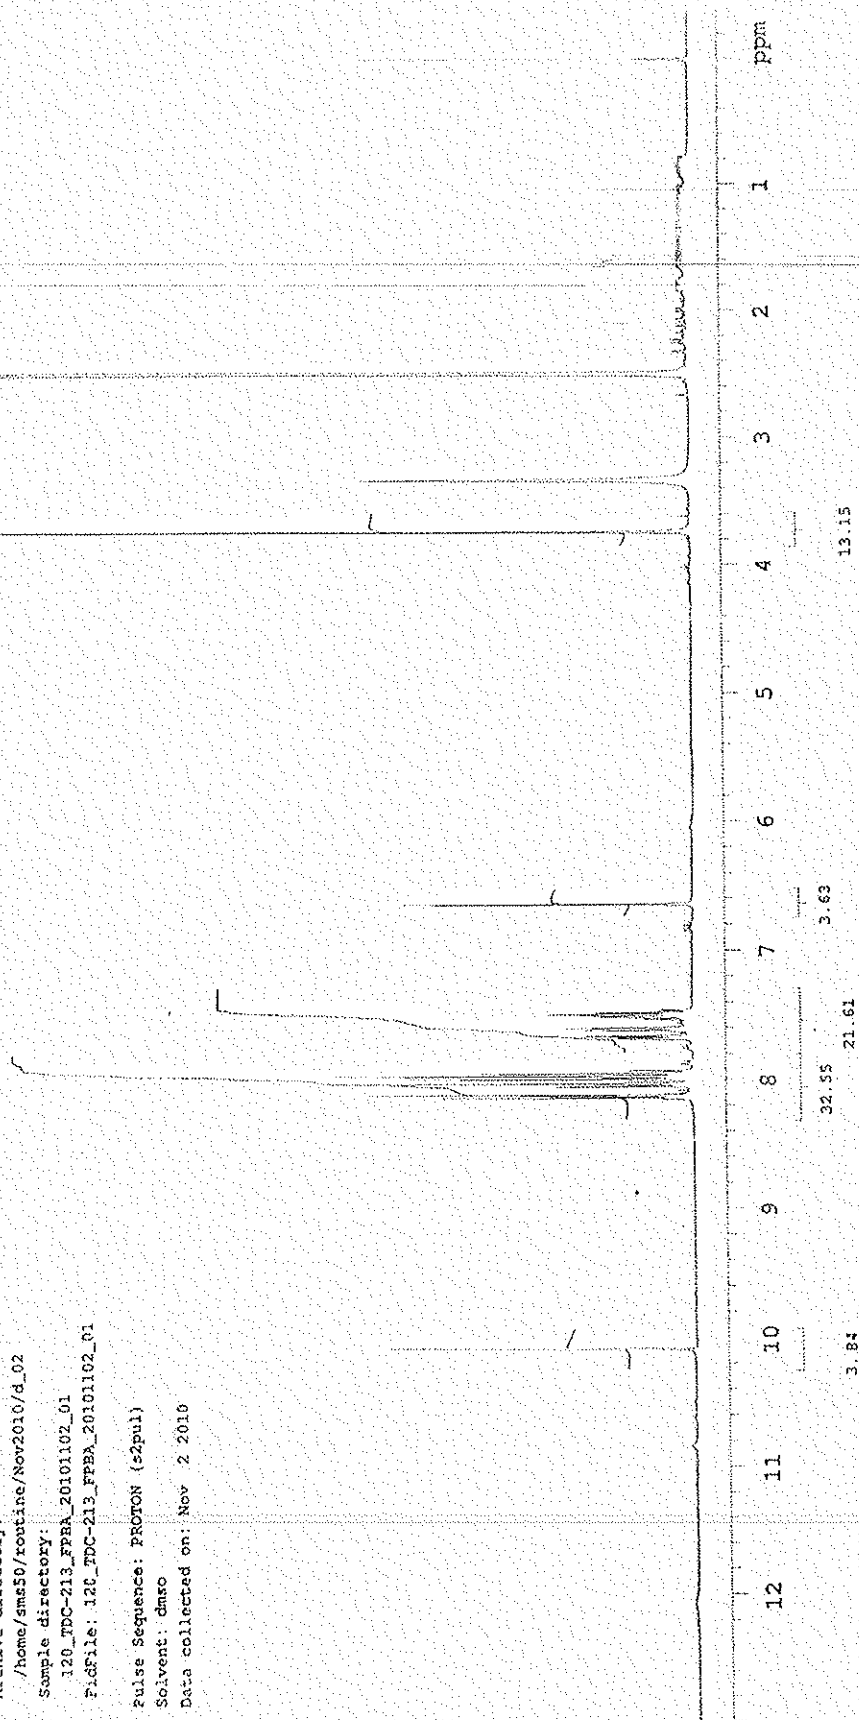

Plotname: 120\_TDC-213\_FPBA\_20101102\_01\_plot01



VARIAN

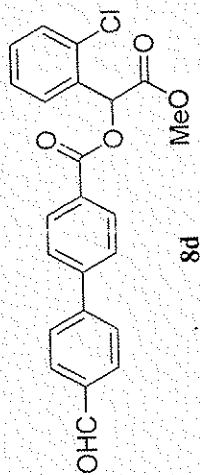

TDC-213 FPBA in DMSO

NMR-400

AR No: ME1110/1511

Analyst: Haribabu.R

Date: 19 th Nov 2010

Sample Name:

1511-TDC-213\_FPBA

Data Collected on:

mercuryj-mercury400

Archive directory:

/home/sms50/routine/Nov2010/d\_19

Sample directory:

1511-TDC-213\_FPBA\_20101120\_01

Fidfile: 1511-TDC-213\_FPBA\_20101120\_01

Pulse Sequence: CARBON (s2pul)

Solvent: dmsO

Data collected on: Nov 20 2010

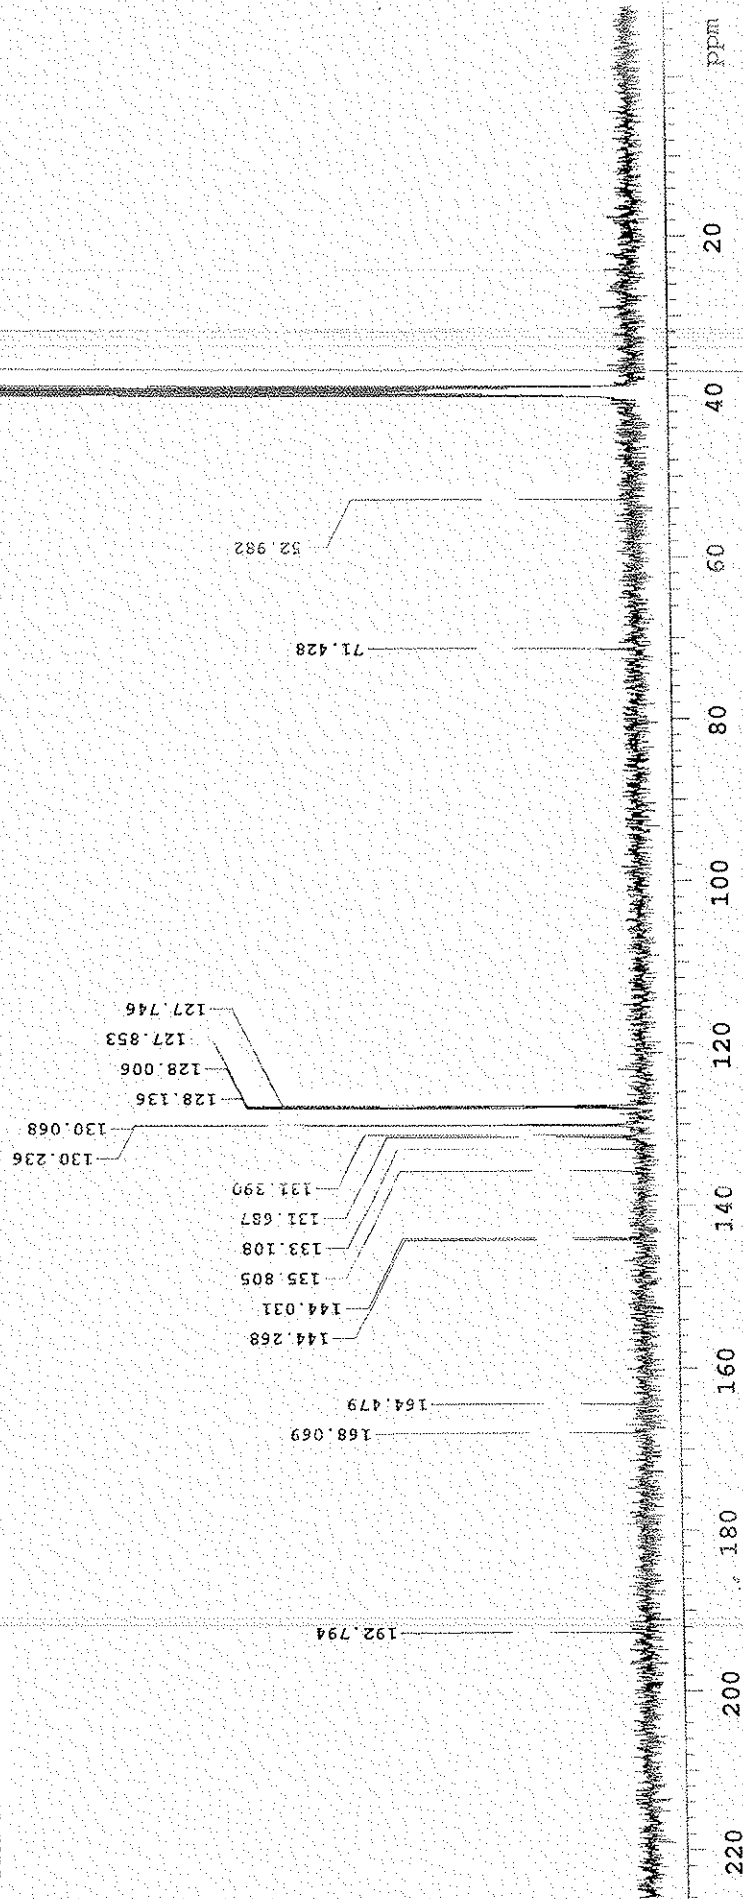

Plotname: 1511-TDC-213\_FPBA\_20101120\_01\_plot01

FPBA

UT1210\_42 17 (0.324) Cm (17:31-85:101)

279.0898

100

%

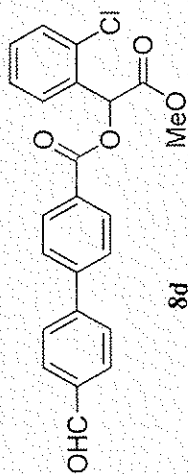

8d

MeO

Cl

CNYL FPBA TDC-213

A.R.No.UT1210142

Kaviraj

1: TOF MS ES+  
1.08e5

280.0928

380.2144

557.1808

0

m/z

200 225 250 275 300 325 350 375 400 425 450 475 500 525 550 575 600 625 650 675 700 725 750 775 800

# Elemental Composition Report

## Single Mass Analysis

Tolerance = 5.0 PPM / DBE: min = -1.0, max = 80.0  
Element prediction: Off  
Number of isotope peaks used for i-FIT = 3

Monoisotopic Mass, Even Electron Ions  
80 formula(e) evaluated with 1 results within limits (up to 4 best isotopic matches for each mass)

Elements Used:  
C: 0-40 H: 0-55 O: 0-8 Cl: 0-1  
FPBA  
UT1210\_42 17 (0.324) Cm (17:31-85:101)

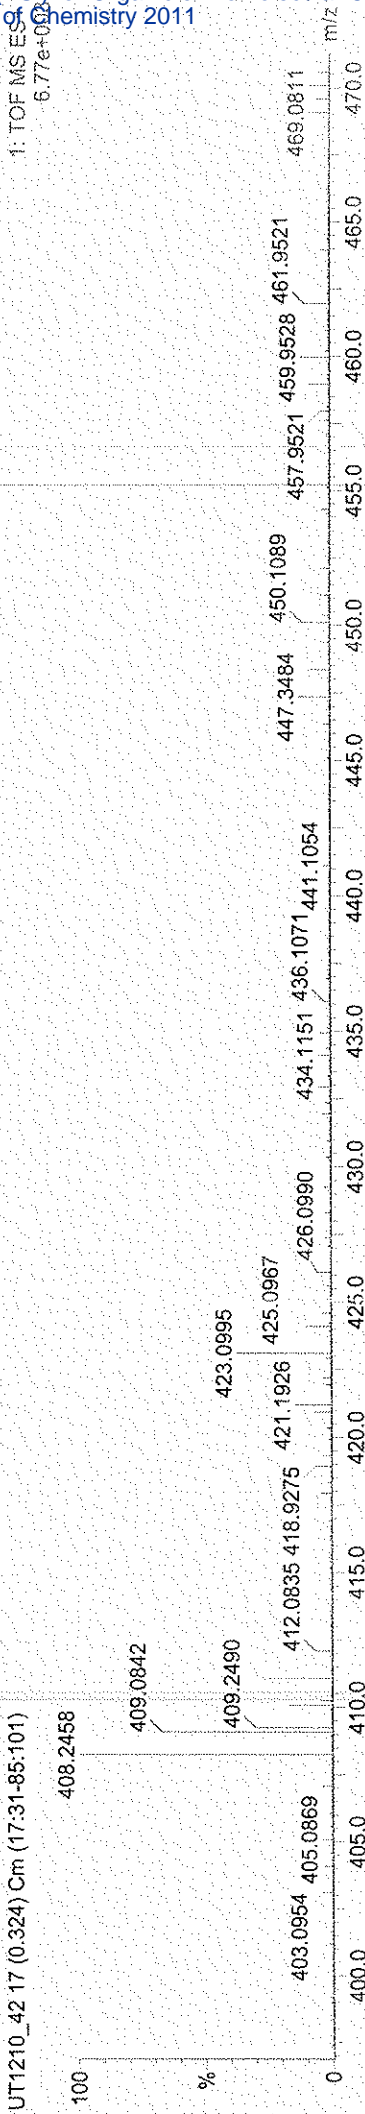

|          |            |               |
|----------|------------|---------------|
| Minimum: | 5.0        | -1.0          |
| Maximum: | 5.0        | 80.0          |
| Mass     | Calc. Mass | mDa           |
| 409.0842 | 409.0843   | -0.1          |
|          | PPM        | DBE           |
|          | -0.2       | 14.5          |
|          | i-FIT      | Formula       |
|          | 1.6        | C23 H18 O5 Cl |

VARIAN

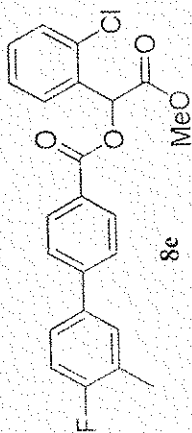

TDC-213 MEBA in DMSO

NMR-400

NR.No:MEB1110/302

Analyst: Haribabu.R

Date: 8th Nov 2010

Sample Name:

302-TDC-213\_MEBA

Data Collected on:

mercuryj-mexcury400

Archive directory:

/home/sms50/routine/Nov2010/d\_08

Sample directory:

302-TDC-213\_MEBA\_20101108\_01

Filefile: 302-TDC-213\_MEBA\_20101108\_01

Pulse Sequence: PROTON (zgpg2)

Solvent: DMSO

Data collected on: Nov 8 2010

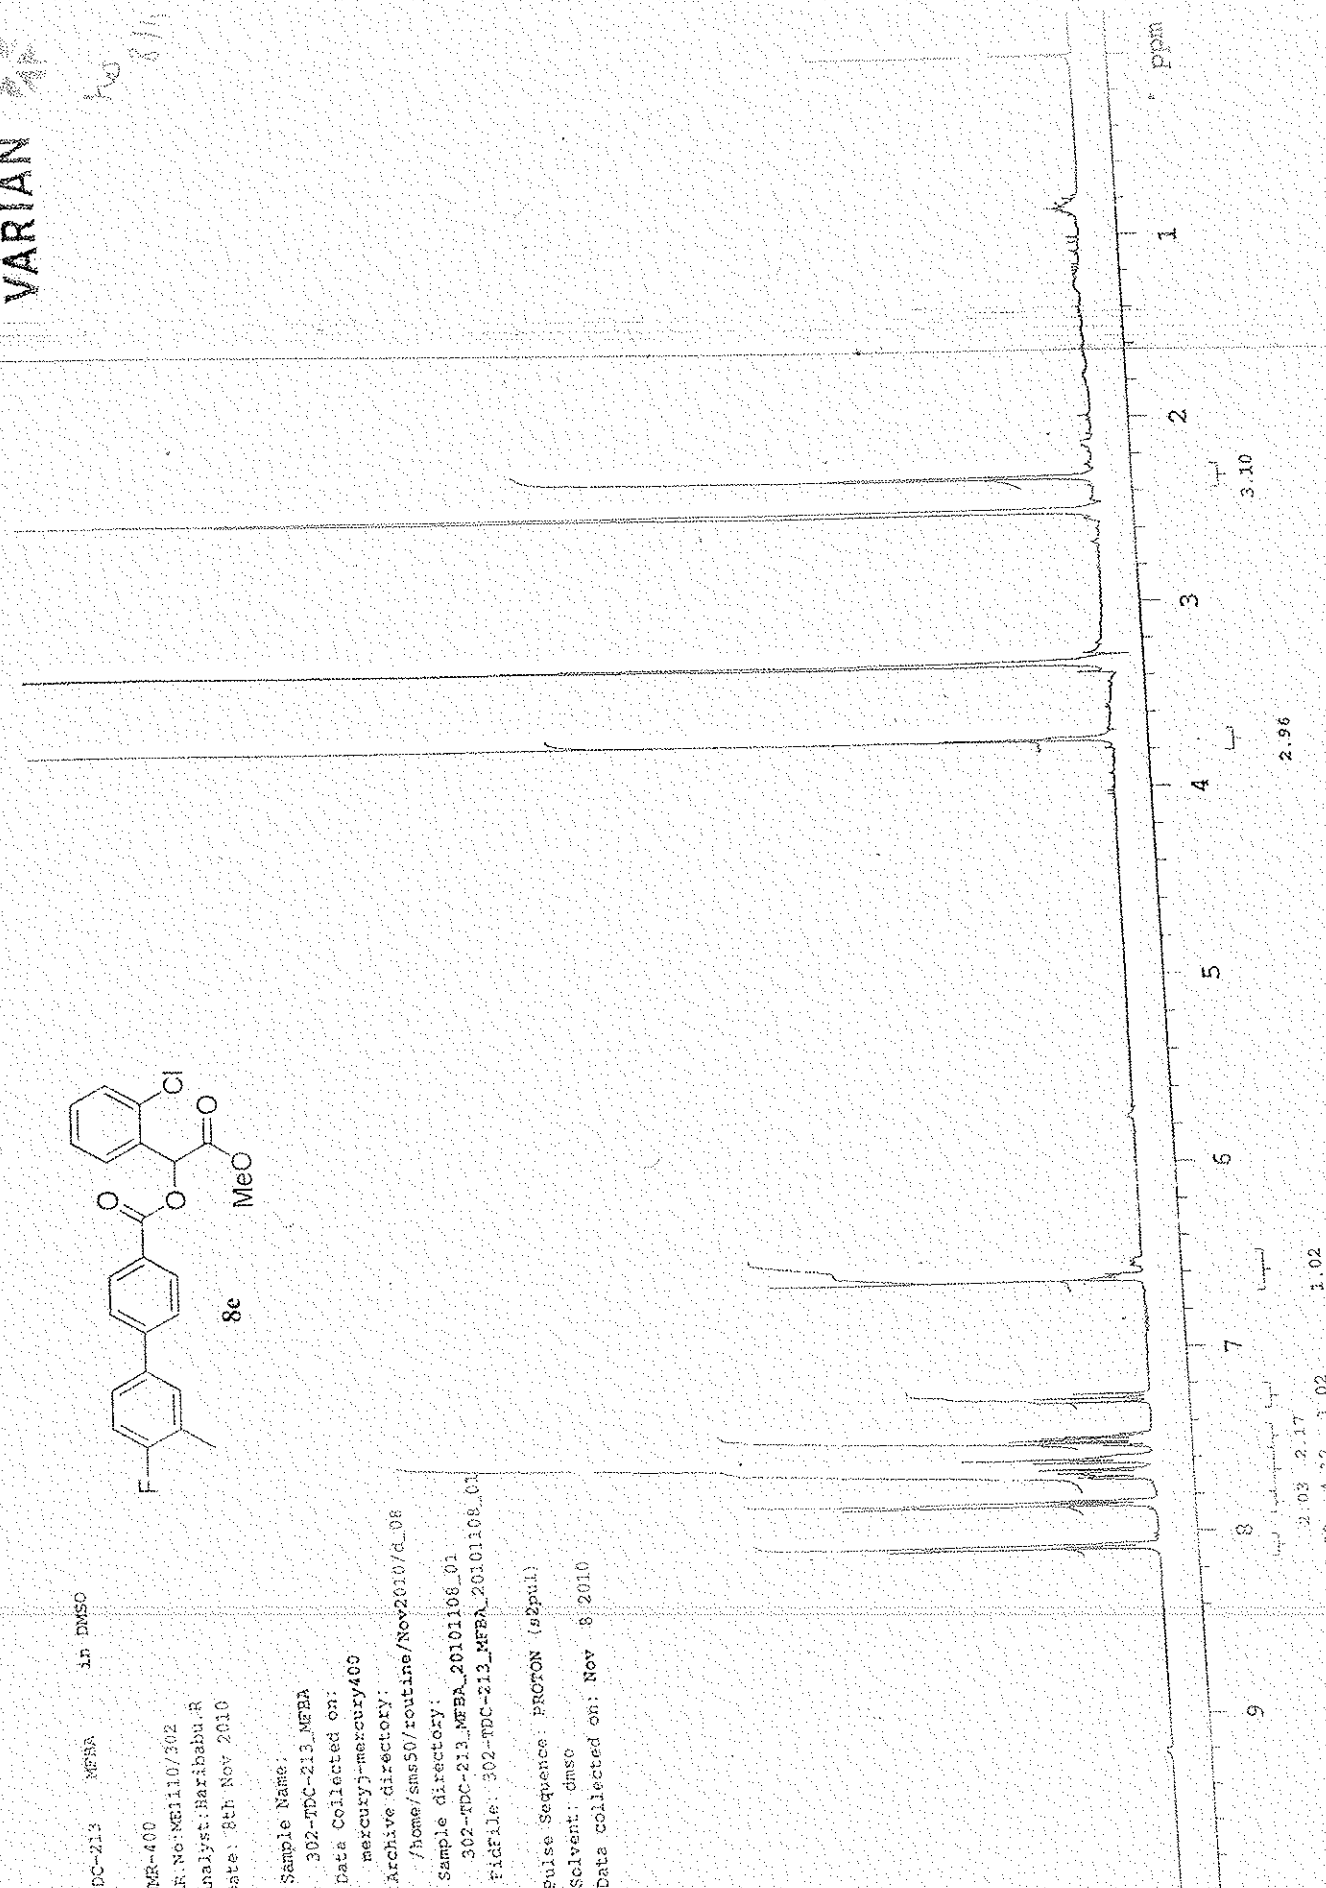

Plotname: 302-TDC-213\_MEBA\_20101108\_01\_Plot01



20412

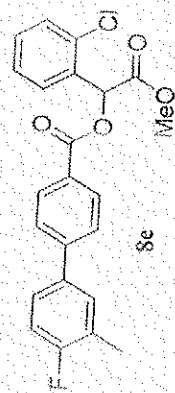

YDC-213 NMR in DMSO  
WVF-400  
AS.No: H1219/220  
Analyst: H1219/220  
Date: 3rd Dec. 2010  
AS.No: H1219/220  
Analyst: H1219/220  
Date: 3rd Dec. 2010

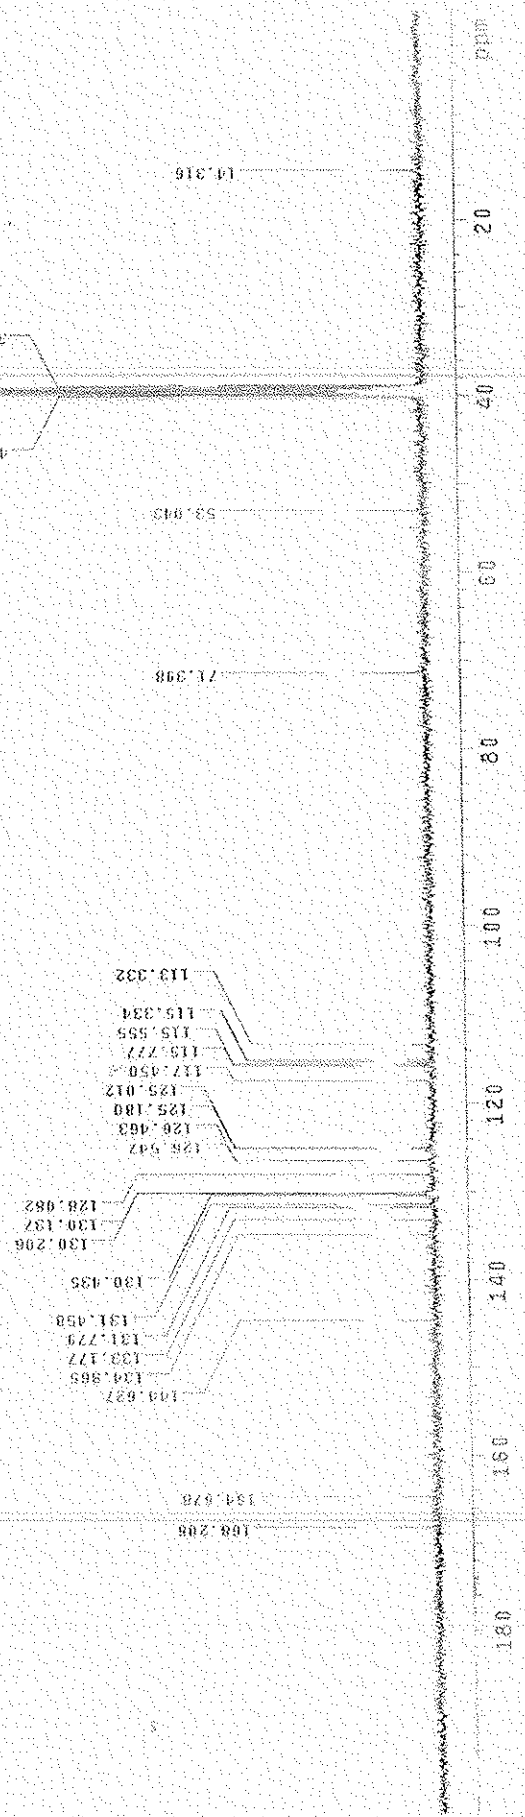

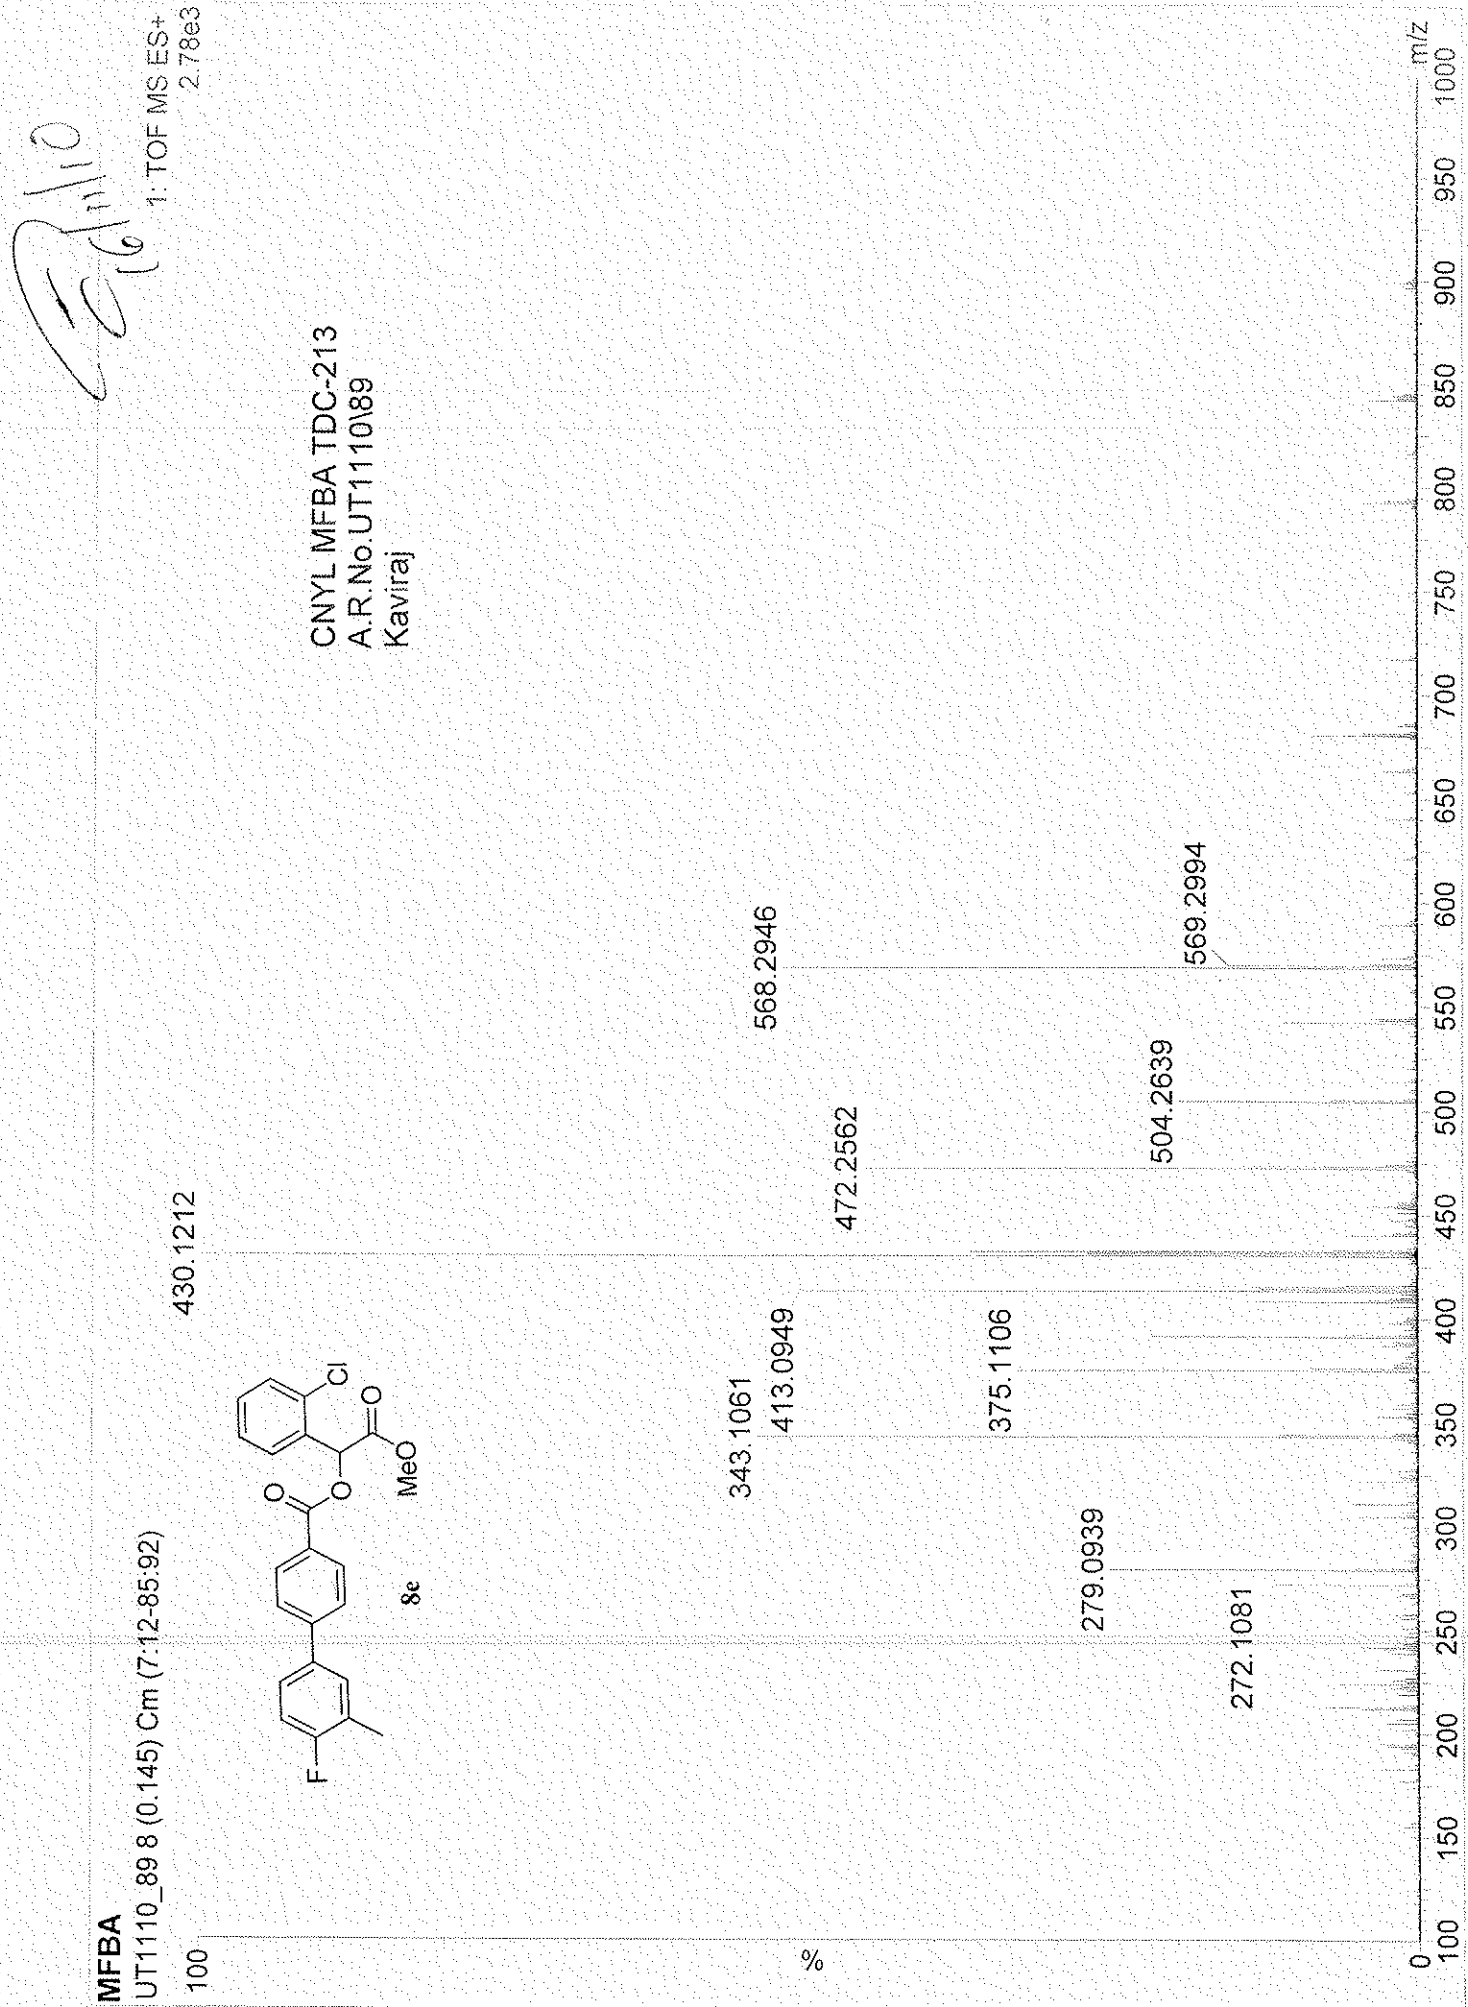

Elemental Composition Report

Single Mass Analysis

Tolerance = 5.0 PPM / DBE: min = -1.0, max = 80.0

Element prediction: Off

Number of isotope peaks used for i-FIT = 3

Monoisotopic Mass, Even Electron Ions

227 formula(e) evaluated with 4 results within limits (up to 4 best isotopic matches for each mass)

Elements Used:

C: 0-55 H: 0-65 O: 0-5 F: 0-3 Cl: 0-1

MFBA

UT1110\_89 8 (0.145) Cm (7:12-85:92)

1: TOF MS ES+  
1.41e+003

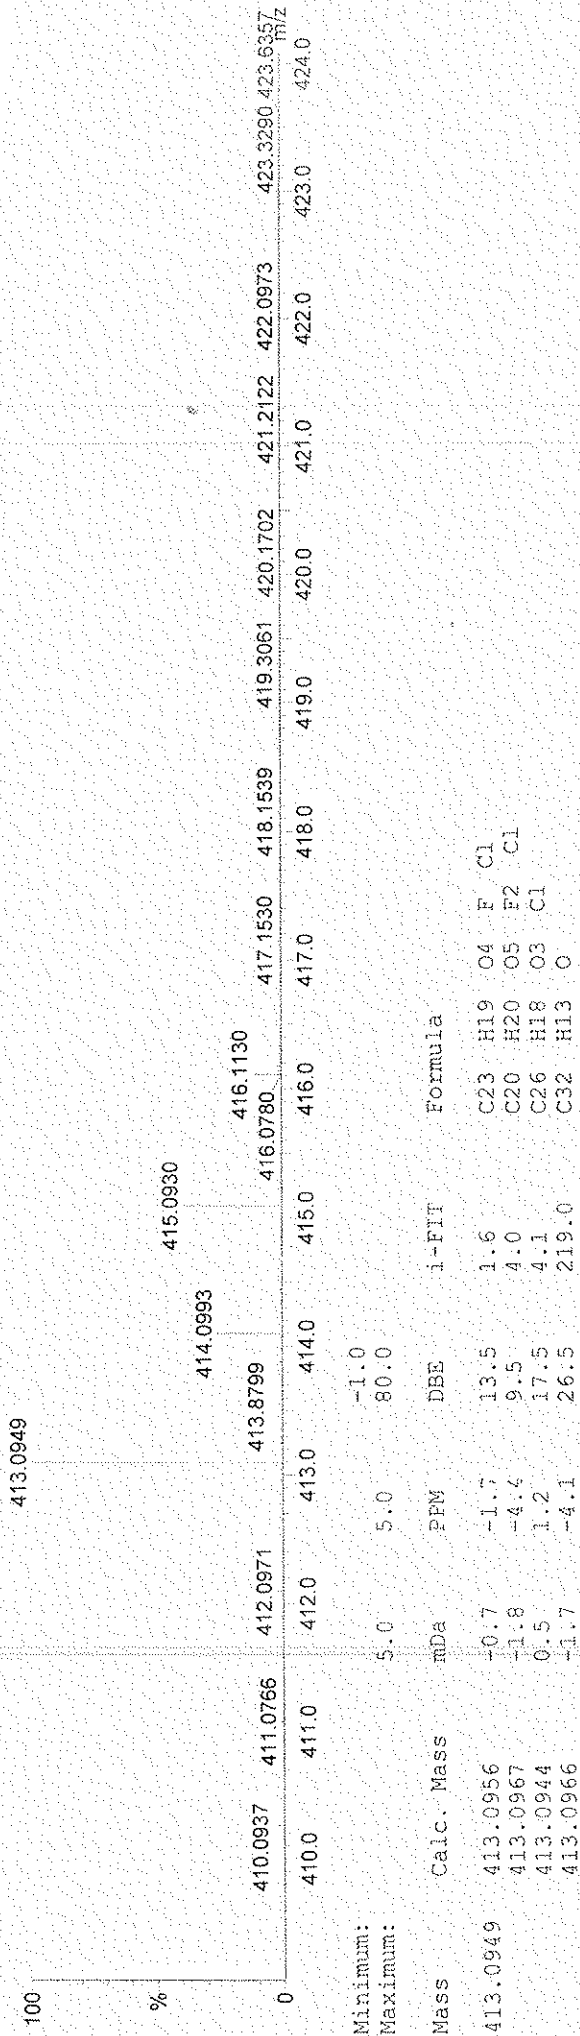

WDC-213 2BAS4 in DMSO

NMR-400MHZ

AR.No:ME1011/2278

Analyst: Ganesh

Date:28th Oct.2011

NUCLEUS : <sup>1</sup>H  
FREQ (MHz) : 400.23  
EXP : zgpg30

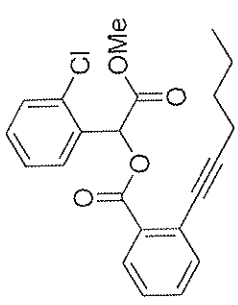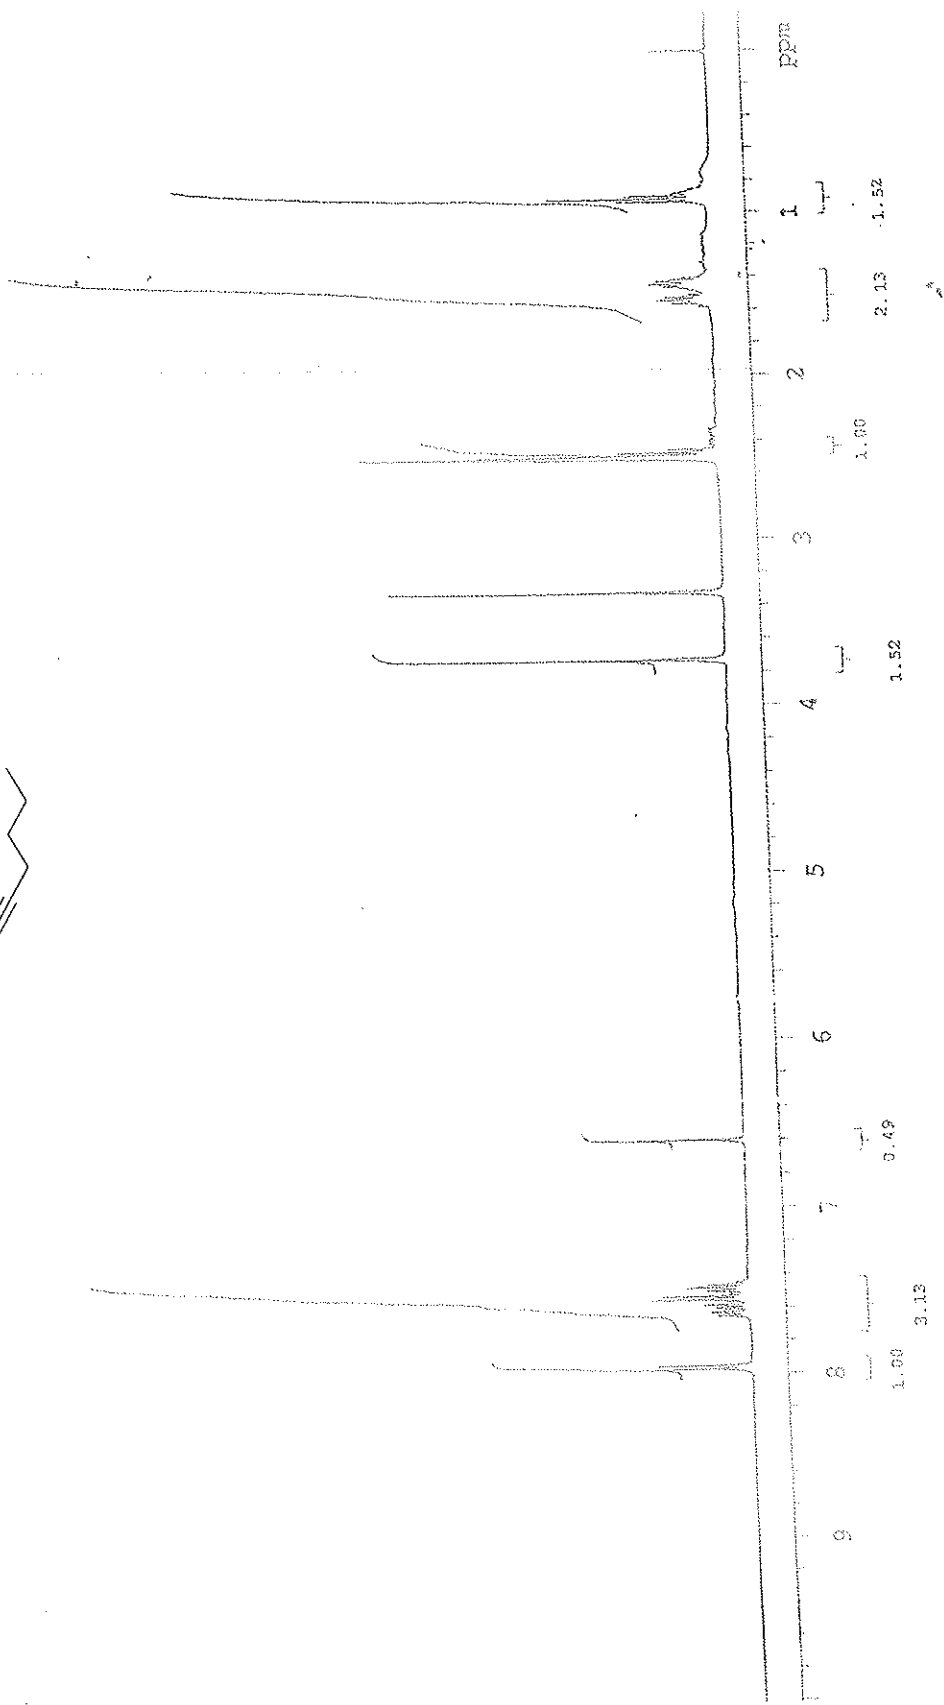



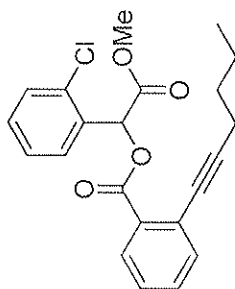

TDC-213 BRS4 in DMSO

NMR-400MHZ

AR.No:ME1111/963

Analyst: Haribabu

Date:08th Nov.2011

NUCLEUS : <sup>13</sup>C

FRQ (MHz): 100.65

EXP : s2pul

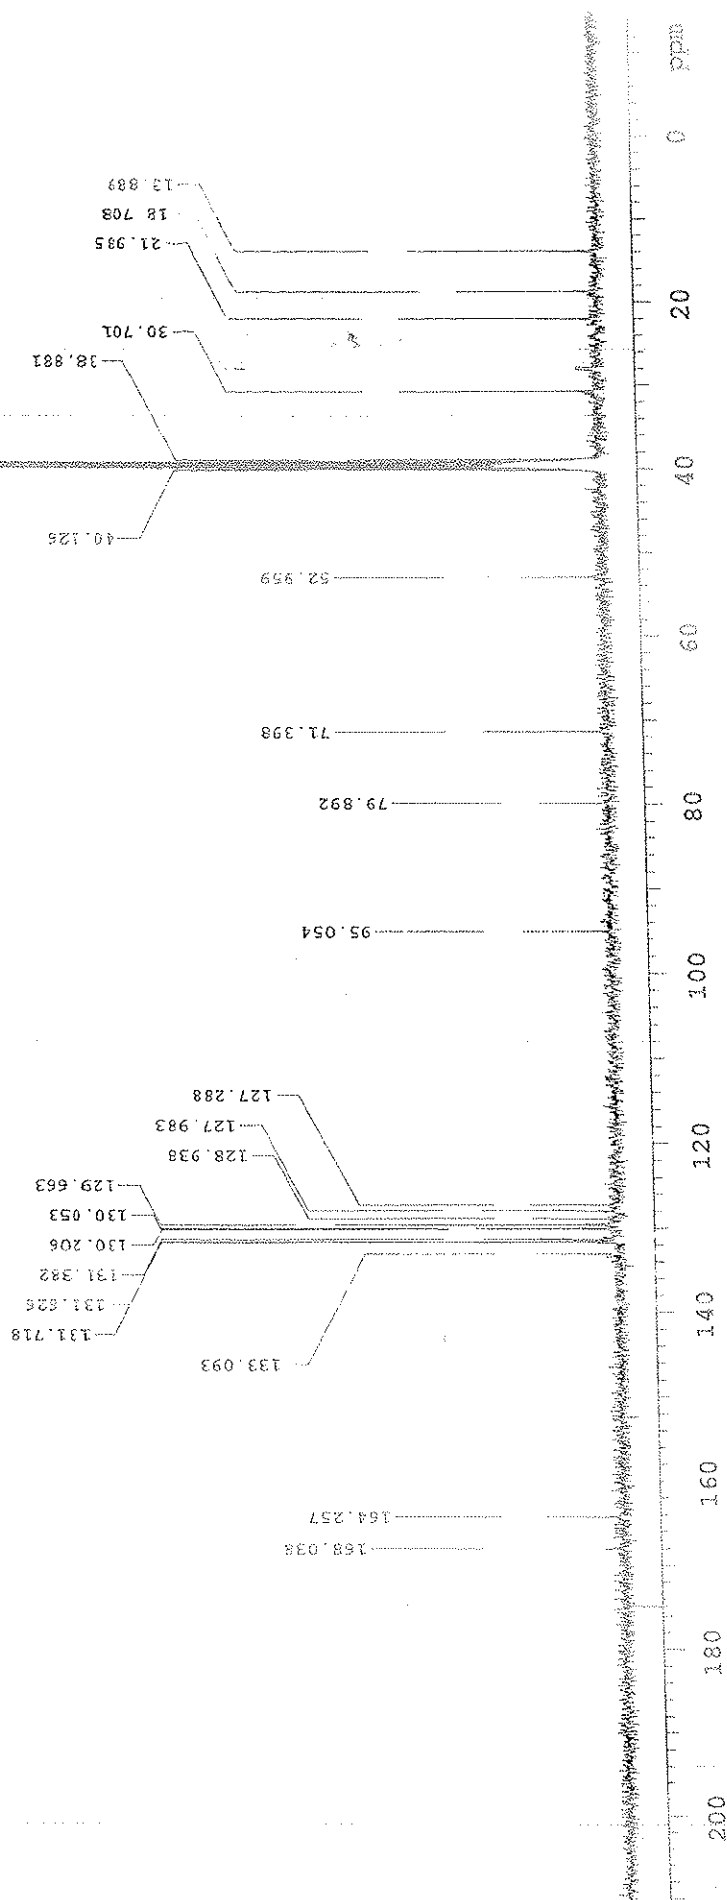

Single Mass Analysis

Tolerance = 10.0 PPM / DBE: min = 0.0, max = 80.0  
Element prediction: Off  
Number of isotope peaks used for i-FIT = 4

Monoisotopic Mass, Even Electron Ions  
17 formula(e) evaluated with 1 results within limits (up to 4 best isotopic matches for each mass)

Elements Used:

C: 0-25 H: 0-25 O: 0-6 Cl: 0-1

BAS4

Dr.Reddy's Laboratories Ltd, ARD,TDC-1

10-Nov-2011  
Kaviraj  
1: TOF MS ES+  
5.16e+003

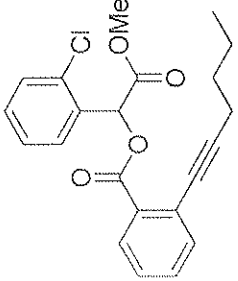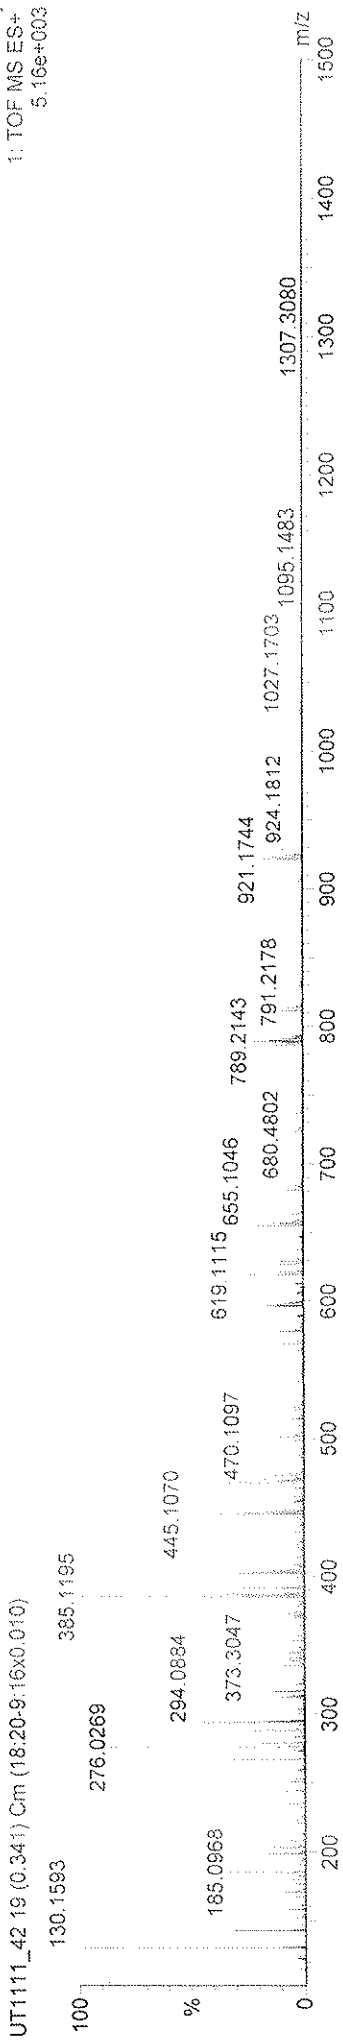

Minimum:  
Maximum:

5.0 10.0 0.0 80.0

| Mass     | Calc. Mass | mDa  | PPM  | DBE  | i-FIT | Formula       |
|----------|------------|------|------|------|-------|---------------|
| 385.1195 | 385.1207   | -1.2 | -3.1 | 11.5 | 2.9   | C22 H22 O4 Cl |

2011/11/20

10-Nov-2011  
Kaviraj  
1: TOF MS ES+  
5.16e3

Dr.Reddy's Laboratories Ltd, AR&D,TDC-1

BAS4

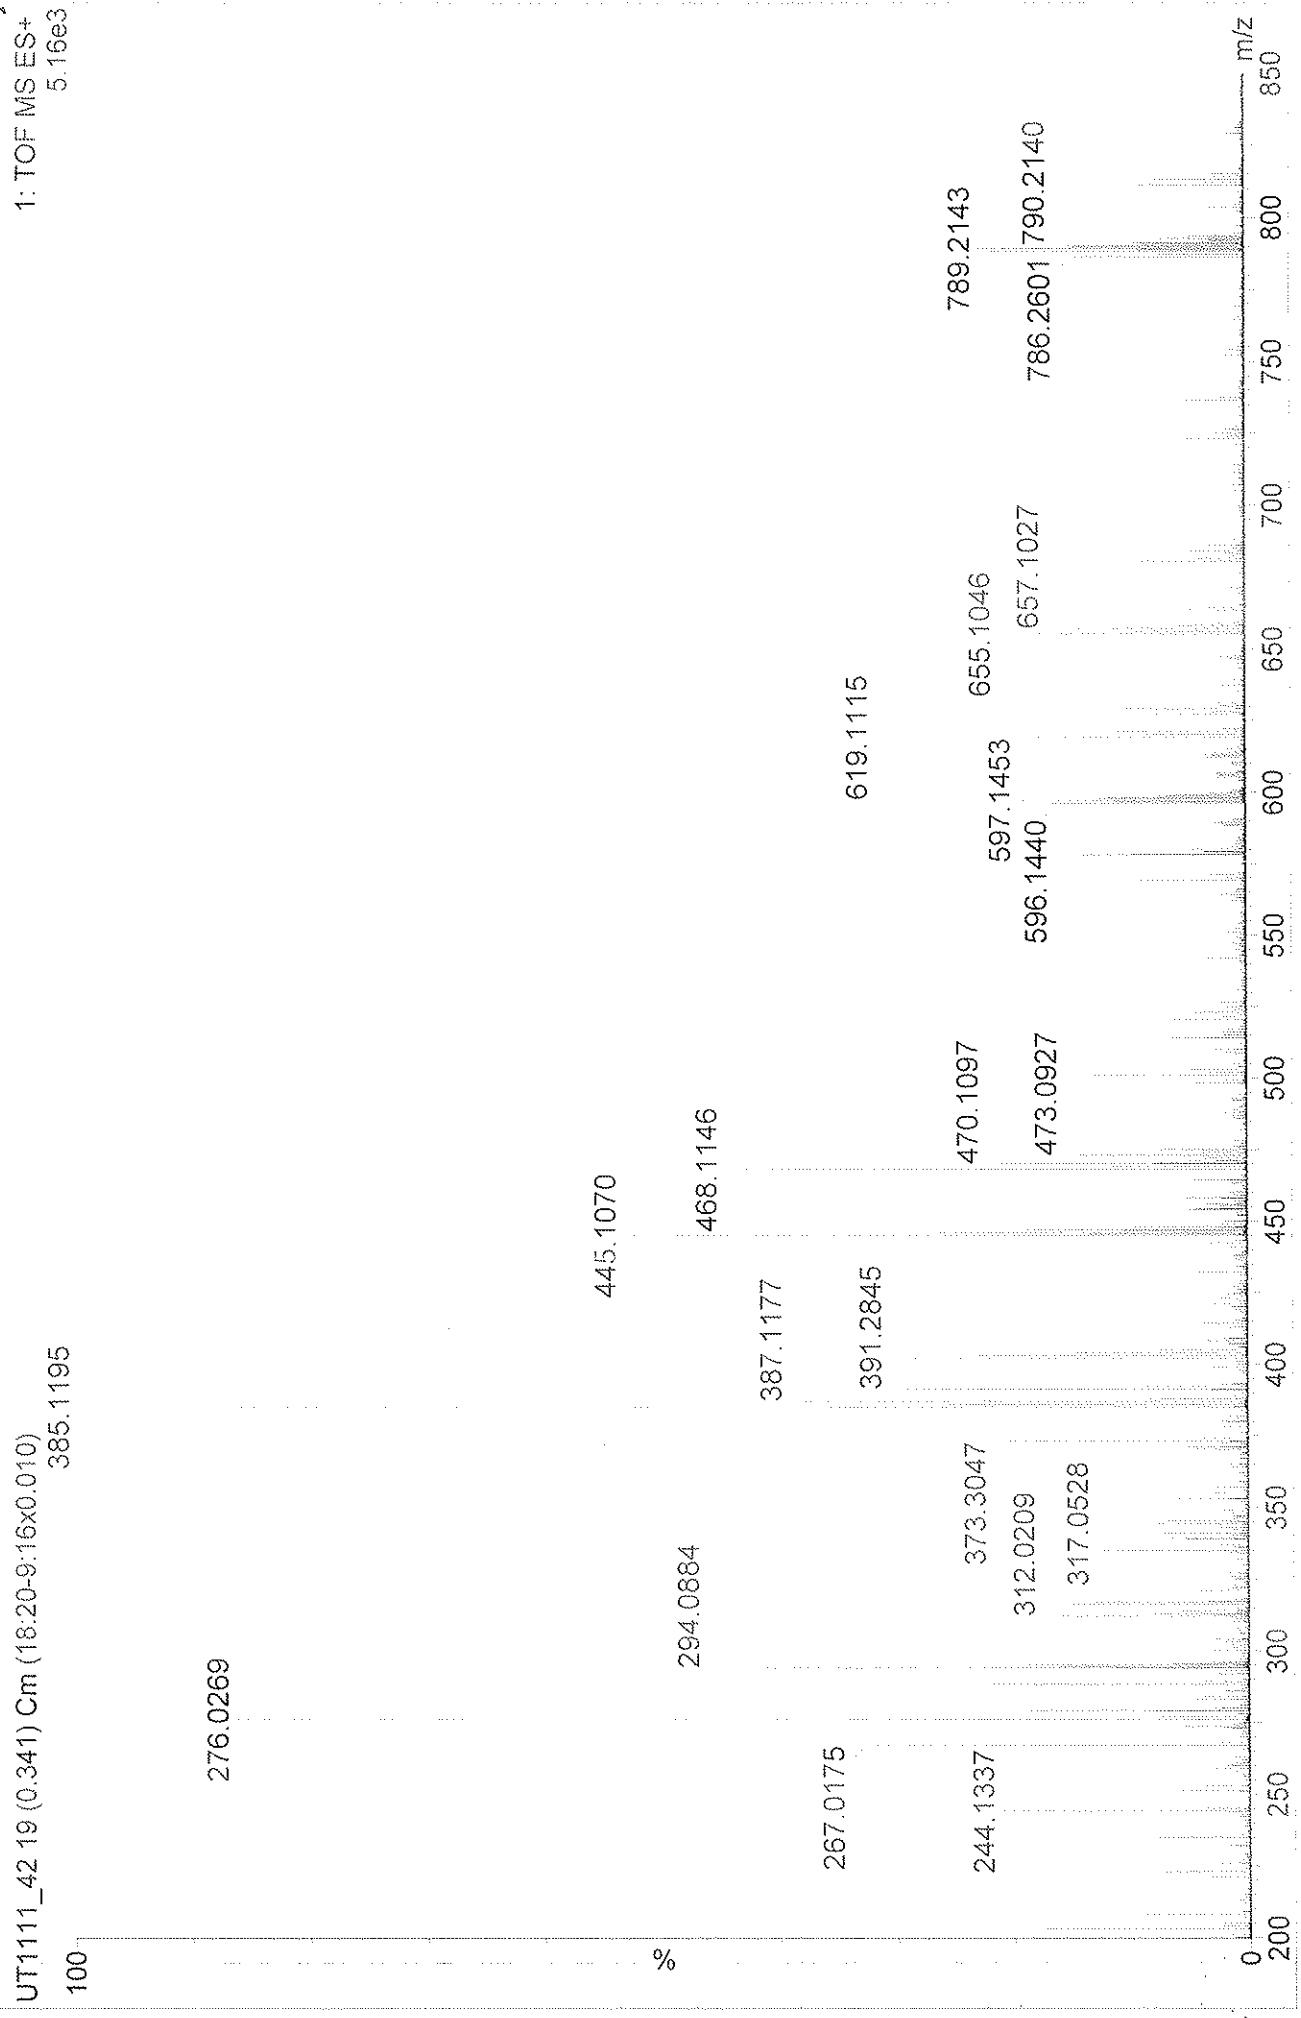

Bohls  
10/11/2011

TDC-213 EtAC in DMSO

NR-400MHZ  
AR.No:ME111/144  
Analyst: Haribabu  
Date:02nd Nov.2011

NUCLEUS : H1  
PRQ (MHz): 400.23  
EXP : s2pul

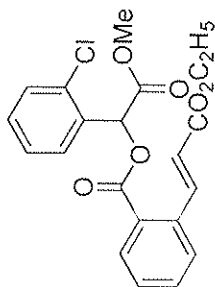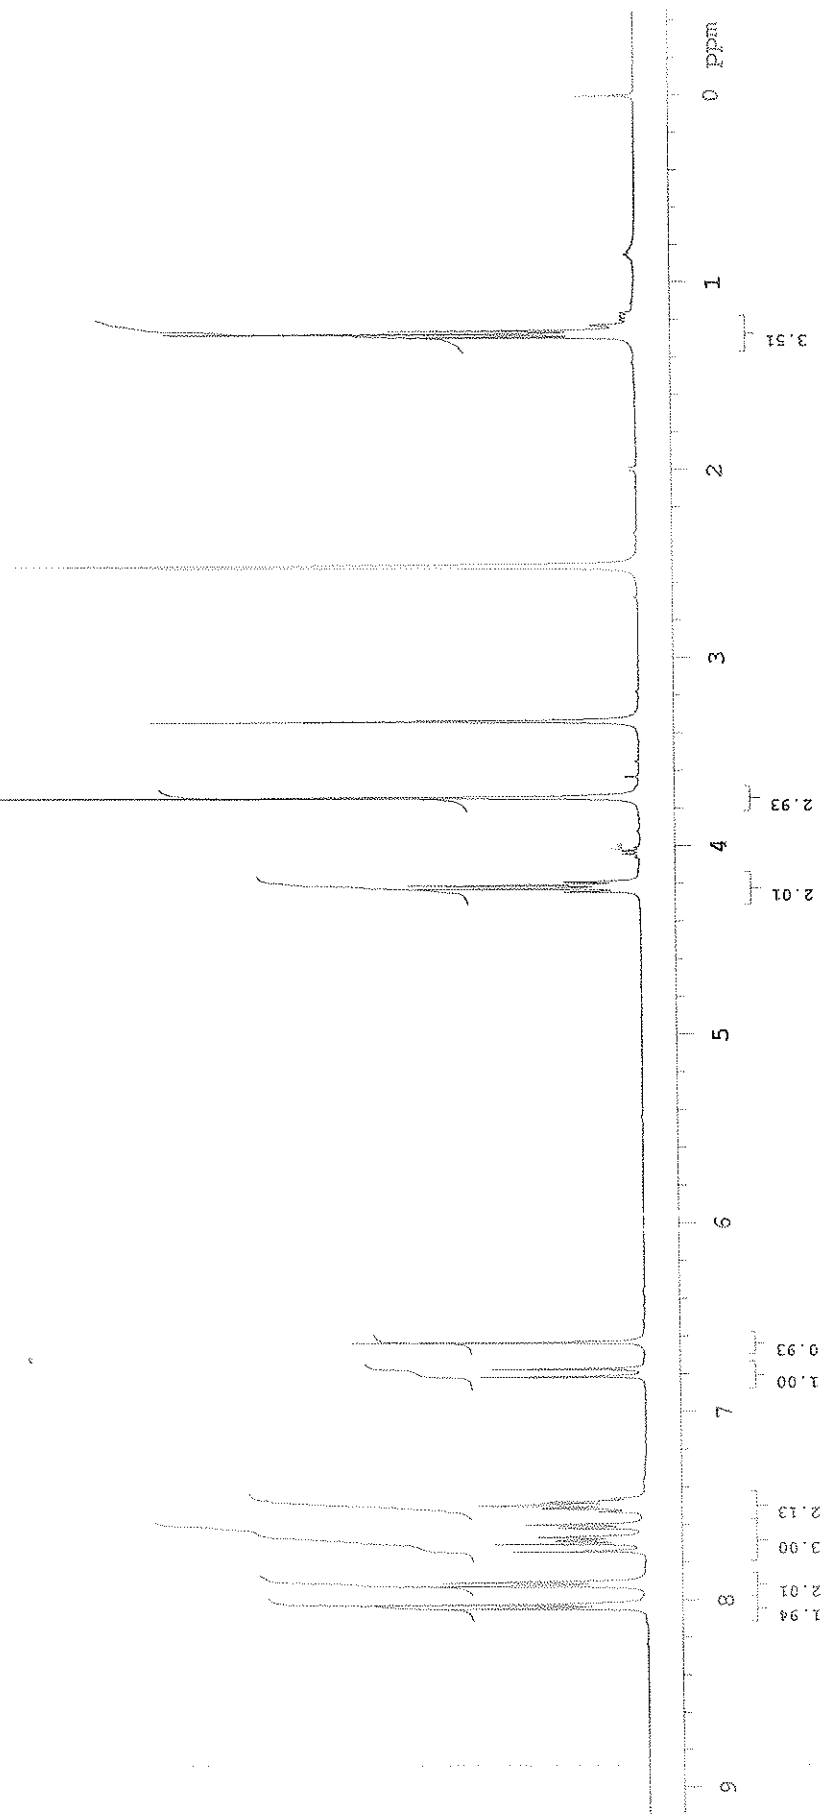



TDC-213 EtAc in DMSO

NMR-400MHZ

AR.No:ME1111/599

Analyst: Haribabu

Date: 04th Nov. 2011

NUCLEUS : C13

FRQ (MHz): 100.65

EXP : s2pul

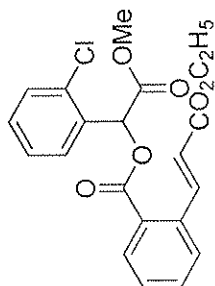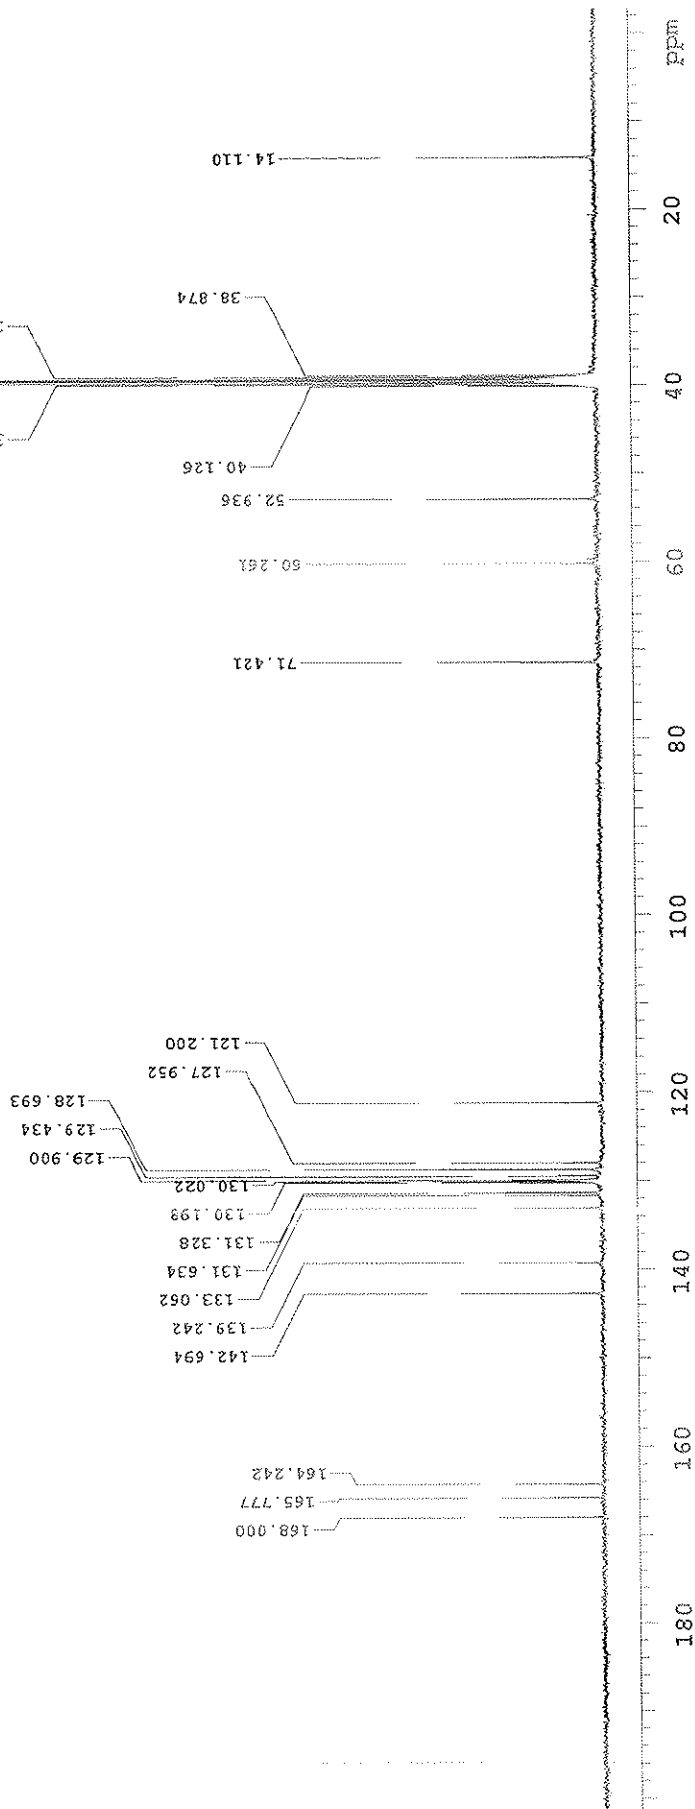

Elemental Composition Report

Single Mass Analysis

Tolerance = 5.0 PPM / DBE: min = 0.0, max = 80.0

Element prediction: Off

Number of isotope peaks used for i-FIT = 4

Monoisotopic Mass, Even Electron Ions

31 formula(e) evaluated with 1 results within limits (up to 4 best isotopic matches for each mass)

Elements Used:

C: 0-30 H: 0-30 O: 0-6 Cl: 0-1

ETAC

UT1111\_43 24 (0.426) Cm (24.28-5.8x0.010)

Dr.Reddy's Laboratories Ltd, ARD,TDC-1

10-Nov-2011  
Kaviraj  
1: TOF MS ES+  
1.08e+004

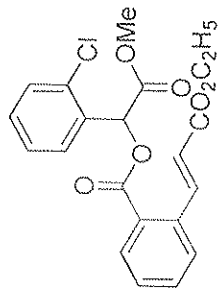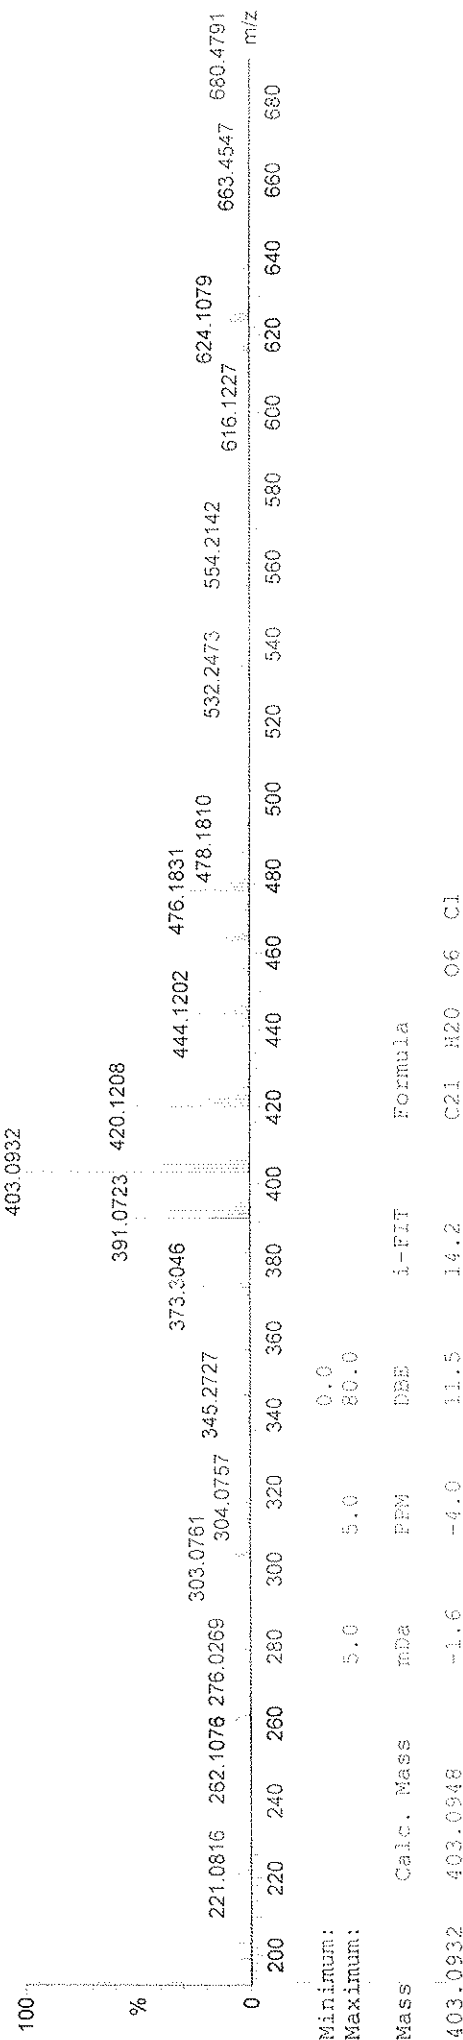

Minimum:  
Maximum:

Mass

Calc. Mass

403.0932

nDa

-1.6

PPM

-4.0

DBE

11.5

i-FIT

14.2

Formula

C21 H20 O6 Cl

Patel  
10/11/2011

Dr.Reddy's Laboratories Ltd, AR&D,TDC-1

10-Nov-2011  
Kaviraj  
1: TOF MS ES+  
1.08e4

ETAC

UT1111\_43 24 (0.426) Cm (24:28-5:8x0.010)

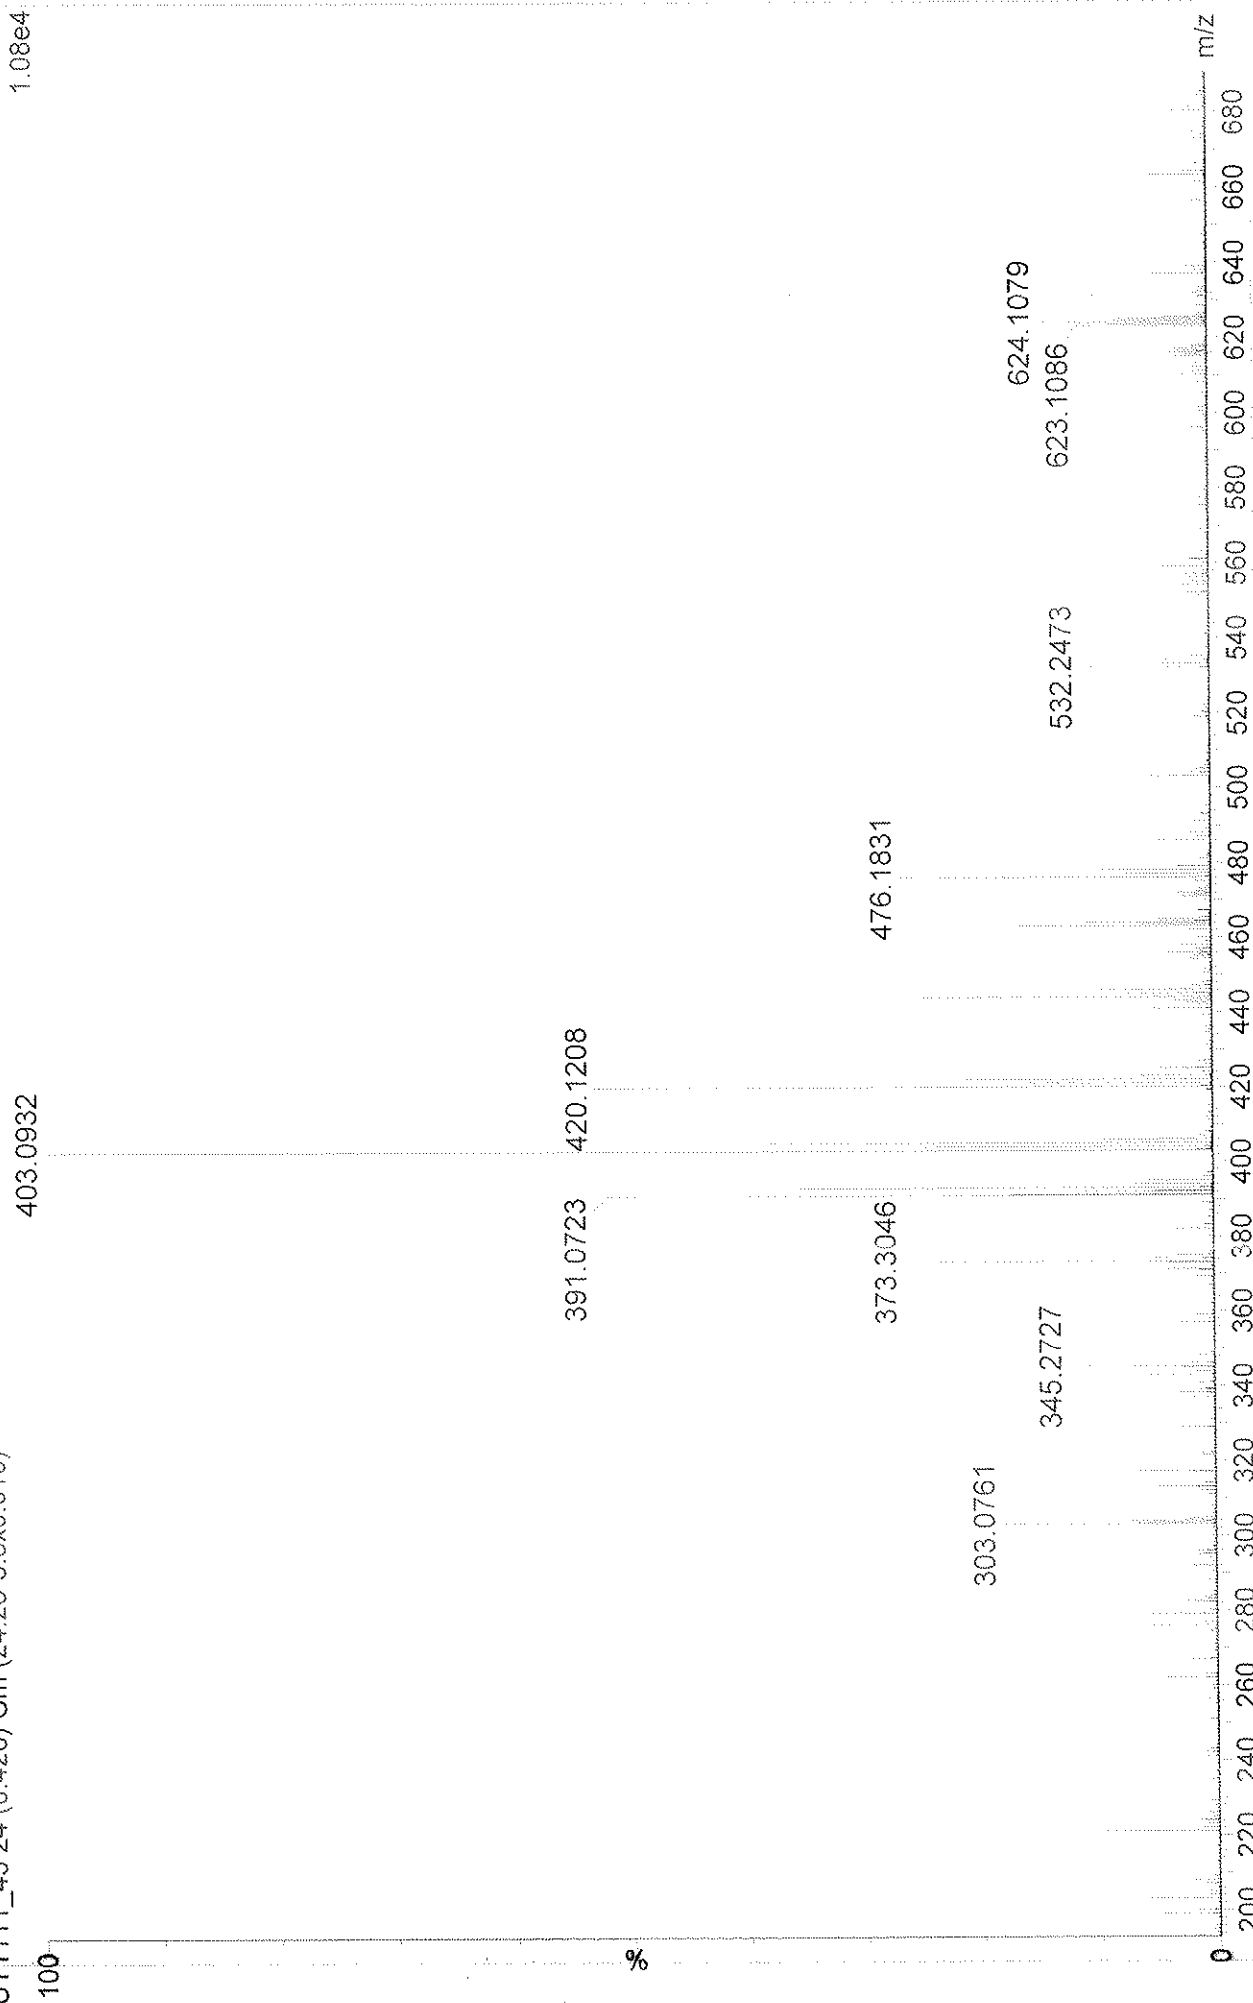

Kaviraj  
10/11/2011

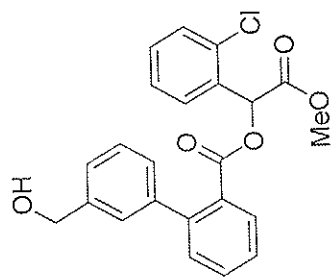

TDC-213 PHEA AP DMSO

NMR-400MHZ  
AR.No:ME1011/3210  
Analyst: Ganesh  
Date:28th Oct.2011

NUCLEUS : H1  
FRQ (MHz) : 400.23  
EXP : s2pul

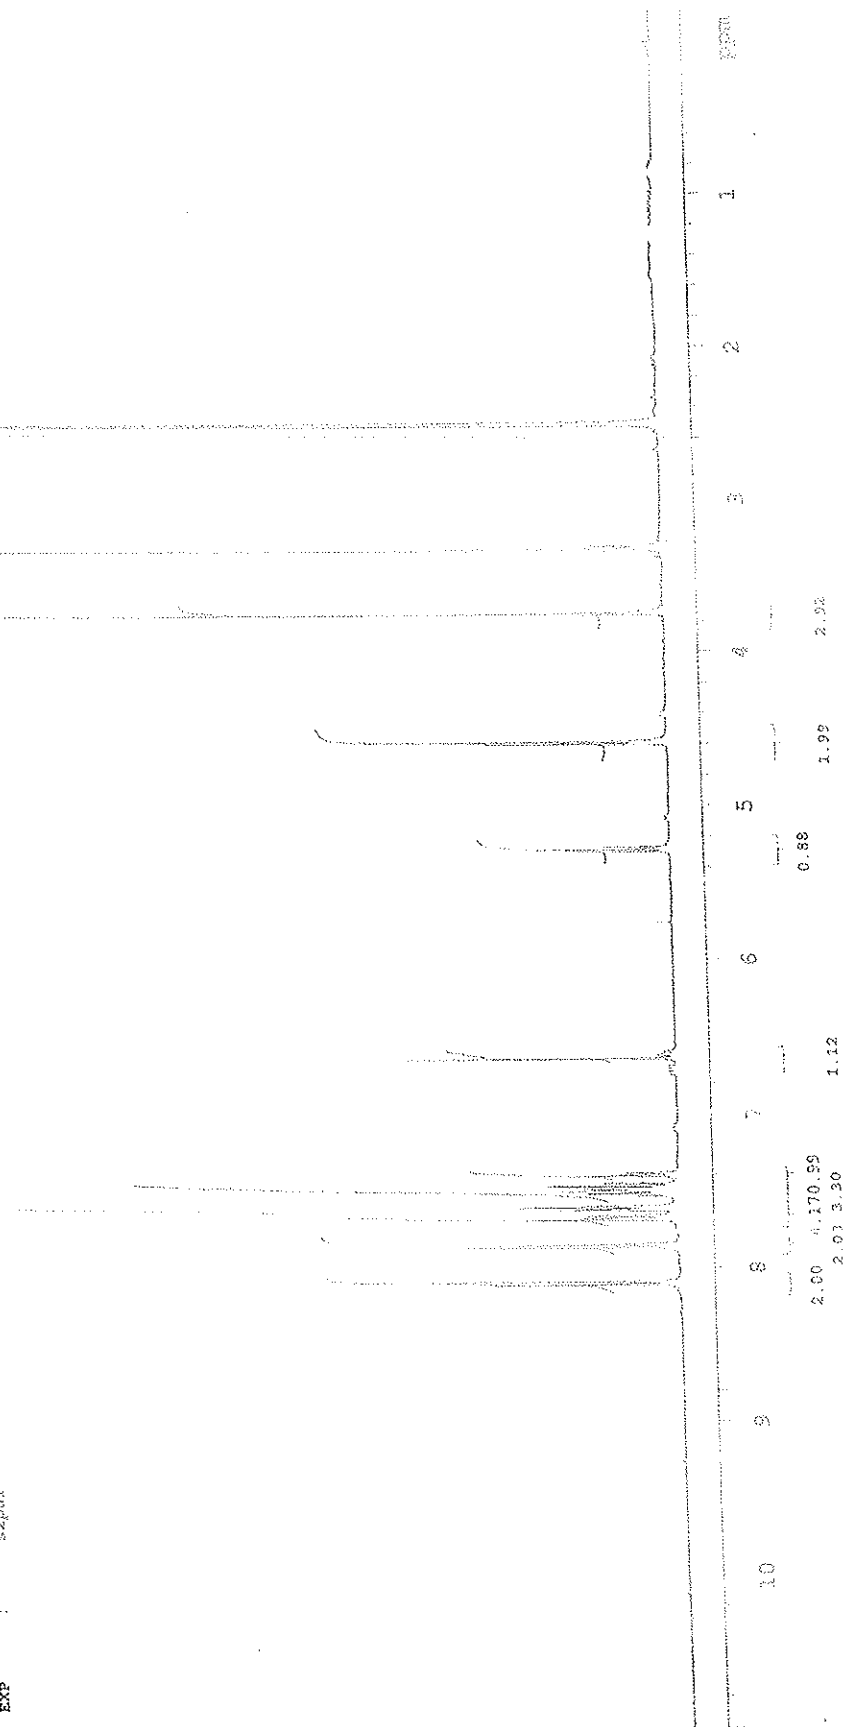



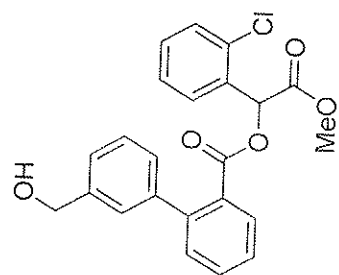

TDC-213 PHEA in DMSO

NMR-400MHZ

AR.No:ME1111/600

Analyst: Haribabu

Date:04th Nov.2011

NUCLEUS : C13  
FREQ (MHz): 100.65  
EXP : 52pul

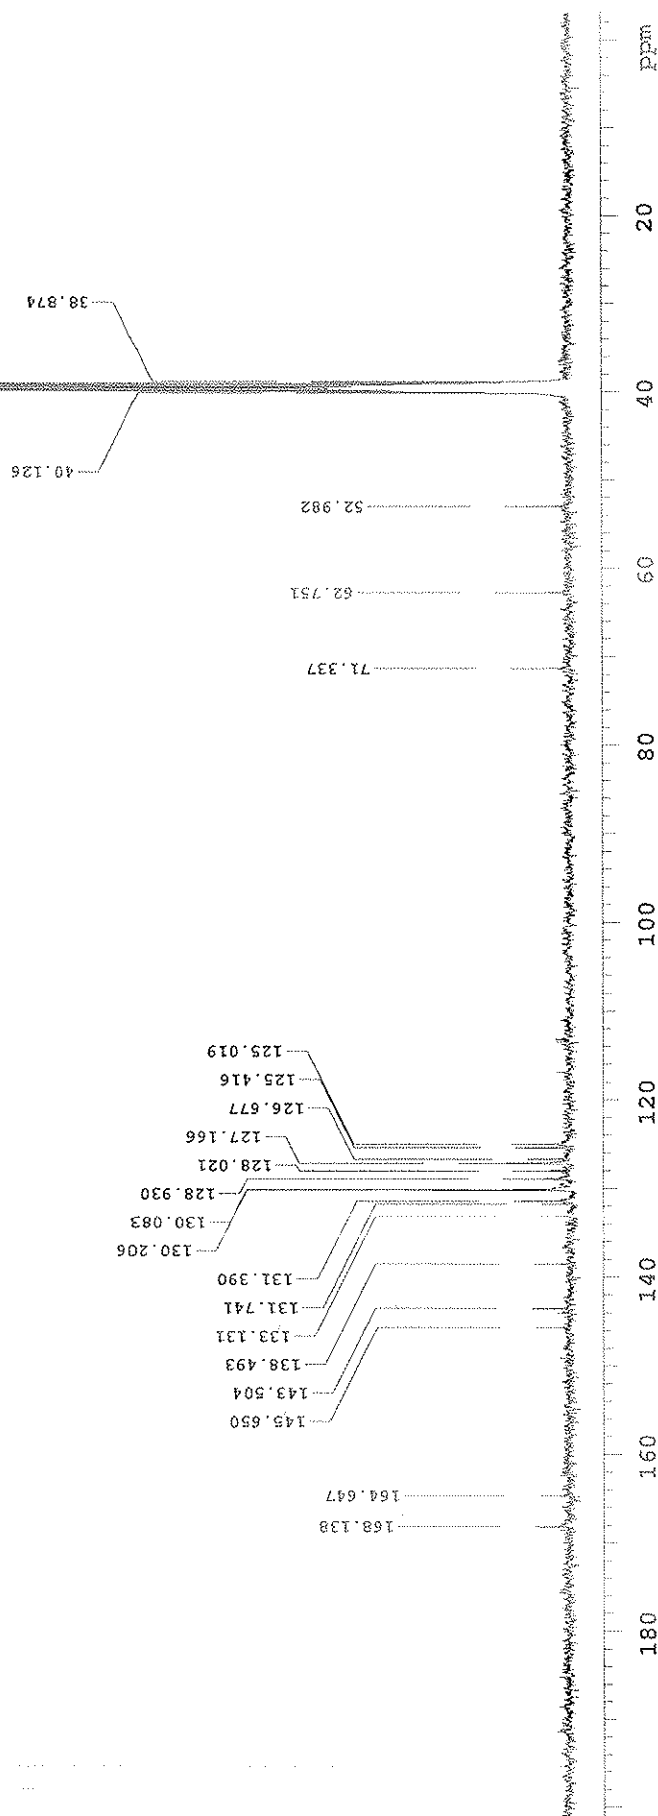

11/12/2011  
10:43:13

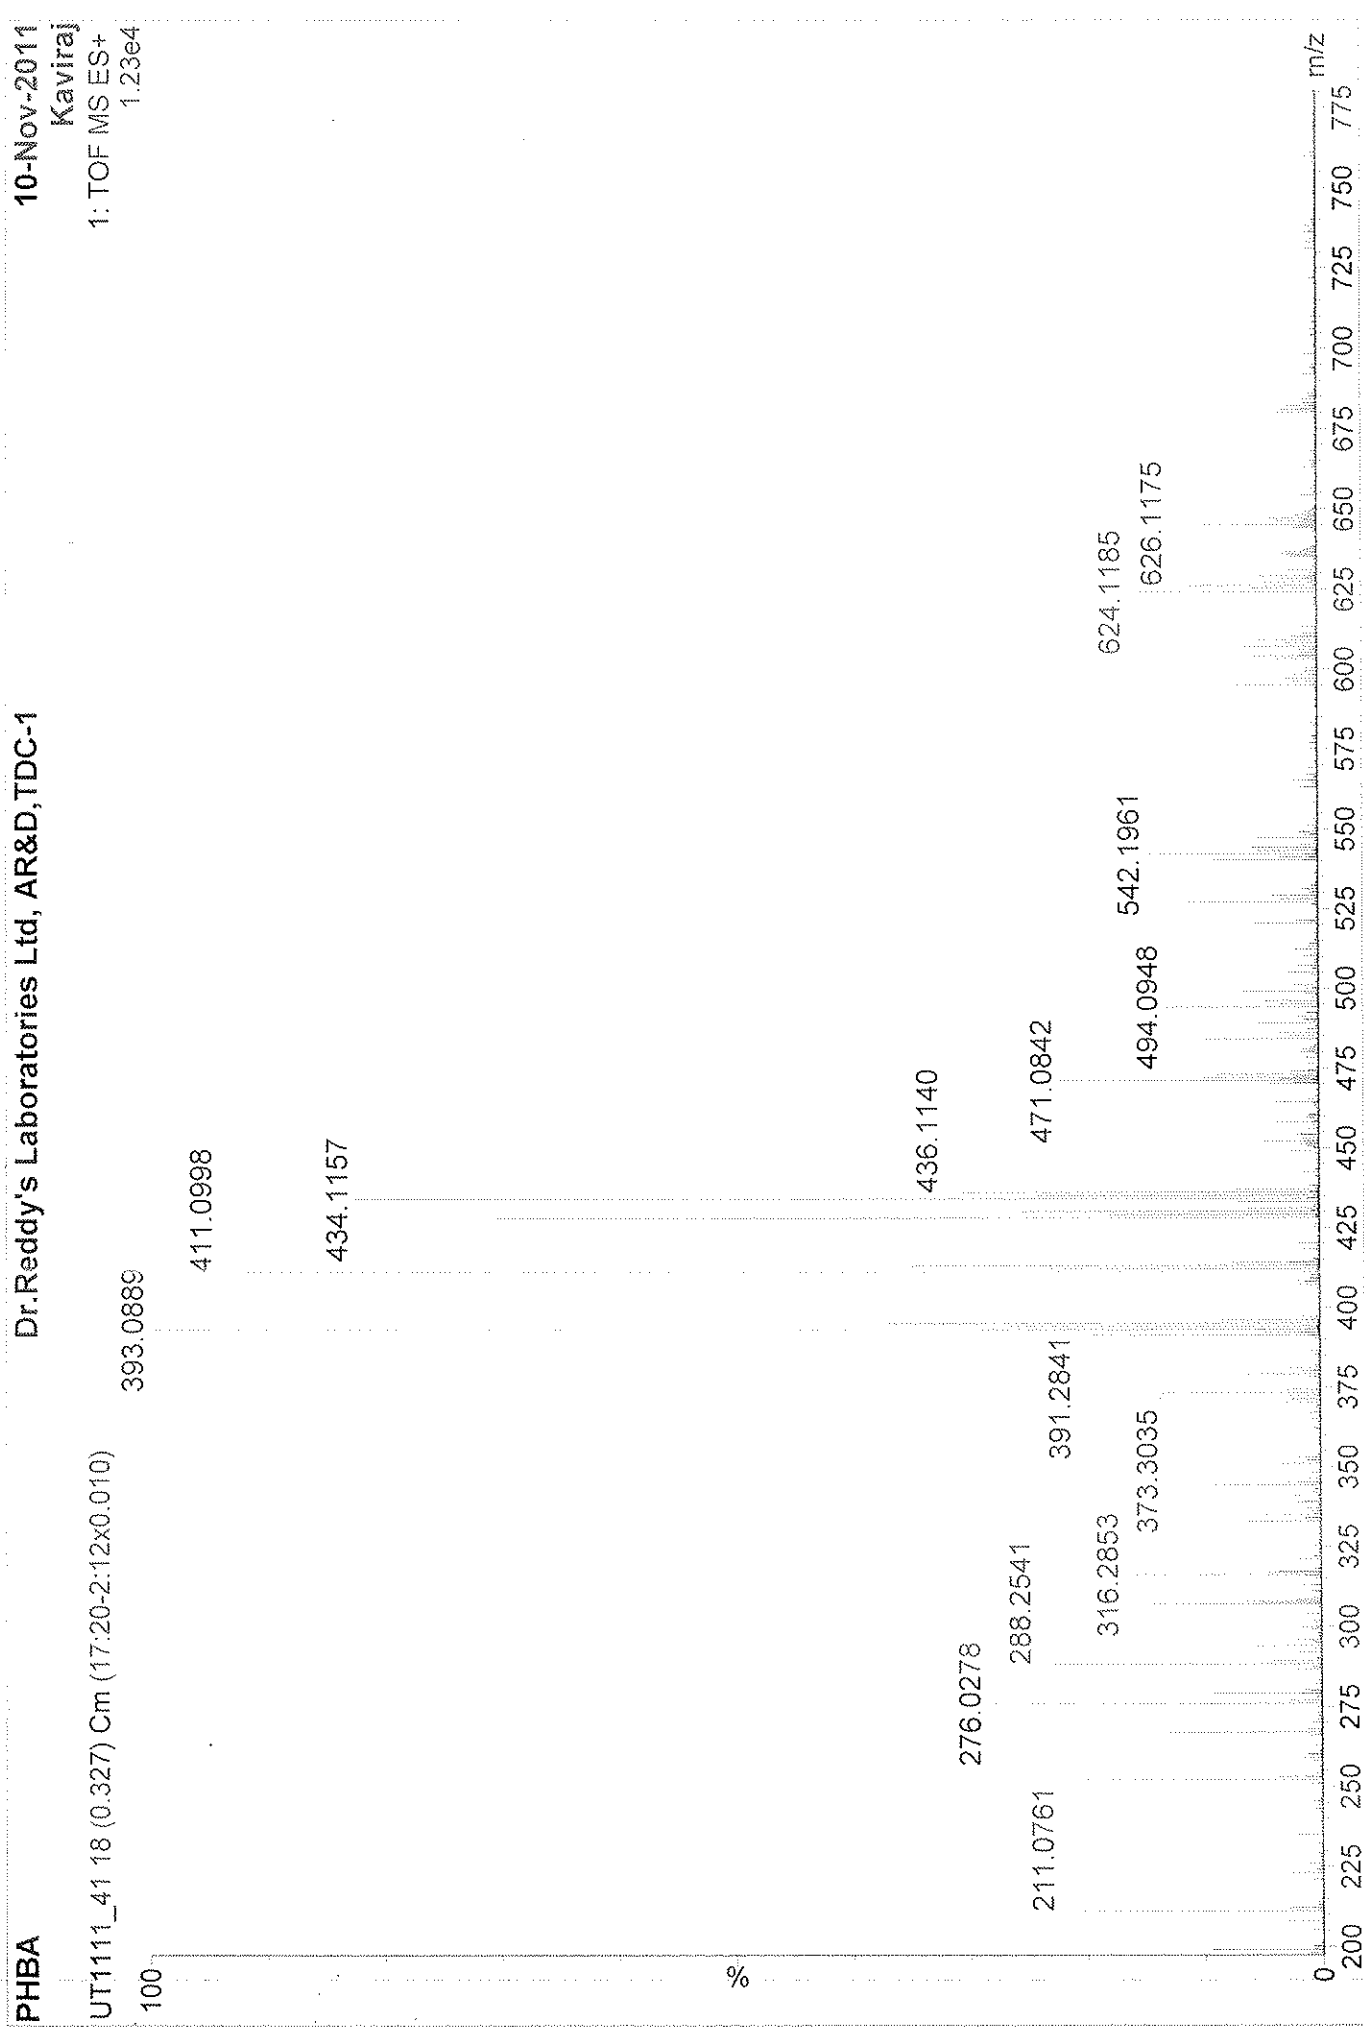

Bob Kelly  
10/11/2011

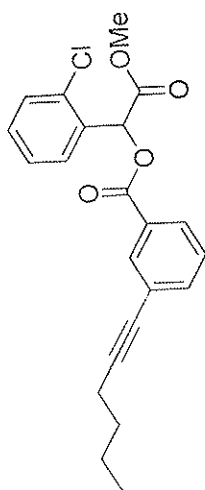

TDC-213 3BAS4 in DMSO

NMR-400MHZ

AN.N:ME1111/846

Analyst: Ganesh

Date:08th Nov.2012

NUCLEUS : <sup>1</sup>H  
FREQ (MHz): 400.23  
EXP : szpul

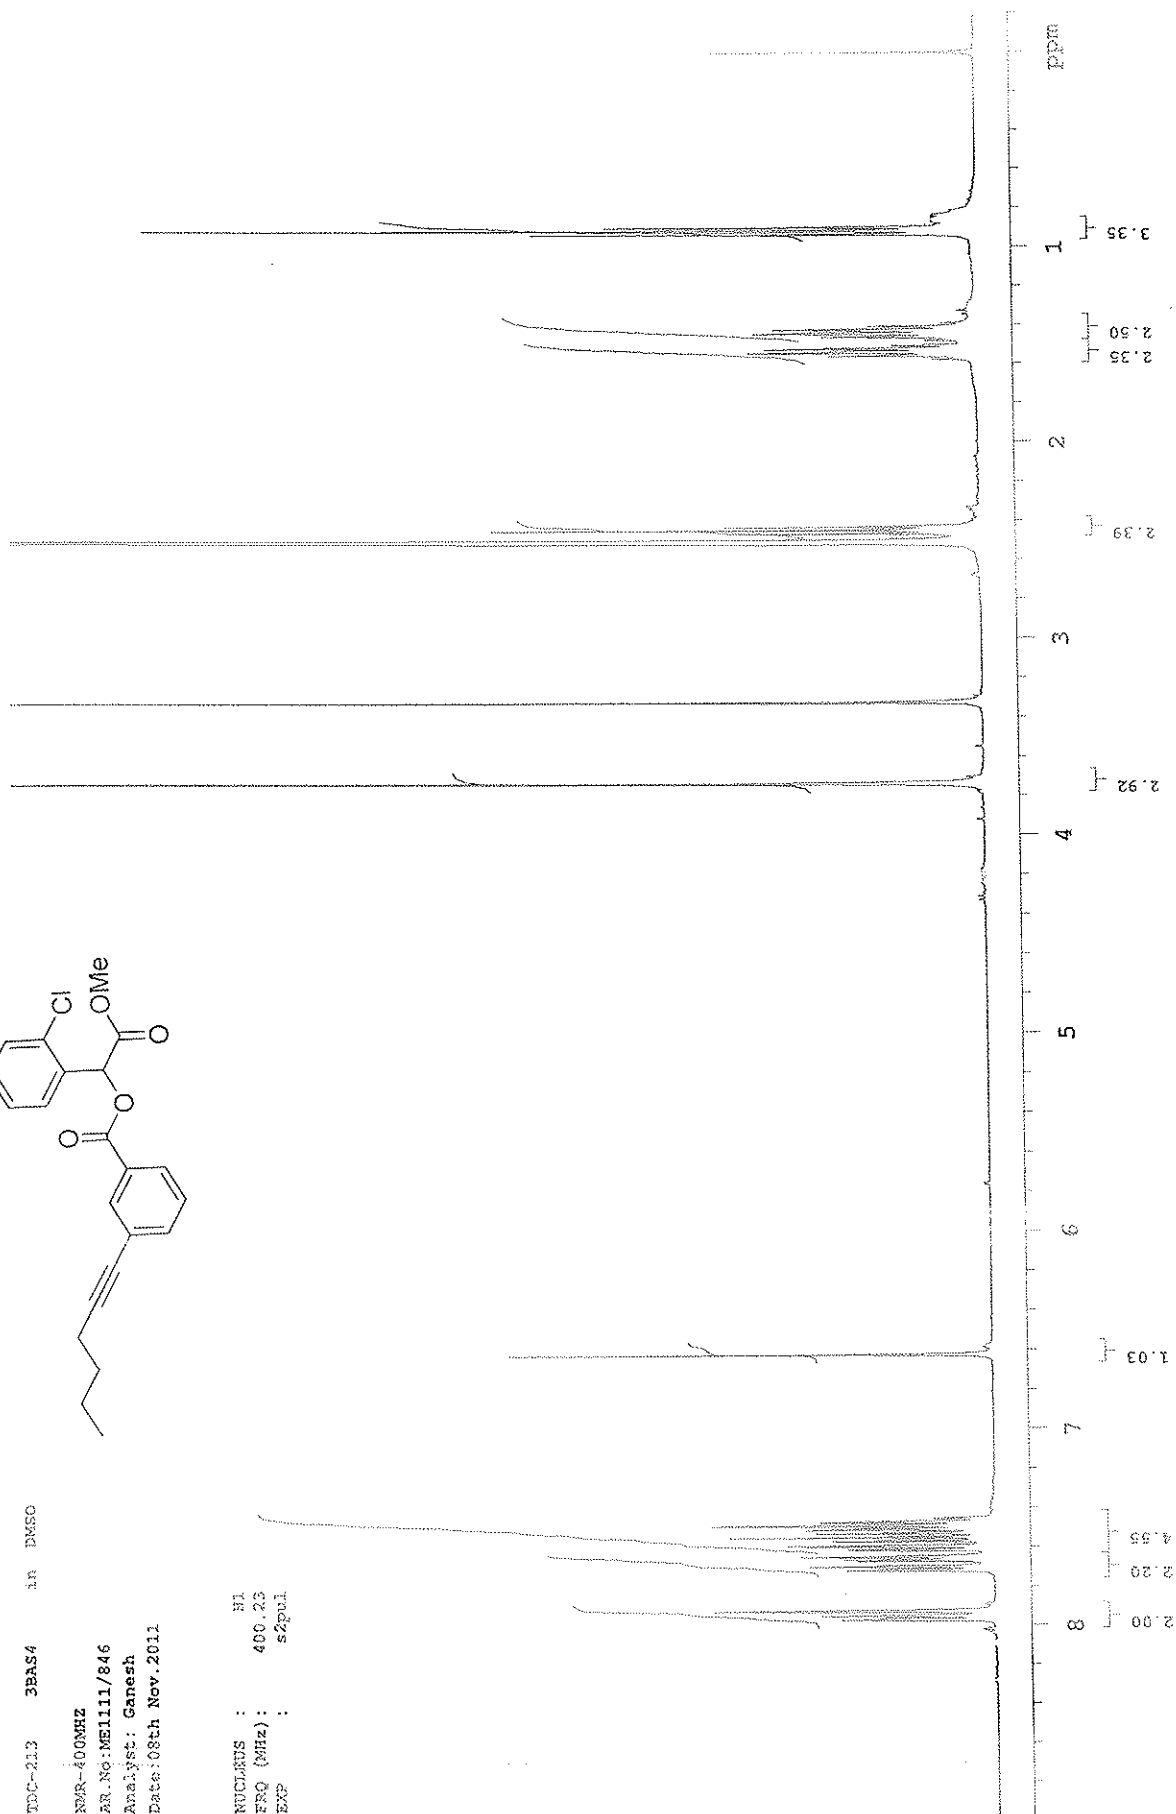



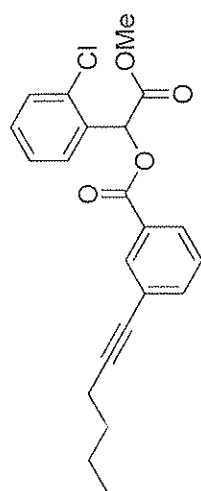

TDC-213 3BAS4 in DMSO

NMR-400MHZ  
AR.No:ME1111/962  
Analyst: Haribabu  
Date: 08th Nov. 2011

NUCLEUS : C13  
FREQ (MHz): 100.65  
EXP : s2pul

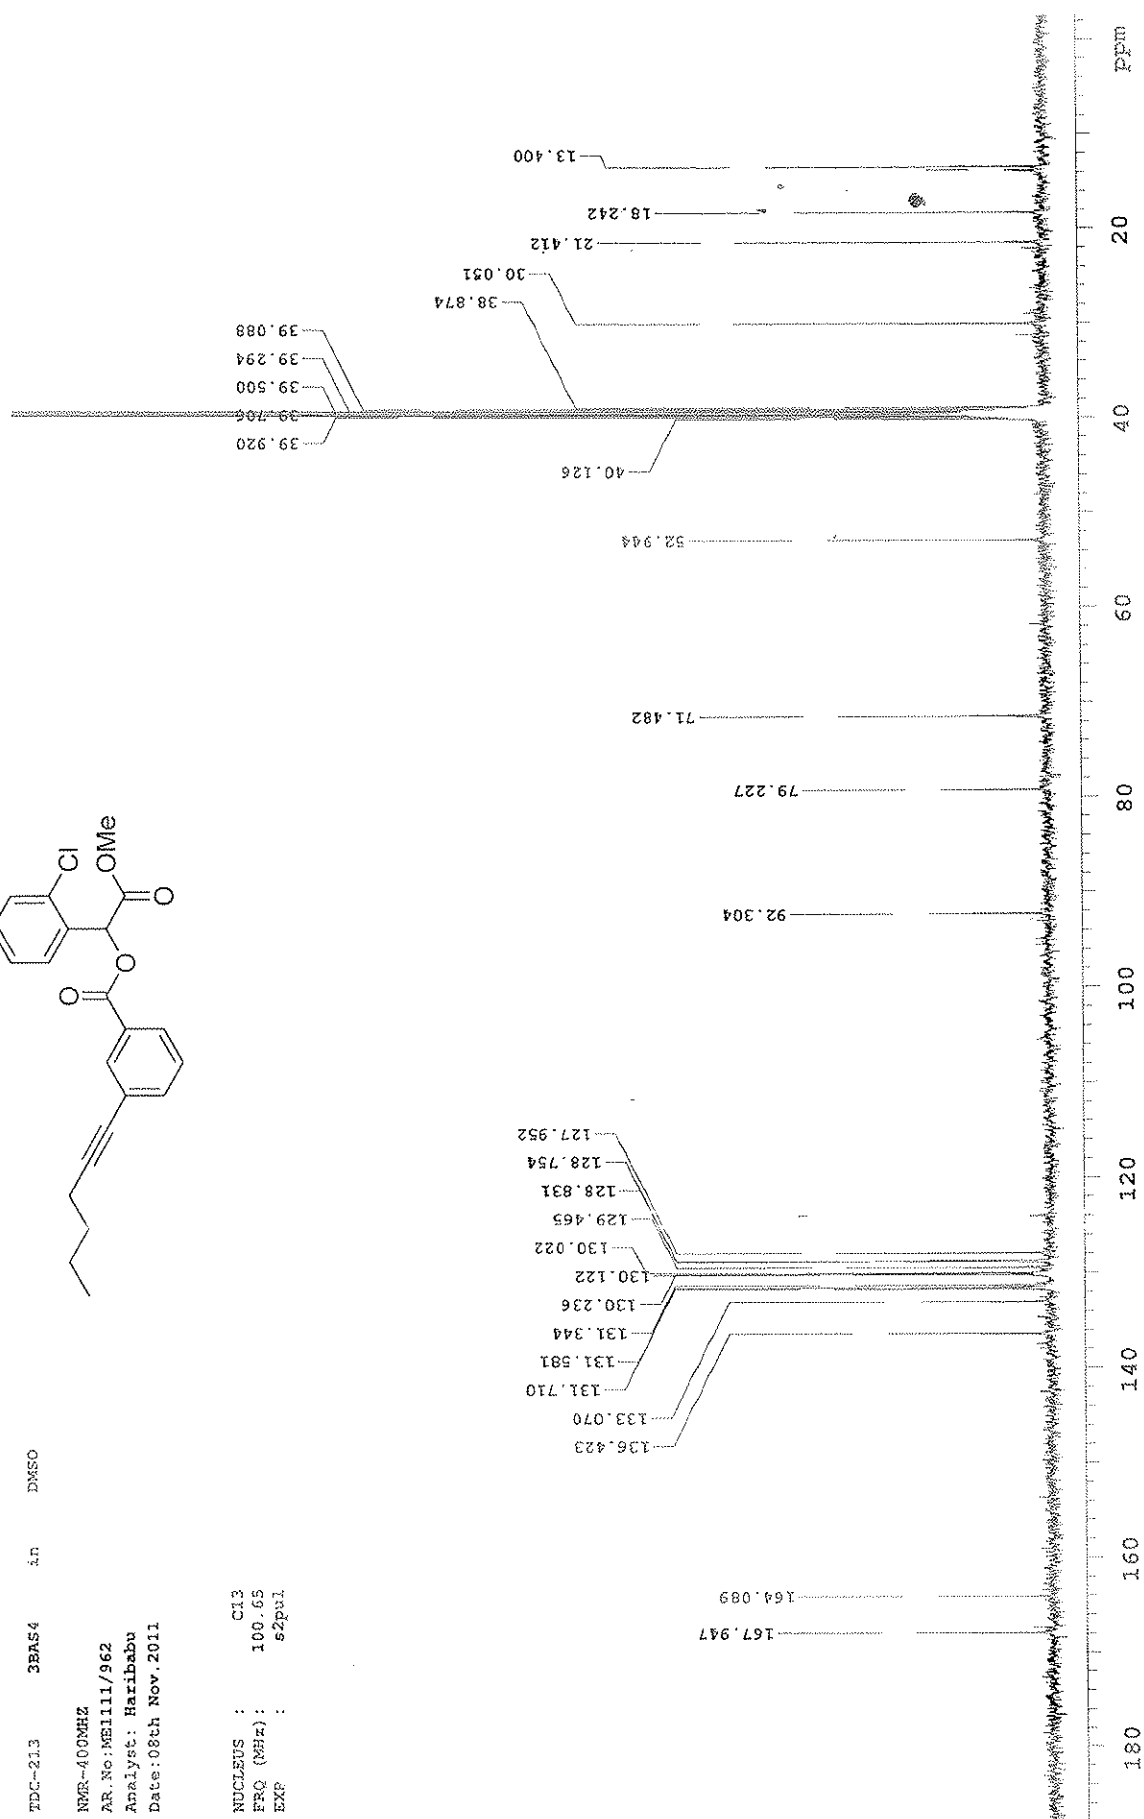

### Single Mass Analysis

Tolerance = 5.0 PPM / DBE: min = 0.0, max = 80.0

Element prediction: Off

Number of isotope peaks used for i-FIT = 4

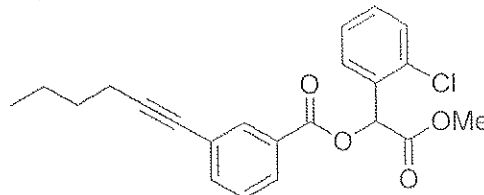

Monoisotopic Mass, Even Electron Ions

24 formula(e) evaluated with 1 results within limits (up to 4 best isotopic matches for each mass)

Elements Used:

C: 0-30 H: 0-30 O: 0-4 Cl: 0-1

3BAS4

Dr.Reddy's Laboratories Ltd, ARD,TDC-1

09-Nov-2011

Kaviraj

UT1111\_39 21 (0.385) Cm (21:24-1:12x0.010)

1: TOF MS ES+  
1.82e+004

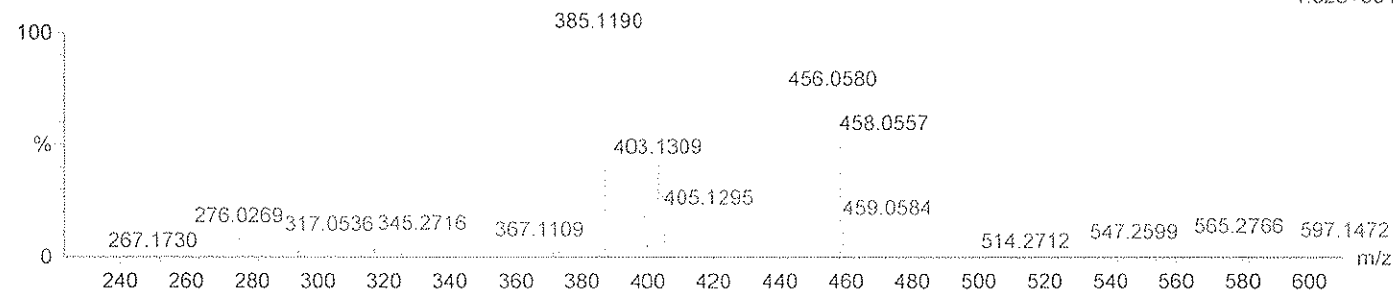

Minimum:

Maximum: 5.0 5.0 0.0 80.0

| Mass     | Calc. Mass | mDa  | PPM  | DBE  | i-FIT | Formula       |
|----------|------------|------|------|------|-------|---------------|
| 385.1190 | 385.1207   | -1.7 | -4.4 | 11.5 | 33.5  | C22 H22 O4 Cl |

*Bohler*

05/11/2011

09-Nov-2011  
Kaviraj  
1: TOF MS ES+  
1.82e4

Dr.Reddy's Laboratories Ltd, AR&D,TDC-1

3BAS4  
UT1111\_39 21 (0.385) Cm (21:24-1:12x0.010)

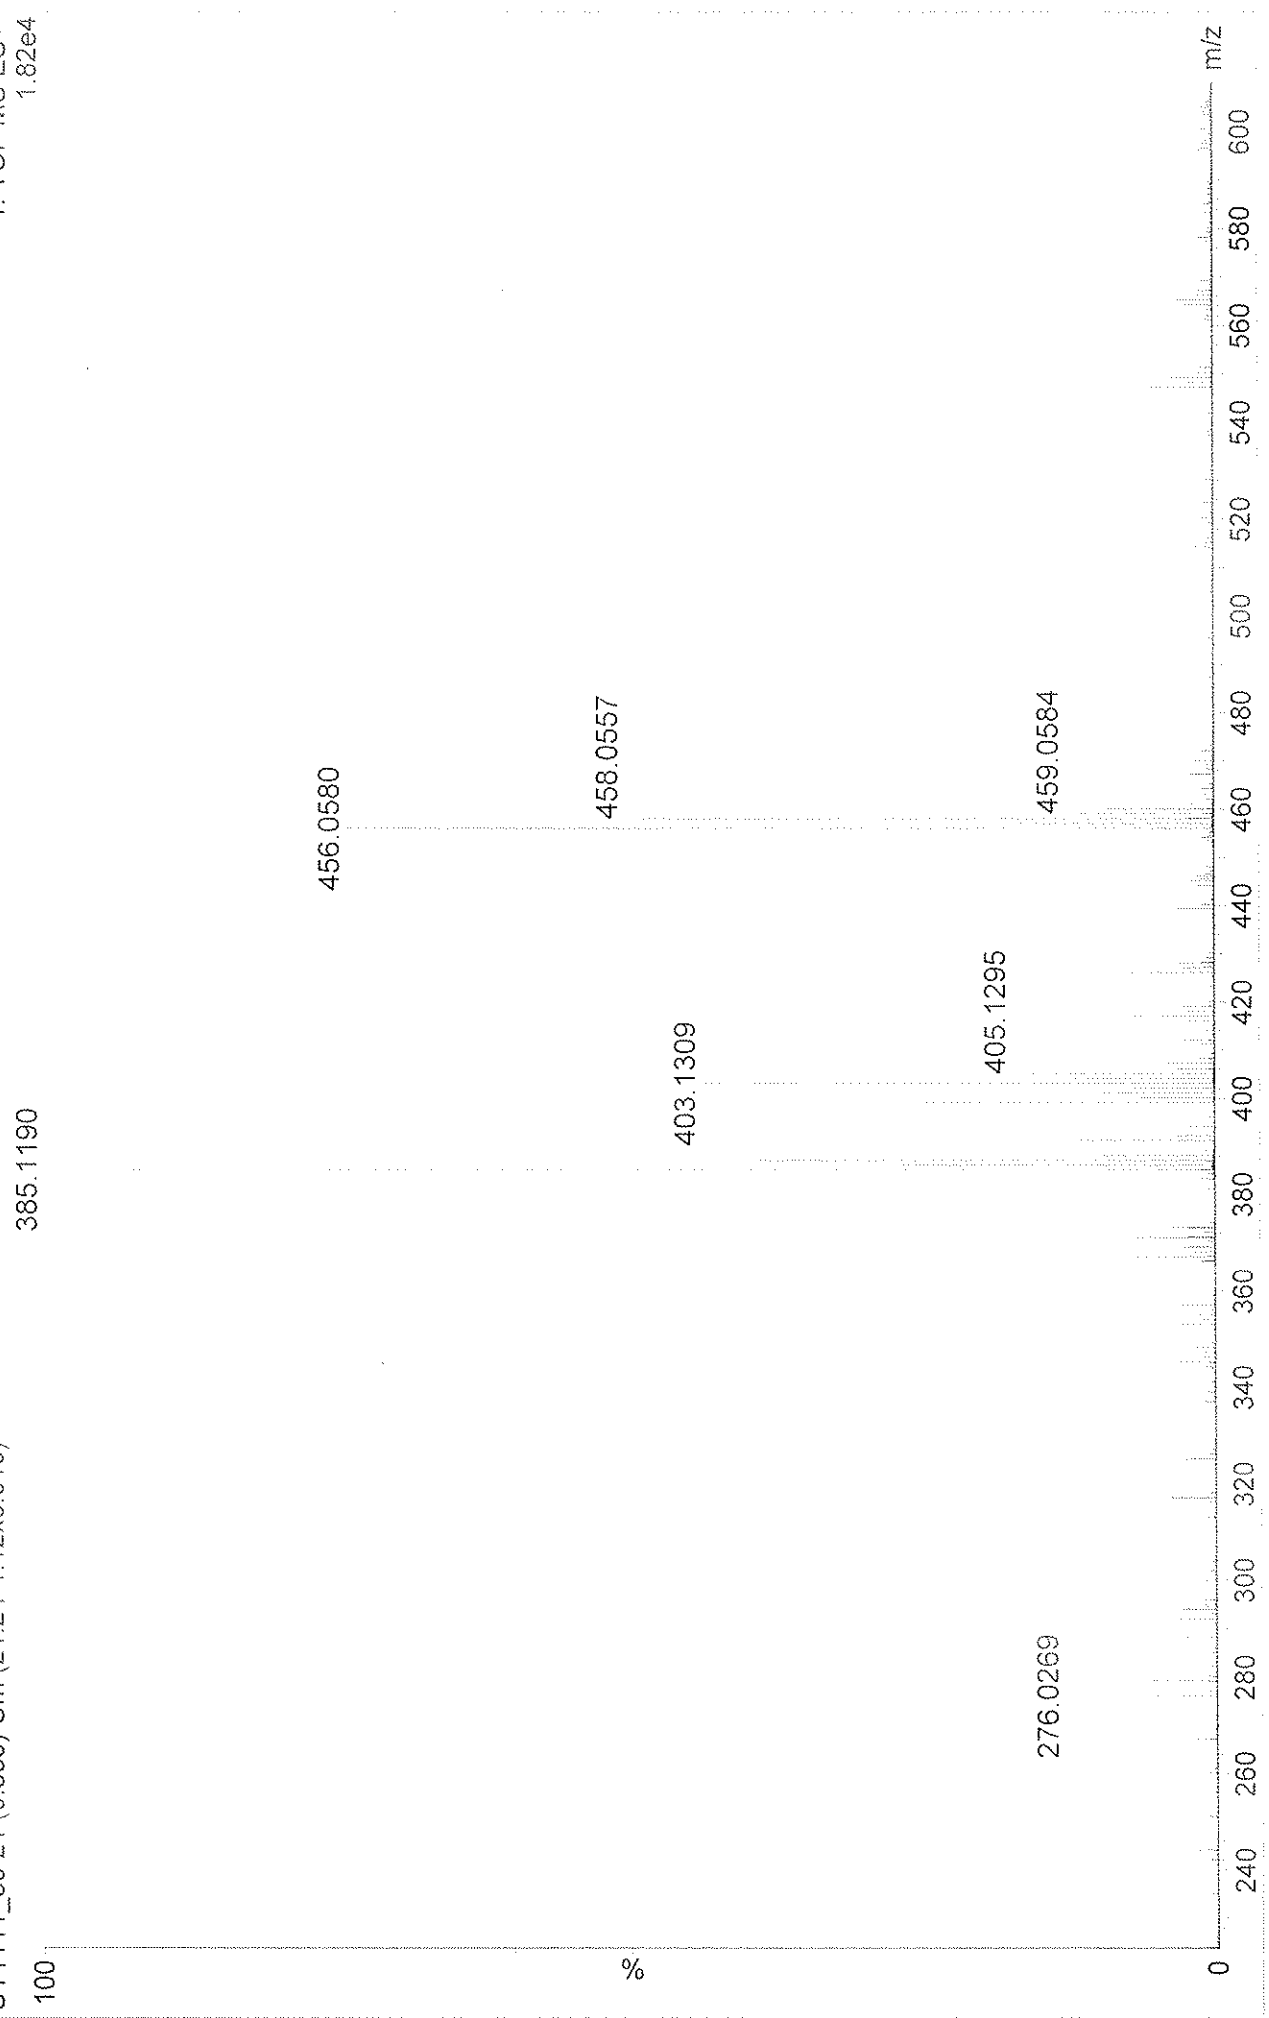

Boblog  
05/11/2011

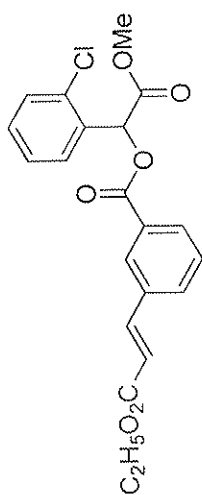

TIC-213 3ETAC in DMSO

NNR-400MHZ  
Ac.No:ME1111/1375  
Analyst: Ganesh  
Date: 11th Nov.2011

NUCLEUS : <sup>1</sup>H  
FREQ (MHz): 400.25  
EXP : s2pul

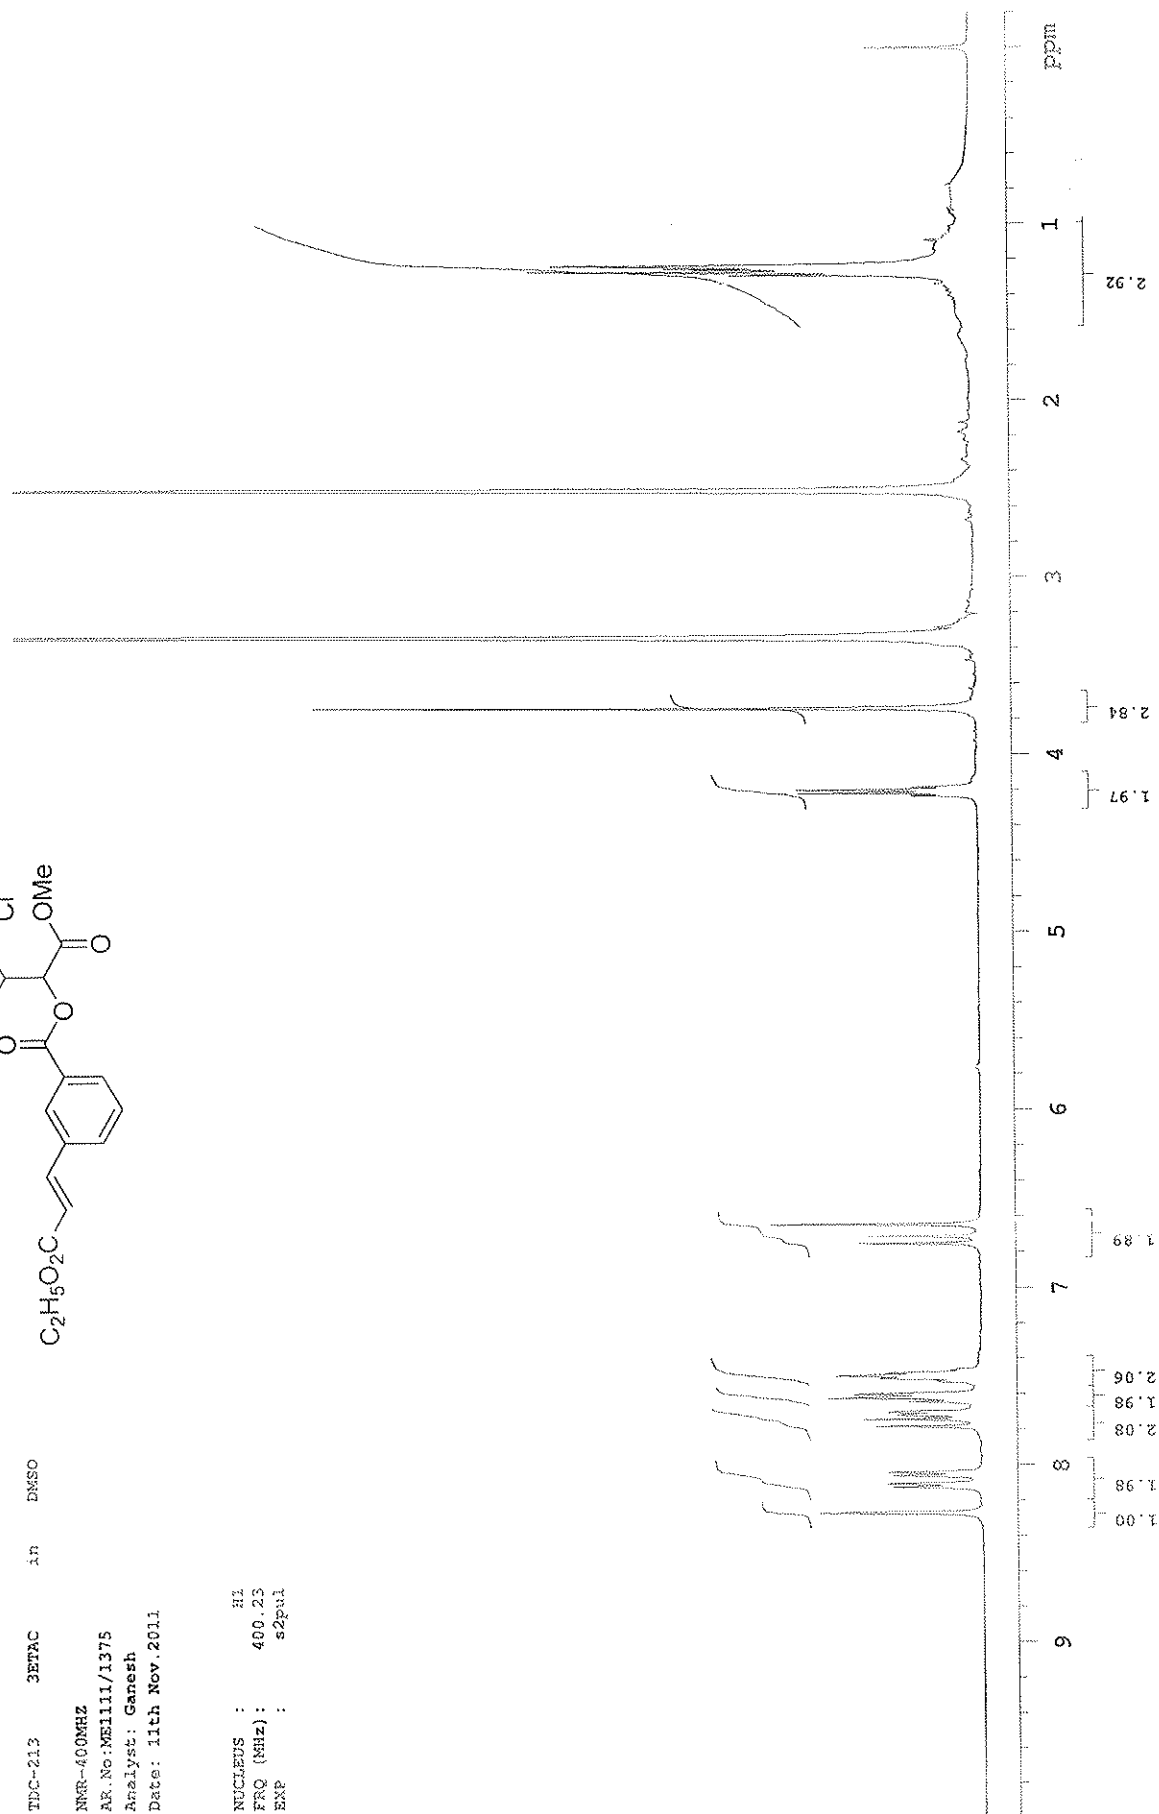

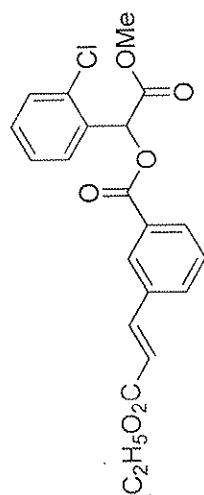

TDC-213 3ETAC in DMSO

NMR-400MHZ  
AR.No:ME1111/599  
Analyst: Haribabu  
Date:04th Nov.2011

NUCLEUS : C13  
FRQ (MHz) : 100.65  
EXP : s2pul

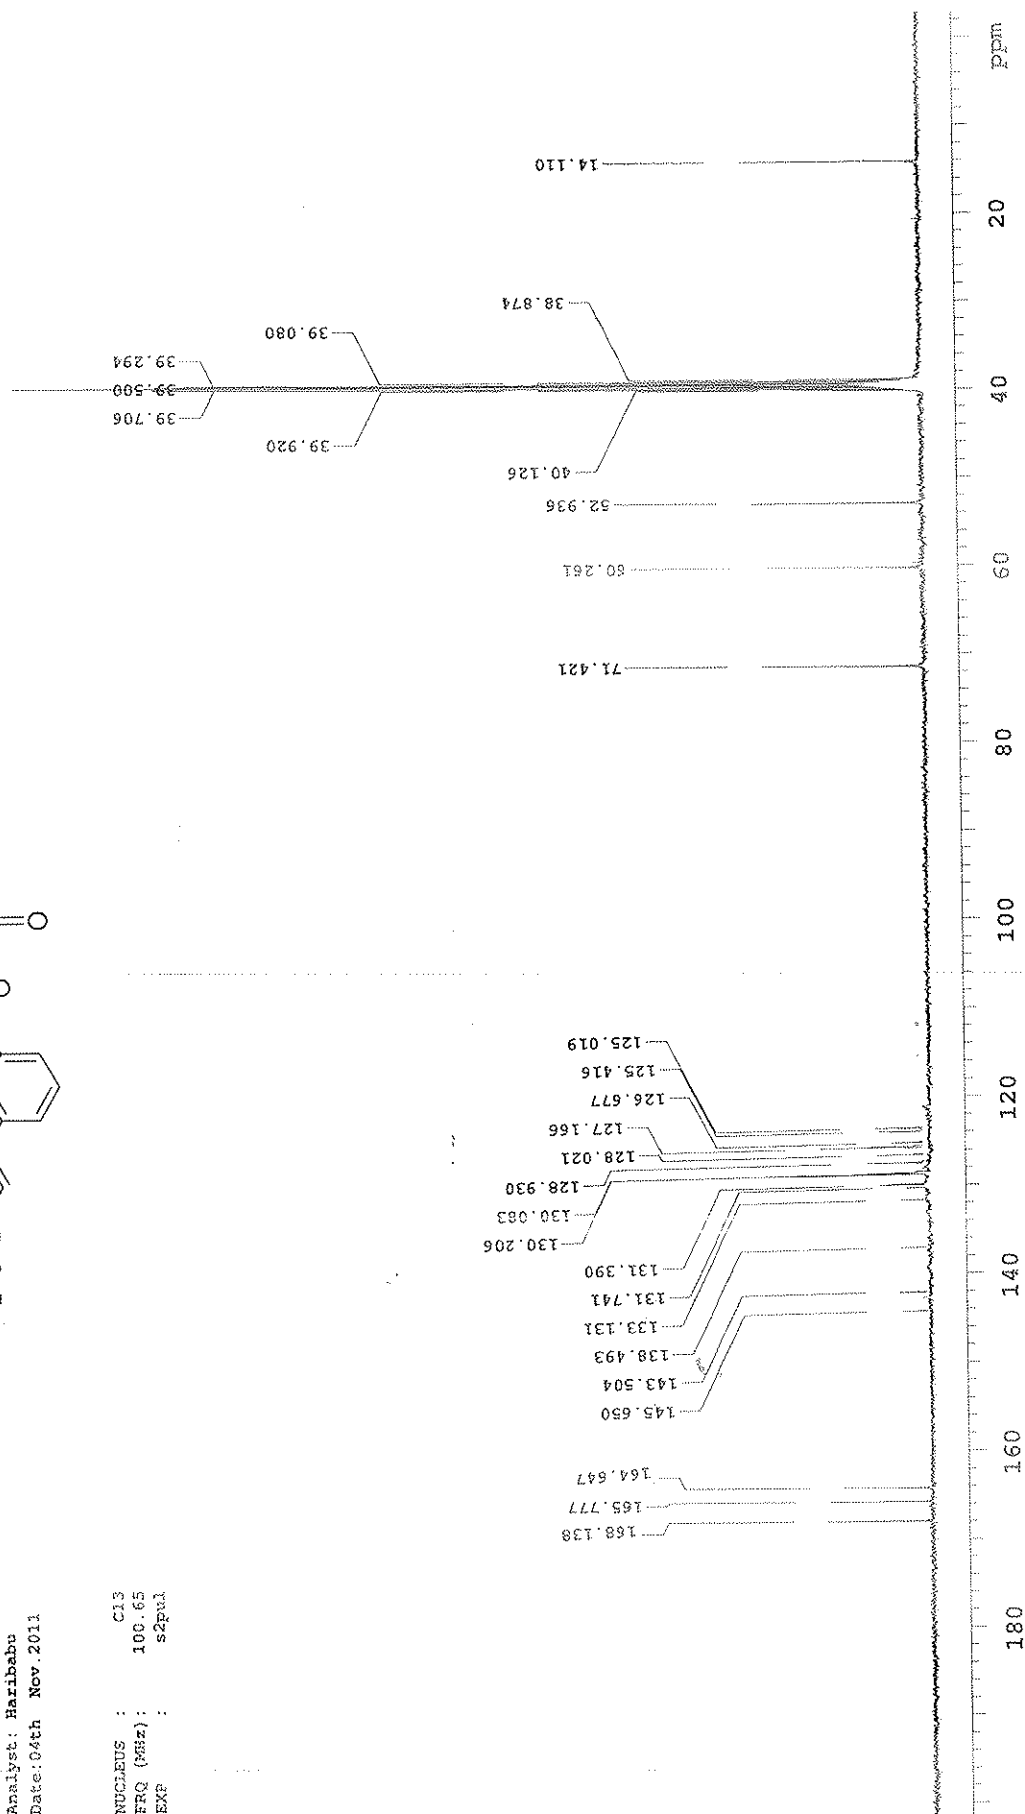



Elemental Composition Report

Page 1

Single Mass Analysis

Tolerance = 10.0 PPM / DBE: min = 0.0, max = 80.0

Element prediction: Off

Number of isotope peaks used for i-FIT = 4

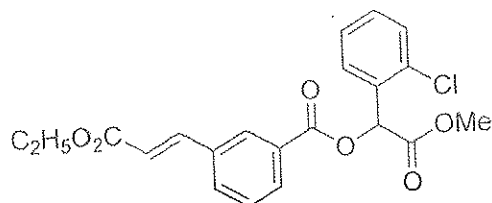

Monoisotopic Mass, Even Electron Ions

31 formula(e) evaluated with 1 results within limits (up to 4 best isotopic matches for each mass)

Elements Used:

C: 0-30 H: 0-30 O: 0-6 Cl: 0-1

3ETAC

Dr.Reddy's Laboratories Ltd, ARD, TDC-1

09-Nov-2011

Kaviraj

1: TOF MS ES+

2.92e+003

UT1111\_40 19 (0.340) Cm (19)

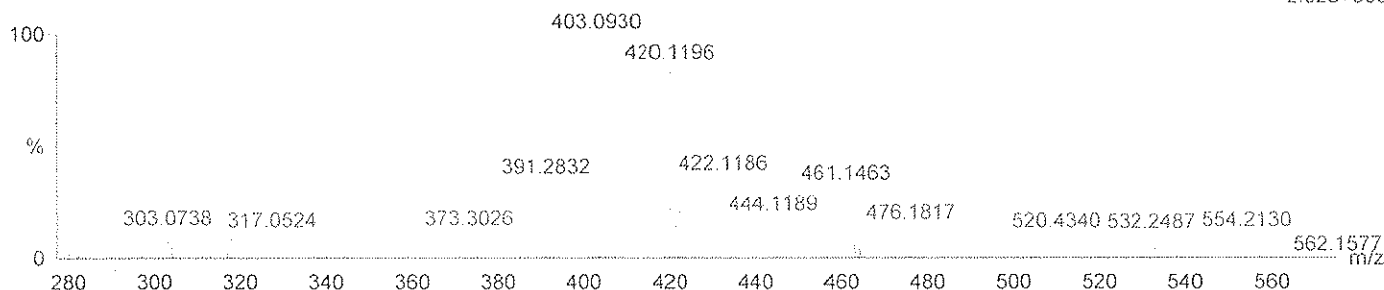

Minimum:

Maximum:

0.0

5.0

10.0

80.0

| Mass     | Calc. Mass | mDa  | PPM  | DBE  | i-FIT | Formula       |
|----------|------------|------|------|------|-------|---------------|
| 403.0930 | 403.0948   | -1.8 | -4.5 | 11.5 | 3.5   | C21 H20 O6 Cl |

Dr. Reddy's  
09/11/2011

09-Nov-2011  
Kaviraj  
1: TOF MS ES+  
2.91e3

Dr.Reddy's Laboratories Ltd, AR&D,TDC-1

3ETAC

UT1111\_40 19 (0.340) Cm (19)

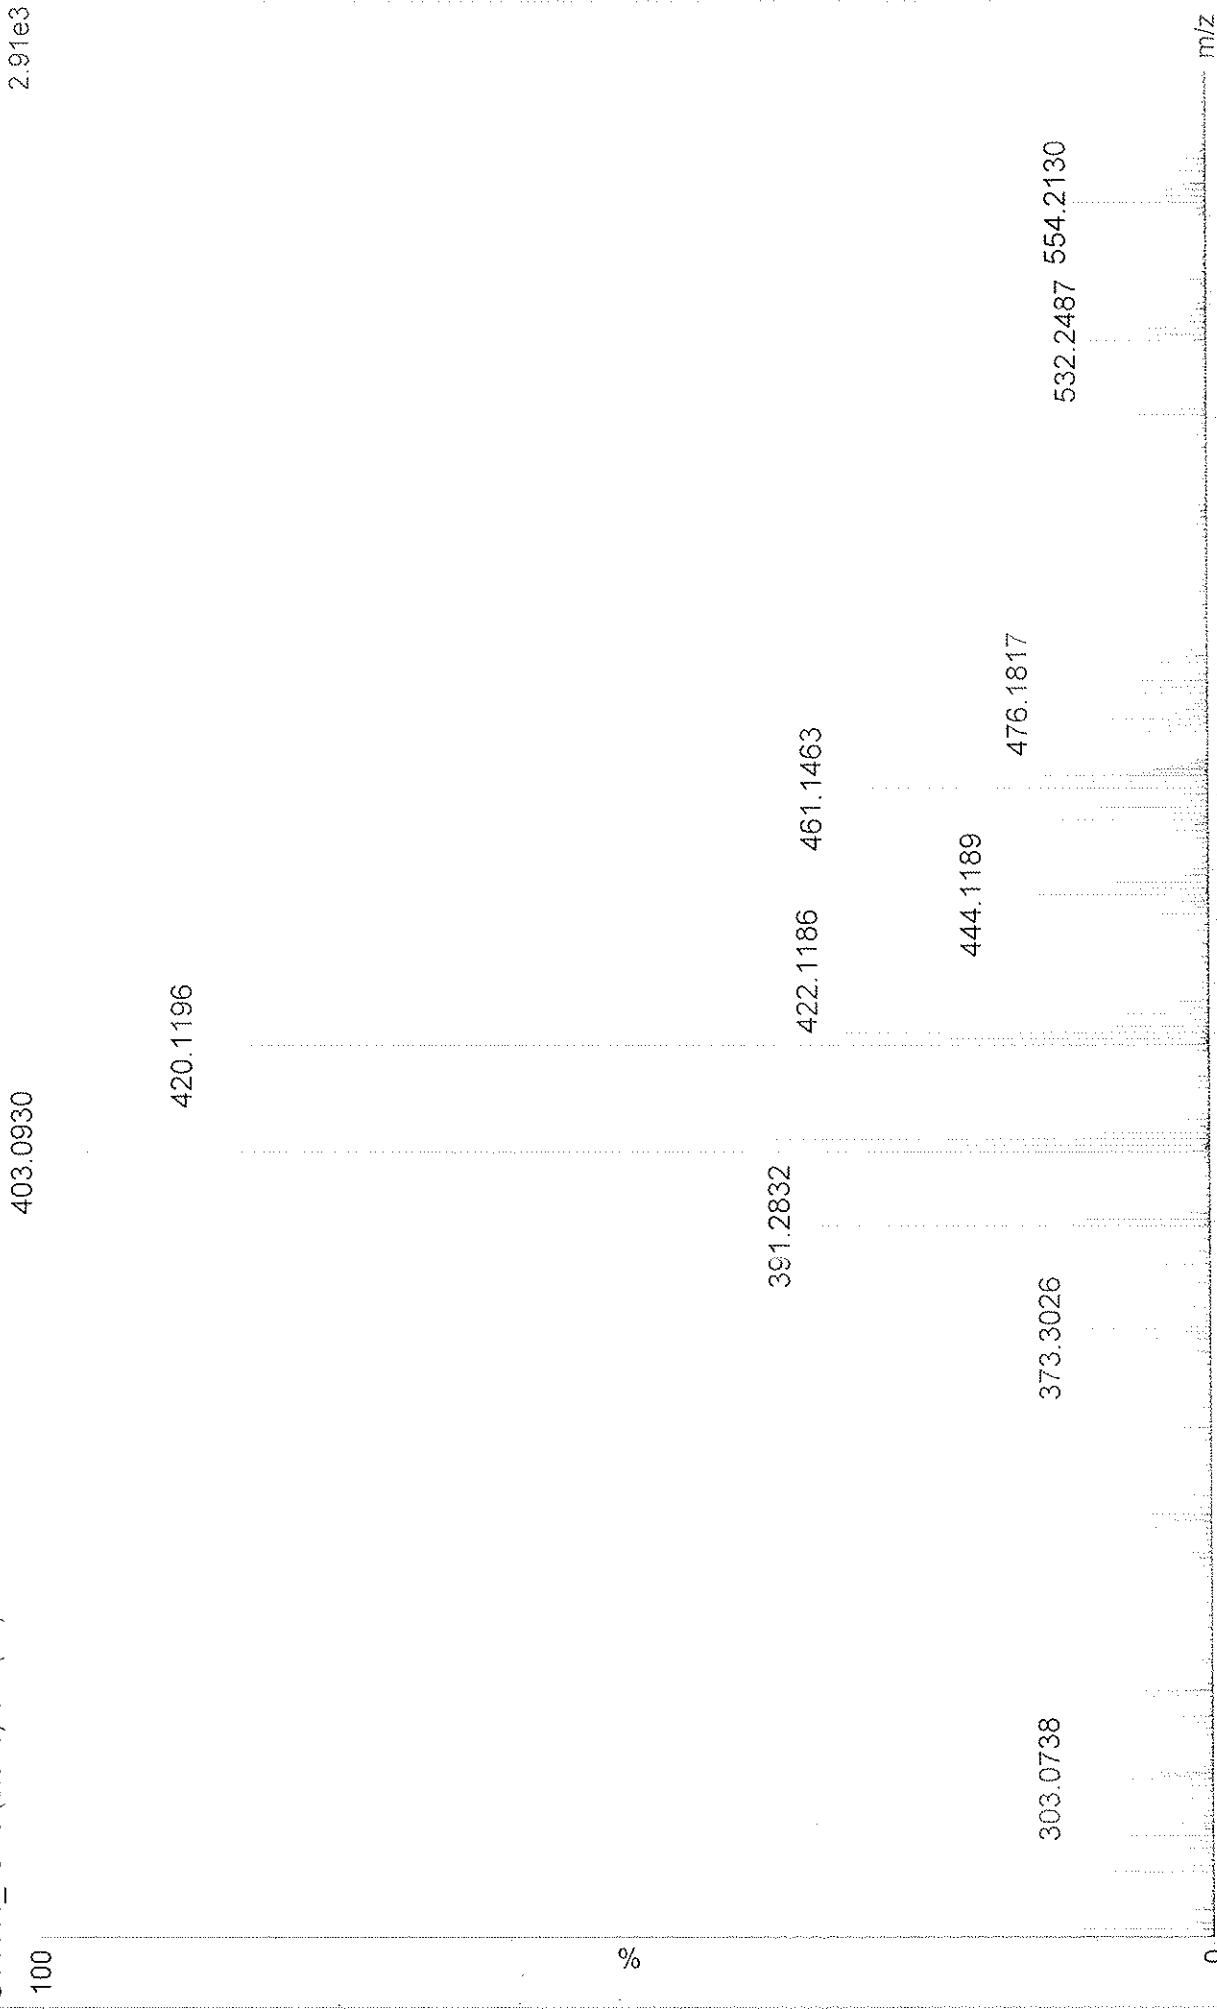

Boboy  
02/11/2011

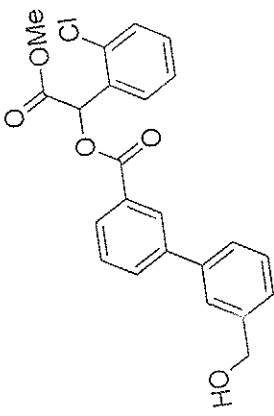

TDC-213 3PBA in DMSO

NMR-400MHZ  
AR.No:ME1111/1239  
Analyst: Ganesh  
Date: 10th Nov. 2011

NUCLEUS : H1  
FREQ (MHz): 400.23  
EXP : s2pul

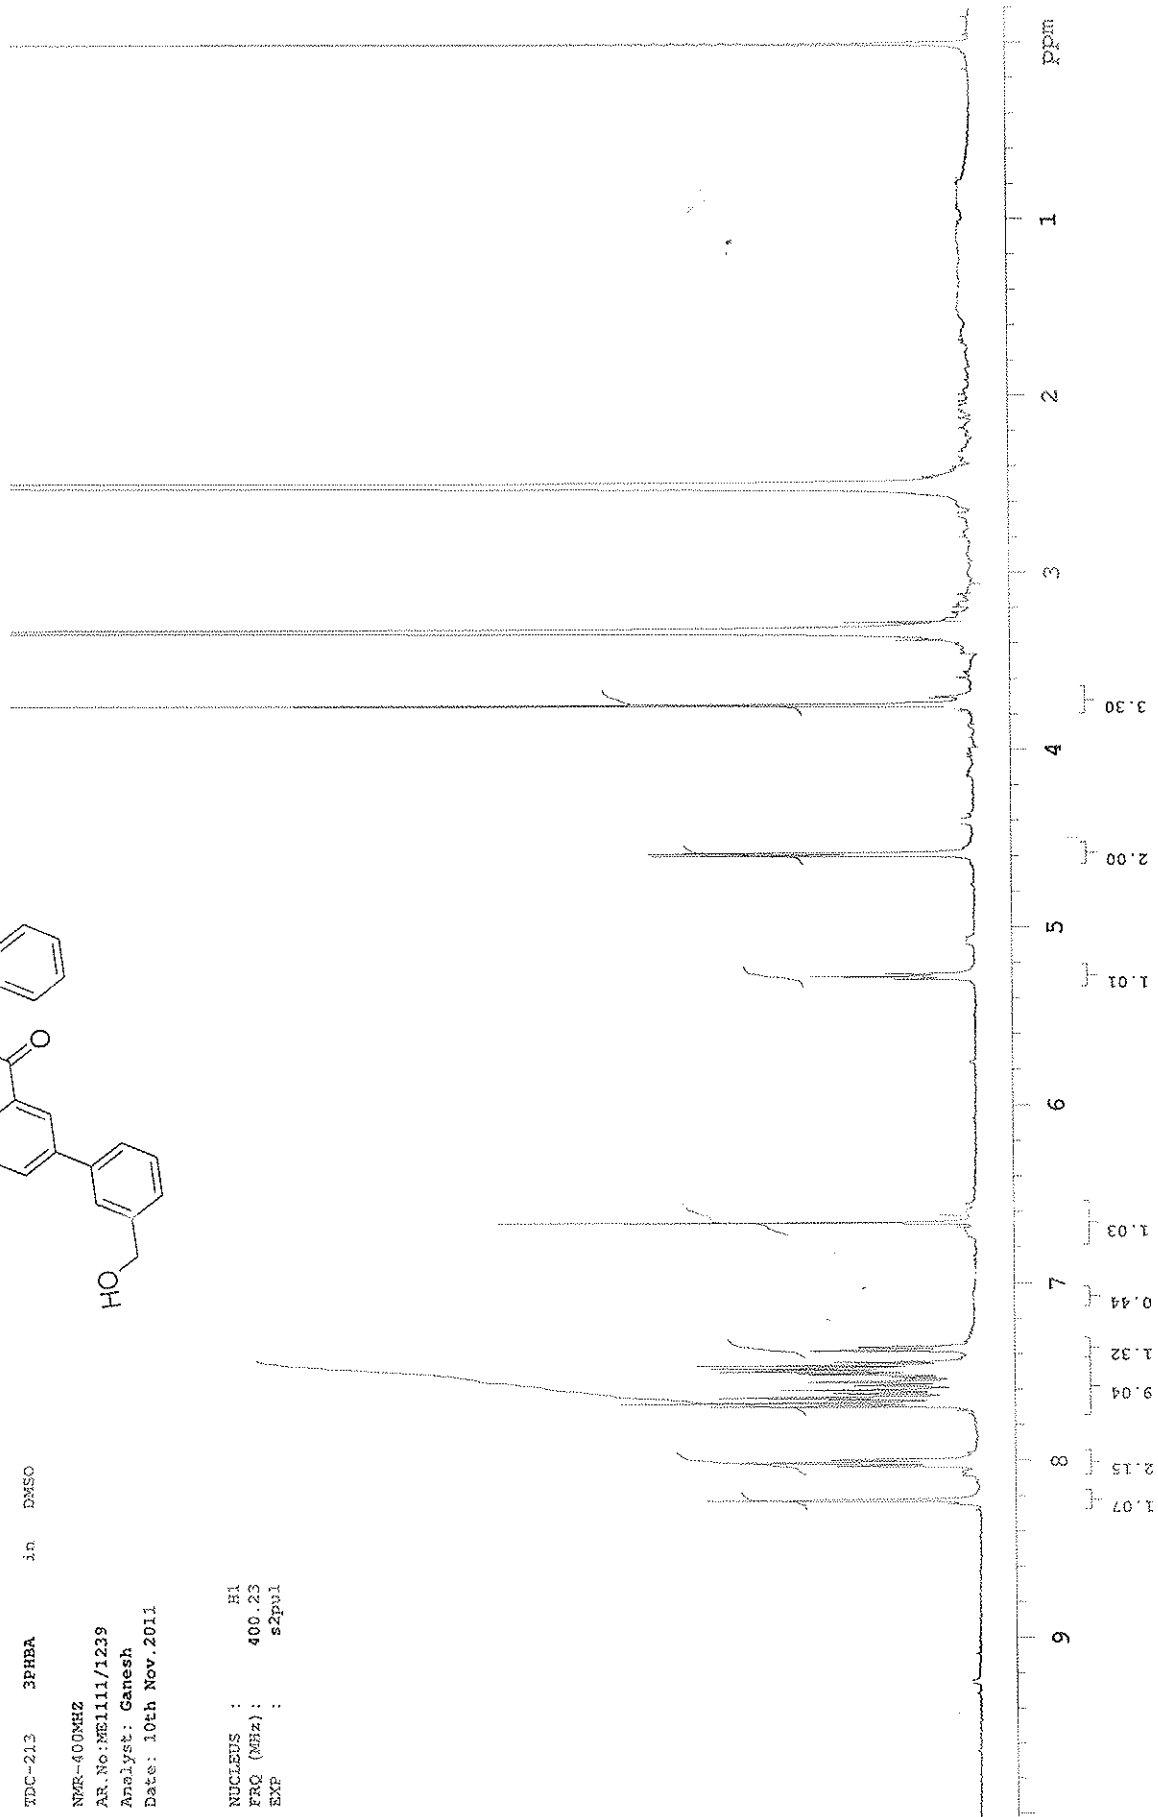

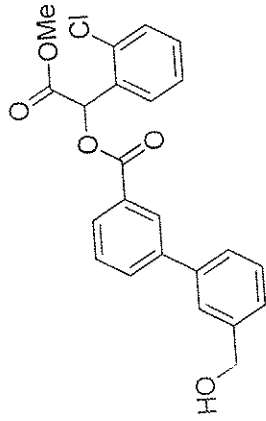

TDC-213 3PBEA in DMSO  
NMR-400MHZ  
AR.No:ME1111/961  
Analyst: Haribabu  
Date: 08th Nov. 2011

NUCLEUS : C13  
FRQ (MHz): 100.65  
EXP : s2pul

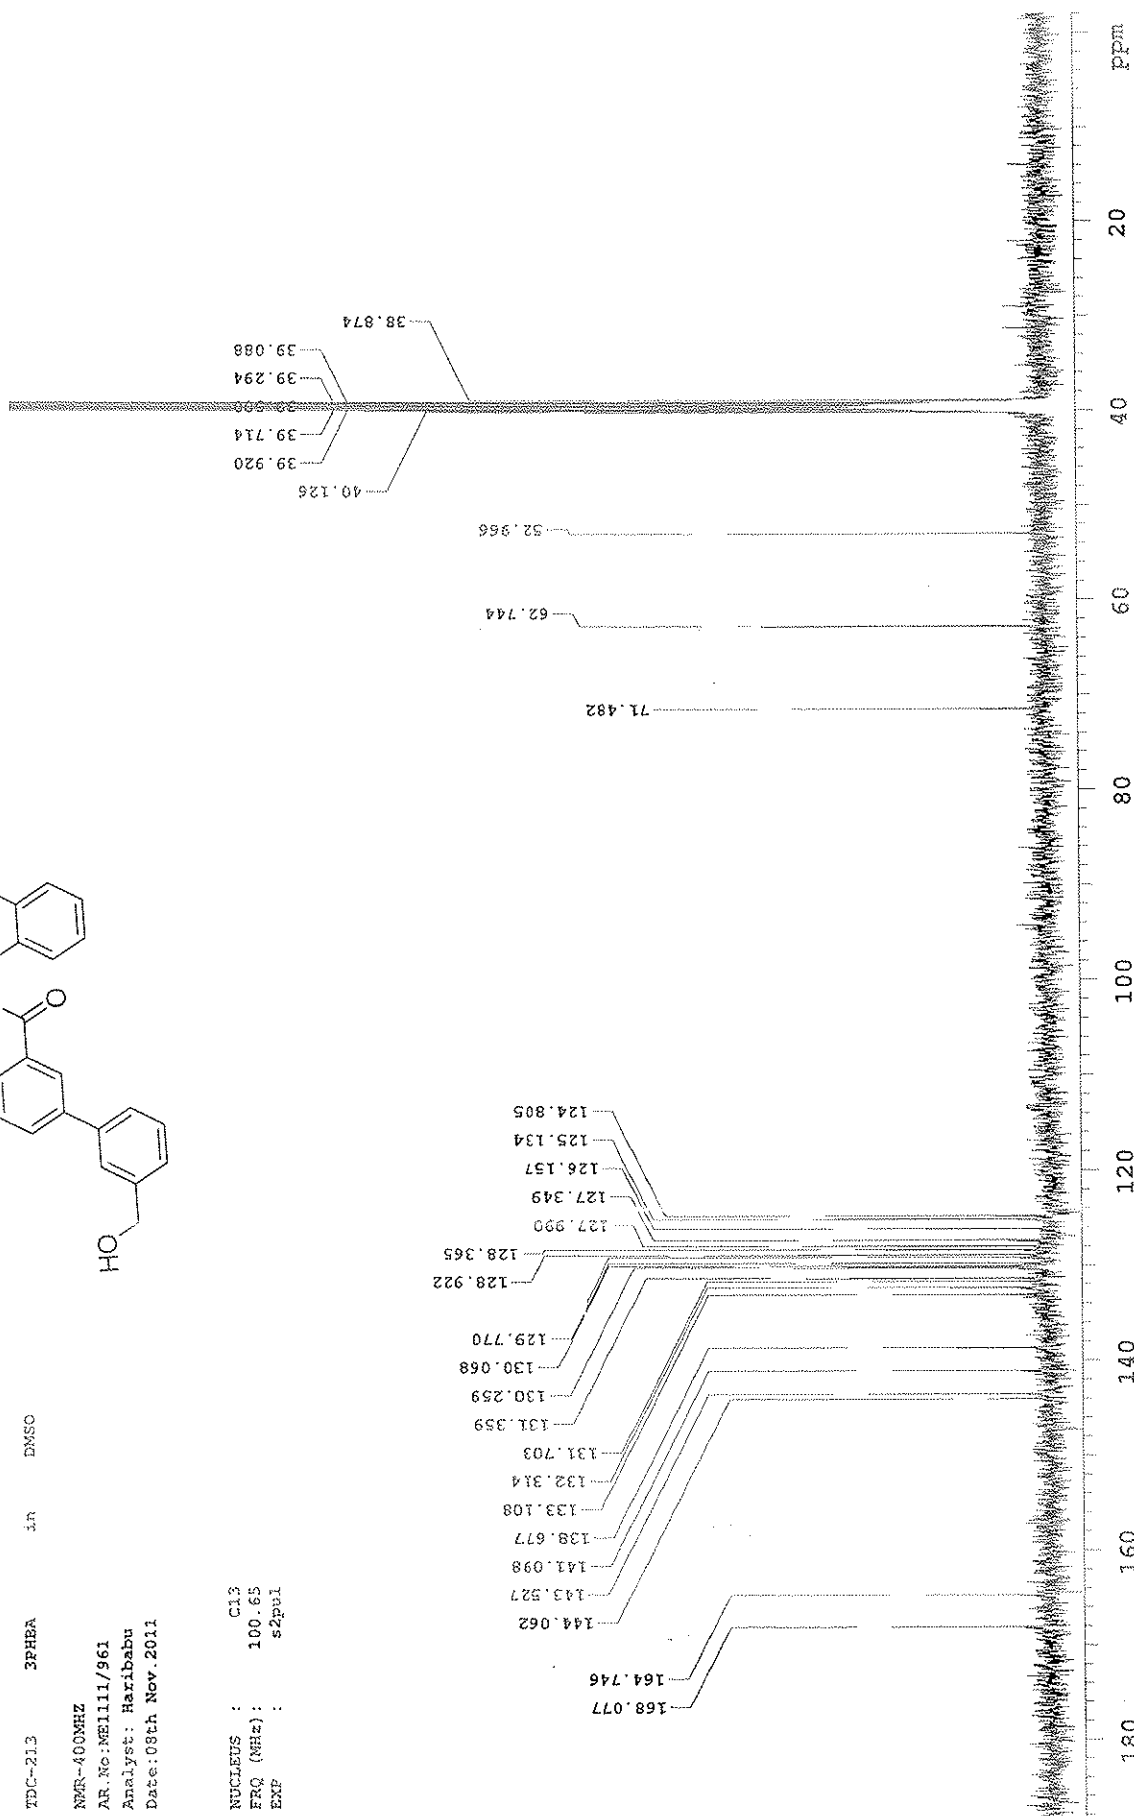

Elemental Composition Report

Single Mass Analysis

Tolerance = 4.0 PPM / DBE: min = 0.0, max = 80.0  
Element prediction: Off  
Number of isotope peaks used for i-FIT = 4

Monoisotopic Mass, Even Electron Ions  
30 formula(e) evaluated with 1 results within limits (up to 4 best isotopic matches for each mass)

Elements Used:  
C: 0-30 H: 0-30 O: 0-6 Cl: 0-1  
3PHBA

UT1111\_38 18 (0.327) Cm (17:24:82:96x0.010)

Dr.Reddy's Laboratories Ltd. ARD.TDC-1

09-Nov-2011  
Kaviraj  
1: TOF MS ES+  
1.96e+004

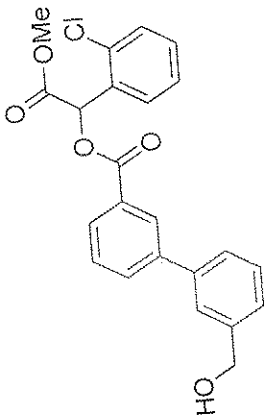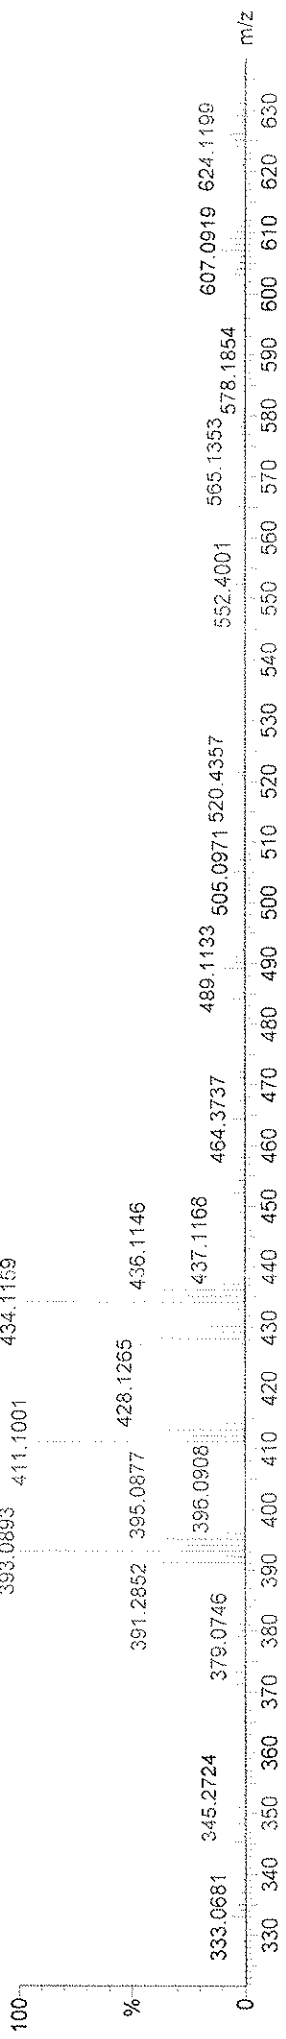

Minimum:  
Maximum:

0.0  
80.0

5.0

4.0

0.0  
80.0

Mass Calc. Mass mDa DBE i-FIT Formula

411.1001 411.0999 0.2 0.5 13.5 2.3 C23 H20 O5 Cl

Revised  
25/11/2011



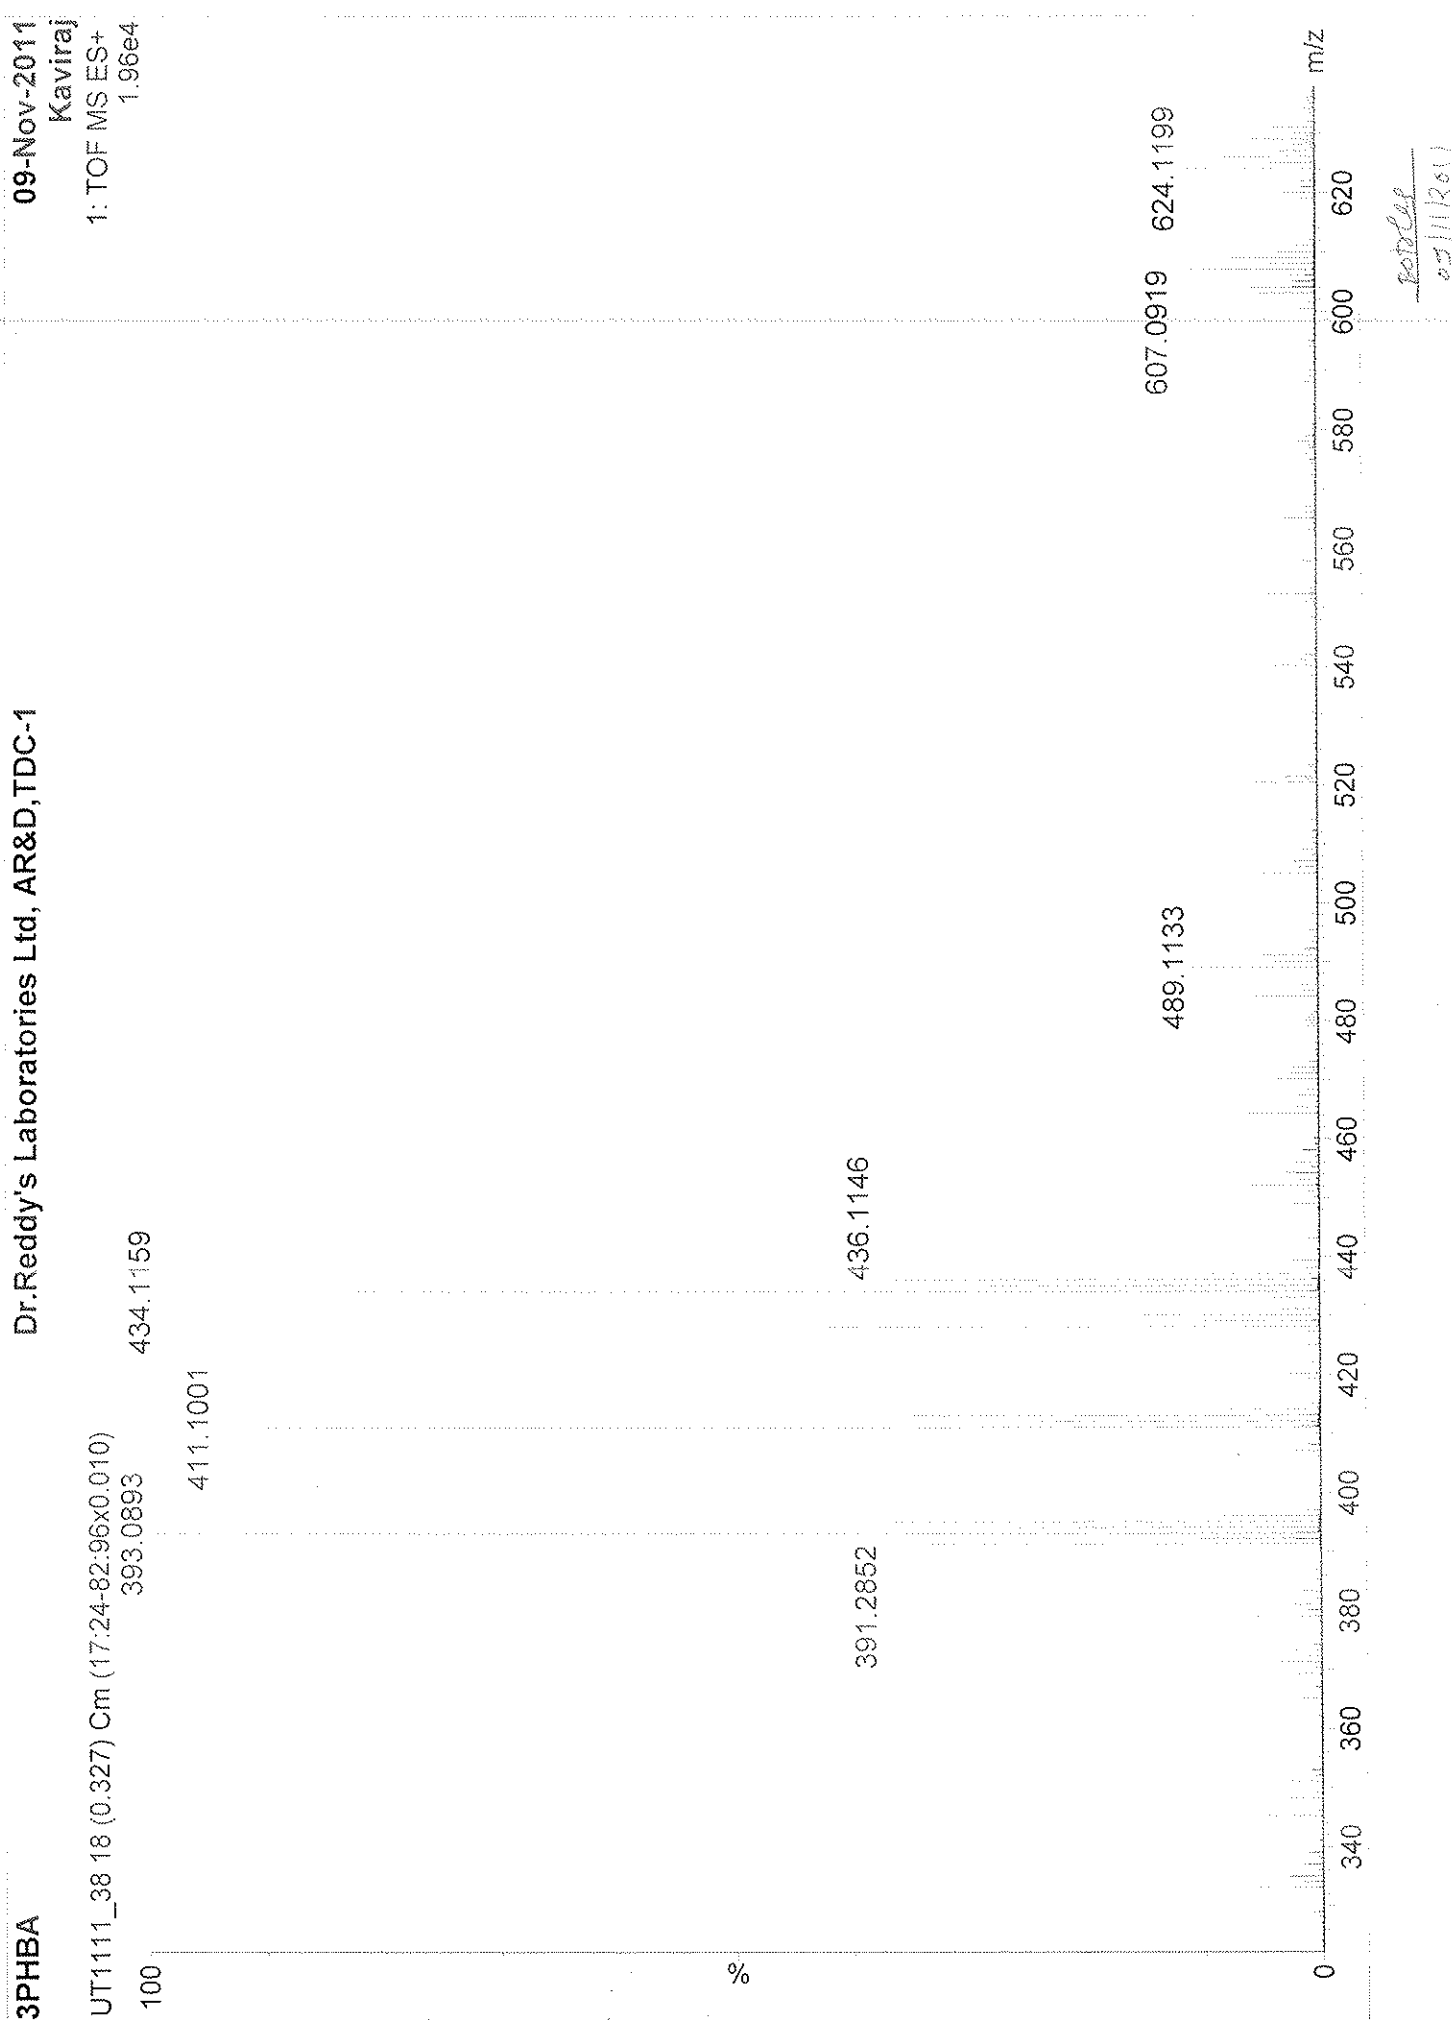

Supplement: c2ob06950d.pdf [file c2ob06950d.pdf]
